# Supplementary material for: Phytochrome A Regulates Carbon Flux in Dark Grown Tomato Seedlings
Source: Front Plant Sci. 2019 Feb 27;10:152. doi: 10.3389/fpls.2019.00152 (PMC6400891; doi:10.3389/fpls.2019.00152)
Supplement: Table S1 — All differentially expressed proteins with average normalized spot volume and standard error for each genotype/condition across biological replicates. [file Data_Sheet_2.xlsx]

## Sheet: Supp_Tab_1
Supplemental Table 1. All differentially expressed proteins with average normalized spot volume and standard error for each genotype/condition across biological replicates.
Gene ID	Spot Number	Locus Description	Average WT-D spot volume	WT-D spot volume standard error	Average WT-R spot volue	WT-R spot volume standard error	Average phyA-D spot volue	phyA-D spot volume standard error	Average phyA-R spot volue	phyA-R spot volume standard error	Figure 2B Venn diagram sector	Overlap with DETs?
Solyc00g042130	99	ATP synthase subunit alpha (D4Z4I4_SPHJU)	0.588117	0.03752	0.564452	0.059616	0.283732	0.024332	0.217845	0.03962	A	No
Solyc01g007940	34	Alanine aminotransferase 2 (A8IKE5_SOYBN)	0.360843	0.055122	0.576053	0.048197	0.232525	0.023766	0.171668	0.011376	E	Yes
Solyc01g028810	191	chaperonin (B4VMY1_9CYAN)	0.29461	0.05356	0.234222	0.018261	0.172563	0.015289	0.122767	0.011842	C	Yes
Solyc01g098850	116	Short-chain dehydrogenase/reductase family protein (D7L3S3_ARALY)	0.434915	0.037044	0.263487	0.056405	0.166133	0.019785	0.13079	0.018548	D	No
Solyc01g100380	48	Calreticulin 2 calcium-binding protein (A8HMC0_CHLRE)	0.891083	0.163391	0.96244	0.046148	0.992995	0.06879	0.177995	0.022277	F	Yes
Solyc01g101060	142	S-adenosyl-L-methionine synthetase (manually curated)	0.729103	0.063276	0.637542	0.050622	0.339462	0.086276	0.275513	0.034624	A	No
Solyc01g103450	217	Chaperone DnaK (Q1SKX2_MEDTR)	0.173613	0.022605	0.266772	0.030622	0.088393	0.01311	0.170818	0.013087	E	Yes
Solyc01g103450	216	Chaperone DnaK (Q1SKX2_MEDTR)	0.239452	0.044366	0.233877	0.029246	0.333995	0.028773	0.40977	0.028055	J	Yes
Solyc01g104170	55	Ankyrin repeat domain-containing protein 2 (B6TNC0_MAIZE)	0.102503	0.023532	0.150273	0.009501	0.031912	0.009675	0.03291	0.010376	A	No
Solyc01g104775	195	No description	1.25109	0.249032	1.4264	0.06545	1.31464	0.153667	0.731257	0.055187	F	No
Solyc01g104950	168	LEXYL2 (manually curated)	0.195073	0.025949	0.174622	0.014034	0.231227	0.022157	0.022633	0.010002	F	Yes
Solyc02g032940	69	Aspartic proteinase (Q8L6A8_THECC)	0.056878	0.008348	0.038347	0.005405	0.123455	0.010669	0.07072	0.011023	C	Yes
Solyc02g063130	53	UV excision repair protein RAD23 (B6JX15_SCHJY)	0.175682	0.022405	0.250893	0.026343	0.162927	0.018593	0.113693	0.006169	F	No
Solyc02g079290	133	SELF PRUNING 2G	0.248588	0.03376	0.1941	0.012655	0.400323	0.057779	0.368618	0.019331	A	Yes
Solyc02g080880	123	Aspartic proteinase (Q8L6A8_THECC)	0.150775	0.022101	0.127782	0.016809	0.25915	0.012698	0.285163	0.015519	A	No
Solyc02g085590	81	Vicilin (Fragment) (B4X640_PISVE)	0.165182	0.024958	0.192283	0.017635	0.116083	0.015722	0.077957	0.014252	J	Yes
Solyc02g087880	2	Tubulin alpha-7 chain (B9IJV8_POPTR)	1.4972	0.261321	0.673883	0.089815	1.96575	0.255309	2.40691	0.122623	F	Yes
Solyc02g088260	45	Latex abundant protein 1 (Q6XNP6_HEVBR)	0.131743	0.016212	0.086392	0.01547	0.05669	0.011024	0.026537	0.009911	A	No
Solyc03g005730	28	3-isopropylmalate dehydratase large subunit 2 (B6U6T6_MAIZE)	0.190682	0.021864	0.25156	0.05368	0.100482	0.007339	0.062262	0.008106	C	No
Solyc03g019780	57	40S ribosomal protein SA (B6T6X2_MAIZE)	0.206555	0.026026	0.2312	0.012061	0.164103	0.014807	0.091152	0.014411	F	Yes
Solyc03g031740	33	Glucose-6-phosphate/phosphate translocator 2 (D7KVF2_ARALY)	0.159402	0.015523	0.201588	0.02288	0.107513	0.010471	0.09483	0.009088	A	No
Solyc03g082920	178	Heat shock protein (Q84KP8_CYAME)	0.081378	0.016425	0.022935	0.006458	0.060655	0.013872	0.056427	0.012256	M	Yes
Solyc03g112150	36	Elongation factor Tu (D7MFK2_ARALY)	0.33024	0.032576	0.384158	0.01299	0.217375	0.026956	0.189558	0.013834	A	Yes
Solyc03g120850	189	chaperonin (B2IXD2_NOSP7)	0.283457	0.051351	0.121673	0.016795	0.124765	0.005835	0.090182	0.013168	H	Yes
Solyc04g007550	193	ATP synthase subunit beta (O82722_NICSY)	0.474715	0.083761	0.533313	0.028313	0.380228	0.03347	0.304647	0.011935	J	Yes
Solyc04g011500	35	Actin 4 (B9HMH5_POPTR)	0.477437	0.036471	0.559023	0.034895	0.650915	0.05549	0.33324	0.03125	C	No
Solyc04g011510	159	Triosephosphate isomerase (Q38JI4_SOLTU)	0.670438	0.10103	0.694882	0.05119	0.398208	0.027561	0.328223	0.019789	A	Yes
Solyc04g078540	94	Cathepsin B-like cysteine proteinase (CYSP_SCHMA)	0.25917	0.070325	0.335923	0.008732	0.20628	0.022811	0.19739	0.016387	J	Yes
Solyc04g081490	49	beta-tubulin (manually curated)	0.753055	0.069677	0.846192	0.091448	0.670623	0.148086	0.145378	0.023581	F	Yes
Solyc04g082200	56	dehydrin (manually curated)	0.17056	0.018482	0.261072	0.036943	0.482413	0.036849	0.403543	0.037623	A	Yes
Solyc05g008460	200	ATP synthase subunit beta (O82722_NICSY)	0.595623	0.024486	0.425577	0.041525	0.330683	0.041801	0.304592	0.020167	B	No
Solyc05g014470	111	glyceraldehyde 3-phosphate dehydrogenase (manually curated)	0.377803	0.144083	0.631188	0.134176	0.564655	0.066079	0.211497	0.014408	F	Yes
Solyc05g014470	112	glyceraldehyde 3-phosphate dehydrogenase (manually curated)	0.686005	0.146482	0.28998	0.055704	0.14786	0.017993	0.222273	0.022292	H	Yes
Solyc05g054580	84	60S acidic ribosomal protein P0 (D7L9V8_ARALY)	0.12539	0.016519	0.080055	0.009174	0.045307	0.009337	0.03986	0.006995	B	Yes
Solyc06g005910	91	Tubulin beta chain (B9GWG9_POPTR)	0.29882	0.036931	0.309537	0.032137	0.246357	0.05126	0.06344	0.01701	F	Yes
Solyc06g060290	218	Protein disulfide isomerase (B1Q2X4_SOYBN)	0.21748	0.054187	0.210683	0.023303	0.301267	0.037717	0.145675	0.012703	F	Yes
Solyc06g063090	3	Alanine aminotransferase (Q6VEJ5_CAPAN)	0.221543	0.038054	0.184873	0.012968	0.133945	0.023699	0.093092	0.005353	J	No
Solyc06g072580	143	Pyruvate dehydrogenase E1 component subunit beta (B6T6H3_MAIZE)	0.308403	0.031713	0.37772	0.025021	0.240497	0.034622	0.14109	0.034053	J	Yes
Solyc07g020860	80	Peroxiredoxin (D2D300_GOSHI)	0.259553	0.024729	0.248983	0.014682	0.110745	0.019251	0.105232	0.014636	A	Yes
Solyc07g044840	209	2 3-bisphosphoglycerate-independent phosphoglycerate mutase (B9S1V6_RICCO)	0.250402	0.035351	0.256718	0.02351	0.16907	0.026122	0.270692	0.009966	N	No
Solyc07g052350	18	3-isopropylmalate dehydratase large subunit (LEUC_NATPD)	0.227115	0.03509	0.080948	0.012804	0.264238	0.062096	0.126508	0.032785	O	Yes
Solyc07g052350	19	3-isopropylmalate dehydratase large subunit (LEUC_NATPD)	0.146708	0.034374	0.142077	0.018814	0.123525	0.019067	0.065967	0.010555	F	Yes
Solyc07g052350	21	3-isopropylmalate dehydratase large subunit (LEUC_NATPD)	0.132092	0.02505	0.126293	0.023149	0.091475	0.024458	0.024062	0.012686	F	Yes
Solyc07g053280	26	Ketol-acid reductoisomerase (D6QSY0_CATRO)	0.180595	0.025714	0.217925	0.019543	0.127277	0.027659	0.10494	0.003245	J	No
Solyc07g062650	110	Malate dehydrogenase (manually curated)	1.47071	0.101341	1.65156	0.107688	1.1892	0.0424	1.16086	0.055419	A	Yes
Solyc08g006890	4	Tubulin alpha-3 chain (B6SPX4_MAIZE)	0.36028	0.041633	0.403655	0.031429	0.225065	0.045381	0.106868	0.015936	F	No
Solyc08g065220	23	glycine decarboxylase p-protein (manually curated)	0.151923	0.028963	0.10664	0.016223	0.051313	0.01369	0.040398	0.012872	A	No
Solyc08g074682	27	No description	0.139603	0.013939	0.17291	0.019597	0.090052	0.027484	0.051277	0.016231	J	No
Solyc08g080140	121	dTDP-4-dehydrorhamnose reductase (B6STR1_MAIZE)	0.182428	0.018835	0.141522	0.012712	0.11214	0.016517	0.03558	0.003688	C	Yes
Solyc08g082820	179	TOMBIPGRBC Tomato BiP (binding protein)/grp78 (manually curated)	0.07068	0.010541	0.021092	0.005686	0.074503	0.017163	0.066548	0.011481	M	Yes
Solyc09g008280	162	S-adenosyl-L-methionine synthetase Z24743 (manually curated)	0.717685	0.084847	0.77525	0.02616	0.548568	0.091882	0.225067	0.018966	F	No
Solyc09g009020	1	enolase (manually curated)	0.509463	0.035185	0.399415	0.049037	0.240395	0.025778	0.302722	0.02335	G	Yes
Solyc09g009020	32	enolase (manually curated)	0.937633	0.08598	1.09324	0.032467	0.489487	0.050458	0.28742	0.023287	C	Yes
Solyc09g009030	58	Histone deacetylase 2a-like (Q2XTE1_SOLTU)	0.15076	0.015388	0.13624	0.006513	0.207793	0.021208	0.130445	0.01145	N	Yes
Solyc09g009390	5	Monodehydroascorbate reductase (NADH)-like protein (Q0WUJ1_ARATH)	0.151105	0.02128	0.16602	0.015337	0.094627	0.007282	0.087995	0.006228	A	No
Solyc09g010630	181	HSC2-like (manually curated)	0.15083	0.02563	0.049022	0.008329	0.113592	0.028406	0.043873	0.007027	L	Yes
Solyc09g025210	85	alcohol dehydrogenase-2 (manually curated)*	1.53209	0.100965	1.27379	0.100638	1.6652	0.107559	2.04342	0.153798	J	Yes
Solyc09g025210	114	alcohol dehydrogenase-2 (manually curated)*	8.45345	0.686789	6.65275	0.528437	9.0665	0.591916	9.77642	0.450536	J	Yes
Solyc09g025210	76	alcohol dehydrogenase-2 (manually curated)*	0.488068	0.052737	0.862083	0.059623	0.47145	0.090594	0.527427	0.057563	M	Yes
Solyc09g025210	83	alcohol dehydrogenase-2 (manually curated)*	0.318457	0.046648	1.31381	0.066267	0.427185	0.083467	0.355658	0.048863	M	Yes
Solyc09g025210	115	alcohol dehydrogenase-2 (manually curated)*	5.05425	0.734095	3.10583	0.277772	5.62114	0.539312	6.39124	0.305106	M	Yes
Solyc09g025210	29	alcohol dehydrogenase-2 (manually curated)*	0.22604	0.034225	0.249237	0.013833	0.132058	0.017007	0.133367	0.012074	A	Yes
Solyc09g025210	86	alcohol dehydrogenase-2 (manually curated)*	0.421508	0.043691	0.424043	0.037831	0.93778	0.129648	1.10079	0.076197	A	Yes
Solyc09g025210	13	alcohol dehydrogenase-2 (manually curated)*	0.134492	0.026637	0.093515	0.014426	0.071792	0.019057	0.345293	0.027815	F	Yes
Solyc09g025210	140	alcohol dehydrogenase-2 (manually curated)*	6.2384	0.494557	4.82811	0.257304	5.67525	0.100944	6.89637	0.294792	I	Yes
Solyc09g025210	149	alcohol dehydrogenase-2 (manually curated)*	1.11318	0.128989	0.63525	0.024214	1.56635	0.109269	1.73773	0.071826	B	Yes
Solyc09g072560	131	Legumin 11S-globulin (Q39770_GINBI)	1.05955	0.128358	1.61404	0.11575	1.29359	0.138166	1.53675	0.097111	O	Yes
Solyc09g072560	151	Legumin 11S-globulin (Q39770_GINBI)	2.99313	0.440027	5.52984	0.216844	3.76086	0.423733	3.77453	0.258474	M	Yes
Solyc09g072560	59	Legumin 11S-globulin (Q39770_GINBI)	0.111658	0.008526	0.131342	0.026126	0.030898	0.00933	0.014703	0.001979	A	Yes
Solyc09g072560	120	Legumin 11S-globulin (Q39770_GINBI)	0.293517	0.03977	0.197742	0.036476	0.746465	0.08464	0.736883	0.081061	A	Yes
Solyc09g072560	153	Legumin 11S-globulin (Q39770_GINBI)	1.49048	0.117762	1.30651	0.164493	2.55947	0.198298	2.34691	0.15674	A	Yes
Solyc09g072560	119	Legumin 11S-globulin (Q39770_GINBI)	0.742057	0.05454	0.601865	0.077914	0.878532	0.128394	1.39481	0.109524	F	Yes
Solyc09g072560	138	Legumin 11S-globulin (Q39770_GINBI)	0.696557	0.051136	0.504767	0.071745	0.920005	0.094134	1.26062	0.073648	F	Yes
Solyc09g072560	117	Legumin 11S-globulin (Q39770_GINBI)	3.54393	0.28525	2.45394	0.207857	4.66977	0.146151	5.08165	0.214059	B	Yes
Solyc09g072560	118	Legumin 11S-globulin (Q39770_GINBI)	4.59767	0.54188	3.03665	0.311254	6.19856	0.26707	6.38366	0.203778	B	Yes
Solyc09g072560	130	Legumin 11S-globulin (Q39770_GINBI)	0.095732	0.014229	0.041495	0.00444	0.188848	0.025255	0.208407	0.022427	B	Yes
Solyc09g073000	108	Elongation factor Tu (B9SFP0_RICCO)	0.229753	0.012368	0.148815	0.017338	0.158332	0.021514	0.098855	0.012261	B	Yes
Solyc09g082330	15	7S vicilin (Fragment) (B3STU7_CARIL)	2.18598	0.304577	2.29402	0.222246	1.59868	0.27745	1.57316	0.09882	J	Yes
Solyc09g090140	164	ferredoxin 1 (manually curated)	0.95351	0.08136	0.83361	0.021674	0.567992	0.060461	0.493038	0.038988	A	Yes
Solyc09g090150	135	Legumin 11S-globulin (Q39770_GINBI)	2.54094	0.391212	4.00773	0.17757	2.77712	0.365697	2.98062	0.417137	J	Yes
Solyc09g090150	155	Legumin 11S-globulin (Q39770_GINBI)	0.241317	0.019867	0.199827	0.04055	0.377865	0.055047	0.372118	0.032075	J	Yes
Solyc09g090150	147	Legumin 11S-globulin (Q39770_GINBI)	0.062503	0.011355	0.07284	0.012156	0.275883	0.023738	0.10706	0.009994	K	Yes
Solyc09g090150	154	Legumin 11S-globulin (Q39770_GINBI)	0.764355	0.078384	0.554295	0.073706	1.12275	0.073689	1.36022	0.078731	A	Yes
Solyc09g090150	141	Legumin 11S-globulin (Q39770_GINBI)	1.38068	0.172189	0.941747	0.099267	1.53496	0.128713	2.03623	0.178077	I	Yes
Solyc10g055250	148	Cold shock protein-1 (Q8LPA7_WHEAT)	0.364098	0.11603	0.179317	0.024317	0.485755	0.086024	0.428235	0.04479	J	Yes
Solyc10g081030	70	Nascent polypeptide-associated complex alpha subunit-like protein (B6T903_MAIZE)	0.046162	0.006641	0.120543	0.016186	0.098477	0.021302	0.095753	0.039643	D	Yes
Solyc10g081510	24	ethylene-responsive methionine synthase (manually curated)	0.490297	0.077182	0.495008	0.098825	0.19184	0.053208	0.036938	0.008864	C	No
Solyc10g086170	67	Glutamyl-tRNA(Gln) amidotransferase subunit A (D5DXY7_BACMQ)	0.172822	0.015949	0.232562	0.023244	0.133787	0.01034	0.290888	0.033715	N	No
Solyc10g086170	68	Glutamyl-tRNA(Gln) amidotransferase subunit A (D5DXY7_BACMQ)	0.147448	0.015297	0.211002	0.02081	0.1656	0.016065	0.218218	0.005513	L	No
Solyc10g086190	96	Adenosine kinase (D2D2Z6_GOSHI)	0.300537	0.029029	0.34675	0.014475	0.211788	0.029106	0.11059	0.010841	F	Yes
Solyc11g010990	105	Alcohol dehydrogenase (ADH2_BACST)	0.696727	0.094654	1.03021	0.205801	1.21351	0.185212	1.20596	0.144475	G	No
Solyc11g011330	106	Cinnamyl alcohol dehydrogenase (D1FWZ8_SOYBN)	0.868565	0.106275	0.80076	0.05154	0.309198	0.049632	0.145075	0.025757	C	Yes
Solyc11g011470	177	NADH-ubiquinone oxidoreductase subunit (B9T118_RICCO)	0.084637	0.018384	0.079872	0.026893	0.09471	0.01275	0.051107	0.009351	N	Yes
Solyc11g069270	102	beta-galactosidase 5 (manually curated)	0.629757	0.047683	0.29481	0.036337	0.73288	0.072285	0.71734	0.037448	M	No
Solyc11g069790	88	chaperonin (B2IXD2_NOSP7)	0.334695	0.046372	0.175275	0.026982	0.118705	0.012724	0.07576	0.012986	E	Yes
Solyc11g072380	72	Vicilin-like protein (Fragment) (Q9SEW4_9ROSI)	0.65635	0.034188	0.51632	0.050954	1.14409	0.116653	1.17657	0.069763	A	Yes
Solyc11g072380	145	Vicilin-like protein (Fragment) (Q9SEW4_9ROSI)	0.22878	0.030868	0.157083	0.018996	0.386802	0.020841	0.40275	0.017312	A	Yes
Solyc12g005860	20	3-isopropylmalate dehydratase large subunit (LEUC_BACWK)	0.07793	0.013108	0.06024	0.010004	0.129793	0.023968	0.02698	0.006282	F	Yes
Solyc12g010040	171	leucine aminopeptidase 1 (manually curated)	0.319805	0.022424	0.278078	0.008483	0.25908	0.024926	0.096448	0.015018	F	No
Solyc12g095960	175	Insulin-like growth factor 2 mRNA-binding protein 2 (IF2B2_PONAB)	0.032138	0.005626	0.017403	0.002328	0.038845	0.009462	0.01495	0.004247	N	No
Solyc12g099000	37	S-adenosylmethionine synthase (B8LFH4_IPOBA)	0.376362	0.028376	0.48886	0.051224	0.229112	0.01244	0.234042	0.022768	A	Yes
* Solyc09g025210 is mis-annotated as ADH2 on the locus page on solgenomics.org, but the gene feature details on solgenomics.org and a protein BLAST search using the MASCOT search engine identify the gene as Legumin 11S globulin. The Panther database has this gene annotated with nutrient reservoir activity.

## Sheet: Supp_Tab_2
Supplemental Table2. All differentially expressed transcripts with average normalized read count and standard error for each genotype/condition across biological replicates. Normalized read counts are from DESeq.
Gene ID	Locus Description	Average WT-D read count	WT-D read count standard error	Average WT-R read count	WT-R read count standard error	Average phyA-D read count	phyA-D read count standard error	Average phyA-R read count	phyA-R read count standard error	Figure 2C Venn diagram sector	Module	Overlap with DEPs?
Solyc03g115940	Dof zinc finger protein (C4B6D7_IPOBA)	1633.88	48.3097	2750.43	271.835	887.187	91.3409	1706.17	103.572	E	blue	No
Solyc07g019460	Cytochrome P450 NADPH-reductase (B3RFK3_PETHY)	5209.22	142.27	7631.56	273.889	3524.92	107.928	5552.81	245.167	E	blue	No
Solyc06g060830	Homeobox-leucine zipper protein (Q40781_PIMBR)	597.518	9.10385	317.265	69.9072	1790.75	132.491	480.405	27.1383	E	blue	No
Solyc09g011160	Regulator of chromosome condensation RCC1 (B8FLG8_DESAA)	39.7711	8.95865	117.137	28.2438	123.273	16.4709	1049.75	51.7	E	brown	No
Solyc07g015800	F-box family protein (B9HV09_POPTR)	556.608	24.5529	819.151	66.0384	391.048	14.4085	518.902	15.0089	E	turquoise	No
Solyc08g067320	Chlorophyll a/b binding protein (Q41422_SOLTU)	357.426	15.8532	707.918	44.3291	159.26	18.5264	339.03	10.0093	E	blue	No
Solyc08g066510	GATA transcription factor 9 (B6STZ1_MAIZE)	167.881	10.5032	108.203	15.7695	493.988	18.0325	181.464	9.80164	E	blue	No
Solyc02g080160	Xyloglucan endotransglucosylase/hydrolase 1 (C0IRG0_9ERIC)	857.699	11.1398	640.91	7.97809	1172.53	72.071	804.961	37.4856	E	blue	No
Solyc06g010030	MLO-like protein 3 (C6EWE6_VITVI)	455.237	13.6709	707.456	43.7225	326.729	45.0721	486.712	45.2593	E	pink	No
Solyc11g010170	LanC-like protein 2 (B6TCV9_MAIZE)	446.276	37.4768	670.052	21.458	657.902	24.8837	1224.66	64.9453	E	brown	No
Solyc04g015220	Nbs-lrr, resistance protein	925.265	37.2272	1317.28	36.2195	561.208	15.28	854.489	94.6302	E	turquoise	No
Solyc06g008580	Auxin responsive protein (D9IQE6_CATRO)	298.87	12.8446	179.299	19.5563	210.807	12.845	99.5575	9.78671	E	Not in top 8000 most variable DETs	No
Solyc07g051890	Protein serine/threonine kinase (D3BP85_POLPA)	74.1973	2.61425	168.222	15.1193	3.46645	1.05617	53.59	5.94108	E	Not in top 8000 most variable DETs	No
Solyc12g019230	Polygalacturonase 1 (O22311_SOLLC)	97.7904	4.26749	46.7991	10.5251	17.3032	5.33789	4.9139	1.5956	E	Not in top 8000 most variable DETs	No
Solyc05g050220	G-box binding factor 3 (D7LDY1_ARALY)	305.419	14.3915	510.281	50.3142	109.878	9.58316	358.581	6.75814	E	blue	No
Solyc06g063280	CONSTANS-like zinc finger protein (D0EP07_SOYBN)	23.938	2.62882	69.2916	8.76968	3.57192	0.605481	20.7818	3.1677	E	Not in top 8000 most variable DETs	No
Solyc08g016080	NAD-dependent epimerase/dehydratase (B3ECK3_CHLL2)	727.812	16.8245	1222.15	57.18	219.399	16.9202	698.541	18.8959	E	blue	No
Solyc10g076660	Anthocyanidin synthase (Q2QCX4_GOSHI)	93.4543	11.6052	197.795	16.3178	142.656	11.0442	263.957	15.8005	E	Not in top 8000 most variable DETs	No
Solyc07g063410	NAC domain protein IPR003441 (B9HZY3_POPTR)	355.936	9.11478	565.111	50.1882	250.459	18.2671	359.631	18.0271	E	blue	No
Solyc03g121240	BHLH transcription factor-like (Q8S0N2_ORYSJ)	579.919	31.9799	382.692	25.9633	773.316	50.9094	505.617	24.7409	E	blue	No
Solyc01g109700	Transcription factor (D6MKM4_9ASPA)	1251.14	38.9151	909.098	84.3305	1896.94	57.3413	1165.89	46.0349	E	blue	No
Solyc07g007270	Unknown Protein	170.277	4.67455	97.3752	8.66004	100.771	5.05665	45.0411	5.89244	E	Not in top 8000 most variable DETs	No
Solyc03g006220	Os06g0207500 protein (Fragment) (Q0DDQ9_ORYSJ)	518.153	11.0469	378.636	14.3452	385.391	26.1178	269.95	11.6281	E	turquoise	No
Solyc03g031860	Phytoene synthase 1 (manually curated)	2145.48	66.5686	3355.53	261.541	411.779	25.3951	1624.27	74.295	E	blue	No
Solyc02g066970	Unknown Protein; contains Interpro domain(s) IPR001092 Basic helix-loop-helix dimerisation region bHLH	97.655	6.29939	56.8361	3.88431	161.599	13.6064	87.3244	9.64168	E	Not in top 8000 most variable DETs	No
Solyc06g035490	BHLH transcription factor-like (Q941Z7_ORYSJ)	288.81	21.1501	438.286	10.1016	159.206	10.4382	316.673	40.2181	E	blue	No
Solyc07g053620	DnaJ like protein (t19-8 gene) (manually curated)	486.969	25.1762	712.188	39.0598	618.135	31.4681	999.099	17.8684	E	brown	No
Solyc05g052980	Protein phosphatase 2C (Q8RVG0_TOBAC)	1290.7	66.0935	1880.54	181.706	941.408	42.939	1581	23.1416	E	blue	No
Solyc01g008640	Cytochrome P450	279.21	11.2606	448.023	31.5778	195.406	10.6869	277.099	15.1461	E	blue	No
Solyc07g043130	Os12g0117400 protein (Fragment) (Q0IQJ6_ORYSJ)	3469.33	152.792	6724.14	792.921	667.857	40.5053	2951.46	94.3972	E	blue	No
Solyc08g082210	AP2/EREBP transcription factor (manually curated)	485.899	30.5009	776.723	38.573	116.581	33.5721	401.154	33.4345	E	blue	No
Solyc09g083390	Genomic DNA chromosome 5 TAC clone K9D7 (Q9FIX7_ARATH)	1410.95	49.8754	3097.69	406.468	230.729	38.5068	1320.19	42.0077	E	blue	No
Solyc11g066060	heat shock protein (B2D2G5_CAPSN)	8682.29	233.418	12036.9	717.254	11821.6	941.136	16908.5	714.483	E	brown	No
Solyc08g079700	Zinc finger A20 and AN1 domain-containing stress-associated protein 7 (SAP7_ARATH)	313.274	27.5944	446.773	19.4778	469.718	19.5214	939.33	47.6694	E	brown	No
Solyc11g008250	Single-stranded nucleic acid binding R3H domain protein (B4B323_9CHRO)	910.514	36.7199	1441.26	114.438	514.443	28.1432	939.645	62.6935	E	blue	No
Solyc06g051940	Protein phosphatase 2C (A1IGC7_TOBAC)	103.56	9.14955	347.66	108.528	333.631	45.0176	647.307	45.5951	E	greenyellow	No
Solyc03g044910	GNS1/SUR4 membrane family protein (D7MBD4_ARALY)	710.083	30.8197	900.626	62.1308	524.943	18.5974	680.772	14.9722	E	blue	No
Solyc01g109780	Unknown Protein	1080.95	47.5607	1297.62	49.8079	630.647	7.0656	972.464	35.6323	E	blue	No
Solyc04g078840	AREB (manually curated)	1602.26	60.4844	2087.28	129.365	1050.66	78.7266	1667.17	49.6722	E	blue	No
Solyc12g008840	beta-galactosidase 4 (manually curated)	1117.8	45.2597	1519.39	47.3426	1754.07	99.5911	1141.87	126.702	E	yellow	No
Solyc06g035760	Cytochrome P450	1358.86	57.5454	1022.43	90.069	550.852	20.193	395.375	19.8084	E	turquoise	No
Solyc03g007650	Chaperone protein dnaJ 3 (DNAJ3_ARATH)	123.071	5.89728	171.081	10.358	177.22	2.26143	316.458	10.7771	E	Not in top 8000 most variable DETs	No
Solyc03g007370	RNA polymerase sigma factor (C7QR23_CYAP0)	531.881	38.8471	1434.84	291.741	106.477	11.4913	687.659	55.1127	E	blue	No
Solyc05g007010	Glyoxal oxidase (B6TJK4_MAIZE)	104.273	5.33079	67.9344	2.04528	151.944	7.82085	102.714	5.18312	E	Not in top 8000 most variable DETs	No
Solyc11g012360	Sodium-dependent dicarboxylate transporter (O35055_RAT)	2137.16	32.7664	3398.89	445.112	1121.68	34.1401	2468.8	172.437	E	blue	No
Solyc07g007560	Vesicular glutamate transporter 3 (B5AU16_DANRE)	375.089	15.684	514.11	38.0239	243.029	13.4612	402.802	13.5029	E	blue	No
Solyc01g107460	Unknown Protein	27.4571	1.6324	62.8476	5.88197	1.45252	0.800085	7.23744	1.43969	E	Not in top 8000 most variable DETs	No
Solyc03g006620	Cotton fiber expressed protein 1 (O81373_GOSHI)	203.379	11.5866	391.874	104.373	74.8575	5.62554	177.657	10.111	E	blue	No
Solyc07g043230	Low affinity zinc transporter (A3LU47_PICST)	164.383	7.99758	254.281	33.1953	80.8783	9.27133	147.771	8.79726	E	Not in top 8000 most variable DETs	No
Solyc03g031590	C4-dicarboxylate transporter/malic acid transport family protein (D7KUS7_ARALY)	189.648	6.50618	129.571	6.388	87.8586	7.88839	38.2468	4.56532	E	Not in top 8000 most variable DETs	No
Solyc12g013620	jasmonic acid 2 (manually curated)	230.765	17.7405	406.367	67.7906	58.3106	7.28338	164.869	9.49853	E	blue	No
Solyc07g032380	Pentatricopeptide repeat-containing protein (D7M4J8_ARALY)	1447.03	28.2253	1772.07	28.8954	615.687	50.5201	1015.15	22.6947	E	blue	No
Solyc12g096500	CONSTANS-like protein (Q0MQL9_SOLTU)	1674.08	35.7898	2108.71	109.736	643.934	32.2369	1475.44	44.2482	E	blue	No
Solyc11g068940	U-box domain-containing protein 24 (D7LAS1_ARALY)	121.678	10.3194	245.538	53.3479	70.1818	5.45072	139.891	11.0862	E	Not in top 8000 most variable DETs	No
Solyc02g062690	Transcription factor (D6MKM4_9ASPA)	1377.54	20.3508	1088.91	4.62376	951.191	60.4551	657.17	22.5875	E	brown	No
Solyc03g005900	GDSL esterase/lipase At5g45670 (GDL82_ARATH)	1258.15	57.8416	1012.89	12.1155	819.841	48.1683	615.694	28.8463	E	brown	No
Solyc12g019740	Thioredoxin family protein (D7KIT3_ARALY)	1347.77	60.6865	1827.16	181.315	816.029	65.8576	1281.64	62.1582	E	blue	No
Solyc05g015840	Squamosa promoter binding protein 13 (manually curated)	501.325	20.315	713.972	63.9361	208.049	11.9319	434.423	17.813	E	blue	No
Solyc06g073940	Unknown Protein	1053.26	59.1923	1322.36	46.1938	462.081	15.7918	990.9	34.6169	E	blue	No
Solyc11g072110	1-AMINOCYCLOPROPANE-1-CARBOXYLATE OXIDASE-like protein (Q94CL5_ARATH)	1257.07	23.0932	1572.81	65.6739	348.479	32.0454	1861.81	46.087	E	blue	No
Solyc09g011870	Prephenate dehydrogenase family protein (D7KDI5_ARALY)	229.186	25.1149	560.659	161.111	68.6584	15.204	209.874	30.9198	E	blue	No
Solyc09g082980	Plant-specific domain TIGR01615 family protein (B6TMA8_MAIZE)	3157.43	143.582	4217.92	295.823	1864.28	177.04	3154.71	150.307	E	blue	No
Solyc08g066310	Receptor like kinase, RLK	60.6473	1.88123	108.832	15.7714	13.5447	2.51329	52.3003	3.71753	E	Not in top 8000 most variable DETs	No
Solyc12g096770	Hydroxycinnamoyl CoA quinate transferase (D6BK25_CYNSC)	16.6563	1.09496	52.7391	6.11184	39.7289	6.44863	124.062	31.8797	E	Not in top 8000 most variable DETs	No
Solyc08g078700	mitochondrial small heat shock protein (manually curated)	884.335	248.949	410.41	100.246	331.125	14.1026	1123.98	31.6206	E	green	No
Solyc04g016230	Glucosyltransferase (D7URL8_9LAMI)	1346.68	54.6702	1856.23	142.527	794.761	69.0364	1096.78	92.9681	E	blue	No
Solyc12g057070	UDP-glucuronosyltransferase (Q5UB81_ARATH)	658.629	4.10205	911.415	34.0156	892.124	20.4507	1414.65	59.5928	E	brown	No
Solyc12g100270	CER1 (B6TFH3_MAIZE)	1008.82	109.252	2125.83	165.372	1360.02	233.974	1605.66	230.694	O	pink	No
Solyc02g090450	Peroxidase (Q58GF4_9ROSI)	52.8462	10.2096	95.0199	3.64987	75.4732	10.5736	104.53	6.71988	O	Not in top 8000 most variable DETs	No
Solyc01g096450	Aspartic proteinase nepenthesin-1 (B6TDX6_MAIZE)	14512.5	402.013	10395.3	506.787	12747.4	575.951	11960.2	379.056	O	green	No
Solyc03g083560	Expressed protein (Fragment) (B3VJP0_POPTN)	1203.13	53.8191	882.132	21.1469	1051.67	40.7832	970.843	72.3675	O	grey	No
Solyc09g090680	Cysteine-rich repeat secretory protein 3 (CRR3_ARATH)	307.755	10.4266	214.452	13.8845	266.324	13.9173	238.76	11.6685	O	Not in top 8000 most variable DETs	No
Solyc06g051130	Transferase family protein (D7LEH4_ARALY)	258.456	20.1329	173.341	9.96035	249.97	13.9389	180.087	9.19677	O	Not in top 8000 most variable DETs	No
Solyc07g052680	Unknown Protein	136.748	10.3839	81.1545	6.86662	102.324	7.6333	79.5023	4.31171	O	Not in top 8000 most variable DETs	No
Solyc05g005490	carbonic anhydrase (manually curated)	1112.55	27.4395	1470.29	109.203	1346.94	36.2023	1505.78	66.3038	O	grey	No
Solyc06g076760	Laccase 1a (B9IG56_POPTR)	28.1542	2.49724	7.13412	0.883842	0.870249	0.536479	6.01786	1.23978	O	Not in top 8000 most variable DETs	No
Solyc01g110180	Zinc finger protein CONSTANS-LIKE 1 (COL1_ARATH)	1081.55	42.9228	574.389	73.6631	769.912	147.566	555.282	43.3491	O	turquoise	No
Solyc01g103650	Hydrolase alpha/beta fold family (A4VRL9_PSEU5)	484.53	30.5603	908.448	55.1473	487.061	71.9519	703.971	70.9033	O	pink	No
Solyc02g093830	Glucose-6-phosphate 1-dehydrogenase (Q2XTC4_SOLTU)	2544.51	55.0402	3346.89	113.288	2985.21	91.4009	3437.95	158.352	O	turquoise	No
Solyc07g021620	Pentatricopeptide repeat-containing protein (D7LCN4_ARALY)	480.11	39.9738	356.596	27.2872	390.07	9.80054	432.264	15.3689	O	Not in top 8000 most variable DETs	No
Solyc02g092120	Phytosulfokines 3 (PSK3_ARATH)	16.3666	3.72232	39.4828	9.78197	12.291	2.50754	23.2553	2.07228	O	Not in top 8000 most variable DETs	No
Solyc11g007900	Os03g0107400 protein (Fragment) (Q0DVY2_ORYSJ)	1014.71	23.4914	831.669	34.6652	832.441	23.6978	959.805	6.32805	O	green	No
Solyc03g007110	ATP-dependent Clp protease ATP-binding subunit ClpC (D6KVC7_SCAIO)	2037.85	60.1812	1639.25	57.5566	1921.31	70.345	1873.36	118.66	O	green	No
Solyc01g097920	Cysteine synthase (Q9FSF5_TOBAC)	1326.6	37.5748	1060	46.3756	1243.01	60.6798	1206.99	50.4934	O	green	No
Solyc03g093240	nitric oxide synthase 1 (manually curated)	2526.54	79.6537	2081.55	103.401	2178.02	71.1343	2433.17	99.8228	O	green	No
Solyc07g064060	Breast carcinoma amplified sequence 3 (Fragment) (B1AR77_MOUSE)	1676.27	44.8287	2035.01	62.5545	1762.54	66.2526	1908.82	49.9859	O	green	No
Solyc08g082280	Long-chain-fatty-acid-CoA ligase (B2WS80_ARAHA)	3608.93	107.867	4333.34	206.777	4061.75	104.876	4345.23	135.522	O	turquoise	No
Solyc05g056290	biotin carboxylase carrier (manually curated)	2293.44	152.773	1702.66	77.2993	1976.58	160.585	2088.94	156.693	O	green	No
Solyc09g075180	Cryptochrome DASH family (B5W072_SPIMA)	5692.12	208.375	4487.91	183.749	5080.87	239.761	5258.32	352.823	O	green	No
Solyc04g009530	Glutathione S-transferase (B3TLW0_ELAGV)	804.268	25.7976	610.213	53.4334	650.698	46.3422	675.407	22.0978	O	yellow	No
Solyc04g014760	RHO protein GDP dissociation inhibitor (Q705X3_MEDTR)	1100.26	33.0599	885.966	9.69106	1086.2	27.9785	1015.4	23.3562	O	blue	No
Solyc09g005690	Inositol-1 4 5-trisphosphate 5-Phosphatase-like protein (Q9M1W5_ARATH)	63.0064	8.2966	98.9059	6.37645	55.2469	4.46887	74.3547	3.09145	O	Not in top 8000 most variable DETs	No
Solyc10g076250	Aminotransferase like protein (Q0WWF1_ARATH)	1994.15	83.1602	2401.82	79.0934	2132.39	85.3257	2235.07	61.4352	O	grey	No
Solyc08g014440	CREB-binding protein (Fragment) (Q8QZV8_MOUSE)	353.545	20.1312	480.02	30.1667	379.223	19.5932	407.875	9.23837	O	Not in top 8000 most variable DETs	No
Solyc02g091470	Serine/threonine protein kinase-like (Q9FGC3_ARATH)	856.629	10.2905	1088.89	52.392	982.855	36.3951	946.554	27.5456	O	green	No
Solyc01g106040	GATA transcription factor 25 (B6TFI9_MAIZE)	106.416	2.99241	62.452	11.0669	88.8387	5.42682	82.0454	5.9593	O	Not in top 8000 most variable DETs	No
Solyc03g111100	AtIII18x5-like protein (Fragment) (D9YU68_ARAHA)	255.322	14.323	535.21	126.478	303.923	30.8725	432.862	52.1325	O	black	No
Solyc02g079750	Flavoprotein wrbA (B6U724_MAIZE)	1226.15	25.2191	1544.61	65.7766	1277.48	35.3437	1560.84	77.7633	O	black	No
Solyc02g069180	Protein binding protein (D7L0L7_ARALY)	1381.8	19.3269	1116.51	56.4807	1460.91	61.1181	1259.47	50.7422	O	blue	No
Solyc01g097270	pathogen-induced protein (manually curated)	1439.64	76.2595	2010.59	263.058	1618.63	57.6819	1735.53	67.324	O	grey	No
Solyc06g036440	C4-dicarboxylate transporter/malic acid transport family protein (D7M2F7_ARALY)	69.7455	5.01027	112.014	10.4602	73.2897	7.09146	106.501	10.7518	O	Not in top 8000 most variable DETs	No
Solyc02g087070	alpha-DOX1 (manually curated)	661.354	24.9377	1188.6	186.115	701.472	91.8413	1063.55	130.317	O	black	No
Solyc05g005880	30S ribosomal protein S13 (B6TG65_MAIZE)	5898.25	224.817	4635.28	166.974	4997.64	242.077	5356.81	194.022	O	yellow	No
Solyc04g080160	COP9 signalosome complex subunit 4 (B4FCA4_MAIZE)	814.899	26.2301	673.008	19.0254	789.809	32.0614	777.877	34.1833	O	Not in top 8000 most variable DETs	No
Solyc01g079150	AE family transporter anion exchange (A4RY02_OSTLU)	161.129	8.85026	266.917	54.1518	180.681	14.6915	217.663	17.4647	O	Not in top 8000 most variable DETs	No
Solyc02g090580	Os03g0859900 protein (Fragment) (Q0DLK3_ORYSJ)	888.906	23.7651	725.458	15.6768	804.061	22.8596	866.457	19.2841	O	Not in top 8000 most variable DETs	No
Solyc05g052270	CBL-interacting protein kinase 13 (C4P7W2_VITVI)	871.809	16.2658	1079.49	28.5921	1049.78	50.9737	1141.27	34.7089	O	turquoise	No
Solyc12g011450	Chlorophyll a-b binding protein 13, chloroplastic (CB23_SOLLC)	557.14	54.2913	719.506	40.6694	1173.04	66.5627	1084.81	88.1129	O	blue	No
Solyc05g052710	30S ribosomal protein S31, chloroplastic (RR31_ARATH)	4152.38	60.5928	3236.46	149.861	3647.07	194.789	3830.05	123.45	O	green	No
Solyc10g006030	30S ribosomal protein S10-like (A1YMX4_BRACM)	6483.05	366.236	5016.96	256.11	5747.99	295.784	5900.1	408.26	O	green	No
Solyc06g009190	Pectinesterase (B9SAU4_RICCO)	4239.18	111.549	3380.38	141.057	4177.55	145.88	3582.83	62.1286	O	blue	No
Solyc02g079220	Sugar transporter protein 1 (manually curated)	2126.8	53.0309	2988.49	227.885	2253.24	172.254	2519.19	182.342	O	green	No
Solyc08g074680	partialpolyphenol oxidase A (manually curated)	12732.4	687.737	17215.3	1284.47	15897.3	659.228	19544.6	1592.47	O	turquoise	No
Solyc07g064350	Protein KRI1 homolog (KRI1_BOVIN)	964.799	59.7601	744.646	11.399	1032.17	47.97	902.463	36.6329	O	turquoise	No
Solyc09g014160	UPF0503 protein At3g09070, chloroplastic (U503A_ARATH)	619.267	33.9834	492.122	10.1342	515.646	20.5233	568.603	25.111	O	Not in top 8000 most variable DETs	No
Solyc12g096020	Protein phosphatase 2C (A5A6P8_WHEAT)	883.917	34.4146	1151.23	49.837	977.099	22.5714	1011.84	11.3336	O	green	No
Solyc09g005740	Chloroplast lumen common family protein (D7LUJ6_ARALY)	967.277	66.7363	674.989	54.1872	1060.28	122.623	888.392	75.925	O	turquoise	No
Solyc02g093250	Caffeoyl-CoA O-methyltransferase (A8IFQ7_SOLLC)	1015.13	62.0194	1314.22	52.0582	1150.35	60.9065	1374.93	111.228	O	grey	No
Solyc04g015480	cDNA clone 006-204-H08 full insert sequence (B7E442_ORYSJ)	1228.92	32.9047	956.991	52.1854	1051.72	19.5442	1102.95	49.8314	O	green	No
Solyc07g043310	ob5411-gamma-aminobutyrate transaminase subunit precursor isozyme 1 (manually curated)	1381.84	71.1848	1881.38	90.4559	1652.17	104.047	2214.01	227.448	O	turquoise	No
Solyc07g063930	Solute carrier family 22 member 2 (B5X477_SALSA)	1111.99	26.865	1398.91	76.0877	1279.22	35.5188	1587.09	53.3874	O	brown	No
Solyc00g009080	Unknown Protein	400.69	22.3035	286.308	27.4503	364.555	29.5509	265.721	17.612	O	Not in top 8000 most variable DETs	No
Solyc05g047590	Pectinesterase (C0SPH5_PRUPE)	290.094	14.4772	222.855	3.96043	342.379	18.8133	255.833	10.8996	O	Not in top 8000 most variable DETs	No
Solyc03g115900	Chlorophyll a-b binding protein P4, chloroplastic (CB24_PEA)	791.762	23.7353	1584.96	317.846	921.089	173.193	1287.29	100.146	O	grey	No
Solyc03g118900	Nodulin-like protein (Q9LV20_ARATH)	412.645	23.1193	540.362	13.8859	510.192	31.5004	475.186	20.0081	O	Not in top 8000 most variable DETs	No
Solyc02g065050	Aspartic proteinase nepenthesin I (A9ZMF9_NEPAL)	62.8086	6.64111	101.975	11.6694	76.7669	4.93295	70.1157	2.69411	O	Not in top 8000 most variable DETs	No
Solyc10g007110	Tyrosine aminotransferase (Q8GUE9_SOLSC)	274.022	8.14505	421.258	64.9933	327.666	10.2738	352.328	16.7965	O	Not in top 8000 most variable DETs	No
Solyc07g006760	Serine/threonine protein kinase (C4PKQ3_PRUPE)	1018.46	18.359	1220.38	18.8368	1162.99	68.4956	1351.9	16.7974	O	brown	No
Solyc02g084990	Mannan endo-1 4-beta-mannosidase (A8FDC6_BACP2)	3448.18	37.3435	4102.78	119.369	3828.64	138.879	3507.24	44.1049	O	grey	No
Solyc12g014530	L-aspartate oxidase (D7M6M9_ARALY)	607.431	23.7698	801.5	23.8311	592.276	28.3411	690.786	20.3775	O	blue	No
Solyc12g094660	Cc-nbs-lrr, resistance protein	50.987	5.98376	86.4207	5.76659	67.6126	5.05197	99.8746	6.53564	O	Not in top 8000 most variable DETs	No
Solyc04g083140	cytochrome P450	204.716	24.4671	402.954	56.5403	201.789	38.07	281.722	37.4057	O	pink	No
Solyc03g112940	Serine/threonine-protein kinase ATM (ATM_ARATH)	921.524	20.3505	1227.09	68.4343	977.016	66.5957	1251.9	43.1103	O	black	No
Solyc07g064130	Ubiquitin (Q39257_PEA)	55404.2	2922.57	76083.9	4474.48	52278.5	2540.5	63556.5	2479.93	O	black	No
Solyc04g045540	Ycf1 (Fragment) (A6YA36_9MAGN)	254.827	20.3141	196.642	17.4872	102.138	7.1251	98.5305	7.79543	G	Not in top 8000 most variable DETs	No
Solyc06g051010	Peptide-N4-(N-acetyl-beta-glucosaminyl)asparagine amidase A (B2W0X1_PYRTR)	990.42	20.4783	948.506	53.7949	710.373	40.2132	818.118	25.7802	G	blue	No
Solyc01g105620	RING finger protein (C6EUD3_SOYBN)	62.8736	6.29607	57.4051	5.31133	28.7093	3.81014	35.5472	5.79599	G	Not in top 8000 most variable DETs	No
Solyc09g030450	Receptor like kinase, RLK	454.028	17.7677	366.357	5.936	362.288	8.9565	346.402	14.6966	G	Not in top 8000 most variable DETs	No
Solyc10g083880	tonoplast intrinsic protein 1.3 (manually curated)	3095.61	197.975	4292.35	301.55	4249.48	432.646	3540.09	375.224	G	green	No
Solyc08g014370	CHP-rich zinc finger protein-like (Q9FNE5_ARATH)	196.73	8.61494	191.167	7.70796	125.074	15.957	145.956	9.39444	G	Not in top 8000 most variable DETs	No
Solyc06g071180	Dynein light chain 1 cytoplasmic (Q7RN10_PLAYO)	166.505	9.85429	129.042	4.35123	112.919	9.15577	114.699	4.76065	G	Not in top 8000 most variable DETs	No
Solyc10g078410	F-box family protein (B9GG65_POPTR)	126.059	14.6167	133.906	6.0989	77.4894	6.1074	101.368	9.02141	G	Not in top 8000 most variable DETs	No
Solyc09g075160	60S ribosomal protein L22-2 (D7L3W0_ARALY)	923.3	8.57353	902.065	22.5918	1275.78	65.4615	1072	19.7662	G	turquoise	No
Solyc03g007410	BHLH transcription factor (Q401N4_9LILI)	418.368	34.5822	308.172	29.7455	297.025	11.4655	324.933	10.5807	G	Not in top 8000 most variable DETs	No
Solyc07g063390	Beta-glucosidase (B6SYQ7_MAIZE)	1568.69	23.5023	1731.22	71.8993	1240.15	61.6504	1448.27	45.146	G	turquoise	No
Solyc01g109890	Chaperone protein dnaJ 10 (B6T7D7_MAIZE)	791.252	29.165	657.02	21.7379	541.439	11.4499	591.937	19.1002	G	greenyellow	No
Solyc05g005680	Xyloglucan endotransglucosylase/hydrolase 2 (D5HP44_9ROSA)	199.306	7.89654	212.311	60.8773	329.949	24.1259	220.333	16.2998	G	Not in top 8000 most variable DETs	No
Solyc08g077820	Cationic amino acid transporter (B9HVV3_POPTR)	20.8918	0.864698	14.842	2.36173	7.19586	1.9746	8.99446	1.71987	G	Not in top 8000 most variable DETs	No
Solyc06g068010	Biotin carboxyl carrier protein of acetyl-CoA carboxylase (C6NTC5_9GAMM)	781.103	26.8097	657.064	40.0153	576.208	45.7713	568.805	31.1146	G	turquoise	No
Solyc05g054060	UTP-glucose 1 phosphate uridylyltransferase (B3VDY8_EUCGR)	82.0312	7.25343	85.3367	8.25705	127.354	7.19543	106.388	7.60196	G	Not in top 8000 most variable DETs	No
Solyc09g009180	Chaperone protein dnaJ (C8ZVX3_ENTGA)	1411.59	20.7998	1535.15	26.3372	1802.8	79.0375	1832.33	40.1133	G	turquoise	No
Solyc04g071900	Peroxidase (Q94IQ1_TOBAC)	895.919	17.569	894.761	58.0864	689.879	62.9891	739.747	39.0955	G	turquoise	No
Solyc11g067160	Aldo/keto reductase family protein (D7LJ14_ARALY)	2303.42	68.3105	2088.97	77.361	1707.91	122.997	2156.54	56.9965	G	yellow	No
Solyc10g049660	Transposon protein Mutator sub-class (B6U1M7_MAIZE)	32.7355	3.12037	40.9659	9.43001	67.4773	2.96347	59.7061	4.70144	G	Not in top 8000 most variable DETs	No
Solyc03g007430	Mitochondrial carrier family (C1E2Y0_9CHLO)	338.069	21.1506	397.573	12.8629	445.546	25.9052	448.349	6.75155	G	Not in top 8000 most variable DETs	No
Solyc03g033510	Armadillo/beta-catenin repeat family protein (D7MDH4_ARALY)	153.748	8.28755	156.332	41.0018	270.869	13.1546	188.654	17.798	G	Not in top 8000 most variable DETs	No
Solyc05g009690	Predicted membrane protein (Fragment) (B9HJ03_POPTR)	1164.06	66.7054	1422.47	57.595	1542.85	59.974	1599.07	48.9282	G	turquoise	No
Solyc03g044050	Unknown Protein; contains Interpro domain(s) IPR016027 Nucleic acid-binding, OB-fold-like	25.0338	2.4945	16.2317	1.66037	9.68967	2.71032	8.58	2.1727	G	Not in top 8000 most variable DETs	No
Solyc09g011920	uncoupling protein AF472619 (manually curated)	878.619	31.7118	871.767	37.7085	1310.76	122.237	1011.61	70.8487	G	turquoise	No
Solyc09g055570	Receptor like kinase, RLK	2725.02	28.8709	2756.35	39.7027	1971.84	127.1	2334.83	154.702	G	turquoise	No
Solyc07g045180	CONSTANS-like zinc finger protein (D0EP07_SOYBN)	358.867	12.4369	257.402	41.692	234.682	22.539	281.459	15.0156	G	Not in top 8000 most variable DETs	No
Solyc08g077920	Isocitrate dehydrogenase (Q17P79_AEDAE)	1855.93	54.5471	1982.45	41.8966	2296.39	100.784	2201	26.5362	G	turquoise	No
Solyc01g110560	Small auxin up-regulated RNA3 (manually curated)	85.2265	9.03161	103.395	15.6696	128.924	12.8841	100.285	1.17115	G	Not in top 8000 most variable DETs	No
Solyc11g007870	Self-pruning interacting protein 1 (Q9FR57_SOLLC)	14.0478	2.33684	24.2438	4.82425	41.8859	11.834	35.6027	4.15651	G	Not in top 8000 most variable DETs	No
Solyc01g005240	Aspartokinase (B9RGY9_RICCO)	2246.9	117.891	2365.45	85.0175	2911.18	99.4546	2712.68	120.857	G	turquoise	No
Solyc08g066580	Nuclear pore complex protein Nup85 (NUP85_MOUSE)	1221.97	22.6452	1238.72	39.0096	1521.65	45.1993	1433.35	26.9005	G	turquoise	No
Solyc10g054570	V-type proton ATPase 16 kDa proteolipid subunit (VATL_SOLLC)	884.786	40.3251	935.978	42.8635	1235.11	58.694	1020.13	48.0011	G	turquoise	No
Solyc12g006040	Nbs, resistance protein fragment	39.6686	3.35555	39.2227	4.07799	16.897	1.63864	26.8004	1.00503	G	Not in top 8000 most variable DETs	No
Solyc06g053330	DNA-directed RNA polymerase I subunit rpa49 (RPA49_DICDI)	888.912	14.2504	888.875	43.7242	1112.46	23.9937	1013.57	28.5864	G	turquoise	No
Solyc06g083490	Tropinone reductase-like protein 16 (B2BXZ1_9BRAS)	3431.56	154.821	3618.56	269.801	5264.48	324.878	4271.41	236.385	G	turquoise	No
Solyc07g007130	NHL repeat-containing protein (D7M6N9_ARALY)	270.917	37.8985	221.905	22.952	125.5	9.76122	181.144	11.3608	G	Not in top 8000 most variable DETs	No
Solyc12g009260	3-oxoacyl-(Acyl-carrier-protein) synthase II (Q9Z6Z0_CHLPN)	300.1	31.2561	240.95	4.60354	161.354	11.5721	183.37	14.574	G	Not in top 8000 most variable DETs	No
Solyc02g085630	Homeobox-leucine zipper-like protein (Q3HRT1_PICGL)	20.4427	5.03487	15.2068	3.67538	5.61374	1.34769	13.9614	4.35244	G	Not in top 8000 most variable DETs	No
Solyc08g007990	RNA-binding protein NOB1 (C1C2G7_9MAXI)	2618.24	118.397	2910.95	49.8422	3162.78	139.294	3284.28	168.595	G	turquoise	No
Solyc11g012470	Heterogeneous nuclear ribonucleoprotein A3 (B6TGB9_MAIZE)	2383.33	99.8637	2677.26	81.3889	2906.21	77.159	2494.31	77.4781	G	yellow	No
Solyc09g075400	Unknown Protein	26.0001	5.4032	23.3005	1.89194	76.8267	12.7266	41.2908	9.43164	G	Not in top 8000 most variable DETs	No
Solyc07g066610	Phosphoglycerate kinase (O81394_SOLTU)	21909.1	313.187	19550.4	831.87	16792.1	981.738	19470	921.498	G	yellow	No
Solyc06g061050	TOM2B (B6TGV7_MAIZE)	2578.76	197.796	2412.37	91.4174	2050.01	146.603	2212.2	99.1338	G	turquoise	No
Solyc01g010660	Receptor-like protein kinase At3g21340 (RLK6_ARATH)	527.36	8.31621	472.271	31.397	400.721	9.43133	468.426	11.7697	G	Not in top 8000 most variable DETs	No
Solyc02g090990	Serine/threonine-protein kinase 36 (STK36_PONAB)	15.6345	1.37984	25.7393	0.835243	34.5862	6.29812	28.9394	5.03742	G	Not in top 8000 most variable DETs	No
Solyc01g099760	LeMA-1 putatve Mg-dependent ATPase 1 (manually curated)	4209.88	119.789	4673.6	127.657	5389.19	184.981	5396.32	119.392	G	turquoise	No
Solyc06g050870	Hypoxia induced protein conserved region containing protein expressed (Q2QYP0_ORYSJ)	5.86563	1.5531	8.65751	3.69279	59.1364	18.5427	15.4703	9.56327	G	Not in top 8000 most variable DETs	No
Solyc12g044280	Photosystem I reaction center subunit VI, chloroplastic (PSAH_SPIOL)	741.588	30.0579	554.387	76.8359	358.665	95.3397	487.612	41.0137	G	yellow	No
Solyc11g067330	Acyltransferase (Fragment) (C1JZ69_DATST)	145.897	7.93315	195.65	42.908	236.921	8.96537	194.606	17.8327	G	Not in top 8000 most variable DETs	No
Solyc02g069600	Cytochrome P450	129.802	2.8358	115.386	14.7865	82.1092	9.09139	90.417	12.6334	G	Not in top 8000 most variable DETs	No
Solyc01g009080	FHA domain containing protein (B6TP39_MAIZE)	475.087	11.2682	432.819	11.2899	354.894	35.1082	401.247	11.1886	G	Not in top 8000 most variable DETs	No
Solyc11g067300	Lipid A export ATP-binding/permease protein msbA (MSBA_CHRVO)	241.258	17.8704	283.245	53.0293	411.397	31.0513	355.682	48.5178	G	turquoise	No
Solyc01g087440	Protein EFR3 homolog B (EFR3B_DANRE)	149.16	7.82398	191.259	35.1633	237.849	18.8825	238.429	11.4698	G	Not in top 8000 most variable DETs	No
Solyc12g009600	Thylakoid lumenal protein (B6SU36_MAIZE)	1294.31	28.5139	1089.87	43.4442	945.489	98.0437	927.284	92.4126	G	turquoise	No
Solyc02g079950	photosystem II oxygen-evolving complex protein 3 (manually curated)	9776.57	660.368	8158.23	941.562	5425.48	1196.86	6144.55	457.865	G	yellow	No
Solyc05g005190	ADP-ribosylation factor (Q76ME3_WHEAT)	4506.94	263.775	4816.17	155.177	5833	253.039	5634.55	214.68	G	turquoise	No
Solyc05g032660	Dehydrogenase/ reductase 3 (Q3INM6_NATPD)	1702.99	72.9207	1539.66	55.3917	1213.26	104.544	1389.37	39.2819	G	yellow	No
Solyc10g078490	ripening-related mRNA (manually curated)	534.456	27.5204	674.047	17.6507	730.915	7.42971	756.663	39.4051	G	greenyellow	No
Solyc07g043390	Cellulose synthase family protein expressed (Q339N6_ORYSJ)	1145.73	102.97	1607.12	419.629	2096.88	155.038	1969.5	170.313	G	turquoise	No
Solyc05g056040	Auxin Response Factor 24 (manually curated)	526.336	24.5742	531.16	55.6032	349.231	16.0742	441.973	28.8789	G	turquoise	No
Solyc03g043880	SlBCAT4 (manually curated)	76.2368	2.69437	77.1528	6.81593	125.984	10.5625	98.4134	7.865	G	Not in top 8000 most variable DETs	No
Solyc06g075780	Cys2/His2 zinc-finger transcription factor (Q4U318_SILLA)	736.966	27.107	712.763	66.6395	581.28	21.6027	660.936	20.2014	G	blue	No
Solyc09g074250	Receptor-like kinase (A7VM42_MARPO)	145.255	8.50071	116.923	3.42478	70.726	4.99546	85.0388	4.56078	G	Not in top 8000 most variable DETs	No
Solyc04g005270	Phosphatidylinositol kinase (D0MQD8_PHYIN)	3888.92	94.2049	4655.33	406.468	4963.78	205.868	5203.67	114.493	G	turquoise	No
Solyc12g006680	Early nodulin 93 protein (A3FGC9_9ROSI)	4.15392	0.62939	9.58256	6.08439	77.7722	22.2331	25.424	13.9683	G	Not in top 8000 most variable DETs	No
Solyc02g063480	Xylanase inhibitor (Fragment) (Q53IQ4_WHEAT)	91.8645	11.3045	125.347	16.4265	214.094	30.4197	187.954	42.3235	G	Not in top 8000 most variable DETs	No
Solyc12g005600	Wound-responsive protein-related (A8IXM2_BRACM)	0	0	0	0	33.1674	12.673	5.77678	4.09676	G	Not in top 8000 most variable DETs	No
Solyc11g009020	HAD-superfamily hydrolase subfamily IA variant 3 containing protein expressed (Q10I42_ORYSJ)	1018.57	32.6671	852.093	43.6487	783.528	65.7409	865.813	22.6887	G	yellow	No
Solyc12g011030	xyloglucan endotransglucosylase-hydrolase 9 (manually curated)	5586	133.705	6697.11	1463.38	8438.11	629.584	8974.01	281.702	G	turquoise	No
Solyc03g122320	Unknown Protein	8.78649	1.17234	16.9816	7.19161	36.5298	4.99255	22.8221	1.67137	G	Not in top 8000 most variable DETs	No
Solyc09g098270	Polygalacturonase (Q9SLP3_CUCSA)	120.312	7.53424	105.958	11.1982	79.6841	7.2077	88.5477	5.5014	G	Not in top 8000 most variable DETs	No
Solyc05g012450	Dehydration-responsive family protein (D7LDR4_ARALY)	1371.19	25.044	1441.16	80.9242	1687.29	59.8316	1571.36	20.4042	G	turquoise	No
Solyc06g076790	Unknown Protein	946.86	63.9846	808.365	122.017	598.308	58.3996	796.137	46.9945	G	yellow	No
Solyc02g014860	Chaperone protein DnaJ (D2QAE1_BIFDB)	240.186	0.920151	113.242	53.1377	99.5325	14.433	112.474	3.30209	G	Not in top 8000 most variable DETs	No
Solyc08g082310	RING finger protein (C6EUD3_SOYBN)	189.974	10.0427	201.712	12.8047	125.357	6.522	153.768	12.4974	G	Not in top 8000 most variable DETs	No
Solyc02g090030	33 kDa oxygen-evolving protein (manually curated)	10047.6	534.637	8761.39	660.865	5603.87	964.193	6913.47	335.666	G	yellow	No
Solyc01g099210	Lipoxygenase (Q0ZDG1_ACTDE)	158.093	6.6004	187.417	7.57626	229.339	16.9859	213.278	9.20247	G	Not in top 8000 most variable DETs	No
Solyc10g085190	Anthocyanidin synthase (Q2EGB7_MALDO)	276.556	12.2998	232.631	22.0853	167.17	8.46228	177.644	8.00206	G	Not in top 8000 most variable DETs	No
Solyc03g120640	Photosystem I reaction center subunit VI-1, chloroplastic (PSAH1_ARATH)	7257.1	37.7129	6164.37	207.503	4735.78	481.088	5332.62	82.3976	G	yellow	No
Solyc01g079790	ADP-glucose pyrophosphorylase large subunit 3 (manually curated)	2068.83	23.0572	1758.28	83.2647	1473.76	91.4869	1741.26	64.0459	G	yellow	No
Solyc10g086580	Ribulose-1 5-bisphosphate carboxylase/oxygenase activase 1 (Q9AXG1_GOSHI)	20343.3	1300.76	16919.7	1356.85	11887.7	1308.59	14543.6	480.512	G	yellow	No
Solyc06g074710	Hydroxycinnamoyl CoA shikimate/quinate hydroxycinnamoyltransferase-like protein (Fragment) (B9GF60_POPTR)	37.4512	6.1406	52.6393	11.4691	68.6809	7.62142	58.2694	4.46976	G	Not in top 8000 most variable DETs	No
Solyc11g066110	Inner membrane protein oxaA (B9L0L4_THERP)	5191.83	162.114	4664.6	212.813	4231.29	272.88	5035.65	124.7	G	yellow	No
Solyc09g091530	Salicylic acid carboxyl methyltransferase (C3VIX6_9ASTR)	113.526	10.5166	98.1157	20.6121	45.1667	5.263	61.3753	12.614	G	Not in top 8000 most variable DETs	No
Solyc05g055420	Exostosin-2 (Q0IFF4_AEDAE)	758.41	28.2801	877.623	77.4015	1100.26	22.9262	970.975	34.5436	G	turquoise	No
Solyc02g094120	sulfite oxidase (manually curated)	2821.53	90.6294	3001.51	29.1729	3675.59	205.642	3464.17	189.547	G	purple	No
Solyc08g080560	Unknown Protein	2616.35	109.745	3110.28	182.518	3786.94	240.311	3015.49	90.5226	G	yellow	No
Solyc08g075080	Ring finger protein 12 (Q4V889_RAT)	684.519	39.4098	693.281	34.6581	905.847	58.9801	807.812	40.5478	G	turquoise	No
Solyc03g031920	Yellow stripe-like protein 2.1 (Fragment) (B4ZYE4_BRAJU)	1181.83	31.9451	1440.61	86.4311	1543.24	17.6849	1356.53	61.5925	G	grey	No
Solyc01g096660	Genomic DNA chromosome 5 P1 clone MOJ9 (Q9FL44_ARATH)	1823.73	50.4943	1821.37	56.6293	1458.71	150	1722.78	18.5257	G	yellow	No
Solyc09g091510	chalcone synthase 1 (manually curated)	64.6142	10.4428	34.9752	19.5602	10.8871	2.93947	24.6326	2.15951	G	Not in top 8000 most variable DETs	No
Solyc03g044270	tRNA-dihydrouridine synthase 1-like protein (D3BAF6_POLPA)	450.842	16.4498	506.006	12.6509	609.747	34.4183	593.513	20.1315	G	Not in top 8000 most variable DETs	No
Solyc10g049640	Amino acid permease (Fragment) (B8C3S3_THAPS)	188.789	9.8106	185.88	13.421	299.725	7.04923	227.462	14.0187	G	Not in top 8000 most variable DETs	No
Solyc01g079580	DNAJ heat shock N-terminal domain-containing protein (D7LGN0_ARALY)	2411.17	54.9924	2660.83	246.044	3029.48	112.469	2737.41	97.9643	G	turquoise	No
Solyc05g032880	50S ribosomal protein L9 (D6SS62_9DELT)	453.245	16.837	419.236	10.5179	578.9	29.7109	514.454	16.5092	G	Not in top 8000 most variable DETs	No
Solyc07g039200	Guanine nucleotide-binding protein subunit beta (GBB_ARATH)	1109.05	25.1969	1140.33	32.8538	1410.31	53.5854	1326.05	44.2415	G	turquoise	No
Solyc12g008520	Calmodulin-binding family protein (Q9ZU28_ARATH)	97.4393	7.92747	67.86	8.39138	58.7604	8.84655	62.4746	3.07373	G	Not in top 8000 most variable DETs	No
Solyc01g094790	Cysteine synthase (Q9FS29_SOLTU)	422.633	8.23339	319.59	14.8341	298.275	28.9694	272.294	19.5398	G	Not in top 8000 most variable DETs	No
Solyc01g108680	Hydrolase alpha/beta fold family protein (D7LG04_ARALY)	176.327	27.5342	285.696	62.4137	414.239	10.3155	318.089	34.1239	G	blue	No
Solyc02g069770	Guanine nucleotide-binding protein subunit beta-like protein (GBLP_CHLRE)	297.955	4.32003	285.499	5.50357	402.024	25.5423	327.969	10.1676	G	Not in top 8000 most variable DETs	No
Solyc09g092430	Selenium binding protein (Q93WS1_MEDSA)	5131.47	294.241	6041.95	341.322	6706.97	234.031	6595.92	454.805	G	turquoise	No
Solyc05g046360	Cell differentiation protein rcd1 (B6TTL6_MAIZE)	5.97615	1.13111	9.5058	3.8539	16.6015	0.851992	19.7567	4.04169	G	Not in top 8000 most variable DETs	No
Solyc02g084410	Glyoxalase (B4ERW1_WHEAT)	6.38079	0.723495	10.3349	2.54591	20.0602	5.43534	22.6504	3.80115	G	Not in top 8000 most variable DETs	No
Solyc02g080540	ATP synthase gamma chain (B7FIR4_MEDTR)	6972.25	152.597	5867.34	377.963	5007.49	329.412	5863.53	283.137	G	yellow	No
Solyc04g011580	mRNA binding protein Pumilio 2 (C1GCQ9_PARBD)	1769.85	15.1246	1985.7	86.3987	2232.61	135.036	2190.97	64.1589	G	turquoise	No
Solyc03g098290	Sucrose synthase (Q9FHU4_ARATH)	651.248	19.5663	618.118	41.2338	452.483	16.5136	524.733	55.3974	G	turquoise	No
Solyc09g009760	Z-box binding factor 2 protein (Q5K1L6_ARATH)	7.59906	1.15782	16.5557	2.21686	43.1026	17.2915	24.5836	9.2376	G	Not in top 8000 most variable DETs	No
Solyc12g056830	ATP synthase delta subunit (Q7XYM8_BIGNA)	8949.21	534.733	7298.53	312.644	5745.77	460.718	6649.21	181.488	G	yellow	No
Solyc06g075090	Lysine decarboxylase-like protein (B6TE71_MAIZE)	55.6872	7.62919	83.6359	18.3033	105.519	7.3215	107.703	2.86769	G	Not in top 8000 most variable DETs	No
Solyc03g122330	Unknown Protein	18.1521	4.01327	30.986	10.0514	50.4466	1.82896	32.6395	3.11734	G	Not in top 8000 most variable DETs	No
Solyc06g007430	CBL-interacting protein kinase 11 (C4P7W0_VITVI)	516.53	18.2899	590.422	18.0466	685.148	52.9861	588.658	40.6531	G	purple	No
Solyc04g080260	Glucan endo-1 3-beta-glucosidase 7 (B6T289_MAIZE)	1184.27	29.9196	1280.54	94.1293	892.17	65.1208	1115.83	62.1437	G	turquoise	No
Solyc02g079520	Calcium-binding EF hand family protein (Fragment) (D7MEH5_ARALY)	73.8269	6.91201	76.1408	9.83552	25.126	5.92715	46.2372	7.92463	G	Not in top 8000 most variable DETs	No
Solyc02g072040	Os05g0272200 protein (Fragment) (Q0DJJ5_ORYSJ)	34.8081	2.59952	45.068	2.51962	70.5756	6.72277	56.5374	4.14246	G	Not in top 8000 most variable DETs	No
Solyc04g049840	CCR4-NOT transcription complex subunit 4 (Q5BKS6_XENTR)	1121.53	40.814	1068.5	55.5423	888.025	32.418	958.586	12.276	G	turquoise	No
Solyc04g050470	Genomic DNA chromosome 5 P1 clone MNJ8 (Q9FHS9_ARATH)	767.891	29.9107	745.354	20.4405	540.112	53.0744	632.486	22.6736	G	turquoise	No
Solyc03g019660	Thylakoid lumenal 17.9 kDa protein, chloroplastic (TL1Y_ARATH)	301.226	9.44236	225.308	23.6239	172.389	12.043	213.96	8.01143	G	Not in top 8000 most variable DETs	No
Solyc07g005510	Omega-6 fatty acid desaturase (D7MBK3_ARALY)	2762.24	130.876	2380.56	77.9934	2097.62	90.135	2372.7	51.431	G	yellow	No
Solyc11g069340	Zinc finger transcription factor 69 (manually curated)	1896.41	67.0179	2060.58	38.6422	2329.92	150.182	2441.74	105.928	G	turquoise	No
Solyc02g088760	50S ribosomal protein L12-2 (B6SHT7_MAIZE)	1383.49	63.6589	1306.69	24.6092	1692.9	12.4498	1538.25	28.2111	G	turquoise	No
Solyc06g005910	Tubulin beta chain (B9GWG9_POPTR)	79.0541	6.54439	120.368	14.7247	155.795	15.2727	161.758	8.86574	G	Not in top 8000 most variable DETs	Yes
Solyc01g111590	Histone-binding protein RBBP7 (B5X3G4_SALSA)	271.197	15.2657	247.236	11.9349	425.178	37.8389	331.29	33.9186	G	turquoise	No
Solyc06g069570	SNAP25 homologous protein SNAP33 (SNP33_ARATH)	912.865	33.7187	928.685	47.9535	659.45	13.0479	801.547	31.5241	G	blue	No
Solyc02g078160	Plant-specific domain TIGR01615 family protein (B6UDN7_MAIZE)	412.509	3.86304	400.542	10.1516	274.331	10.1289	317.482	44.3991	G	Not in top 8000 most variable DETs	No
Solyc04g082970	Os03g0859900 protein (Fragment) (Q0DLK3_ORYSJ)	931.587	37.5091	877.484	39.0971	697.617	15.8675	818.96	30.2004	G	blue	No
Solyc03g095620	ABC-1 domain protein (A1TWJ2_MARAV)	1193.84	49.621	1164.02	80.4386	948.544	52.3673	1097.17	23.9055	G	yellow	No
Solyc06g035580	Choline dehydrogenase (C0G363_9RHIZ)	39.6578	4.71035	22.574	1.25336	15.6371	2.91313	18.0339	2.31693	G	Not in top 8000 most variable DETs	No
Solyc09g065800	Fatty acid elongase 3-ketoacyl-CoA synthase (Q6DUV5_BRANA)	1178.8	32.8498	960.039	18.9599	877.094	23.0472	1054.3	57.0631	G	yellow	No
Solyc02g078100	pistil extensin-like protein (Fragment) (Q49I33_NICPL)	514.593	95.4237	532.571	90.0643	778.956	64.8459	745.681	42.0384	G	blue	No
Solyc08g067050	Arginine N-methyltransferase family protein (D7KE86_ARALY)	409.214	7.99667	415.427	28.7477	607.576	15.1342	484.006	16.0352	G	blue	No
Solyc10g047840	Ulp1 protease family C-terminal catalytic domain containing protein (Q60D46_SOLDE)	90.9644	3.85283	95.7233	18.9415	148.383	11.0273	135.059	6.03496	G	Not in top 8000 most variable DETs	No
Solyc06g071230	MYB transcription factor (A1DR86_CATRO)	4387.04	111.649	4170.06	40.2461	5707.55	265.527	4653.43	44.7586	G	turquoise	No
Solyc08g006960	AP-2 complex subunit mu (B6TIQ4_MAIZE)	1032.53	29.1497	1073.68	21.0944	1291.79	41.8387	1207.39	27.7067	G	turquoise	No
Solyc09g010280	Os08g0482100 protein (Fragment) (Q0J4Y4_ORYSJ)	3218.64	44.9894	2872.81	222.228	2450.03	69.3151	2906.75	95.1883	G	blue	No
Solyc08g080160	Hydroxymethylglutaryl-CoA synthase (A9ZMZ7_HEVBR)	1516.36	58.5262	1653.53	175.101	2435.61	178.717	1929.77	168.797	G	turquoise	No
Solyc05g006620	Tir-nbs-lrr, resistance protein	127.326	7.49154	111.258	5.17856	79.4131	4.9723	82.3931	4.09187	G	Not in top 8000 most variable DETs	No
Solyc06g068520	Hydroxyproline-rich systemin (HSY1_SOLLC)	20.5854	1.53206	9.83874	0.560076	7.63066	1.60762	11.7186	1.20011	G	Not in top 8000 most variable DETs	No
Solyc07g052900	Os09g0451700 protein (Fragment) (Q0J1B9_ORYSJ)	211.028	9.96095	220.621	19.4371	285.753	7.20963	237.987	7.85334	G	Not in top 8000 most variable DETs	No
Solyc07g008100	Genomic DNA chromosome 3 P1 clone MUJ8 (Q9LRN2_ARATH)	739.261	37.0199	726.407	31.0306	1006.58	40.3138	808.868	14.1834	G	blue	No
Solyc02g079290	SELF PRUNING 2G	43.2711	1.80163	69.5202	3.67731	122.204	31.6783	86.1405	22.9391	G	Not in top 8000 most variable DETs	Yes
Solyc11g006020	NAD(P)H-quinone oxidoreductase subunit O (NDHO_GLOVI)	796.927	23.507	598.169	45.0266	497.343	65.7407	578.255	15.444	G	yellow	No
Solyc08g066110	Profilin (Q38M47_SOLTU)	2100.12	138.937	2149.43	120.844	2557.11	69.9072	2335.54	54.9088	G	turquoise	No
Solyc01g111910	RNA polymerase II-associated protein 1 (RPAP1_HUMAN)	706.882	16.8862	791.568	17.0872	904.153	64.6888	863.219	33.7087	G	purple	No
Solyc06g069000	Uncharacterized GPI-anchored protein At4g28100 (UGPI7_ARATH)	201.188	7.09245	158.892	6.29784	100.076	15.5946	127.034	6.89036	G	Not in top 8000 most variable DETs	No
Solyc04g074640	L-ascorbate peroxidase (A8JG56_CHLRE)	1676.61	55.1061	1297.04	82.3929	1103.19	148.399	1186.4	17.7168	G	yellow	No
Solyc05g012710	Plastid division regulator MinE (Q45RR9_SOYBN)	495.372	36.3488	538.454	23.8027	655.363	18.001	658.891	20.4988	G	turquoise	No
Solyc08g014610	Alanine--glyoxylate aminotransferase 2-like 1 (AT2L1_MOUSE)	421.756	46.4734	544.336	61.1276	861.469	84.3973	672.896	38.4132	G	blue	No
Solyc02g070340	40S ribosomal protein S4-like protein (Q2XPX5_SOLTU)	1874.67	38.1414	1853.24	13.1102	2428.83	126.464	2182.95	50.9811	G	turquoise	No
Solyc01g008950	Calmodulin 1 (manually curated)	3291.69	193.536	3601.88	153.576	4514.18	135.207	3984.77	132.02	G	turquoise	No
Solyc06g009530	Nodal modulator 3 (B0XK54_CULQU)	3371.42	84.5375	3510.17	128.407	4103.41	275.256	3961.22	62.9945	G	yellow	No
Solyc01g079420	Cytochrome c oxidase subunit VC family protein (D7LT63_ARALY)	1891.51	61.351	1888.19	52.3866	2398.79	117.654	1984.53	123.858	G	turquoise	No
Solyc08g007440	Phytoene synthase (B6TWB6_MAIZE)	312.105	10.9054	315.745	5.54375	402.064	9.1353	367.065	3.64979	G	Not in top 8000 most variable DETs	No
Solyc02g092490	Acetyltransferase-like protein (Q7EYF5_ORYSJ)	256.525	4.41384	218.733	41.3731	547.743	114.98	326.644	50.247	G	turquoise	No
Solyc04g076970	BZIP transcription factor (A7Y1S1_BRAJU)	28.0462	1.85852	35.4957	5.89435	13.5648	2.63772	23.6527	3.30193	G	Not in top 8000 most variable DETs	No
Solyc12g042770	Chloroplast post-illumination chlorophyll fluorescence increase protein (A1Y9I8_TOBAC)	2566.32	30.1181	2252.82	158.703	1813.42	219.437	2104.25	52.5655	G	yellow	No
Solyc07g025270	Unknown Protein	61.2016	9.83162	34.8144	3.60436	30.4772	1.74506	35.6937	2.93024	G	Not in top 8000 most variable DETs	No
Solyc07g053920	Mannan endo-1 4-beta-mannosidase (A8FDC6_BACP2)	1632.47	50.9169	1659.55	86.2187	1293.79	10.3347	1493.39	25.1116	G	turquoise	No
Solyc11g012650	TPD1 (Q6TLJ2_ARATH)	115.518	16.2596	137.287	20.1416	269.237	49.4434	186.32	21.8872	G	Not in top 8000 most variable DETs	No
Solyc03g005470	Nicotiana lesion-inducing like (B6T757_MAIZE)	2404.58	117.371	2950.84	207.657	3568.44	160.998	3230.37	165.114	G	turquoise	No
Solyc12g096000	RNA helicase DEAD41 (manually curated)	5122.58	335.105	6022.03	143.361	7235.67	248.241	7068.52	162.092	G	greenyellow	No
Solyc05g056510	Mucin-like protein (Q8S2G4_ORYSJ)	858.435	22.0454	897.521	22.0298	1205.78	61.5032	1043.92	14.3033	G	turquoise	No
Solyc06g084350	U6 snRNA-associated Sm-like protein LSm2 (B9EPQ0_SALSA)	311.626	28.0544	321.569	17.8252	436.703	19.2741	400.019	28.731	G	Not in top 8000 most variable DETs	No
Solyc04g009420	Photosystem II oxygen evolving complex protein PsbP (Q11A16_TRIEI)	397.606	15.379	334.602	25.7692	234.052	19.2935	273.399	16.3922	G	Not in top 8000 most variable DETs	No
Solyc11g062270	Signal recognition particle protein (SRP72) (Q5CNY3_CRYHO)	2213.46	84.6753	2407.63	71.5616	2898.54	129.129	2858.41	97.593	G	turquoise	No
Solyc12g099470	Translation initiation factor 2 gamma subunit (Q684L1_9INSE)	1129.65	38.6553	1205.63	23.546	1418.26	21.0019	1380.24	32.4715	G	turquoise	No
Solyc02g062340	Fructose-bisphosphate aldolase (Q9SXX4_NICPA)	8194.87	317.898	7446.67	442.838	4823.89	644.049	6406.28	337.525	G	yellow	No
Solyc06g006020	Receptor like kinase, RLK	20.3275	6.94496	15.7937	3.18758	6.57838	1.95198	12.1395	1.42757	G	Not in top 8000 most variable DETs	No
Solyc09g010120	Unknown Protein	751.795	22.6238	613.662	32.3284	472.76	42.3855	560.378	17.378	G	yellow	No
Solyc06g074850	Serine carboxypeptidase (Q2Z1Y2_PRUMU)	545.07	34.273	535.225	17.9005	392.771	60.9332	422.026	6.55008	G	turquoise	No
Solyc11g007370	UDP-glucosyltransferase (Q8LKG3_STERE)	166.48	10.6847	212.428	45.1637	309.649	5.55082	262.261	32.0278	G	Not in top 8000 most variable DETs	No
Solyc10g078730	Non-structural maintenance of chromosome element 4 (B6K0D9_SCHJY)	139.546	10.9743	126.659	4.82913	186.927	12.4372	167.173	9.22451	G	Not in top 8000 most variable DETs	No
Solyc01g107390	Auxin-responsive GH3 product (Q05680_SOYBN)	813.28	52.4683	599.166	72.1167	493.115	55.0729	542.927	22.4983	G	turquoise	No
Solyc06g005370	Predicted 2 3-bisphosphoglycerate-independent phosphoglycerate mutase (D9PU88_METTM)	427.862	12.7238	447.894	10.616	551.719	41.6889	528.409	20.8482	G	Not in top 8000 most variable DETs	No
Solyc07g056170	Subtilisin-like protease (Q6WNU4_SOYBN)	510.092	21.7448	470.395	21.1843	343.4	10.0645	385.702	22.4606	G	Not in top 8000 most variable DETs	No
Solyc09g065920	Magnesium transporter MRS2-I (MRS2I_ORYSJ)	204.949	7.70789	185.765	10.3974	134.806	13.7381	174.446	5.39926	G	Not in top 8000 most variable DETs	No
Solyc10g084910	SUPERMAN-like zinc finger protein (Q3YK12_GOSHI)	13.9764	2.06747	16.0655	3.09839	4.41211	1.2274	8.2934	1.55506	G	Not in top 8000 most variable DETs	No
Solyc01g100000	F-box protein PP2-B1 (PP2B1_ARATH)	44.1802	3.71879	26.2698	4.93615	14.9196	1.73012	19.0868	1.58629	G	Not in top 8000 most variable DETs	No
Solyc03g034170	Uncharacterized conserved membrane protein (A5GSC9_SYNR3)	1150.17	29.4151	1004.54	20.9259	763.949	59.9343	857.255	35.0518	G	turquoise	No
Solyc06g074090	Sterol reductase (A8IA67_CHLRE)	535.94	18.688	527.766	30.7494	723.861	72.1603	647.54	45.0166	G	turquoise	No
Solyc06g062440	Cc-nbs-lrr, resistance protein	387.327	17.594	397.251	13.2028	278.765	12.6401	316.131	7.38401	G	Not in top 8000 most variable DETs	No
Solyc01g079540	ADP-ribosylation factor-like protein 3 (ARL3_CAEEL)	2162.58	100.904	2430.13	118.375	3082.65	146.464	2817.39	105.464	G	turquoise	No
Solyc01g094080	Cytochrome P450	1017.62	24.4523	840.428	48.0046	697.771	78.3249	811.97	26.1196	G	yellow	No
Solyc01g095520	Arabinogalactan peptide 16 (AGP16_ARATH)	15.5193	2.99924	12.6045	1.385	37.5604	5.76562	17.6825	2.48389	G	Not in top 8000 most variable DETs	No
Solyc07g063310	LanC-like protein 2 (B6TCV9_MAIZE)	240.886	7.62447	273.672	13.2319	313.705	16.236	260.286	17.2654	G	Not in top 8000 most variable DETs	No
Solyc04g051500	Integral membrane protein like (B6TAA4_MAIZE)	1127.22	34.2824	1232.26	109.647	1555.91	26.8447	1247.24	46.6823	G	blue	No
Solyc06g068400	60S ribosomal protein L7-like protein (B3TM16_ELAGV)	372.148	16.5794	342.83	7.38396	498.952	37.0995	409.984	6.09514	G	Not in top 8000 most variable DETs	No
Solyc12g006010	Small ubiquitin-related modifier (A6BMG7_COPCI)	1135.06	64.1348	1078.28	35.0282	1515.25	49.9782	1270.29	22.3104	G	turquoise	No
Solyc12g097030	Carboxyl-terminal processing protease (Q5N158_SYNP6)	924.356	8.72673	786.632	64.3906	666.91	50.9866	823.286	11.4403	G	yellow	No
Solyc08g007850	Unknown Protein	7.55216	1.69022	12.0444	4.18726	21.9472	5.9349	17.1463	1.44235	G	Not in top 8000 most variable DETs	No
Solyc01g091290	Sec1-5 syntaxin-binding protein (Q3SEP8_PARTE)	71.0574	8.55667	79.2557	19.7299	126.454	11.3609	110.739	3.9975	G	Not in top 8000 most variable DETs	No
Solyc04g009030	Glyceraldehyde-3-phosphate dehydrogenase (D7UNZ5_BRARC)	15642	846.981	13727.2	797.385	11714	1501.51	14104.1	535.53	G	yellow	No
Solyc07g054920	2-oxoglutarate-iron(II)-dependent oxygenase (D8T1V3_SELML)	346.413	34.517	378.709	42.6646	499.632	21.252	385.441	12.163	G	Not in top 8000 most variable DETs	No
Solyc01g008850	CBL-interacting protein kinase 18 (C4P7W7_VITVI)	3761.01	198.905	3584.06	49.3436	3021.25	96.8984	3250.46	69.2733	G	turquoise	No
Solyc01g110160	Chromosome 11 contig 1 DNA sequence (Q00YQ5_OSTTA)	429.239	26.044	325.199	32.2842	264.661	17.3752	295.374	8.42279	G	Not in top 8000 most variable DETs	No
Solyc11g068690	Lrr, resistance protein fragment	252.678	8.98332	272.805	14.2221	365.858	11.3981	293.285	9.98211	G	Not in top 8000 most variable DETs	No
Solyc08g061630	Conserved hypothetical membrane protein (Q7V1G3_PROMP)	2551.29	232.098	1905.08	120.239	1740.78	129.949	1640.45	115.139	G	turquoise	No
Solyc08g083210	endo-1,4-beta-glucanase (cel5) (manually curated)	1493.83	76.8069	1279.51	48.4694	1074.99	37.0827	1066.7	22.6022	G	greenyellow	No
Solyc12g008680	Meiotic nuclear division protein 1 homolog (C1C1M1_9MAXI)	211.829	27.2425	240.77	38.218	366.668	24.9107	275.313	17.791	G	Not in top 8000 most variable DETs	No
Solyc10g081450	Hydrolase alpha/beta fold family protein (D7LX46_ARALY)	271.437	9.79274	202.055	14.261	201.964	10.7111	179.185	18.3262	G	Not in top 8000 most variable DETs	No
Solyc02g078360	Thioredoxin family protein (D7M1V6_ARALY)	1021.64	29.2871	1128.2	20.5617	1364.03	68.0912	1355.53	40.814	G	turquoise	No
Solyc04g072650	Unknown Protein	9.19016	1.26107	6.70799	2.45188	23.1057	1.65973	17.7078	2.06436	G	Not in top 8000 most variable DETs	No
Solyc06g060770	Methionyl-tRNA formyltransferase (FMT_STAEQ)	95.2394	5.03498	80.7209	2.78666	55.771	5.08651	67.3797	3.61895	G	Not in top 8000 most variable DETs	No
Solyc12g089380	expansin 8 (manually curated)	886.999	40.3266	993.296	141.042	1207.74	58.7635	1110.49	49.2869	G	turquoise	No
Solyc03g006030	Receptor like kinase, RLK	748.729	52.2186	589.23	55.5176	420.988	57.6669	532.811	16.2762	G	yellow	No
Solyc12g049040	Extensin-like protein Ext1 (Q8VWM5_SOLLC)	361.009	65.6945	427.137	138.525	662.984	46.1713	472.46	32.7314	G	blue	No
Solyc06g066620	Threonine endopeptidase (B6SNJ7_MAIZE)	2301.85	88.5732	1934.36	78.8379	1425.81	109.826	1565.31	24.5986	G	yellow	No
Solyc02g090110	WAK-like kinase (manually curated)	556.018	11.906	667.346	60.9464	418.421	18.53	528.485	39.8368	G	blue	No
Solyc09g059620	SAM domain family protein (B6TMA1_MAIZE)	780.203	30.3369	827.887	21.7236	1005.91	20.0631	920.973	9.48258	G	turquoise	No
Solyc06g062760	50S ribosomal protein L34 (Q84R26_ARATH)	570.273	27.4578	487.108	10.1745	724.113	34.469	603.795	17.2359	G	turquoise	No
Solyc08g066850	Lactoylglutathione lyase (B6SSK1_MAIZE)	2069.38	61.9551	1823.18	39.9109	1618.87	87.4258	1795.6	56.3313	G	yellow	No
Solyc09g065910	Photosystem II reaction center W protein (B6TMB3_MAIZE)	4725.9	188.21	3750.59	349.733	3134.53	486.864	3591.09	133.414	G	yellow	No
Solyc01g096610	UPF0468 protein C16orf80 homolog (C1BNI4_9MAXI)	297.057	9.45823	324.062	9.82299	392.501	14.0357	366.044	10.0719	G	Not in top 8000 most variable DETs	No
Solyc09g009150	D-mannose binding lectin family protein expressed (Q10JE9_ORYSJ)	112.299	3.03329	91.5257	8.6334	77.1415	1.43992	75.8544	4.5533	G	Not in top 8000 most variable DETs	No
Solyc07g065510	Glycine-rich RNA binding protein (B7SDF0_ORYSJ)	1000.95	31.6822	1097.76	17.9276	1222.51	27.7775	1226.12	55.1218	G	greenyellow	No
Solyc01g067800	E3 ubiquitin-protein ligase MARCH1 (MARH1_MOUSE)	664.457	21.3703	672.625	44.8178	497.591	20.0001	598.653	22.7514	G	blue	No
Solyc04g008470	Defensin protein (B1N682_SOLPI)	283.554	12.4953	354.145	52.275	545.971	75.225	446.325	25.3113	G	turquoise	No
Solyc08g080960	AT-hook motif nuclear localized protein 1 (O04696_PEA)	107.954	2.22965	120.625	7.73795	157.374	9.24565	142.75	8.80154	G	Not in top 8000 most variable DETs	No
Solyc09g065350	Unknown Protein	88.8059	5.12807	82.7552	14.9226	51.4888	6.27518	60.0816	3.61216	G	Not in top 8000 most variable DETs	No
Solyc02g076890	Unknown Protein; contains Interpro domain(s) IPR007493 Protein of unknown function DUF538	98.7938	10.1397	151.296	38.2243	244.617	20.6019	206.797	14.678	G	Not in top 8000 most variable DETs	No
Solyc01g090430	NRC1 (manually curated)	395.245	4.38027	357.71	32.2776	290.117	17.122	380.357	10.9358	G	Not in top 8000 most variable DETs	No
Solyc05g005750	Alpha alpha-trehalose-phosphate synthase (UDP-forming) (A3CXN9_METMJ)	3136.54	141.944	3621.83	116.693	3814.01	169.148	3393.81	62.8964	G	yellow	No
Solyc04g056580	Homology to unknown gene (Q00YK5_OSTTA)	1106.19	13.672	889.681	73.2668	683.481	74.7229	783.837	43.6939	G	yellow	No
Solyc06g005570	Genomic DNA chromosome 5 TAC clone K22G18 (Q9FH52_ARATH)	667.19	16.2721	712.71	22.5036	877.216	23.5699	793.674	20.0059	G	turquoise	No
Solyc10g080070	GTP-binding family protein (D7LHA2_ARALY)	58.0923	3.79401	50.7062	2.06162	92.7485	7.13362	70.2068	5.71629	G	Not in top 8000 most variable DETs	No
Solyc08g079110	Pentapeptide repeat (Q4C7L8_CROWT)	858.669	36.2047	699.18	43.5488	577.85	54.1804	651.23	32.7431	G	yellow	No
Solyc12g014500	S-adenosyl-L-methionine salicylic acid carboxyl methyltransferase-like protein (Q9FLN8_ARATH)	16.2917	1.46309	19.3393	2.85366	47.7808	12.7542	23.807	3.92654	G	Not in top 8000 most variable DETs	No
Solyc03g111610	HAD-superfamily hydrolase subfamily IA variant 3 containing protein expressed (Q10I42_ORYSJ)	2971.68	170.767	2384.44	279.124	1670.94	287.228	2037.43	155.897	G	yellow	No
Solyc07g042090	Transmembrane protein 34 (A9UM61_XENTR)	9.75885	1.29821	12.3433	1.83093	23.5469	3.93345	21.8779	1.48335	G	Not in top 8000 most variable DETs	No
Solyc07g063370	Beta-glucosidase (B6SYQ7_MAIZE)	54.0373	2.20906	87.4194	22.7862	134.751	6.94256	77.3735	7.00759	G	Not in top 8000 most variable DETs	No
Solyc07g043670	Hydroxycinnamoyl CoA quinate transferase 2 (D8L7F0_CYNSC)	66.5262	3.91908	75.1905	18.8187	113.385	9.50706	86.294	10.139	G	Not in top 8000 most variable DETs	No
Solyc07g009490	Ethanolamine-phosphate cytidylyltransferase (C5DB57_VITVI)	1542.51	63.6466	1750.95	44.2785	2081.38	72.4092	1917.82	48.7622	G	yellow	No
Solyc04g011430	Ubiquitin-conjugating enzyme 13 E2 (D8QMV8_SELML)	2493.13	148.555	2739.05	69.6734	3048.38	146.092	2697.5	128.636	G	purple	No
Solyc02g065110	Protein serine/threonine kinase (D3BP85_POLPA)	114.861	5.92402	99.5684	5.85335	74.7901	3.65302	84.6479	1.90657	G	Not in top 8000 most variable DETs	No
Solyc08g068190	Aldehyde dehydrogenase (Q43274_MAIZE)	87.9408	11.4162	179.021	50.7877	362.454	40.6873	309.315	28.0184	G	turquoise	No
Solyc07g009150	Uncharacterized aarF domain-containing protein kinase 1 (ADCK1_HUMAN)	598.645	21.9897	530.929	35.71	451.659	47.5902	505.016	20.8417	G	Not in top 8000 most variable DETs	No
Solyc06g065490	PsbP domain-containing protein 6, chloroplastic (PPD6_ARATH)	1175.36	22.7144	1010.43	41.5017	830.582	81.974	966.846	16.0535	G	yellow	No
Solyc04g080560	Unknown Protein	49.4393	3.56754	68.4072	9.85265	83.1529	8.18391	55.5571	4.12329	G	Not in top 8000 most variable DETs	No
Solyc08g081950	Ubiquitin-conjugating enzyme E2 10 (UBC10_ARATH)	3304.28	94.0685	3518.21	148.925	4040.71	229.865	3859.54	202.916	G	turquoise	No
Solyc01g009570	Unknown Protein	35.4444	4.43123	24.567	3.36268	8.86839	1.58025	11.6863	2.50766	G	Not in top 8000 most variable DETs	No
Solyc01g103720	Ribosome biogenesis protein ERB1 (ERB1_CRYNE)	1320.75	39.2811	1341.89	20.3113	1760.93	76.0742	1626.83	50.8849	G	turquoise	No
Solyc12g011420	Integral membrane single C2 domain protein (D7L359_ARALY)	100.959	5.20583	124.254	4.27852	200.621	23.6127	152.354	3.63878	G	Not in top 8000 most variable DETs	No
Solyc07g047880	Downward leaf curling protein (B3XZN9_CUCME)	421.857	9.28854	374.68	10.2677	328.011	10.6863	297.038	9.66534	G	Not in top 8000 most variable DETs	No
Solyc05g007440	DNA-binding protein HGH1 (C1GSM5_PARBA)	535.575	29.6653	581.407	21.1812	674.751	15.7864	688.01	17.9853	G	Not in top 8000 most variable DETs	No
Solyc03g112900	Iron-sulfur cluster assembly scaffold protein IscU (D0I7Q6_VIBHO)	2456.82	34.2244	2512.7	40.2318	2978.02	87.891	2909.17	23.5254	G	turquoise	No
Solyc10g008660	Malonyl CoA anthocyanin 5-O-glucoside-6&apos&apos&apos-O-malonyltransferase (Q8W1X0_PERFR)	719.152	40.0319	787.214	46.133	535.508	55.836	550.739	45.8629	G	turquoise	No
Solyc02g077100	Lipase-like protein (Q8LF19_ARATH)	490.864	11.3324	446.186	11.4989	378.412	14.3542	386.335	18.9697	G	Not in top 8000 most variable DETs	No
Solyc09g059670	Alpha/beta hydrolase fold-1 (Q2IHF4_ANADE)	166.544	6.49254	179.07	5.72667	219.297	17.5937	217.012	10.7051	G	Not in top 8000 most variable DETs	No
Solyc09g075200	U1 small nuclear ribonucleoprotein A (Q16H40_AEDAE)	813.723	9.79694	815.566	29.3058	1037.41	39.7281	952.492	15.6675	G	turquoise	No
Solyc07g056580	ethylene receptor 2 (manually curated)	608.717	22.5239	549.703	30.9064	483.603	23.5151	494.868	10.4534	G	Not in top 8000 most variable DETs	No
Solyc07g008060	Phosphatidylinositol binding clathrin assembly protein like (Q6AXI5_DANRE)	712.814	16.1467	723.44	44.2076	529.976	27.5912	626.901	33.0089	G	turquoise	No
Solyc08g076410	Shikimate kinase-like protein (B9GZJ5_POPTR)	1256.91	40.4394	1035.95	51.0004	893.966	40.2134	990.213	41.1463	G	turquoise	No
Solyc03g116790	Chaperone protein dnaJ (B6TAJ2_MAIZE)	1362.65	61.3935	1094.38	65.7262	1074.25	33.0168	1197.79	76.3759	G	yellow	No
Solyc06g060180	Alpha-humulene/(-)-(E)-beta-caryophyllene synthase (HUMS_ARATH)	0	0	1.32247	0.520641	27.802	15.247	6.98402	3.80097	G	Not in top 8000 most variable DETs	No
Solyc02g036430	NAC-domain transcription factor (D3WFN5_WHEAT)	82.2	4.4352	72.6503	3.3872	45.0167	5.29743	49.2198	2.8641	G	Not in top 8000 most variable DETs	No
Solyc09g066290	Kinesin light chain-like (Q6K715_ORYSJ)	179.127	2.9833	160.187	13.8078	258.418	16.0682	185.246	4.36342	G	Not in top 8000 most variable DETs	No
Solyc03g062710	Aldose 1-epimerase family protein expressed (Q10CW2_ORYSJ)	1582.16	59.1064	1330.84	106.315	957.549	108.026	1171.67	34.4405	G	yellow	No
Solyc04g051690	WRKY transcription factor 51 (manually curated)	14.0394	1.60988	16.9311	3.63714	4.8887	1.89749	9.42009	2.13513	G	Not in top 8000 most variable DETs	No
Solyc03g083820	Endoglucanase 1 (B6U0P7_MAIZE)	9.18672	1.73261	14.9258	5.63678	21.9543	2.81857	27.5207	2.44713	G	Not in top 8000 most variable DETs	No
Solyc09g011810	Fructose-1 6-bisphosphatase class 1 (D0MHZ8_RHOM4)	1929.41	140.876	1622.38	121.544	1253.72	169.174	1454.4	37.4705	G	yellow	No
Solyc12g099080	ADP ribosylation factor (Q08IJ1_TOBAC)	2086.75	64.8706	2500.97	121.209	2658.12	128.831	2627.06	24.9499	G	turquoise	No
Solyc01g090460	HD-ZIP (manually curated)	924.064	40.3063	1020.51	68.8186	1341.94	161.119	1038.35	71.0603	G	blue	No
Solyc02g072160	NADH ubiquinone oxidoreductase complex I intermediate-associated protein 30 (B2IZH1_NOSP7)	1072.17	37.5374	932.956	104.484	666.974	52.3816	799.603	27.7579	G	yellow	No
Solyc07g006900	SlPIN2 (manually curated)	177.399	20.483	225.354	33.84	367.065	15.8103	276.917	15.0074	G	blue	No
Solyc00g006810	Peptidyl-prolyl cis-trans isomerase (Q8DJW8_THEEB)	812.892	12.6503	637.396	54.1737	610	25.3569	593.856	25.0938	G	turquoise	No
Solyc11g068890	NHL1 (Fragment) (B0LZK8_ARATH)	27.4697	4.25453	23.9115	3.08477	11.4239	2.55697	16.5113	1.16283	G	Not in top 8000 most variable DETs	No
Solyc01g090500	Unknown Protein	281.126	7.93245	277.548	17.4824	371.706	20.2871	340.533	11.4131	G	Not in top 8000 most variable DETs	No
Solyc11g066160	Histone H4 (B6T0P4_MAIZE)	222.347	6.53215	205.503	13.2568	357.215	42.185	278.834	22.767	G	Not in top 8000 most variable DETs	No
Solyc03g121660	Zinc finger protein (Q9LVQ7_ARATH)	1057.37	42.5878	917.501	35.6989	664.906	11.7569	847.711	36.3365	G	turquoise	No
Solyc02g030080	WD-40 repeat protein (B4D682_9BACT)	1356.13	41.6154	1421.71	51.702	1743.13	70.176	1681.56	68.1579	G	turquoise	No
Solyc04g080580	Kinase PfkB family (D4WID3_BACOV)	2654.5	29.1328	2638.42	149.351	2162.37	93.8747	2361.31	66.9351	G	blue	No
Solyc03g025440	Zinc finger family protein (D7MFZ1_ARALY)	553.209	12.7565	621.127	4.24285	746.384	25.732	706.433	35.0722	G	purple	No
Solyc07g049240	Peroxidase (Q07445_SOLLC)	79.3785	15.6109	145.063	47.0848	279.022	39.5175	218.413	33.2529	G	blue	No
Solyc04g072030	Interferon-induced GTP-binding protein Mx (Fragment) (MX_PERFL)	46.8503	6.2206	43.5596	8.56433	24.984	3.65831	34.7007	4.80832	G	Not in top 8000 most variable DETs	No
Solyc02g014150	Photosystem II stability/assembly factor Ycf48-like protein (B0C6T3_ACAM1)	3694.75	94.9004	3144.67	142.383	2922.76	114.531	3340.24	142.27	G	yellow	No
Solyc09g008320	Xyloglucan endotransglucosylase/hydrolase 12 (C0IRH1_9ERIC)	2633.9	159.035	2124.84	234.177	2046.96	94.4609	2105.28	79.5823	G	yellow	No
Solyc11g064750	Pentatricopeptide repeat-containing protein (D7LJE4_ARALY)	306.77	12.6251	258.531	16.6663	219.842	17.4591	215.634	12.2405	G	Not in top 8000 most variable DETs	No
Solyc04g082300	Histone-binding protein RBBP7 (D0NGC2_PHYIN)	639.396	23.8268	653.948	18.5069	801.778	33.0089	743.857	20.9298	G	Not in top 8000 most variable DETs	No
Solyc07g056260	Glucan synthase like 3 (D8R8I5_SELML)	1769.38	19.3197	1701.81	43.4727	1342.85	60.3528	1497.14	81.5272	G	turquoise	No
Solyc07g047740	TOMTPX2A peroxidase (manually curated)	704.595	98.3127	961.35	150.684	1520.73	147.839	1062.22	82.1862	G	blue	No
Solyc03g098050	Calmodulin 6 (manually curated)	2229.31	102.847	2264.27	67.0253	2983.15	143.988	2568.56	82.6863	G	turquoise	No
Solyc11g068750	NAC domain protein IPR003441 (B9HQ28_POPTR)	288.754	2.2934	273.916	13.3112	388.467	18.8287	303.881	8.99976	G	Not in top 8000 most variable DETs	No
Solyc05g051270	Cysteine-rich repeat secretory protein 60 (CRR60_ARATH)	158.623	20.3886	123.055	11.0382	72.7481	4.76428	109.444	7.5592	G	Not in top 8000 most variable DETs	No
Solyc08g080340	Lysophospholipid acyltransferase (B6K7S6_SCHJY)	540.691	18.1919	587.671	47.819	741.614	34.4338	633.943	19.1667	G	blue	No
Solyc12g098550	Ectonucleoside triphosphate diphosphohydrolase 6 (Q6YHK4_CAVPO)	26.008	0.979258	30.6478	10.5078	87.9217	8.1619	53.475	11.4488	G	Not in top 8000 most variable DETs	No
Solyc01g102820	2-C-methyl-D-erythritol 4-phosphate cytidylyltransferase (A9ZN09_HEVBR)	1067.65	10.7368	914.862	27.8493	823.879	53.9168	821.125	38.0098	G	turquoise	No
Solyc06g059970	TPI (manually curated)	4.90869	1.33105	8.07621	1.47978	18.1914	3.56615	14.1636	2.897	G	Not in top 8000 most variable DETs	No
Solyc03g080030	Unknown Protein	48.3947	5.11556	69.9539	13.4459	134.499	14.2016	105.4	10.5618	G	Not in top 8000 most variable DETs	No
Solyc05g054780	Disease resistance response/ dirigent-like protein (Q9M3C8_ARATH)	1559.96	113.624	1222.71	79.3386	1064.09	64.7682	958.731	123.595	G	turquoise	No
Solyc05g025810	Strictosidine synthase family protein (Q2SQU4_HAHCH)	534.691	36.1858	531.582	15.8622	403.222	43.35	452.731	11.2575	G	Not in top 8000 most variable DETs	No
Solyc02g067080	UDP-D-glucose dehydrogenase (D2WK25_GOSHI)	3001.78	171.125	3119.04	77.8572	3770.8	178.372	3665.49	131.111	G	turquoise	No
Solyc03g114320	Kinesin light chain (B6SPN7_MAIZE)	1423.68	46.1352	1559.39	123.139	1836.1	108.735	1808.08	83.8739	G	turquoise	No
Solyc04g072810	CRAL/TRIO domain containing protein expressed (Q75GU9_ORYSJ)	988.684	10.2474	907.287	39.2655	692.575	53.65	734.322	48.2796	G	turquoise	No
Solyc01g017740	Cytochrome b6 (B7T3I6_9ROSI)	17.4671	3.27483	10.2842	1.27907	3.75917	1.07159	6.99876	1.9507	G	Not in top 8000 most variable DETs	No
Solyc08g021880	Unknown Protein	90.9767	6.80664	100.823	4.46071	137.881	14.0614	105.367	3.67353	G	Not in top 8000 most variable DETs	No
Solyc02g090430	Protein serine/threonine kinase (D3BP85_POLPA)	1166.01	57.4375	1070.48	46.8707	770.793	68.9587	973.733	47.016	G	turquoise	No
Solyc01g087190	Chaperonin-like protein (Q2LJI6_9NOSO)	438.079	3.03067	372.656	32.8036	325.821	25.7317	353.854	1.32198	G	Not in top 8000 most variable DETs	No
Solyc03g083450	UPF0369 protein C6orf57 (CF057_HUMAN)	249.51	4.86948	274.749	3.44339	338.713	18.1779	314.704	6.54003	G	Not in top 8000 most variable DETs	No
Solyc07g008660	30S ribosomal protein S16 (B3IWG3_SOLLC)	297.688	7.87248	307.105	5.24658	421.074	15.0399	354.652	10.1742	G	Not in top 8000 most variable DETs	No
Solyc02g084240	H1 histone-like protein (manually curated)	1640.37	47.6546	1806.44	72.0333	2408.57	189.667	2039.98	66.4553	G	purple	No
Solyc09g083150	NAD(P)H-quinone oxidoreductase subunit N (D4ZT43_SPIPL)	822.176	21.4146	765.586	56.0522	579.892	71.4251	729.927	19.6606	G	yellow	No
Solyc05g052500	Dehydration-responsive family protein (D7LF23_ARALY)	989.522	23.7218	1005.94	81.6938	1228.78	23.2777	1109.51	13.1716	G	blue	No
Solyc00g053440	Transmembrane BAX inhibitor motif-containing protein 4 (B6T5N6_MAIZE)	353.294	13.5958	338.227	13.737	257.204	14.7368	297.955	15.844	G	Not in top 8000 most variable DETs	No
Solyc03g043940	Unknown Protein	113.71	5.19163	87.8974	7.36169	67.5504	10.3036	63.3898	3.8804	G	Not in top 8000 most variable DETs	No
Solyc05g006780	NPH3 domain containing protein-like (Q8GVF8_ORYSJ)	479.491	22.044	451.181	23.8923	343.991	6.2018	372.856	14.525	G	Not in top 8000 most variable DETs	No
Solyc05g017950	anion:sodium symporter (manually curated)	2611.5	94.7818	2345.47	140.133	2127.17	44.5642	2413.02	75.7764	G	yellow	No
Solyc03g078640	Unknown Protein	221.51	9.44277	196.453	12.2477	156.625	22.9299	163.746	5.27628	G	Not in top 8000 most variable DETs	No
Solyc02g081030	Uncharacterized membrane protein C2G11.09 (YAB9_SCHPO)	2931.34	51.6458	2556.55	226.419	2317.35	45.6449	2617.54	45.7184	G	yellow	No
Solyc07g044710	3-hydroxyisobutyryl-CoA hydrolase (C0SE19_PARBP)	71.5051	10.8714	127.729	28.1479	152.181	11.1149	185.543	30.9919	G	Not in top 8000 most variable DETs	No
Solyc05g056090	Unknown Protein; contains Interpro domain(s) IPR009724 Protein of unknown function DUF1301	302.042	14.8349	311.298	6.50777	421.62	28.0163	366.603	10.6611	G	Not in top 8000 most variable DETs	No
Solyc01g080890	Unknown Protein	276.958	15.5822	345.857	21.3439	408.819	34.1548	441.266	26.5292	G	Not in top 8000 most variable DETs	No
Solyc01g100850	ABC transporter ATP-binding protein (Q88ZT3_LACPL)	570.931	9.6181	608.861	11.4466	431.336	22.028	550.849	20.3146	G	Not in top 8000 most variable DETs	No
Solyc07g018250	Elongation of very long chain fatty acids protein AAEL008004 (C1BRC3_9MAXI)	64.6779	9.75263	53.9547	5.2307	40.4076	2.25586	34.8278	2.45409	G	Not in top 8000 most variable DETs	No
Solyc10g079880	Eukaryotic translation initiation factor 3 subunit 6 (B6TRV3_MAIZE)	4333.69	85.6533	4591.23	29.8439	5434.91	191.515	5280.33	101.171	G	turquoise	No
Solyc07g066000	Amino acid permease (B9N5L9_POPTR)	1215.79	27.0983	1124.31	75.4478	968.708	56.5751	988.874	24.4357	G	turquoise	No
Solyc01g109380	Unknown Protein; contains Interpro domain(s) IPR007749 Protein of unknown function DUF677	393.868	24.5318	405.316	14.2651	552.199	47.3052	435.501	28.7617	G	turquoise	No
Solyc06g076340	mRNA binding protein Pumilio 2 (C1GCQ9_PARBD)	2596.81	65.5149	3130.66	98.2685	3455.24	197.741	3673.4	95.6819	G	turquoise	No
Solyc01g067750	dehydroquinate dehydratase/shikimate:NADP oxidoreductase (manually curated)	3745.15	65.3015	3800.25	147.559	3101.38	30.2164	3366.39	72.3971	G	turquoise	No
Solyc02g082940	Os03g0291800 protein (Fragment) (Q0DSS4_ORYSJ)	197.175	9.59913	198.626	19.9683	272.374	5.90362	223.834	15.5531	G	Not in top 8000 most variable DETs	No
Solyc04g005490	Appr-1-p processing domain protein (D5EGM7_AMICL)	1176.59	22.2876	1088.33	61.6561	871.725	39.6586	975.324	36.4792	G	turquoise	No
Solyc01g067040	PWWP domain-containing protein (D7L3U3_ARALY)	26.6579	1.94934	21.3581	1.91882	66.2695	14.316	33.7697	6.22268	G	Not in top 8000 most variable DETs	No
Solyc12g100100	Extensin-like protein Ext1 (Q8VWM5_SOLLC)	136.46	24.3585	164.991	53.4077	276.109	33.1157	208.577	11.3907	G	Not in top 8000 most variable DETs	No
Solyc10g083230	F-box family protein (B9MYU0_POPTR)	39.951	2.13632	39.3371	7.83466	15.194	3.27596	31.7451	6.05634	G	Not in top 8000 most variable DETs	No
Solyc02g082450	Auxin efflux carrier family protein (D7L9F0_ARALY)	224.091	7.73984	327.554	30.8298	332.577	31.3438	376.917	46.5448	G	Not in top 8000 most variable DETs	No
Solyc05g055700	Alcohol dehydrogenase zinc-binding domain protein (D5VIT9_CAUST)	169.095	2.99328	124.871	12.161	112.155	2.71381	112.851	7.44539	G	Not in top 8000 most variable DETs	No
Solyc01g087680	Uncharacterized membrane protein (A5GLU3_SYNPW)	702.25	23.961	677.41	23.0548	537.809	42.9804	579.138	26.1542	G	turquoise	No
Solyc08g081150	GMP synthase (D3KZU2_9BACT)	936.394	28.8472	974.852	43.7478	1220.92	68.6091	1049.51	34.4152	G	turquoise	No
Solyc05g051850	putative myo-inositol-1-phosphatase (manually curated)	628.805	21.8361	794.161	117.333	988.75	55.2602	965.573	72.3286	G	turquoise	No
Solyc01g101240	aspartic protease precursor (manually curated)	3332.69	140.862	3521.47	69.5527	2582.18	169.894	3067.89	162.905	G	pink	No
Solyc07g008420	Blue copper-like protein (A3F8V0_GOSHI)	42.4651	9.65929	52.5809	15.1789	87.346	12.1182	47.8172	5.28758	G	Not in top 8000 most variable DETs	No
Solyc02g093590	CONSTANS-like zinc finger protein (D0EP06_SOYBN)	822.468	29.4228	522.12	136.836	312.175	22.2821	491.873	21.9702	G	yellow	No
Solyc04g080970	Short internode related sequence 5 (D2KC76_BRARP)	43.8388	3.86345	35.1299	3.08494	21.8061	3.38831	27.7149	1.9032	G	Not in top 8000 most variable DETs	No
Solyc03g093970	Signal recognition particle 68 (A2AAN1_MOUSE)	508.777	9.54462	539.402	16.9806	707.482	37.3071	666.098	18.8584	G	turquoise	No
Solyc06g060400	Ribosomal protein L15 (B9GPA1_POPTR)	4008.42	230.287	4182.45	176.097	5677.58	322.847	5129.7	72.1705	G	turquoise	No
Solyc12g007060	Unknown Protein	625.828	51.9491	743.193	40.667	1030.18	98.903	937.585	43.3928	G	turquoise	No
Solyc09g057670	FK506-binding protein 2 (EC 5.8)(Peptidyl-prolyl cis-trans isomerase)(PPIase)(Rotamase) (C8VE36_EMENI)	2653.22	74.5651	2904.48	145.826	3731.59	139.951	3375.05	117.719	G	turquoise	No
Solyc02g081350	Acyl-CoA synthetase/AMP-acid ligase II (D0C359_9GAMM)	50.8864	7.96865	36.1094	4.85038	20.3171	2.38234	20.4673	2.55549	G	Not in top 8000 most variable DETs	No
Solyc07g045540	Glucose-6-phosphate 1-dehydrogenase (O65856_TOBAC)	477.147	18.3928	402.18	56.5806	305.96	22.6879	343.872	17.9658	G	yellow	No
Solyc03g062900	Unknown Protein	210.821	5.51615	234.168	5.22578	293.375	8.20237	255.286	9.2931	G	Not in top 8000 most variable DETs	No
Solyc04g050930	violaxanthin de-epoxidase (manually curated)	1203.06	50.4347	1004.33	143.128	625.727	56.2621	826.671	31.6413	G	yellow	No
Solyc09g074880	Homology to unknown gene (Q00YR0_OSTTA)	968.55	34.9585	778.54	62.9576	714.877	28.4459	893.666	37.3148	G	yellow	No
Solyc02g069290	Transducin-like (Q6H6D6_ORYSJ)	2165.2	58.8415	2091.71	62.157	1640.78	115.298	1891.11	23.6971	G	turquoise	No
Solyc03g083840	Pectinesterase (B9R9R4_RICCO)	88.602	10.2287	85.0484	14.5581	134.758	14.9208	120.693	4.66553	G	Not in top 8000 most variable DETs	No
Solyc01g005390	Nudix hydrolase 4 (B6T5N7_MAIZE)	83.4987	5.07541	117.156	12.4649	141.856	8.49631	154.216	7.37681	G	Not in top 8000 most variable DETs	No
Solyc02g069970	Pto-like, Serine/threonine kinase protein, resistance protein	943.412	47.7685	881.935	24.6646	1202.08	38.5958	1042.68	22.6372	G	blue	No
Solyc07g052270	11-beta-hydroxysteroid dehydrogenase-like (Q9LUF1_ARATH)	0.700927	0.700927	1.87254	0.876262	32.5211	14.5718	14.3916	7.29875	G	Not in top 8000 most variable DETs	No
Solyc05g006880	Unknown Protein	1195.19	47.8684	1335.17	60.1268	1608.46	59.7722	1547.62	62.373	G	purple	No
Solyc01g016460	Unknown Protein	13.384	4.94539	0	0	0	0	0	0	G	Not in top 8000 most variable DETs	No
Solyc03g110870	Unknown Protein	1491.06	30.4319	1622.7	20.5068	1873.8	58.1325	1651.21	105.258	G	turquoise	No
Solyc08g079460	Receptor like kinase, RLK	307.203	6.39541	284.038	11.4388	224.68	5.53339	229.94	6.71549	G	Not in top 8000 most variable DETs	No
Solyc01g087970	Serine carboxypeptidase 1 (B6SW38_MAIZE)	1076.61	43.6546	1096.17	113.34	2257.43	473.855	1432.29	215.884	G	turquoise	No
Solyc11g013020	Unknown Protein	601.992	21.1575	720.782	41.9597	817.353	58.5546	833.515	14.8127	G	turquoise	No
Solyc10g080540	Homeobox-leucine zipper protein 14 (D7LZT3_ARALY)	78.9027	9.1716	64.9861	4.32292	36.1609	3.4314	43.9556	2.20762	G	Not in top 8000 most variable DETs	No
Solyc08g067250	DNA cross-link repair 1A protein (B0XKM0_CULQU)	289.916	6.9542	277.947	8.26352	374.22	18.2036	334.286	13.5445	G	Not in top 8000 most variable DETs	No
Solyc11g039910	Mitochondrial import inner membrane translocase subunit Tim17 (B6TP97_MAIZE)	1085.05	40.7417	1132.25	15.9592	1415.08	48.2916	1340.19	14.2889	G	turquoise	No
Solyc06g051040	Mitotic checkpoint serine/threonine-protein kinase BUB1 (BUB1_MOUSE)	94.3357	11.214	107.231	25.9052	174.869	16.4395	122.924	6.39954	G	Not in top 8000 most variable DETs	No
Solyc05g005380	Nuclear transcription factor Y subunit B-6 (B6UH02_MAIZE)	5.62189	1.61091	15.2415	3.0884	33.506	14.457	28.8786	7.24307	G	Not in top 8000 most variable DETs	No
Solyc06g035980	Actin depolymerizing factor 10 (B9I489_POPTR)	109.812	17.5409	113.683	31.006	203.671	18.4522	150.957	13.043	G	Not in top 8000 most variable DETs	No
Solyc03g112530	Guanine nucleotide-binding protein G(I)/G(S)/G(T) subunit beta-3 (GBB3_HUMAN)	203.172	12.1094	208.995	6.09888	282.507	20.431	248.695	8.34852	G	Not in top 8000 most variable DETs	No
Solyc08g082340	Glycerol-3-phosphate acyltransferase 3 (GPAT3_HUMAN)	1348.02	43.6435	1496.84	33.2152	1683.92	36.8521	1548.58	42.2333	G	turquoise	No
Solyc11g071200	Unknown Protein	48.001	2.4695	52.0156	3.50777	77.8549	4.54613	62.0484	6.31038	G	Not in top 8000 most variable DETs	No
Solyc01g096240	Homology to unknown gene (Q01FV7_OSTTA)	3372.92	59.3862	2791.29	245.96	2368.88	142.724	2577.4	38.2515	G	yellow	No
Solyc07g043710	Acyltransferase (Q58VT0_CAPCH)	103.533	10.822	131.439	30.0093	192.944	14.696	196.213	25.6738	G	Not in top 8000 most variable DETs	No
Solyc08g080510	Replication factor C subunit 4 (B6TA83_MAIZE)	279.589	12.0478	298.36	5.17901	425.283	31.1475	381.855	7.32123	G	Not in top 8000 most variable DETs	No
Solyc01g066040	Unknown Protein	5.14299	2.19234	10.2482	1.70375	15.7761	0.923439	15.9544	1.61427	G	Not in top 8000 most variable DETs	No
Solyc08g006760	Unknown Protein	505.454	18.4699	461.782	38.6816	385.352	31.9981	448.998	15.2659	G	Not in top 8000 most variable DETs	No
Solyc07g043240	Pectinesterase (B9S4Z6_RICCO)	349.528	20.5324	311.701	12.0568	187.813	50.1182	215.233	21.8664	G	turquoise	No
Solyc08g076310	Uncharacterized membrane protein C2G11.09 (YAB9_SCHPO)	1738.34	31.8156	1422.21	64.9705	1078.85	46.2572	1180.04	23.2148	G	turquoise	No
Solyc10g006250	Swap (Suppressor-of-White-APricot)/surp domain-containing protein (D7MUZ7_ARALY)	1050.38	16.848	1190.28	26.0905	1365.57	96.0992	1420.51	73.5608	G	turquoise	No
Solyc05g052250	Expansin 2 (C0LU46_CITSI)	17.8063	3.65204	47.8494	15.93	73.4858	9.71737	93.9229	18.9589	G	Not in top 8000 most variable DETs	No
Solyc02g081330	phytoene synthase 2 (manually curated)	1131.98	31.2484	1083.22	103.659	753.113	54.2218	957.236	24.3241	G	blue	No
Solyc07g056320	ER glycerol-phosphate acyltransferase (B9T753_RICCO)	179.507	21.8867	146.007	13.5369	75.6022	15.451	93.5027	20.8563	G	Not in top 8000 most variable DETs	No
Solyc03g083540	Methylosome subunit pICln (B4FU22_MAIZE)	235.356	12.9839	271.856	13.0678	374.909	24.9046	319.138	10.3691	G	Not in top 8000 most variable DETs	No
Solyc02g077570	MLO-like protein 6 (C6EWE7_VITVI)	35.5942	5.72688	34.0888	3.15346	15.4468	3.32921	24.5199	5.55421	G	Not in top 8000 most variable DETs	No
Solyc01g087040	Thylakoid lumenal 19 kDa protein, chloroplastic (TL19_ARATH)	1871.85	165.698	1496.06	83.7421	1270.1	83.5187	1498.48	28.0958	G	yellow	No
Solyc01g099670	meloidogyne-induced giant cell protein db212 (manually curated)	5128.32	93.1869	5268.03	57.4838	7109.56	424.234	6284.65	198.319	G	turquoise	No
Solyc11g065740	RbcX protein (Q5W3L8_9NOST)	281.873	10.4192	238.194	25.5009	198.459	21.1154	217.026	11.2537	G	Not in top 8000 most variable DETs	No
Solyc12g005790	Peroxidase 27 (D7LAI1_ARALY)	63.634	10.0015	72.9021	17.1085	144.575	18.088	109.974	9.74548	G	Not in top 8000 most variable DETs	No
Solyc07g053660	WD repeat protein (C4MAV3_ENTHI)	766.282	9.46126	751.633	24.1812	966.651	31.7122	839.466	7.78461	G	turquoise	No
Solyc03g032070	Holliday junction ATP-dependent DNA helicase ruvB (D0N0A1_PHYIN)	1152.02	26.6618	1210.36	12.3937	1483.78	45.6166	1416.64	47.7031	G	purple	No
Solyc02g005200	PsaB translation factor (Fragment) (A4S2E4_OSTLU)	1973.92	27.3701	1930.87	72.203	1413.63	52.9123	1703.14	35.4014	G	blue	No
Solyc03g115770	Timing of CAB expression-like	2155.6	70.4283	1648.75	505.251	1197.65	21.1351	1757.56	79.9742	G	yellow	No
Solyc07g007200	Ring finger protein 12 (Q4V889_RAT)	88.4005	10.1104	98.2863	9.79119	127.817	5.66266	117.574	5.08712	G	Not in top 8000 most variable DETs	No
Solyc09g074050	Oxidoreductase (D7M3B5_ARALY)	884.123	31.076	900.242	29.1992	1119.1	37.0188	965.669	50.0347	G	turquoise	No
Solyc07g009020	Unknown Protein	32.8183	1.55383	21.847	8.93487	5.14309	2.10077	4.03106	1.48384	G	Not in top 8000 most variable DETs	No
Solyc07g043510	Cysteine-type peptidase (B6U3W2_MAIZE)	415.726	21.764	376.443	29.9722	271.288	12.4081	314.154	14.4586	G	Not in top 8000 most variable DETs	No
Solyc09g009550	Hydrolase alpha/beta fold family protein (D7LIQ3_ARALY)	221.072	15.9477	193.415	20.8415	141.243	10.9057	140.409	14.2088	G	Not in top 8000 most variable DETs	No
Solyc02g084900	Cell division protease ftsH homolog (FTSH_BACPE)	450.525	32.9114	392.194	22.8343	324.514	19.7855	402.978	28.5834	G	Not in top 8000 most variable DETs	No
Solyc07g053980	Glucan synthase like 1 (D8R536_SELML)	2337.75	38.1324	2679.81	41.4494	2856.73	239.149	2940.35	40.1103	G	turquoise	No
Solyc03g112150	Elongation factor Tu (D7MFK2_ARALY)	6417.78	273.379	5625.24	329.321	5124.39	199.685	5563.25	174.815	G	yellow	Yes
Solyc01g098400	Histidine phosphotransfer protein (B9I823_POPTR)	1231.42	14.4085	942.121	99.5298	942.662	39.7055	1104.85	78.3308	G	yellow	No
Solyc03g114250	Phosphoglycerate mutase family protein (B6TTB7_MAIZE)	555.588	29.3929	494.352	40.3596	408.726	23.0397	505.171	20.5598	G	Not in top 8000 most variable DETs	No
Solyc04g072110	Microsomal signal peptidase subunit(SPC25)-like protein (Q6Z7E3_ORYSJ)	1273.19	47.9609	1373.71	44.1017	1587.46	88.1741	1554.81	53.3924	G	turquoise	No
Solyc04g064850	Transmembrane protein 34 (A5D9H3_BOVIN)	135.268	7.43311	160.124	11.4804	213.057	16.665	190.457	6.08641	G	Not in top 8000 most variable DETs	No
Solyc01g080460	Pyruvate phosphate dikinase (Q84N32_SORBI)	4175.68	214.446	4748.33	438.318	5850.3	509.153	5985.05	404.6	G	turquoise	No
Solyc06g034370	Pectinesterase (B9T3X5_RICCO)	81.8705	5.99998	58.5572	10.078	26.0475	2.07068	44.3815	3.26045	G	Not in top 8000 most variable DETs	No
Solyc05g014240	Pto-like, Serine/threonine kinase protein, resistance protein	648.863	19.8153	641.98	21.3172	499.235	26.9127	570.164	23.651	G	Not in top 8000 most variable DETs	No
Solyc02g085920	Homology to unknown gene (Q00YZ4_OSTTA)	635.954	19.5022	691.223	5.91993	872.554	35.7507	844.671	32.1258	G	turquoise	No
Solyc06g069380	Os03g0169000 protein (Fragment) (Q0DUS7_ORYSJ)	509.207	44.1922	527.186	25.1559	358.773	23.8745	442.027	23.5089	G	blue	No
Solyc01g087780	serine protease SBT4A (manually curated)	2895.85	143.936	2406.34	147.168	1800.69	52.8627	1986.99	50.679	G	greenyellow	No
Solyc12g098590	UDP-glucosyltransferase family 1 protein (C6KI42_CITSI)	236.757	38.6635	94.4671	33.3585	101.731	8.75813	123.213	28.1468	G	Not in top 8000 most variable DETs	No
Solyc08g065490	Serine hydroxymethyltransferase (B9S1D7_RICCO)	779.601	32.2227	760.605	27.1561	1051.92	52.8044	895.067	31.7114	G	turquoise	No
Solyc09g014480	Polygalacturonase inhibitor protein (Q40160_SOLLC)	147.555	5.41019	115.018	4.52939	88.4873	9.5945	82.7556	5.99168	G	Not in top 8000 most variable DETs	No
Solyc10g055680	Ubiquinone/menaquinone biosynthesis methyltransferase ubiE (UBIE_BRUME)	563.249	13.1428	603.865	53.7892	724.787	17.0051	681.237	47.6942	G	turquoise	No
Solyc09g066260	LOB domain protein-like (Q6K713_ORYSJ)	24.5252	4.26028	14.1709	2.7632	4.3408	0.817053	3.14402	1.55952	G	Not in top 8000 most variable DETs	No
Solyc08g075400	SWIB/MDM2 domain protein (B0UB94_METS4)	256.492	5.78915	244.024	11.1587	343.115	17.9131	281.909	8.77283	G	Not in top 8000 most variable DETs	No
Solyc01g060130	TOMGTPASE Mill. GTPase (manually curated)	378.026	17.4345	385.399	18.4571	520.512	21.3727	425.213	6.43924	G	Not in top 8000 most variable DETs	No
Solyc05g005070	RLK, Receptor like protein, putative resistance protein with an antifungal domain	228.351	2.90245	259.863	29.1453	148.735	7.87467	201.294	19.6036	G	Not in top 8000 most variable DETs	No
Solyc06g065390	50S ribosomal protein L21 (B6U3Z0_MAIZE)	9647	280.812	7989.05	335.261	7589.83	431.03	7816.2	359.747	G	turquoise	No
Solyc02g091190	Methyltransferase-like protein 10 (B5XB96_SALSA)	1249.21	25.5677	1422.17	26.0766	1588.69	66.1379	1487.17	37.529	G	greenyellow	No
Solyc08g077850	tRNA/rRNA methyltransferase SpoU family protein (Q54XF8_DICDI)	358.952	14.7329	390.367	14.668	551.498	70.9846	458.634	19.8781	G	yellow	No
Solyc08g066690	Exostosin family protein (D7M9P2_ARALY)	7.64063	0.905161	7.23498	2.2306	27.0383	3.91016	17.7354	2.93694	G	Not in top 8000 most variable DETs	No
Solyc04g081090	V-type proton ATPase 16 kDa proteolipid subunit c2 (VATL2_ARATH)	3671.05	271.448	4183.34	160.38	5424.82	168.329	4830.72	283.555	G	turquoise	No
Solyc05g053790	UDP-D-glucuronate 4-epimerase 4 (D7LCH5_ARALY)	30.1396	2.19103	30.6107	5.03643	73.9387	15.1066	39.3406	6.63861	G	Not in top 8000 most variable DETs	No
Solyc09g082130	Unknown Protein	437.163	14.3262	476.14	20.4471	543.967	18.8457	549.577	19.1242	G	Not in top 8000 most variable DETs	No
Solyc02g092210	Alpha-6-galactosyltransferase (Q5TIN2_SOLTU)	378.442	20.1714	412.994	27.1182	507.922	34.89	462.035	16.2333	G	Not in top 8000 most variable DETs	No
Solyc01g108840	Receptor like kinase, RLK	2034.61	55.6937	1994.04	66.5539	1632.21	71.2503	1780.01	44.7774	G	turquoise	No
Solyc02g087770	Aldose-1-epimerase-like protein (O48971_TOBAC)	807.61	13.7598	715.679	27.0836	594.787	36.0741	545.093	17.0649	G	turquoise	No
Solyc10g049420	Unknown Protein	89.9424	6.48874	68.2215	3.06946	46.2052	4.62992	46.126	5.38264	G	Not in top 8000 most variable DETs	No
Solyc11g066520	Serine carboxypeptidase family protein expressed (Q10K92_ORYSJ)	1131.29	62.3933	994.029	51.4294	898.539	28.0319	840.783	28.8912	G	turquoise	No
Solyc02g080380	Derlin-2 (B6TKJ7_MAIZE)	1167.86	20.0589	1237.18	17.2038	1443.59	14.7053	1356.68	24.3113	G	turquoise	No
Solyc10g075100	Non-specific lipid-transfer protein (Q4A1N1_SOLLC)	3375.87	239.164	3252.06	185.926	2263.26	120.163	2810.62	147.666	G	purple	No
Solyc02g086160	plastidic glucose translocator 1 (manually curated)	2613.69	112.222	2317.7	65.6521	2140.44	54.0077	2288.96	85.6889	G	yellow	No
Solyc09g064500	Photosystem II reaction center psb28 protein (C6SZM2_SOYBN)	2520.58	85.3772	2143.28	199.476	1689.72	164.681	2146.9	41.2729	G	yellow	No
Solyc02g083190	F-box family protein (B9HR11_POPTR)	58.8461	2.05678	50.1445	1.56274	28.0844	1.77634	34.1064	3.72279	G	Not in top 8000 most variable DETs	No
Solyc07g006040	Unknown Protein	35.4318	2.11281	37.3805	3.4079	18.0213	3.08941	21.5519	3.05428	G	Not in top 8000 most variable DETs	No
Solyc01g005040	Unknown Protein; contains Interpro domain(s) IPR006702 Uncharacterised protein family UPF0497, trans-membrane plant	11.854	2.21194	9.74452	2.07033	1.87496	1.53025	1.94192	0.931403	G	Not in top 8000 most variable DETs	No
Solyc06g064960	GDSL esterase/lipase 5 (GLIP5_ARATH)	102.166	20.422	179.78	52.1419	219.881	28.992	121.176	18.0025	G	Not in top 8000 most variable DETs	No
Solyc06g053920	Os11g0586300 protein (Fragment) (Q0IRY4_ORYSJ)	523.002	19.0303	547.526	4.19982	359.201	19.5956	459.182	13.8574	G	Not in top 8000 most variable DETs	No
Solyc04g079930	Os10g0358600 protein (Fragment) (Q0IY80_ORYSJ)	686.017	14.2154	635.315	44.689	491.308	21.1759	553.186	20.8043	G	turquoise	No
Solyc04g009430	NAD-dependent deacetylase (D4SZS6_9XANT)	1038.61	103.987	1343.55	263.031	506.886	32.8056	911.342	72.1523	G	blue	No
Solyc03g033390	F-box family protein (B9H220_POPTR)	447.925	8.60163	440.802	10.5207	572.68	31.8209	469.929	8.93428	G	Not in top 8000 most variable DETs	No
Solyc02g071790	Receptor-like serine/threonine kinase (C6FF81_SOYBN)	641.966	40.2826	613.583	43.2448	471.777	24.0825	505.166	42.7409	G	turquoise	No
Solyc04g009630	Alpha-glucosidase 1 (O22444_ARATH)	997.434	30.4732	829.972	65.0078	616.828	14.1672	748.243	22.1107	G	blue	No
Solyc01g099030	GDSL esterase/lipase At1g28590 (GDL8_ARATH)	80.4933	5.87378	76.7766	7.45747	52.416	3.10353	65.8964	7.64812	G	Not in top 8000 most variable DETs	No
Solyc01g111570	Receptor-like kinase (A7VM42_MARPO)	765.55	31.2346	674.791	87.9564	467.497	11.0089	603.467	18.1747	G	blue	No
Solyc01g108250	DEM2 (manually curated)	963.321	43.8901	977.723	25.6326	683.552	33.0093	873.875	48.7184	G	turquoise	No
Solyc04g009410	Proteasome subunit beta type (C6SXW4_SOYBN)	2307.51	95.4794	2404.18	79.8956	3063.26	119.786	2763.84	66.6208	G	turquoise	No
Solyc07g043570	Aldo/keto reductase family protein (D7KG57_ARALY)	1551.75	18.736	1382.39	62.2764	1147.3	74.5815	1389.62	23.3847	G	yellow	No
Solyc09g072560	Legumin 11S-globulin (Q39770_GINBI)	2.78355	0.718935	3.91519	1.00661	18.9577	1.90173	9.44147	2.15573	G	Not in top 8000 most variable DETs	Yes
Solyc10g080130	Exosome complex exonuclease RRP43 (B4FDY3_MAIZE)	382.497	23.349	500.793	57.0078	605.155	51.6308	436.985	59.4599	G	yellow	No
Solyc05g053660	BHLH transcription factor (Q401N4_9LILI)	83.7064	7.16433	69.0429	10.7662	44.6344	3.70651	46.8283	2.4575	G	Not in top 8000 most variable DETs	No
Solyc01g103350	Cell division protein kinase 13 (CDK13_MOUSE)	651.943	11.1627	758.967	56.8095	871.159	11.9307	841.996	13.9838	G	turquoise	No
Solyc02g094030	Unknown Protein	687.761	20.6788	581.284	39.5368	510.917	20.9599	539.201	5.46674	G	Not in top 8000 most variable DETs	No
Solyc11g010980	Alcohol dehydrogenase (ADH2_BACST)	29.3739	7.01822	40.1808	4.71788	72.0729	2.32509	47.139	3.88439	G	Not in top 8000 most variable DETs	No
Solyc02g069080	Unknown Protein	1030.31	36.9926	1125.24	6.68527	1269.69	57.1435	1261.28	36.9525	G	turquoise	No
Solyc01g111670	Unknown Protein; contains Interpro domain(s) IPR009688 Protein of unknown function DUF1279	244.581	17.0691	268.142	11.2969	326.107	13.6174	303.11	17.5592	G	Not in top 8000 most variable DETs	No
Solyc08g080670	Pathogenesis-related 5-like protein (manually curated)	7230.6	249.642	9327.25	619.664	9537.3	346.435	8946.85	824.01	G	yellow	No
Solyc09g014350	Glycerol-3-phosphate acyltransferase 6 (D7LKT2_ARALY)	131.224	11.3649	95.4727	3.86481	75.5813	11.6117	68.8874	4.15564	G	Not in top 8000 most variable DETs	No
Solyc06g076230	Unknown Protein	630.945	36.5109	568.149	29.1819	410.506	34.019	499.779	25.7746	G	yellow	No
Solyc07g007180	RING-H2 finger protein (B6TJA7_MAIZE)	267.824	7.54029	211.55	12.3854	179.916	15.6437	173.309	5.74217	G	Not in top 8000 most variable DETs	No
Solyc11g064790	Signal peptide peptidase family protein (D7LQE4_ARALY)	1063.35	25.4552	1119.29	11.2411	1349.66	72.6817	1294.15	65.9269	G	turquoise	No
Solyc10g074440	Endochitinase (Chitinase) (Q43184_SOLTU)	27.0341	4.51123	22.0356	3.24668	7.13182	3.09902	13.8869	4.08581	G	Not in top 8000 most variable DETs	No
Solyc01g101050	Peroxidase 1 (B6T173_MAIZE)	13.7128	0.68905	11.2433	3.72915	2.21936	0.431214	2.16472	0.858611	G	Not in top 8000 most variable DETs	No
Solyc08g015660	6 7-dimethyl-8-ribityllumazine synthase (Q5ZQU1_TOBAC)	711.293	47.836	612.925	22.6481	526.716	6.72607	509.571	13.2068	G	greenyellow	No
Solyc01g106690	Unknown Protein; contains Interpro domain(s) IPR010410 Protein of unknown function DUF1005	818.219	17.8458	847.441	154.139	1220.77	34.8213	1022	75.3058	G	blue	No
Solyc01g091010	YABBY-like transcription factor CRABS CLAW-like protein (Q6SRZ7_ANTMA)	1175.51	47.4613	1062.87	40.78	864.931	30.9999	959.016	27.1541	G	yellow	No
Solyc03g058370	UDP-glucosyltransferase family 1 protein (C6KI44_CITSI)	21.5433	3.01617	17.2103	4.39791	9.39079	1.12512	16.8464	1.85324	G	Not in top 8000 most variable DETs	No
Solyc11g008620	Phosphoglycolate phosphatase (C1FHY2_9CHLO)	1791.81	28.3993	1379.19	89.8226	1035.17	96.6834	1125.78	38.5466	G	yellow	No
Solyc06g009670	DNAJ heat shock N-terminal domain-containing protein (D7M452_ARALY)	381.683	11.2938	381.418	61.2126	510.041	6.1751	418.272	17.0741	G	Not in top 8000 most variable DETs	No
Solyc06g048790	Os12g0109700 protein (Fragment) (C7JA22_ORYSJ)	46.8527	9.1573	86.3754	26.9645	119.294	6.84219	112.345	12.6068	G	Not in top 8000 most variable DETs	No
Solyc09g011660	Universal stress protein 1 (B0YQX0_GOSAR)	1377.93	40.4949	1403.95	79.4293	2004.91	135.589	1718.19	114.252	G	turquoise	No
Solyc02g092270	NADH dehydrogenase (NDUS4_RAT)	3659.68	77.3704	3567.76	28.8832	4427.01	182.634	4266.54	123.212	G	turquoise	No
Solyc02g094390	Palmitoyltransferase-like protein (C6YXK4_ORYSJ)	2321.63	35.5796	2075.18	111.63	1840.94	76.4073	1902.07	94.9582	G	turquoise	No
Solyc08g007600	Subtilisin-like protease (Q9LWA3_SOLLC)	36.0367	1.79146	69.2202	29.2346	98.5334	4.48252	87.821	5.05619	G	Not in top 8000 most variable DETs	No
Solyc05g012510	Phosphorylase (B9HXL0_POPTR)	170.732	7.65498	112.027	19.6643	77.1675	11.1058	108.249	7.89913	G	Not in top 8000 most variable DETs	No
Solyc08g081890	Multidrug resistance protein ABC transporter family (B9GX56_POPTR)	1379.15	43.5773	1100.1	114.126	1052.57	40.7141	1123.78	41.9049	G	yellow	No
Solyc01g098990	Os06g0146300 protein (Fragment) (Q0DEL6_ORYSJ)	1415.79	28.7908	1296.93	40.9333	1113.42	89.3423	1276.44	15.43	G	yellow	No
Solyc05g046330	Dolichyl-diphosphooligosaccharide--protein glycosyltransferase subunit 2 (RPN2_HUMAN)	1763.58	37.0726	1889.5	88.3975	2370.9	137.988	2241.6	92.8514	G	turquoise	No
Solyc02g090180	Oligopeptidase (Protease II) (A6EDE8_9SPHI)	124.476	7.72589	128.147	7.33957	173.918	6.20965	128.371	14.6391	G	Not in top 8000 most variable DETs	No
Solyc05g018650	Ferrochelatase (O64391_SOLTU)	3051.88	67.2794	2722.17	147.122	2304.37	34.5761	2592.91	46.3548	G	blue	No
Solyc04g005860	cDNA clone J075153F01 full insert sequence (B7F9A7_ORYSJ)	4353.09	100.539	3473.58	395.851	3392.67	103.564	3782.29	151	G	yellow	No
Solyc12g036170	Unknown Protein	1198.41	46.1765	942.076	94.7406	758.013	91.5792	867.774	32.5869	G	yellow	No
Solyc03g094120	Os03g0849800 protein (Fragment) (Q0DLS4_ORYSJ)	22.0896	2.64951	13.8831	2.98678	5.57332	1.0077	7.23646	3.27924	G	Not in top 8000 most variable DETs	No
Solyc11g045310	MADS box protein (Q84KS1_TOBAC)	412.213	11.0863	367.429	16.3704	305.167	8.2257	314.191	11.748	G	Not in top 8000 most variable DETs	No
Solyc10g045640	Transmembrane emp24 domain-containing protein 10 (B6SSF8_MAIZE)	390.4	16.718	413.566	10.3856	525.733	8.71429	483.258	17.4291	G	Not in top 8000 most variable DETs	No
Solyc04g007270	PHD finger family protein (D7KII6_ARALY)	1425.87	55.7924	1687.18	82.2226	1858.86	90.1456	1843.55	40.8565	G	turquoise	No
Solyc10g005060	O-methyltransferase-like protein (D3JZ18_PRUMU)	3769.35	63.4676	3338.04	140.443	2948.33	159.392	2958.67	54.2618	G	turquoise	No
Solyc10g011670	Mitochondrial carrier-like protein (Q2PYY0_SOLTU)	1007.76	26.0462	1182.92	28.2413	1536.11	41.7314	1359.56	43.9197	G	turquoise	No
Solyc04g007990	Unknown Protein	191.333	15.7776	161.859	25.9282	103.317	9.69718	148.631	14.1655	G	Not in top 8000 most variable DETs	No
Solyc10g079000	Transmembrane and coiled-coil domain-containing protein 1 (B0WCQ4_CULQU)	728.28	17.8396	758.095	35.8237	982.237	53.341	837.27	44.9695	G	turquoise	No
Solyc06g073150	COP9 signalosome complex subunit 5b (B4FUK9_MAIZE)	496.15	21.207	506.751	13.0828	664.249	31.2675	626.503	8.89349	G	turquoise	No
Solyc05g055510	Pectate lyase family protein (D7LXH4_ARALY)	123.798	6.03478	145.627	3.2621	177.764	8.83924	145.611	10.852	G	Not in top 8000 most variable DETs	No
Solyc08g068310	RNA-binding La domain protein (B8NID1_ASPFN)	1118.12	10.2792	1087.18	23.4563	1503.49	59.4646	1286.07	26.8316	G	turquoise	No
Solyc11g010110	Ribosomal RNA small subunit methyltransferase F (RSMF_SHESH)	1689.65	40.238	1756.54	36.2809	2053.58	59.5516	2111.32	70.5036	G	turquoise	No
Solyc12g014110	Sodium/calcium exchanger family protein (D7KKF3_ARALY)	860.819	19.0145	937.487	58.0583	1102.98	41.0591	1078.43	17.3815	G	turquoise	No
Solyc04g071590	Abscisic acid stress ripening 3 (manually curated)	27.8519	6.11377	24.7909	8.63876	4.00942	1.42146	6.12931	1.60116	G	Not in top 8000 most variable DETs	No
Solyc01g080000	Xylanase inhibitor (Fragment) (Q53IQ3_WHEAT)	1.88929	1.32183	0.77655	0.480267	29.3838	9.35183	4.43673	2.28123	G	Not in top 8000 most variable DETs	No
Solyc08g075990	Os02g0129300 protein (Fragment) (Q0E498_ORYSJ)	310.686	19.2922	248.704	18.8395	208.838	17.2322	247.214	8.18406	G	Not in top 8000 most variable DETs	No
Solyc04g080080	Glycosyltransferase family 77 protein (C1N277_MICPS)	890.63	16.7184	949.127	41.6754	1209.51	43.1614	1090.35	26.0151	G	turquoise	No
Solyc05g007510	RNA-directed RNA polymerase (manually curated)	196.194	20.621	166.764	10.658	98.9816	16.725	133.842	9.6097	G	Not in top 8000 most variable DETs	No
Solyc03g117850	Ribulose bisphosphate carboxylase/oxygenase activase (B6T416_MAIZE)	677.742	22.2521	832.541	70.4538	461.545	47.8718	702.172	22.0935	G	pink	No
Solyc08g014290	Serine-threonine protein phosphatase (Q5CPY7_CRYPV)	369.985	7.94534	319.552	10.8588	286.347	9.57359	319.888	13.4776	G	Not in top 8000 most variable DETs	No
Solyc08g062660	Ran binding protein-1 (manually curated)	3340.5	17.4406	3555.79	55.6973	4358.42	201.045	3903.76	63.5493	G	turquoise	No
Solyc09g009690	Ribonucleoside hydrolase 1 (D1RWC6_SEROD)	1646	45.3934	1950.59	112.013	2153.18	60.9936	1792.58	58.7973	G	yellow	No
Solyc09g075060	Beta-glucosidase (D7L7Z3_ARALY)	75.2713	7.69258	56.0466	5.88711	30.6855	6.35039	35.3365	2.54034	G	Not in top 8000 most variable DETs	No
Solyc01g008820	Signal peptide peptidase family protein (D7LQE4_ARALY)	1115.52	22.768	1133.22	25.725	1438.32	50.4408	1295.53	59.8965	G	turquoise	No
Solyc07g039310	Polyamine oxidase (Q8LL67_AMAHP)	178.567	4.24363	169.175	9.90596	122.612	5.28977	135.981	6.96188	G	Not in top 8000 most variable DETs	No
Solyc08g014280	Calmodulin-binding protein family-like (Q6YXT2_ORYSJ)	1128.16	79.3099	962.013	35.7316	841.964	28.3301	844.633	14.256	G	greenyellow	No
Solyc12g011370	Amino acid transporter (C2SWS0_BACCE)	481.58	18.0349	505.529	17.371	348.404	32.614	460.886	24.057	G	Not in top 8000 most variable DETs	No
Solyc07g024000	Dehydrogenase/ reductase 3 (Q3INM6_NATPD)	1644.07	64.4535	1461.09	112.337	1207.44	50.1325	1388.64	29.6854	G	yellow	No
Solyc02g064550	C1orf93 homolog (C1C416_RANCA)	257.316	18.2081	229.609	12.9091	167.871	9.18046	189.127	6.95868	G	Not in top 8000 most variable DETs	No
Solyc05g051570	Ras-related protein Rab-6A (B6STE7_MAIZE)	388.847	18.9001	488.761	37.1521	510.192	20.0528	492.969	9.94498	G	Not in top 8000 most variable DETs	No
Solyc08g062360	Ankyrin repeat protein (B1Q4U3_9ROSI)	19.1807	3.02802	24.645	5.99664	6.95488	1.25691	15.5638	3.81776	G	Not in top 8000 most variable DETs	No
Solyc11g020060	Glyoxylate reductase/hydroxypyruvate reductase (GRHPR_MOUSE)	161.888	6.35137	176.024	8.19271	220.705	12.0228	197.285	7.79471	G	Not in top 8000 most variable DETs	No
Solyc11g018580	Long-chain-fatty-acid--CoA ligase 4 (C0HA93_SALSA)	1018.96	29.9245	971.275	63.0544	779.686	37.4656	890.229	62.538	G	turquoise	No
Solyc08g013850	Pentatricopeptide repeat-containing protein (D7MKK8_ARALY)	305.533	7.0155	247.715	32.1239	185.016	7.6043	214.298	11.35	G	Not in top 8000 most variable DETs	No
Solyc00g157180	cDNA clone J033046E14 full insert sequence (B7EM90_ORYSJ)	11.6673	1.97874	11.908	0.992758	26.7543	5.24974	13.0976	1.14041	G	Not in top 8000 most variable DETs	No
Solyc08g077050	Ferredoxin family protein (D7KHL5_ARALY)	2170.76	36.3925	1840.06	154.989	1625.36	83.0137	1957.64	56.3146	G	yellow	No
Solyc06g011350	plasma membrane intrinsic protein 2.4 (manually curated)	872.605	52.9897	1091.79	111.65	1376.44	70.9855	1173.01	37.8466	G	turquoise	No
Solyc12g005400	Cyclic nucleotide gated channel (A9CRE4_MALDO)	865.728	24.9194	765.481	38.1514	531.371	58.0929	701.822	56.236	G	turquoise	No
Solyc03g098600	Oligosaccharyl transferase STT3 subunit (B6T514_MAIZE)	2584.09	42.3774	2571.77	70.0794	3151.9	181.754	2992.07	68.0267	G	turquoise	No
Solyc01g113450	Unknown Protein	5.51547	1.34012	7.82936	1.61393	23.1755	7.53837	10.6621	2.13593	G	Not in top 8000 most variable DETs	No
Solyc07g026770	Mitochondrial ATP synthase g subunit family protein (D7MFB8_ARALY)	2663.32	14.4972	2754.19	74.8471	3529.31	163.498	3149.18	84.5549	G	turquoise	No
Solyc06g007540	Cytochrome b-c1 complex subunit 8 (D6BQP2_9ROSI)	1681.37	63.7255	1696.53	68.1141	2447.98	209.931	2050.64	66.9421	G	turquoise	No
Solyc12g008980	ob811-LELYCOCYC lycopene epsilon-cyclase (manually curated)	1977.73	12.758	1765	39.5927	1487.69	109.069	1726.82	99.797	G	yellow	No
Solyc04g076420	dsRNA-binding protein (manually curated)	402.524	15.0914	440.535	15.0687	536.754	17.9791	524.172	23.0591	G	Not in top 8000 most variable DETs	No
Solyc07g064250	Protein disulfide isomerase (Q5EUD1_MAIZE)	1221.38	28.0945	1192.32	43.4267	1587.45	77.546	1352.68	105.186	G	turquoise	No
Solyc07g005540	Receptor like kinase, RLK	1155.32	34.8441	1096.83	34.0496	859.749	26.5831	925.993	49.5402	G	turquoise	No
Solyc08g076220	Phosphoribulokinase/uridine kinase (B7KI62_CYAP7)	18760	226.571	15285.9	471.363	14878.9	639.053	17669.4	767.631	G	yellow	No
Solyc02g069130	Peptidyl-prolyl cis-trans isomerase (B1WW43_CYAA5)	709.53	36.0795	602.659	35.6067	484.922	35.8254	540.859	12.4723	G	yellow	No
Solyc02g071710	GDSL esterase/lipase At1g29670 (GDL15_ARATH)	22.5697	4.44373	14.3121	1.79872	8.3474	1.91814	4.19812	1.14213	G	Not in top 8000 most variable DETs	No
Solyc12g014010	Glucosyltransferase (Q8RU72_TOBAC)	1818.86	373.233	1306.93	151.41	821.192	99.1508	1148.81	193.664	G	blue	No
Solyc09g061940	Receptor like kinase, RLK	36.641	3.24666	59.0353	6.74398	128.173	27.3694	82.9974	10.7696	G	Not in top 8000 most variable DETs	No
Solyc06g074330	Hydrolase alpha/beta fold family protein (D7LRW3_ARALY)	886.021	24.1019	886.128	13.3964	1087.48	20.3617	987.614	26.8226	G	blue	No
Solyc01g088150	Glycerol-3-phosphate dehydrogenase-like protein (Q8S2G5_ORYSJ)	581.654	14.6128	530.237	24.8806	755.923	54.8564	652.109	17.5982	G	turquoise	No
Solyc07g049440	GDSL esterase/lipase At2g04570 (GDL34_ARATH)	88.2683	4.46391	69.2265	7.78363	37.3934	2.97605	54.7491	6.04944	G	Not in top 8000 most variable DETs	No
Solyc12g020050	DNA-binding protein DQ117941 (manually curated)	1179.23	30.9515	1181.32	35.1642	1532.95	66.8636	1348.93	14.4681	G	turquoise	No
Solyc09g075840	Unknown Protein	25.3071	1.34619	28.0309	2.23351	7.82484	1.90139	16.1154	2.51278	G	Not in top 8000 most variable DETs	No
Solyc12g094450	Peroxisomal multifunctional enzyme type 2 (B4FP93_MAIZE)	805.512	28.9275	815.445	35.2736	1088.77	98.2605	972.671	67.3757	G	turquoise	No
Solyc07g007690	Voltage-gated chloride channel (Q96325_ARATH)	280.262	9.94747	267.267	13.6517	371.708	11.2757	294.817	17.7697	G	Not in top 8000 most variable DETs	No
Solyc04g077580	Unknown Protein; contains Interpro domain(s) IPR009438 Phytosulfokine	2.13741	1.00999	10.4778	3.33859	25.622	8.16724	11.3148	4.34631	G	Not in top 8000 most variable DETs	No
Solyc09g082890	Calcium-transporting ATPase 1 (Q7XBH9_CERRI)	37.9845	6.75913	36.5386	4.14961	15.2005	3.20303	29.9768	5.02976	G	Not in top 8000 most variable DETs	No
Solyc12g014230	DAG protein (B6TDH1_MAIZE)	585.475	20.235	576.746	21.0553	824.112	51.7498	693.217	15.6236	G	turquoise	No
Solyc04g078010	Unknown Protein; contains Interpro domain(s) IPR001944 Glycoside hydrolase, family 35	131.79	6.95825	187.987	5.8566	287.259	35.3001	216.646	16.3754	G	Not in top 8000 most variable DETs	No
Solyc10g080320	Adenylosuccinate synthetase (Q9FYW9_SOLLC)	1166.68	40.3434	1340.34	26.2457	1568.48	35.1536	1502.14	42.4153	G	greenyellow	No
Solyc08g062330	Ankyrin repeat protein (B1Q4U3_9ROSI)	80.7086	6.64213	106.726	19.78	44.4139	5.94271	68.148	7.31619	G	Not in top 8000 most variable DETs	No
Solyc08g006800	Unknown Protein	0	0	0.539886	0.312414	18.5401	9.25036	10.19	5.94782	G	Not in top 8000 most variable DETs	No
Solyc06g082930	FRIGIDA (Fragment) (Q58T23_ARATH)	12373	335.042	11769	362.423	9393.43	842.059	10377.5	247.581	G	yellow	No
Solyc07g017760	Pentatricopeptide repeat-containing protein (D7L2S7_ARALY)	1043.53	33.2344	888.501	56.7792	737.725	28.4795	860.305	57.3178	G	blue	No
Solyc00g006800	transaldolase (manually curated)	2711.18	20.1669	3028.88	64.6084	3601.29	127.787	3580.89	156.306	G	turquoise	No
Solyc12g056770	F-actin capping protein beta subunit family protein (D7KYY1_ARALY)	443.311	12.1652	491.164	26.3404	597.162	16.4708	592.963	10.6137	G	Not in top 8000 most variable DETs	No
Solyc02g076990	Lipase-like (Q8RZ40_ORYSJ)	45.1891	3.52731	54.525	9.14347	84.2556	10.8466	64.3335	6.83309	G	Not in top 8000 most variable DETs	No
Solyc01g016470	Unknown Protein; contains Interpro domain(s) IPR001813 Ribosomal protein 60S	533.359	22.9258	525.95	14.3337	782.78	58.6758	624.524	37.4076	G	turquoise	No
Solyc05g054870	Unknown Protein	190.252	6.18668	158.27	8.32146	127.167	5.06944	159.5	6.60442	G	Not in top 8000 most variable DETs	No
Solyc07g008860	Guanine nucleotide-binding protein subunit beta-like protein (GBLP_DICDI)	342.617	9.30815	336.447	16.2416	466.681	34.3061	378.383	13.9854	G	Not in top 8000 most variable DETs	No
Solyc12g005860	3-isopropylmalate dehydratase large subunit (LEUC_BACWK)	11647.2	282.928	13366.9	655.056	14724	931.771	16109.2	475.701	G	turquoise	Yes
Solyc03g115030	Mitochondrial import receptor subunit TOM5 homolog (TOM5_ARATH)	255.846	2.83509	230.556	11.7344	393.21	26.7658	333.343	17.7679	G	Not in top 8000 most variable DETs	No
Solyc03g083390	Nuclear movement protein nudc (Q17KI6_AEDAE)	3051.86	75.6764	3225.54	113.946	3780.12	77.2066	3829.94	55.5038	G	turquoise	No
Solyc08g079720	AT-hook DNA-binding protein (Fragment) (A1DR81_CATRO)	209.543	10.9033	233.844	23.6287	301.569	11.9268	255.688	18.6733	G	Not in top 8000 most variable DETs	No
Solyc08g080000	Unknown Protein; contains Interpro domain(s) IPR016146 Calponin-homology	446.967	18.7579	433.364	28.8966	351.088	14.7669	377.998	13.1324	G	Not in top 8000 most variable DETs	No
Solyc02g094320	Actin (Q16P63_AEDAE)	1042.7	40.5724	1132.31	62.0178	1310.25	37.1269	1321.77	8.37852	G	turquoise	No
Solyc07g063740	Ferredoxin-like (Q6EP30_ORYSJ)	864.328	33.2057	880.355	53.1863	1108.58	46.9213	967.247	23.5508	G	blue	No
Solyc05g049950	Small nuclear ribonucleoprotein-associated protein B (B6T3Z9_MAIZE)	1402.82	18.8481	1377.3	36.2199	1851.39	78.072	1535.81	40.3596	G	blue	No
Solyc02g086850	RNA exonuclease 4 (B6T4V3_MAIZE)	6.16385	1.96488	13.1841	3.19263	18.9913	2.95701	14.7533	1.25635	G	Not in top 8000 most variable DETs	No
Solyc07g041970	Subtilisin-like protease (B6SZ82_MAIZE)	7827.36	184.738	8050.61	313.428	9772.91	593.431	8787.9	228.128	G	turquoise	No
Solyc01g008810	Zinc finger family protein (D7LZ79_ARALY)	482.216	19.6547	547.344	31.4185	626.043	19.1222	607.352	24.2378	G	Not in top 8000 most variable DETs	No
Solyc03g093680	Mago nashi-like protein 2 (A5H9J2_9SOLA)	1023.71	33.5127	1074.42	36.046	1264.83	49.1026	1139.76	30.6679	G	turquoise	No
Solyc03g025490	Gibberellin 20-oxidase-like protein (Q9FGV8_ARATH)	22.0641	2.72653	15.7479	3.39047	2.32247	0.845033	11.3467	0.632753	G	Not in top 8000 most variable DETs	No
Solyc04g082710	Cathepsin B-like cysteine proteinase 3 (CPR3_CAEEL)	2006.11	77	1824.18	28.5375	1419.16	195.401	1609.16	66.8843	G	turquoise	No
Solyc10g005190	Unknown Protein	64.1264	7.31261	57.5548	10.0997	113.045	8.27723	78.4008	8.72879	G	Not in top 8000 most variable DETs	No
Solyc01g066570	Genomic DNA chromosome 5 TAC clone K14A3 (Q9FGQ9_ARATH)	32.1511	2.43627	28.581	1.84138	59.4375	6.52616	38.3331	1.0032	G	Not in top 8000 most variable DETs	No
Solyc06g082010	Zinc finger transcription factor 48 (manually curated)	10.7671	1.9148	9.60832	1.60746	2.53996	0.783282	3.9983	0.520491	G	Not in top 8000 most variable DETs	No
Solyc08g007530	AT-hook motif nuclear localized protein 1 (Q8VYJ2_ARATH)	374.362	8.28505	352.07	5.59551	496.961	9.04002	406.371	14.0219	G	Not in top 8000 most variable DETs	No
Solyc09g091800	Unknown Protein	462.202	36.739	319.48	34.79	258.936	31.3708	268.781	18.7065	G	turquoise	No
Solyc11g006230	Calcium-responsive transactivator (CREST_XENLA)	177.678	15.6556	204.014	21.8457	252.319	5.46493	244.278	24.3886	G	Not in top 8000 most variable DETs	No
Solyc10g080090	HAT family dimerisation domain containing protein expressed (Q6AVI0_ORYSJ)	270.35	3.74143	293.422	7.30229	373.336	19.36	357.267	24.7377	G	Not in top 8000 most variable DETs	No
Solyc06g050900	Peptide transporter (O22305_LOTJA)	42.3359	3.96474	40.5772	4.58786	16.1612	3.73353	24.3605	3.03597	G	Not in top 8000 most variable DETs	No
Solyc09g007440	ATP-dependent RNA helicase (A1EC69_RAT)	257.144	13.3045	258.918	7.11243	355.372	19.9836	280.955	6.96788	G	Not in top 8000 most variable DETs	No
Solyc09g091010	Unknown Protein	931.014	20.349	766.612	59.9391	728.47	24.3166	804.808	35.8237	G	yellow	No
Solyc01g057090	Rhodopsin-like receptor (B6TUA3_MAIZE)	377.144	14.0613	456.443	13.0951	485.723	8.57413	452.483	18.4099	G	Not in top 8000 most variable DETs	No
Solyc01g106600	Pathogenesis-related protein 1 (D2XZ57_9ROSI)	135.15	28.7876	175.232	14.5378	74.6211	19.7295	119.938	4.10715	G	Not in top 8000 most variable DETs	No
Solyc11g072800	NADPH oxidase (Q8W4X7_TOBAC)	69.2748	6.57986	88.5287	23.8828	140.864	10.3792	100.176	13.8255	G	Not in top 8000 most variable DETs	No
Solyc04g015370	Acyl carrier protein (Q3HRX1_SOLTU)	1705.29	15.6202	1676.1	26.0019	2163.58	99.198	1877.21	97.4767	G	pink	No
Solyc02g085110	Laccase (Q9AUI0_PINTA)	635.174	36.8787	588.109	26.3583	447.545	56.8137	505.645	18.1504	G	turquoise	No
Solyc07g056050	Transmembrane 9 superfamily protein member 4 (B6U1D6_MAIZE)	3848.9	169.185	4123.05	136.33	4626.06	209.927	4565.11	150.242	G	turquoise	No
Solyc11g042460	Non-lysosomal glucosylceramidase (B9SS77_RICCO)	234.348	11.0014	300.106	32.9938	329.034	14.8866	313.581	5.80156	G	Not in top 8000 most variable DETs	No
Solyc12g009960	Eukaryotic translation initiation factor 4 (D8TN78_VOLCA)	5852.96	259.63	6816.43	182.689	7566.92	369.817	8114.25	192.592	G	turquoise	No
Solyc01g100330	Zinc finger matrin type 2 (Q6DEN8_XENTR)	376.167	18.9269	361.047	15.7623	510.466	18.9337	448.324	5.42526	G	Not in top 8000 most variable DETs	No
Solyc03g031940	Acyl-CoA synthetase/AMP-acid ligase II (D0C359_9GAMM)	6376.94	180.866	5282.41	76.9907	4619.37	166.324	5159.23	120.137	G	turquoise	No
Solyc10g080430	Phosphoribosylanthranilate transferase (Fragment) (Q43085_PEA)	94.3628	7.08804	101.876	14.933	174.696	8.32995	129.537	24.9504	G	Not in top 8000 most variable DETs	No
Solyc12g042920	Cytochrome c1 (Q9FKS5_ARATH)	866.053	31.9205	953.258	28.1332	1125.26	47.7501	1126.91	49.3494	G	turquoise	No
Solyc01g100350	ADP-ribosylation factor-like protein 3 (ARL3_CAEEL)	4396.9	268.528	4910.71	175.144	5820.59	353.433	5848.38	162.399	G	turquoise	No
Solyc06g069770	DNA-directed RNA polymerase (B9GKP9_POPTR)	687.062	5.99852	673.375	22.1721	905.921	29.0985	742.656	12.6597	G	turquoise	No
Solyc04g080230	BAC19.4 (Q9FYX2_SOLLC)	893.238	40.5955	836.708	58.7811	624.642	31.962	725.417	10.8116	G	blue	No
Solyc09g013070	3-oxo-5-alpha-steroid 4-dehydrogenase family protein expressed (Q53NE6_ORYSJ)	561.345	31.2988	474.26	18.9817	438.781	10.2969	479.415	15.1239	G	Not in top 8000 most variable DETs	No
Solyc07g061740	Ankyrin repeat family protein-like (Q6ERI3_ORYSJ)	508.846	13.9073	464.311	32.1425	333.588	34.4955	421.151	18.8844	G	Not in top 8000 most variable DETs	No
Solyc09g007950	Unknown Protein	433.313	18.9352	406.919	11.2621	340.866	9.93557	359.142	8.85581	G	Not in top 8000 most variable DETs	No
Solyc02g031710	Protein binding protein (D7L0L7_ARALY)	657.007	17.8788	546.225	14.4279	499.182	21.5867	466.568	34.4575	G	turquoise	No
Solyc05g054520	Geranylgeranyl transferase type i beta subunit (Q17K57_AEDAE)	479.583	28.2731	554.099	25.7612	620.616	18.5533	570.694	15.4003	G	Not in top 8000 most variable DETs	No
Solyc07g032510	Microspherule protein 1 (Q5BJR5_RAT)	207.617	7.49413	247.383	15.3517	324.547	22.0986	286.961	12.2456	G	Not in top 8000 most variable DETs	No
Solyc10g080350	DNA-directed RNA polymerase (B9SL65_RICCO)	974.045	20.3137	1006.52	51.2689	1247.48	84.5116	1176.53	50.6523	G	turquoise	No
Solyc04g082120	Prolyl endopeptidase (B6U134_MAIZE)	60.3766	8.34282	123.787	36.6487	261.964	54.4112	253.329	59.4565	G	greenyellow	No
Solyc04g008870	MYB transcription factor (Q9FNN6_ARATH)	353.538	2.57309	354.392	25.0054	556.963	63.028	420.472	23.747	G	turquoise	No
Solyc02g072180	Ras-related protein Rab-25 (RAB25_BOVIN)	817.065	43.6035	849.366	38.4979	1129.56	35.0202	905.234	54.893	G	turquoise	No
Solyc11g072500	Dof zinc finger protein 12 (A5HWG1_HORVD)	179.389	15.8447	203.168	17.4046	352.05	70.692	202.231	22.6465	G	turquoise	No
Solyc11g005780	BHLH transcription factor (D3Y275_BRARP)	3.52227	0.753401	7.51844	2.3849	17.6008	4.1258	16.3504	3.18516	G	Not in top 8000 most variable DETs	No
Solyc09g090980	Major allergen Mal d 1 (Q84LA7_MALDO)	1286.74	60.5148	1566.1	142.585	1839.73	122.165	1671.23	83.955	G	turquoise	No
Solyc03g005750	Genomic DNA chromosome 5 P1 clone MPL12 (Q9FL24_ARATH)	3928.6	101.438	4560.35	229.877	4832.34	337.058	4795.01	220.292	G	turquoise	No
Solyc01g008920	NAD dependent epimerase/dehydratase family protein expressed (Q10L97_ORYSJ)	243.624	6.1755	195.653	18.433	161.391	12.0455	208.652	4.99626	G	Not in top 8000 most variable DETs	No
Solyc03g097170	Cinnamoyl-CoA reductase-like protein (Q9M0B3_ARATH)	359.203	25.1745	313.841	42.7661	205.711	12.4197	241.421	31.4725	G	Not in top 8000 most variable DETs	No
Solyc06g059880	Acetolactate synthase (D7RPJ7_SOLTU)	56.631	7.09224	109.969	34.2715	193.501	13.7084	108.829	15.385	G	Not in top 8000 most variable DETs	No
Solyc12g008730	Mitochondrial ATP synthase g subunit family protein (D7MFB8_ARALY)	1710.88	21.9238	1761.64	84.9294	2515.21	162.248	2076.44	146.664	G	turquoise	No
Solyc06g073790	40S ribosomal protein S11 (D7MBM0_ARALY)	3563.63	25.1336	3237.05	61.4857	4819.86	388.403	4450.99	98.1712	G	turquoise	No
Solyc05g054920	Splicing factor arginine/serine-rich 6 (B6T453_MAIZE)	4201.84	120.166	4602.4	119.94	5451.26	205.231	5264.61	207.05	G	purple	No
Solyc05g043360	Laccase (B1PXG7_SOLLC)	63.51	8.89132	84.6613	24.0879	151.093	21.6941	107.933	16.9824	G	Not in top 8000 most variable DETs	No
Solyc02g062980	Anthocyanidin 3-O-glucosyltransferase 5 (UFOG5_MANES)	104.538	12.1922	84.1744	8.55245	71.1177	3.23851	61.7564	7.59476	G	Not in top 8000 most variable DETs	No
Solyc06g005140	Pentatricopeptide repeat-containing protein (D7M3C7_ARALY)	226.032	16.9034	222.195	7.41521	325.881	5.9005	257.547	9.9466	G	Not in top 8000 most variable DETs	No
Solyc04g011900	Os04g0639300 protein (Fragment) (Q0J9P0_ORYSJ)	820.635	17.9753	762.927	26.8569	624.383	48.494	685.827	10.7047	G	yellow	No
Solyc01g009780	LITAF-domain-containing protein (Q4U6G1_PEA)	713.316	29.5054	720.841	55.8671	544.156	20.9101	656.561	24.2942	G	blue	No
Solyc11g005000	Keratinocytes-associated protein 2 (B6SJ34_MAIZE)	668.542	23.719	765.039	28.7289	1019.04	48.4976	917.369	46.0911	G	turquoise	No
Solyc10g006770	FACT complex subunit SPT16 (D3AWW1_POLPA)	1028.69	40.0049	1230.83	26.2274	1508.82	170.975	1525.6	97.1574	G	turquoise	No
Solyc02g072000	SolycHsfA4c (manually curated)	508.032	28.9963	509.693	16.3612	381.628	15.1091	438.323	14.5274	G	Not in top 8000 most variable DETs	No
Solyc04g049360	aminodeoxychorismate synthase/glutamine amidotransferase (manually curated)	539.112	19.0959	592.88	30.1285	751.736	31.5664	690.963	25.5833	G	turquoise	No
Solyc11g043110	GDSL esterase/lipase At1g71250 (GDL28_ARATH)	58.0376	24.5927	106.581	37.2528	349.003	113.837	135.845	39.1603	G	turquoise	No
Solyc01g068470	CM0216.540.nc protein (Fragment) (B0BL99_LOTJA)	352.289	16.4821	313.022	10.0105	263.799	20.3176	286.172	7.91143	G	Not in top 8000 most variable DETs	No
Solyc12g098640	Cycloeucalenol cycloisomerase (B6TK44_MAIZE)	1538.57	53.201	1700.32	64.1685	2104.2	92.2504	1963.51	85.159	G	turquoise	No
Solyc08g068230	Pentatricopeptide repeat-containing protein (D7M4J8_ARALY)	1300.78	45.657	1365.25	43.2554	1032.88	87.5096	1148.66	49.0178	G	turquoise	No
Solyc00g218560	Unknown Protein	2.69192	0.937244	3.44603	0.958413	12.5706	3.90736	5.56065	1.24655	G	Not in top 8000 most variable DETs	No
Solyc11g007740	Ribosome-recycling factor (Q1K328_DESAC)	196.623	10.5145	183.56	6.03434	259.225	13.8533	196.572	5.07282	G	Not in top 8000 most variable DETs	No
Solyc07g007600	vacuolar-type H+-pyrophosphatase (manually curated)	23670.7	868.135	25503.3	1994.56	32481.2	1510.05	30184.8	902.202	G	turquoise	No
Solyc09g011580	Glutathione S-transferase-like protein (A8DUB0_SOLLC)	697.714	42.9342	749.265	130.646	400.426	43.2904	558.269	35.3388	G	blue	No
Solyc04g079690	Receptor-like protein kinase 2 (RCH2_ARATH)	199.989	15.5029	186.202	16.5579	286.306	14.6826	233.791	11.1202	G	Not in top 8000 most variable DETs	No
Solyc01g106390	Glutamyl-tRNA reductase (A5BZY3_VITVI)	538.053	9.44899	560.913	61.3671	747.715	67.6289	599.762	45.4591	G	turquoise	No
Solyc05g010000	Protein IDA (IDA_ARATH)	13.647	1.73306	21.33	3.76916	3.36778	1.70642	2.45851	1.03432	G	Not in top 8000 most variable DETs	No
Solyc12g014420	Glucan endo-1 3-beta-glucosidase A6 (B6TIF7_MAIZE)	684.89	29.194	597.347	21.6832	542.401	35.9096	548.165	17.7749	G	Not in top 8000 most variable DETs	No
Solyc08g080050	PGR5-like protein 1A, chloroplastic (PGL1A_ARATH)	1723.23	36.2558	1493.11	63.2699	1181.41	119.39	1332.4	15.9378	G	yellow	No
Solyc03g119140	Serine/threonine-protein kinase B-raf (BRAF_HUMAN)	2954.13	62.2361	3178.04	123.898	2448.28	90.1735	3084.01	133.507	G	blue	No
Solyc07g007210	Elongation factor like protein (Q9LNC5_ARATH)	2330.56	73.3194	2470.38	57.0441	2848.63	155.094	2865.73	60.8597	G	turquoise	No
Solyc00g009060	Hypoxanthine phosphoribosyltransferase (B4UWA8_ARAHY)	341.456	17.2266	293.32	12.5136	254.222	8.8494	258.097	13.0028	G	Not in top 8000 most variable DETs	No
Solyc12g055810	AAA-ATPase (C3TX92_BRASY)	197.794	12.5644	189.554	12.6581	289.372	8.79397	245.591	15.3065	G	Not in top 8000 most variable DETs	No
Solyc03g033320	Prolyl 4-hydroxylase alpha subunit-like protein (Q9FKX6_ARATH)	241.473	17.4162	244.336	5.87787	321.837	2.74007	306.699	13.846	G	Not in top 8000 most variable DETs	No
Solyc08g076320	Cellulose synthase-like protein (B9IPJ4_POPTR)	3463.34	76.4731	3215.79	53.2592	2637.91	184.026	3044.75	94.1003	G	blue	No
Solyc08g074560	Uncharacterized aarF domain-containing protein kinase 1 (ADCK1_CHICK)	474.186	8.92885	456.472	34.2594	344.688	4.53026	409.735	18.4451	G	Not in top 8000 most variable DETs	No
Solyc04g078540	Cathepsin B-like cysteine proteinase (CYSP_SCHMA)	15328.8	613.669	17901.7	1473.82	21260.5	808.484	20312.6	1597	G	turquoise	Yes
Solyc03g006120	DOG1 alpha splice variant (Fragment) (A0SVJ8_ARATH)	5.66188	1.66672	10.6261	2.06519	41.6898	12.5095	27.5967	6.13385	G	Not in top 8000 most variable DETs	No
Solyc06g007470	40S ribosomal protein S26 (B6TXN6_MAIZE)	4311.29	225.407	4752.05	52.355	6273.01	302.986	5539.71	135.717	G	turquoise	No
Solyc02g083790	Thaumatin-like protein (Q9ZQY9_ARATH)	439.74	20.7773	458.845	23.3904	585.14	10.7045	495.45	16.5139	G	Not in top 8000 most variable DETs	No
Solyc07g052920	Unknown Protein	354.97	11.7862	376.515	6.08939	507.912	14.9643	431.36	15.7393	G	Not in top 8000 most variable DETs	No
Solyc06g050350	Myosin heavy chain-like (Q7XIW7_ORYSJ)	434.948	16.8576	344.13	28.5013	261.044	16.7937	307.32	10.1543	G	Not in top 8000 most variable DETs	No
Solyc06g005710	cDNA clone 002-143-C11 full insert sequence (B7F1B2_ORYSJ)	1599.96	86.9297	1332.57	70.3907	1011.13	128.137	1222.99	43.2845	G	yellow	No
Solyc01g005620	oxoglutarate/malate translocator (manually curated)	7557.88	341.571	8491.32	154.703	10185.2	323.427	9862.44	422.92	G	turquoise	No
Solyc09g055230	ATP-dependent Clp protease ATP-binding subunit (A2RIW9_LACLM)	1309.1	10.9496	1302.54	46.8131	1061.62	36.7685	1134.44	19.3142	G	turquoise	No
Solyc08g079430	partialcopper-containing amine oxidase (manually curated)	699.208	26.2377	760.432	66.769	1263.57	211.931	1061.72	61.2618	G	yellow	No
Solyc06g051020	Peptide-N4-(N-acetyl-beta-glucosaminyl)asparagine amidase A (C5JGX5_AJEDS)	366.426	12.171	381.829	18.2222	262.705	11.0522	307.321	20.6257	G	Not in top 8000 most variable DETs	No
Solyc06g007910	Gibberellin regulated protein (Q2HRH3_MEDTR)	483.264	7.51422	485.43	20.0234	630.313	38.4105	499.25	42.3176	G	turquoise	No
Solyc08g016510	Proteasome subunit alpha type (C6SW82_SOYBN)	1475.57	46.3184	1530.25	49.1713	1866.04	82.454	1727.28	43.1562	G	turquoise	No
Solyc03g113020	Vacuolar protein sorting 29 (B6SUM0_MAIZE)	1694.35	65.6944	1783.22	31.2646	2094.89	54.8553	2098.05	48.7036	G	turquoise	No
Solyc03g115820	Ribulose-5-phosphate-3-epimerase (Q8S4X2_PEA)	5046.06	83.0994	4603.33	225.183	4138.92	158.425	4728.13	168.399	G	yellow	No
Solyc02g089880	Glycosyltransferase family GT8 protein (D0ECQ6_POPDE)	74.0329	2.45531	52.8256	4.79251	41.4263	3.24589	33.7983	1.939	G	Not in top 8000 most variable DETs	No
Solyc01g095720	Lipase (C1FIH0_9CHLO)	550.168	9.10024	767.864	134.473	910.791	65.8753	985.814	11.7676	G	turquoise	No
Solyc06g066170	Pinoresinol-lariciresinol reductase (A3R052_LINPE)	425.698	30.7828	350.484	9.10867	270.842	35.1641	298.984	10.168	G	Not in top 8000 most variable DETs	No
Solyc06g008500	Ankyrin repeat-containing protein (D2Y4N3_TOBAC)	890.779	31.3959	720.953	71.3993	693.752	43.4706	888.906	18.7132	G	yellow	No
Solyc08g006540	Peptidyl-prolyl cis-trans isomerase (B1XHQ5_SYNP2)	1211.16	53.6959	968.616	56.3949	922.506	54.1288	934.234	55.7126	G	turquoise	No
Solyc06g084380	Oxidoreductase 2OG-Fe oxygenase family protein (B6ST02_MAIZE)	187.825	5.71376	208.731	39.9395	326.427	17.8331	251.226	11.5104	G	Not in top 8000 most variable DETs	No
Solyc01g097640	Ribosome biogenesis protein BMS1 homolog (BMS1_HUMAN)	637.798	28.9589	594.461	20.1059	873.893	52.9965	730.512	18.2748	G	turquoise	No
Solyc12g006420	Genomic DNA chromosome 3 P1 clone MMP21 (Q9LHJ0_ARATH)	1085.29	26.2393	1115.17	83.1427	817.214	44.7315	919.133	9.04473	G	blue	No
Solyc08g048250	L-lactate dehydrogenase (C0RY96_PARBP)	545.192	7.21989	577.027	50.0211	697.721	38.0476	674.186	9.50764	G	turquoise	No
Solyc08g008030	AT-hook motif nuclear localized protein 1 (O04696_PEA)	668.702	15.7337	670.354	8.08222	861.599	28.5224	790.869	24.7657	G	turquoise	No
Solyc08g076520	Unknown Protein	521.964	15.3534	561.298	41.1768	685.783	51.2334	559.535	22.537	G	blue	No
Solyc04g054520	Peptidyl-prolyl cis-trans isomerase (D8PA41_9BACT)	1214.46	12.2224	1023.42	56.3639	819.196	82.0598	843.185	24.0702	G	turquoise	No
Solyc10g086660	Rop guanine nucleotide exchange factor 1 (ROGF1_ARATH)	634.981	6.78762	585.629	27.7013	452.262	37.7266	505.866	22.4284	G	yellow	No
Solyc03g095970	3-beta hydroxysteroid dehydrogenase (Q5Q1I5_9LAMI)	30.3127	5.38726	46.849	11.4706	64.8146	6.04652	43.883	4.75122	G	Not in top 8000 most variable DETs	No
Solyc03g114370	RNA helicase DEAD13 (manually curated)	1146.57	42.5057	1057.6	13.7978	1411.98	37.6711	1255.43	40.1759	G	turquoise	No
Solyc09g090580	translation initiation factor iso4E (manually curated)	3286.23	116.711	3643.07	41.931	4241.03	136.91	4195.66	122.507	G	turquoise	No
Solyc03g097160	WD-40 repeat protein (B4AUL0_9CHRO)	377.835	10.061	383.108	15.754	546.719	46.4493	458.366	11.2702	G	turquoise	No
Solyc06g074110	Uncharacterized basic helix-loop-helix protein At1g64625 (Y1462_ARATH)	1010.48	31.6497	858.883	45.9787	757.217	20.7281	772.499	13.5062	G	greenyellow	No
Solyc07g053670	Unknown Protein	409.526	8.33588	386.661	6.51387	572.819	38.0409	454.889	24.9635	G	turquoise	No
Solyc01g098600	Unknown Protein; contains Interpro domain(s) IPR010471 Protein of unknown function DUF1068	294.173	16.542	309.79	8.38447	220.599	3.65399	245.721	5.51694	G	Not in top 8000 most variable DETs	No
Solyc05g018850	Unknown Protein	120.021	4.38637	105.364	4.57972	186.869	15.5571	136.453	8.56491	G	Not in top 8000 most variable DETs	No
Solyc08g066360	Malic enzyme (B9RKI6_RICCO)	678.291	18.9978	536.458	42.1697	449.25	24.1714	554.556	20.2642	G	yellow	No
Solyc06g082970	DnaJ domain family (Q84VQ4_ARATH)	1429.28	66.6012	1150.51	67.0076	967.946	92.7021	1004.07	24.4914	G	yellow	No
Solyc04g074690	39S ribosomal protein L41 mitochondrial (B5XGR0_SALSA)	450.274	9.86404	450.283	14.9121	570.046	15.4139	538.655	34.7197	G	Not in top 8000 most variable DETs	No
Solyc09g090660	Guanine nucleotide-binding protein subunit beta-like protein (GBLP_SCHPO)	3109.37	94.9313	3361.91	31.7296	3944.43	102.952	3968.22	116.747	G	turquoise	No
Solyc04g081490	beta-tubulin (manually curated)	20589.9	1499.17	21643.8	2092.85	30727.3	1124.84	25315.3	1227.74	G	blue	Yes
Solyc08g074750	Zinc finger protein 706 (C3KIH7_ANOFI)	2105.35	47.9076	2215.84	49.5187	2700.16	170.567	2640.05	60.0691	G	turquoise	No
Solyc08g015630	Inositol-tetrakisphosphate 1-kinase 1 (B6TJ44_MAIZE)	253.828	2.14229	262.328	16.5221	414.573	57.7627	309.785	34.7884	G	turquoise	No
Solyc05g046110	Glycosyltransferase-like protein (D8QTD2_SELML)	18.8108	3.05931	27.4717	3.80897	49.1237	14.0781	40.0236	5.11137	G	Not in top 8000 most variable DETs	No
Solyc12g006550	Ribosome biogenesis regulatory protein homolog (B5XEG4_SALSA)	955.725	40.1705	975.366	51.6086	1298.48	34.8277	1119.97	78.0803	G	purple	No
Solyc01g091520	Enoyl-CoA hydratase/isomerase family protein (D7KSC7_ARALY)	592.448	38.2285	528.998	45.0575	427.086	21.371	517.435	16.9217	G	blue	No
Solyc11g005330	PKM-1 actin (manually curated)	16509.2	550.452	18843	962.691	22077.4	995.093	21652.4	609.559	G	turquoise	No
Solyc01g080280	chloroplast glutamine synthetase (manually curated)	11198.9	331.012	8694.1	1096.72	6561.43	436.953	8111.95	383.861	G	yellow	No
Solyc03g114050	54S ribosomal protein L4 mitochondrial (C8UZV4_EMENI)	351.893	21.0738	388.623	9.4405	526.841	18.4901	465.606	15.3325	G	Not in top 8000 most variable DETs	No
Solyc06g008940	Elongation factor Tu (B9SFP0_RICCO)	386.843	11.576	372.11	13.2369	561.415	56.1816	442.357	9.63417	G	turquoise	No
Solyc03g116340	Transcription factor (Fragment) (D6MK24_9ASPA)	555.861	20.9225	539.949	16.4397	436.686	10.5213	463.207	3.78997	G	Not in top 8000 most variable DETs	No
Solyc04g015180	DNA-directed RNA polymerase II polypeptide (B6SLK8_MAIZE)	347.209	14.4124	358.045	18.0003	457.178	11.0786	438.002	22.7557	G	Not in top 8000 most variable DETs	No
Solyc06g064570	SNARE associated Golgi protein (B9XJU7_9BACT)	891.203	25.8484	730.466	43.5863	658.014	18.8464	724.148	33.2791	G	yellow	No
Solyc03g025170	gras10 (manually curated)	1069.13	18.1873	984.246	28.2168	794.851	44.091	926.015	47.5471	G	turquoise	No
Solyc05g024020	Unknown Protein	87.6049	4.95605	83.2525	10.738	45.237	3.94104	58.2952	6.72263	G	Not in top 8000 most variable DETs	No
Solyc03g119880	Early nodulin-55-1 (Fragment) (NO551_SOYBN)	8.97788	3.70274	12.361	2.27352	31.2605	7.90478	10.1939	4.50492	G	Not in top 8000 most variable DETs	No
Solyc03g111510	Zinc finger family protein (D7KQC9_ARALY)	95.9081	9.47644	68.5846	7.42361	44.818	6.42894	65.5888	10.065	G	Not in top 8000 most variable DETs	No
Solyc05g018300	Protein kinase A-like kinase (Q3S1K7_TRYBB)	1600.8	50.2909	1629.72	50.7391	1227.95	37.0364	1418.69	20.9153	G	blue	No
Solyc09g005290	Cc-nbs-lrr, resistance protein	125.607	5.09959	122.601	7.88493	81.0465	6.44729	91.0526	3.20982	G	Not in top 8000 most variable DETs	No
Solyc01g099990	F-box protein PP2-B1 (PP2B1_ARATH)	4.94334	1.29191	12.2137	3.57234	23.9148	6.50047	25.1362	8.53447	G	Not in top 8000 most variable DETs	No
Solyc07g032070	Unknown Protein	186.589	16.3087	176.017	11.9736	133.071	12.2403	145.509	8.67826	G	Not in top 8000 most variable DETs	No
Solyc05g015500	Zinc finger Ran-binding domain-containing protein 2 (ZRAB2_RAT)	2648.52	101.488	2886.79	26.4339	3214.55	161.047	3289.91	166.775	G	turquoise	No
Solyc06g059840	branched chain alpha-keto acid dehydrogenase E1-alpha subunit (manually curated)	76.9985	1.96516	58.4501	4.87815	40.5218	3.65053	49.2022	5.26921	G	Not in top 8000 most variable DETs	No
Solyc04g016240	Nuclear pore complex protein Nup93-like protein (D0MQC8_PHYIN)	1283.82	23.6972	1331.4	31.1361	1624.55	89.2315	1556.66	55.1956	G	turquoise	No
Solyc05g013990	T-complex protein 1 subunit epsilon (B6TSC6_MAIZE)	3224.14	11.8918	3178.39	48.1827	4416.39	294.498	3807.41	86.4917	G	turquoise	No
Solyc03g118240	Magnesium-protoporphyrin ix methyltransferase (D7MGJ7_ARALY)	5303.99	121.241	4410.93	311.814	4008.24	258.383	4411.2	119.877	G	yellow	No
Solyc03g098490	Unknown Protein; contains Interpro domain(s) IPR008480 Protein of unknown function DUF761, plant	394.606	15.9605	335.012	51.0708	265.748	15.0716	267.352	28.7597	G	Not in top 8000 most variable DETs	No
Solyc07g041680	Hypothetical chloroplast RF1 (D7P347_SYZCU)	11.4885	2.71753	26.8673	7.23343	1.88767	0.897149	0.413832	0.413832	G	Not in top 8000 most variable DETs	No
Solyc01g096580	30S ribosomal protein S10 (RS10_CAMFF)	2005.72	110.98	2044.07	31.5548	3513.69	178.762	2968.99	142.121	G	turquoise	No
Solyc06g066060	CGI-144 (manually curated)	3123.56	79.8464	3242.81	44.1594	4057.83	208.348	3679.03	126.845	G	turquoise	No
Solyc02g082020	Unknown Protein	413.425	6.85378	425.26	9.90892	603.205	19.5693	519.638	11.0859	G	Not in top 8000 most variable DETs	No
Solyc04g014600	Universal stress protein family protein (D7L0F0_ARALY)	384.231	28.9337	264.072	18.3924	220.344	24.9762	287.753	18.7825	G	Not in top 8000 most variable DETs	No
Solyc06g048570	Hydrolase alpha/beta fold family protein expressed (Q2QYJ1_ORYSJ)	263.457	9.75306	246.742	13.3508	191.88	10.1497	217.717	6.09021	G	Not in top 8000 most variable DETs	No
Solyc01g080960	AT-hook DNA-binding protein (Fragment) (A1DR79_CATRO)	94.5415	9.5455	91.5288	3.33181	142.814	14.4655	115.52	6.54402	G	Not in top 8000 most variable DETs	No
Solyc07g032740	Aspartate aminotransferase (A9PHH1_POPTR)	1029.06	27.976	1077.89	65.1281	1486.83	114.41	1298.23	46.4864	G	turquoise	No
Solyc03g083870	Pectinesterase (B9ICT1_POPTR)	319.406	16.9848	225.567	23.406	192.918	16.1987	235.373	14.2652	G	Not in top 8000 most variable DETs	No
Solyc02g085050	Inorganic pyrophosphatase-like protein (Q8LA73_ARATH)	720.794	38.5461	812.796	48.903	1114.69	140.996	1032.82	75.3233	G	turquoise	No
Solyc04g078520	Uncharacterized basic helix-loop-helix protein At1g06150 (Y1615_ARATH)	421.662	6.30587	374.953	19.0579	284.079	37.91	350.477	19.7312	G	Not in top 8000 most variable DETs	No
Solyc01g060450	Unknown Protein; contains Interpro domain(s) IPR009606 Protein of unknown function DUF1218	34.2091	2.69579	27.0942	2.47925	16.7059	2.14974	21.763	3.88354	G	Not in top 8000 most variable DETs	No
Solyc01g073740	Citrate synthase (O24135_TOBAC)	2510.19	101.323	2706.37	117.039	3118.14	84.5849	3144.84	60.0374	G	turquoise	No
Solyc03g026210	Dihydrodipicolinate reductase family protein (D7MRM8_ARALY)	349.722	16.4503	279.141	27.3944	246.207	10.4265	278.404	4.79231	G	Not in top 8000 most variable DETs	No
Solyc01g079600	Lipase (C1FIH0_9CHLO)	446.852	16.7969	376.623	14.4366	308.579	9.49173	350.88	22.6753	G	Not in top 8000 most variable DETs	No
Solyc07g061810	Unknown Protein	132.428	7.60841	142.961	9.76724	89.1373	16.5877	103.478	6.84797	G	Not in top 8000 most variable DETs	No
Solyc12g005240	Unknown Protein; contains Interpro domain(s) IPR018962 Domain of unknown function DUF1995	788.515	49.7695	586.839	46.9485	460.581	48.1685	443.685	38.1796	G	turquoise	No
Solyc06g070910	Transcription factor style2.1 (B6CG45_SOLPN)	28.0224	3.62264	45.139	11.6209	83.0725	12.5642	45.6105	5.66705	G	Not in top 8000 most variable DETs	No
Solyc03g117120	Nucleoporin (Fragment) (Q677F1_HYAOR)	880.27	18.3221	849.696	14.7344	1133.15	82.7656	1015.68	17.0846	G	turquoise	No
Solyc03g118910	T-complex protein 1 subunit delta (B9S339_RICCO)	2328.92	45.8959	2355.68	22.5191	2916.98	91.0584	2663.96	53.258	G	blue	No
Solyc01g079330	RNA helicase DEAD3 (manually curated)	1044.27	41.9442	1147.88	36.6389	1320.2	51.8764	1364.63	25.2881	G	turquoise	No
Solyc08g067480	V-type proton ATPase proteolipid subunit (D3PI45_9MAXI)	717.718	41.7191	707.396	15.9207	977.283	62.8245	863.389	76.2562	G	turquoise	No
Solyc10g039390	ATFP3 (Fragment) (Q9ZRE7_ARATH)	11.3795	2.25158	1.32663	0.523114	1.22015	0.585822	0.707079	0.455434	G	Not in top 8000 most variable DETs	No
Solyc01g097910	Rubredoxin family protein (D7KP11_ARALY)	1503.06	95.4211	1344.72	55.3701	1166.49	72.7295	1369.48	17.4283	G	yellow	No
Solyc02g077730	Unknown Protein	321.119	33.4827	303.827	12.5769	432.624	20.8987	329.906	18.7304	G	Not in top 8000 most variable DETs	No
Solyc10g007120	Genomic DNA chromosome 3 BAC clone F4B12 (Q9LIM4_ARATH)	1931	49.9328	1675.02	128.508	1558.97	81.586	1697.15	88.3802	G	yellow	No
Solyc07g009160	Neighbor of COX4 (D3PHS4_9MAXI)	711.587	50.7429	744.014	31.9595	1011.36	42.7921	862.144	25.2138	G	turquoise	No
Solyc10g009570	Rhodanese-related sulfurtransferase (A4U0Q7_9PROT)	1735.48	59.3516	1305.89	96.6176	872.342	109.07	1065.81	23.5531	G	yellow	No
Solyc01g081250	Glutathione-S-transferase (A3FMP5_SOLLC)	399.835	79.3727	416.982	79.065	147.944	43.5251	248.226	79.9297	G	purple	No
Solyc11g007180	GDSL esterase/lipase At5g03610 (GDL71_ARATH)	29.7633	5.83708	7.8225	3.03694	4.06455	1.19383	4.24968	0.473173	G	Not in top 8000 most variable DETs	No
Solyc05g055280	Ferredoxin-6 (B6T626_MAIZE)	1096.67	56.6835	1202.62	62.9315	1607.37	92.2915	1364.31	76.5049	G	turquoise	No
Solyc01g008370	26S proteasome regulatory subunit (A8J8V5_CHLRE)	3567.53	129.489	3832.79	39.801	4405.35	76.9153	4286.06	62.1143	G	greenyellow	No
Solyc01g087750	Homology to unknown gene (Fragment) (Q015C3_OSTTA)	695.233	43.4765	527.175	54.2711	367.268	69.2589	405.901	17.5866	G	yellow	No
Solyc11g068430	Ferredoxin (Q9AUE1_IMPBA)	1064.87	51.652	1232.81	37.6501	1432.22	45.0807	1279.39	12.3588	G	turquoise	No
Solyc12g099280	Pre-mRNA polyadenylation factor fip1 (B6JX34_SCHJY)	234.011	7.90373	237.297	7.25537	309.463	7.5983	264.356	13.3135	G	Not in top 8000 most variable DETs	No
Solyc04g015450	extensin X55684 (manually curated)	2905.17	87.3553	2498.85	77.2629	2255.37	120.978	2721.67	63.0277	G	yellow	No
Solyc02g092390	Unknown Protein	197.926	3.85036	210.617	6.21258	271.852	13.4663	250.937	18.3278	G	Not in top 8000 most variable DETs	No
Solyc02g087300	Protein transport SEC13-like protein (Q2PYY1_SOLTU)	2886.47	120.989	3144.36	89.9006	3706.32	117.983	3552.64	90.0926	G	turquoise	No
Solyc02g084020	Small nuclear ribonucleoprotein Sm D3 (B6UDW2_MAIZE)	434.219	6.87481	406.793	19.4127	555.528	21.4917	498.444	24.494	G	Not in top 8000 most variable DETs	No
Solyc01g086960	Zinc finger A20 and AN1 domain-containing stress-associated protein 6 (C1BNQ4_9MAXI)	2917.36	86.7318	2813.76	143.187	2337.34	86.8895	2904.22	85.5412	G	blue	No
Solyc01g110530	Peptidyl-prolyl cis-trans isomerase C (PPIC_ECOLI)	1756.59	52.0738	1852.7	95.3638	2276.31	128.311	2101.05	39.6298	G	turquoise	No
Solyc09g012000	Receptor like protein kinase (Q39139_ARATH)	103.689	9.63581	124.203	10.9052	66.1103	2.12635	96.0439	8.39781	G	Not in top 8000 most variable DETs	No
Solyc03g051900	30S ribosomal protein S1 (RS1_CHLPN)	1071.97	17.7979	1101.79	50.1825	1321.07	78.4493	1266.55	35.0017	G	turquoise	No
Solyc12g015690	Fasciclin-like arabinogalactan protein 10 (A9XTL5_GOSHI)	3363.66	146.634	3276.97	387.537	4441.22	196.592	3507.13	43.2217	G	blue	No
Solyc04g071340	Fructose-1 6-bisphosphatase class 1 (D3PE46_DEFDS)	220.395	15.585	272.463	6.45132	308.99	12.9612	338.738	8.04548	G	Not in top 8000 most variable DETs	No
Solyc07g066410	WD repeat protein (B6QUX1_PENMQ)	429.498	8.00112	440.474	5.26057	643.943	27.8429	523.731	24.3226	G	purple	No
Solyc04g076800	Pentatricopeptide repeat-containing protein (D7MHD4_ARALY)	576.942	18.4527	499.424	41.8485	437.179	18.2697	451.024	32.3474	G	Not in top 8000 most variable DETs	No
Solyc09g065560	Sulfate transporter (D7LTZ8_ARALY)	41.2294	3.85239	38.4284	2.89308	23.03	1.5922	31.1012	3.61629	G	Not in top 8000 most variable DETs	No
Solyc04g080520	Unknown Protein	461.058	52.666	411.593	20.3806	329.656	5.99198	357.878	37.8721	G	Not in top 8000 most variable DETs	No
Solyc01g091780	Fructosamine kinase family protein (D7LS54_ARALY)	784.229	23.6941	623.454	57.7258	618.711	34.525	682.152	14.7475	G	yellow	No
Solyc10g076760	Receptor-like protein kinase (C6FF64_SOYBN)	21.6655	2.42018	16.0555	5.30509	4.94686	1.24483	11.0733	1.91105	G	Not in top 8000 most variable DETs	No
Solyc05g007170	Cc-nbs-lrr, resistance protein with an R1 specific domain	230.988	16.1643	238.93	10.6167	175.157	12.4299	232.558	20.3904	G	Not in top 8000 most variable DETs	No
Solyc11g045230	Tripartite motif-containing 22 (Predicted) (B0VXD4_CALJA)	24.5662	0.638245	22.5805	4.30926	91.105	18.3721	40.8887	5.62692	G	Not in top 8000 most variable DETs	No
Solyc12g006640	Lactoylglutathione lyase (B4UW95_ARAHY)	14.7044	2.18749	20.6826	4.03993	55.2814	15.4117	37.8011	9.47726	G	Not in top 8000 most variable DETs	No
Solyc08g007610	Subtilisin-like protease (Q9LWA3_SOLLC)	35.864	8.82187	66.3218	26.1631	98.7288	9.62407	89.4132	11.5058	G	Not in top 8000 most variable DETs	No
Solyc01g109030	B3 domain-containing protein REM5 (REM5_ARATH)	2017.95	67.5018	1668.1	145.376	1437.5	148.874	1639.6	22.9863	G	yellow	No
Solyc01g087140	Harpin-induced protein (B6TDG9_MAIZE)	148.522	10.9941	118.059	8.6925	79.9026	4.36159	101.403	8.55983	G	Not in top 8000 most variable DETs	No
Solyc09g075210	Late embryogenesis abundant protein 5 (Q1HGG0_9ROSI)	3576.92	226.607	4717.24	397.51	5880.21	482.864	5558.08	184.386	G	turquoise	No
Solyc11g007510	Unknown Protein	468.659	19.8087	479.988	10.0792	337.376	10.9758	387.516	18.6446	G	Not in top 8000 most variable DETs	No
Solyc12g007030	Aldehyde dehydrogenase 1 (C5I9X1_ARTAN)	1924.84	75.2828	2322.15	73.3837	2384.54	139.248	2133.37	156.895	G	grey	No
Solyc01g065580	Pumilio domain-containing protein KIAA0020 (B5X3V8_SALSA)	794.725	2.43471	774.508	8.12066	1031.37	49.6356	905.715	25.7432	G	turquoise	No
Solyc10g018750	Matrix metalloproteinase (D7LBU9_ARALY)	16.559	4.43854	33.3131	4.61484	120.462	47.7207	65.8382	25.2267	G	Not in top 8000 most variable DETs	No
Solyc05g005480	Oxidoreductase zinc-binding dehydrogenase (C2RQQ3_BACCE)	2115.97	59.3201	1878.74	79.5185	1589.73	166.252	1915.39	45.9928	G	yellow	No
Solyc06g073460	phospholipid hydroperoxide glutathione peroxidase (manually curated)	4306.51	79.6249	5205.2	387.939	5968.05	174.63	6161.69	210.186	G	turquoise	No
Solyc05g046320	Small auxin up-regulated RNA55 (manually curated)	110.358	12.1738	108.666	7.01184	191.123	13.9357	138.243	2.87102	G	Not in top 8000 most variable DETs	No
Solyc03g025310	Sec-independent protein translocase protein tatA/E homolog (D4TUR0_9NOST)	1578.98	37.9788	1295.81	66.367	1298.63	36.5535	1318.3	72.6985	G	yellow	No
Solyc04g080660	Carboxyl methyltransferase 4 (B0ZB58_HUMLU)	8.09561	1.27515	10.5094	1.31219	23.2334	1.71633	21.5023	1.59132	G	Not in top 8000 most variable DETs	No
Solyc08g075680	Unknown Protein	313.834	12.023	246.018	13.5823	225.907	7.63671	258.238	13.2174	G	Not in top 8000 most variable DETs	No
Solyc09g009490	Bzip transcription factor (Q00M78_SOYBN)	108.303	5.29487	126.297	14.0476	197.097	26.0619	186.065	19.2188	G	Not in top 8000 most variable DETs	No
Solyc05g005170	Polygalacturonase 2 (A8D0T9_ONCHC)	220.19	10.7412	166.842	25.454	88.6683	7.69785	131.205	8.39536	G	Not in top 8000 most variable DETs	No
Solyc03g112680	LRR receptor-like serine/threonine-protein kinase, RLP	306.064	12.2542	251.361	24.3169	218.728	8.13124	212.381	9.8794	G	Not in top 8000 most variable DETs	No
Solyc08g062800	RNA helicase DEAD26 (manually curated)	4977.17	186.161	5039.91	38.7266	6357.99	279.21	5996.29	177.324	G	turquoise	No
Solyc08g075430	ABC transporter G family member 14 (AB14G_ARATH)	1442.23	28.619	1242.11	65.957	1007.6	67.8701	1076.24	82.0693	G	turquoise	No
Solyc01g107580	Pseudouridine synthase family protein (D7L9Z2_ARALY)	98.2317	5.84958	113.363	4.66891	142.35	5.32019	105.069	3.03939	G	Not in top 8000 most variable DETs	No
Solyc07g052180	Unknown Protein	41.4038	6.42667	19.8091	3.82002	10.6282	3.0233	11.1203	0.372592	G	Not in top 8000 most variable DETs	No
Solyc12g056540	Histone H3 (Q5S265_CAMSI)	300.788	19.2379	297.552	7.82098	490.407	53.999	404.618	64.2009	G	turquoise	No
Solyc08g014560	Polygalacturonase (Q68UW1_PYRCO)	33.8321	10.6606	29.2211	6.01535	71.9481	8.84638	47.3626	8.7568	G	Not in top 8000 most variable DETs	No
Solyc01g005520	Tetratricopeptide TPR_2 repeat protein (A8ZVN6_DESOH)	1280.64	54.1369	1026.92	42.4302	843.955	69.3411	944.58	4.97378	G	yellow	No
Solyc01g104030	Inward rectifier potassium channel-like protein (Fragment) (Q1W7D1_SOLLC)	322.167	11.8427	250.944	40.2452	185.406	10.6269	222.723	1.95244	G	Not in top 8000 most variable DETs	No
Solyc02g093330	Nup98 (Fragment) (A1YK38_DROME)	447.845	32.823	398.911	16.8146	304.815	6.46857	370.779	16.4709	G	Not in top 8000 most variable DETs	No
Solyc09g008590	Unknown Protein	240.314	29.2856	269.989	50.5467	438.358	30.9786	327.214	22.7863	G	blue	No
Solyc01g096140	Aluminum-activated malate transporter (Fragment) (C6EP55_SECCE)	220.831	15.9389	177.145	14.962	152.181	17.6813	137.144	14.4486	G	Not in top 8000 most variable DETs	No
Solyc02g062700	26S protease regulatory subunit 6A (PRS6A_YEAST)	497.391	24.8898	456.343	11.9448	631.397	28.0493	516.892	8.03613	G	Not in top 8000 most variable DETs	No
Solyc10g011870	Reticulon family protein (B2WS91_9BRAS)	1197.73	33.2835	1318.21	72.8456	1506.81	49.115	1390.85	62.6342	G	blue	No
Solyc05g024430	Unknown Protein	254.69	9.82897	185.665	11.2025	160.529	27.1522	192.324	11.8123	G	Not in top 8000 most variable DETs	No
Solyc03g082940	Importin subunit beta (B0WBR4_CULQU)	3113.45	194.718	3636.52	214.235	3859.44	195.765	3861.12	72.093	G	turquoise	No
Solyc02g086700	Beta-1 3-glucanase (Q9SYX6_TOBAC)	15.5382	1.37926	3.72386	1.61874	3.84501	0.592999	3.1568	1.71557	G	Not in top 8000 most variable DETs	No
Solyc04g078470	D-type cyclin-3 (manually curated)	600.614	15.4743	451.568	52.6108	397.279	40.3134	411.106	51.7991	G	turquoise	No
Solyc10g054880	Translocon-associated protein alpha subunit (B6SRQ1_MAIZE)	1195.59	36.8606	1268.2	37.6456	1770.78	102.986	1454.53	130.487	G	turquoise	No
Solyc10g078470	Tyrosine-specific transport protein (D7DFI8_CHLTL)	37.3938	1.61328	51.1579	3.16013	63.5696	6.01756	54.8817	6.32228	G	Not in top 8000 most variable DETs	No
Solyc06g075170	Arabidopsis thaliana genomic DNA chromosome 5 P1 clone MOK16 (Q9LYW2_ARATH)	23.5748	6.79275	20.9436	1.33879	0.667816	0.440802	1.12295	0.240185	G	Not in top 8000 most variable DETs	No
Solyc06g008760	Glutaredoxin (B3F8F2_SOLTU)	213.453	10.5932	176.77	17.412	97.1623	5.05997	128.945	9.08447	G	Not in top 8000 most variable DETs	No
Solyc05g014540	DNA polymerase alpha subunit B family (D7KVM0_ARALY)	248.313	11.0344	249.677	6.59043	340.702	36.403	312.882	20.7898	G	Not in top 8000 most variable DETs	No
Solyc03g093470	LEAPSAA2 L.esculentum APS-AA2 (manually curated)	434.668	19.2575	407.544	21.4327	336.052	6.2758	350.475	10.948	G	Not in top 8000 most variable DETs	No
Solyc03g116740	Genomic DNA chromosome 3 P1 clone MSJ11 (Q9LVZ7_ARATH)	616.817	10.1596	651.294	64.821	779.356	32.1228	686.171	31.7953	G	blue	No
Solyc02g077330	GDSL esterase/lipase At5g45950 (GDL85_ARATH)	186.501	8.51958	153.213	9.22681	129.39	14.2879	153.119	21.1982	G	Not in top 8000 most variable DETs	No
Solyc03g115650	eukaryotic translation initiation factor 5A-1 (manually curated)	3111.9	264.483	3525.93	215.55	4244.26	219.401	3959.52	154.001	G	turquoise	No
Solyc07g052420	Chromosome 15 contig 1 DNA sequence (Q00UQ3_OSTTA)	350.817	8.35811	332.404	22.2553	448.036	15.5677	401.397	3.02036	G	Not in top 8000 most variable DETs	No
Solyc01g097290	Auxin responsive protein (D9IQE6_CATRO)	6368.06	153.225	5482.05	121.549	4937.88	164.757	4848.15	109.375	G	greenyellow	No
Solyc10g009210	Calmodulin-binding protein (Fragment) (Q9M451_CICAR)	316.897	8.15229	302.868	30.5733	223.479	12.9704	293.969	14.7272	G	Not in top 8000 most variable DETs	No
Solyc06g073240	Acetyl xylan esterase A (D7JXX9_9BACE)	638.613	20.2796	578.09	23.2396	488.852	18.2114	496.242	15.8089	G	Not in top 8000 most variable DETs	No
Solyc10g009380	Unknown Protein	25.5104	4.01806	14.3223	2.40883	11.0253	2.09337	9.48441	2.62587	G	Not in top 8000 most variable DETs	No
Solyc06g009520	Pentatricopeptide repeat-containing protein (D7LDK6_ARALY)	3035.28	61.9123	2803.58	101.788	2470.86	58.7541	2898.45	78.4975	G	blue	No
Solyc07g043420	2-oxoglutarate-dependent dioxygenase 2 (manually curated)	6779.51	189.183	7660.96	860.108	9921.98	242.894	8307.83	236.192	G	turquoise	No
Solyc02g063260	Multidrug resistance protein mdtK (MDTK_ERWCT)	1466.28	27.9944	1516.96	23.3841	1079.26	10.7192	1250.73	40.1586	G	blue	No
Solyc08g074450	(RAP Annotation release2) Galactose-binding like domain containing protein (Q10RT4_ORYSJ)	962.99	44.2599	755.889	78.8908	711.102	26.9266	815.305	42.365	G	yellow	No
Solyc04g080040	UBA/TS-N domain protein (B6QFU5_PENMQ)	64.0218	2.58661	57.0172	5.39271	28.2378	3.11151	42.3339	4.12031	G	Not in top 8000 most variable DETs	No
Solyc08g082290	Inner membrane protein oxa1-1 mitochondrial (B0WXK3_CULQU)	268.785	8.9333	275.443	13.9167	347.483	19.5692	282.379	8.00775	G	Not in top 8000 most variable DETs	No
Solyc02g032530	Ulp1 protease family C-terminal catalytic domain containing protein (Q60D46_SOLDE)	22.8233	2.59681	29.2797	4.81754	57.4913	9.10663	41.9406	2.80533	G	Not in top 8000 most variable DETs	No
Solyc08g081430	TIM21-like protein mitochondrial (C3KHJ2_ANOFI)	338.251	8.91542	345.92	17.4484	467.652	29.2109	415.765	17.254	G	Not in top 8000 most variable DETs	No
Solyc12g094720	PsbP domain-containing protein 3, chloroplastic (PPD3_ARATH)	563.065	7.65476	438.583	37.8937	317.693	52.0481	336.772	4.16881	G	yellow	No
Solyc09g082350	Vicilin-like protein (Fragment) (Q9SEW4_9ROSI)	0	0	0	0	55.6533	26.8203	14.0514	9.07633	G	Not in top 8000 most variable DETs	No
Solyc11g072000	Disease resistance protein R3a-like protein (Fragment) (B3F576_SOLDE)	801.224	22.2226	785.695	22.2194	620.813	12.8576	731.989	40.5182	G	turquoise	No
Solyc03g119570	Glucose-repressible alcohol dehydrogenase transcriptional effector (D6RLR7_COPC7)	200.396	9.08263	218.576	24.2009	270.986	4.74444	244.75	10.9974	G	Not in top 8000 most variable DETs	No
Solyc09g005330	Symplekin (Q17I55_AEDAE)	1534.28	20.8764	1767.85	13.1181	2022.55	129.559	2092.67	50.3782	G	turquoise	No
Solyc03g007470	Ubiquitin-conjugating enzyme E2 10 (UBC10_ARATH)	3815.42	304.627	4735.87	385.015	5681.1	361.358	5439.63	227.917	G	turquoise	No
Solyc11g072550	Extradiol ring-cleavage dioxygenase class III protein subunit B (B8GF38_METPE)	1195.13	21.9607	1366.15	83.7873	843.764	45.8265	1132.52	21.0516	G	blue	No
Solyc12g010910	Lipase (Fragment) (Q9ZTW1_DIACA)	702.079	27.387	581.39	49.4752	411.373	42.7605	483.719	12.1006	G	yellow	No
Solyc04g079380	30S ribosomal protein S14 (A3VT32_9PROT)	346.143	8.35075	337.887	5.31273	472.881	33.4079	348.584	34.7976	G	Not in top 8000 most variable DETs	No
Solyc06g072890	WUSCHEL-related homeobox 11 (B6SN57_MAIZE)	222.158	11.9341	224.997	8.89121	310.475	11.8102	272.837	9.82493	G	Not in top 8000 most variable DETs	No
Solyc03g117720	AP2-like ethylene-responsive transcription factor At1g16060 (AP2L1_ARATH)	81.9793	10.7771	52.8566	4.19284	42.6262	1.1808	43.1665	4.91123	G	Not in top 8000 most variable DETs	No
Solyc01g109410	Dolichyl-diphosphooligosaccharide--protein glycosyltransferase subunit (C1C2G2_9MAXI)	3567.68	128.084	3715.51	71.7454	4623.65	201.689	4394.39	153.056	G	yellow	No
Solyc01g095670	Rhodanese-related sulfurtransferase (A0NUG1_9RHOB)	1871.07	40.1226	1745.41	52.207	1380.08	107.231	1656.67	54.4765	G	yellow	No
Solyc03g114360	Poly polymerase catalytic domain containing protein expressed (Q84T80_ORYSJ)	407.153	47.4903	418.9	30.4335	282.963	21.7846	337.065	12.2338	G	Not in top 8000 most variable DETs	No
Solyc06g054300	Gibberellin receptor GID1L2 (B6T2M3_MAIZE)	8.94171	0.676579	20.1101	7.7248	32.9466	4.82959	21.8605	1.49535	G	Not in top 8000 most variable DETs	No
Solyc08g079230	Cortical cell-delineating protein (B6T836_MAIZE)	40.0703	4.31962	57.18	10.4561	88.6262	8.36856	50.8621	4.33287	G	Not in top 8000 most variable DETs	No
Solyc05g013280	Pseudomonas resistance (manually curated)	1142.12	18.2315	1157.5	61.4847	849.091	55.9763	996.85	36.1919	G	blue	No
Solyc08g041980	C15orf24 homolog (C1BJZ2_OSMMO)	1141.47	40.7046	1214.53	30.8643	1438.13	42.447	1344.38	26.2005	G	turquoise	No
Solyc03g093130	xyloglucan endotransglucosylase-hydrolase 3 (manually curated)	189.172	35.3496	126.45	22.8548	64.3712	3.67293	91.5821	13.2472	G	Not in top 8000 most variable DETs	No
Solyc12g010790	Ras-related protein Rab-25 (RAB25_BOVIN)	823.704	22.1851	938.536	31.6538	1164	42.9215	1125.52	30.3879	G	turquoise	No
Solyc01g058390	Galactokinase (B6V3B9_CUCME)	550.326	30.0124	610.264	27.944	762.967	32.6507	644.926	21.8952	G	turquoise	No
Solyc04g055000	Tetratricopeptide repeat protein 4 homolog (TTC4_DICDI)	48.2224	3.51289	60.647	1.77709	76.903	2.76123	59.4	2.8375	G	Not in top 8000 most variable DETs	No
Solyc06g019200	Peptidase M50 family protein (D7LZ04_ARALY)	2058.97	73.5763	1830.13	108.976	1607.01	124.092	1878.31	33.0589	G	yellow	No
Solyc11g016990	Receptor-type tyrosine-protein phosphatase S (B6TAK5_MAIZE)	339.452	14.3807	386.204	7.04114	486.594	18.6708	453.702	10.3944	G	Not in top 8000 most variable DETs	No
Solyc07g007980	ATP binding / serine-threonine kinase (C5DB71_VITVI)	307.478	9.35464	251.293	27.4914	224.247	9.36953	230.111	13.0539	G	Not in top 8000 most variable DETs	No
Solyc07g056670	gibberellin 2-oxidase 2 (manually curated)	253.507	11.0072	207.947	33.4906	177.448	9.25641	211.48	10.9547	G	Not in top 8000 most variable DETs	No
Solyc03g007960	beta-carotene hydroxylase-2 (manually curated)	234.379	14.8835	250.717	44.1178	128.65	11.4511	191.221	11.112	G	Not in top 8000 most variable DETs	No
Solyc05g007710	MYB transcription factor (Q6R098_ARATH)	22.4281	2.95179	14.7314	2.45247	7.44623	0.674113	6.83639	1.8601	G	Not in top 8000 most variable DETs	No
Solyc11g005430	Nodulin-like protein (B6TIX8_MAIZE)	18.8639	2.71895	16.6729	2.246	6.32937	2.0358	5.39056	1.10154	G	Not in top 8000 most variable DETs	No
Solyc02g093900	Cytochrome c1 (Q9FKS5_ARATH)	5437.34	95.6153	5827.65	167.3	7181.49	269.411	6947.6	199.551	G	turquoise	No
Solyc00g007010	Phosphatidylinositol phosphate (PtdInsP) phosphatase involved in hydrolysis of PtdIns (D6VWZ1_YEAST)	585.577	9.04714	641.068	43.6404	770.835	28.914	737.966	27.5233	G	turquoise	No
Solyc01g099850	Multi-pass transmembrane protein (Q5CLX7_CRYHO)	345.315	14.0891	367.563	9.49409	470.607	13.8889	416.822	5.34033	G	Not in top 8000 most variable DETs	No
Solyc11g007990	chloroplast malate dehydrogenase (mdh) (manually curated)	3189.74	90.0458	2753.28	147.008	2428.02	151.648	2849.82	66.1405	G	yellow	No
Solyc01g066740	Transducin family protein (Fragment) (D7L607_ARALY)	2174.44	28.3302	1868.55	64.5005	1507.91	57.3243	1715.01	37.3184	G	yellow	No
Solyc05g007580	Zinc finger-homeodomain protein 1 (Fragment) (B0LK19_CUCSA)	425.909	38.8595	369.463	10.5005	288.218	13.9033	360.208	5.5788	G	Not in top 8000 most variable DETs	No
Solyc03g062830	Nudix hydrolase 23 (B6TED1_MAIZE)	1257.95	28.3342	1118.29	70.7096	959.386	49.3736	999.281	52.743	G	turquoise	No
Solyc05g009820	Glycosyltransferase family GT8 protein (D0ECQ6_POPDE)	2153.08	148.072	1722.39	116.698	1731.93	55.022	1808.95	67.2525	G	grey	No
Solyc09g009940	Signal recognition particle protein (B0CBK0_ACAM1)	7302.38	287.835	6341.02	204.539	5566.05	279.138	6538.12	209.826	G	yellow	No
Solyc08g007060	Peptide transporter-like protein (Q9SVS9_ARATH)	899.999	25.2488	826.006	113.901	628.43	50.205	651.965	52.3318	G	turquoise	No
Solyc10g078670	BZIP transcription factor (Q93XM5_ARATH)	69.9902	6.13749	77.5205	6.67902	120.623	22.8102	80.2996	1.98764	G	Not in top 8000 most variable DETs	No
Solyc11g072080	Kelch-like 13 (Q66IL9_XENTR)	251.439	22.1337	229.563	11.5059	181.873	10.3002	180.713	8.45077	G	Not in top 8000 most variable DETs	No
Solyc03g034100	Plant-specific domain TIGR01568 family protein (B6U561_MAIZE)	23.8999	3.40249	22.0239	2.95375	9.81036	0.753094	11.7018	1.72518	G	Not in top 8000 most variable DETs	No
Solyc11g067290	Acyltransferase-like protein (Q589X7_TOBAC)	47.6203	2.98134	71.065	19.7571	93.5691	4.0293	75.3905	8.92945	G	Not in top 8000 most variable DETs	No
Solyc10g005610	Unknown Protein	103.823	10.6501	86.8264	2.49388	155.168	3.00519	121.302	9.9119	G	Not in top 8000 most variable DETs	No
Solyc03g081240	Pseudo response regulator (B9IDF0_POPTR)	620.181	21.7206	688.337	39.1537	363.373	27.6895	573.106	30.2141	G	blue	No
Solyc07g055290	LES245570 Rab11 GTPase (manually curated)	954.554	36.7287	1024.61	95.8272	1287.34	14.4432	1150.41	33.3433	G	blue	No
Solyc04g071870	ATP binding/protein serine/threonine kinase (C6FF68_SOYBN)	351.709	9.90382	372.941	33.111	260.378	9.4733	315.599	17.6803	G	Not in top 8000 most variable DETs	No
Solyc03g117790	Serine/threonine protein kinase (Q16PN5_AEDAE)	80.7251	2.1198	94.2425	7.98667	134.929	5.61785	106.892	3.20274	G	Not in top 8000 most variable DETs	No
Solyc02g021000	YGGT family conserved hypothetical integral membrane protein (A4CQQ7_SYNPV)	1310.12	38.0073	1156.83	63.2318	878.926	74.3819	956.961	10.8191	G	yellow	No
Solyc09g075030	Nucleolar protein (NOP16) involved in 60S ribosomal subunit biogenesis (ISS) (Q01AF2_OSTTA)	761.844	25.7266	786.106	18.2581	979.01	11.1587	844.446	36.1489	G	purple	No
Solyc03g111700	Inactivated Zn-dependent hydrolase of the beta-lactamase fold (B5ILK8_9CHRO)	904.74	20.069	957.385	20.7917	653.386	81.7955	800.427	45.7144	G	turquoise	No
Solyc10g081570	Marmande (manually curated)	16.4916	2.9281	15.1174	2.05139	1.87355	0.671811	2.73897	1.17045	G	Not in top 8000 most variable DETs	No
Solyc09g090520	Heterogeneous nuclear ribonucleoprotein A3 (B6TGB9_MAIZE)	3481.2	113.92	3814.43	54.3782	4687.01	164.209	4342.12	94.8494	G	purple	No
Solyc12g015680	Ycf60 protein (Q8DJZ7_THEEB)	972.723	44.5763	781.219	51.0007	760.106	28.1169	721.154	43.0506	G	turquoise	No
Solyc06g005110	Ribosomal protein S23 (A8IJQ4_CHLRE)	241.456	22.8101	246.123	18.4582	333.708	22.885	279.577	8.14618	G	Not in top 8000 most variable DETs	No
Solyc11g007790	Nbs-lrr, resistance protein	14.3007	3.7026	21.2283	7.07786	37.3636	3.89796	27.1841	2.41887	G	Not in top 8000 most variable DETs	No
Solyc04g057980	Orange Ripening (manually curated)	769.79	25.3209	669.457	28.9988	558.424	78.3917	617.282	31.6023	G	yellow	No
Solyc02g090370	Reticulon-like protein B13 (RTNLM_ARATH)	3.63532	0.557236	2.40224	0.64366	182.07	83.6048	61.249	32.2088	G	purple	No
Solyc04g051540	WRKY transcription factor 13 (manually curated)	49.7348	7.10596	43.3369	4.39399	20.9857	0.972181	27.0906	1.89855	G	Not in top 8000 most variable DETs	No
Solyc01g106480	glyoxisomal malate dehydrogenase (manually curated)	2552.67	121.47	2318.94	179.443	1970.73	161.492	2417.16	46.4791	G	yellow	No
Solyc06g048640	Unknown Protein	512.962	26.5709	426.669	30.075	370.356	39.5352	355.971	13.9988	G	Not in top 8000 most variable DETs	No
Solyc02g085380	Integral membrane protein (A8JE84_CHLRE)	20.7624	3.00072	21.7255	4.38252	39.4709	4.39383	25.7658	1.59161	G	Not in top 8000 most variable DETs	No
Solyc02g083580	Ras-like GTP-binding protein RHO (RHO_APLCA)	872.351	47.8826	927.389	41.3256	1132.55	26.0199	1094.42	35.5955	G	turquoise	No
Solyc03g113450	Receptor like kinase, RLK	436.373	31.8618	392.805	19.4345	562.869	29.9577	479.384	38.0457	G	turquoise	No
Solyc02g084840	Dehydrin DHN1 (DHN1_PEA)	1014.62	101.165	1394.66	184.5	2358.17	563.447	2183.99	320.485	G	turquoise	No
Solyc07g065900	Fructose-bisphosphate aldolase (A9PEE1_POPTR)	213.401	20.1	162.252	31.1816	72.0036	13.0347	120.279	16.761	G	Not in top 8000 most variable DETs	No
Solyc08g077300	Adenylate kinase (B6TE58_MAIZE)	125.444	3.91658	102.07	18.2852	66.0638	11.2897	79.5788	8.21829	G	Not in top 8000 most variable DETs	No
Solyc06g084050	Photosystem II reaction center W protein (B6TMB3_MAIZE)	1690.15	56.9893	1497.1	87.5049	1109.77	171.573	1186.49	54.2326	G	yellow	No
Solyc03g116870	Glycosyl transferase family 9 (A0YHY3_LYNSP)	2604.79	92.9178	2164.2	120.517	1664.71	179.092	1861.71	55.8343	G	yellow	No
Solyc03g098260	MYB transcription factor (B9I4W4_POPTR)	16.7417	3.49618	5.94308	1.23377	3.30645	1.22389	3.84045	0.958574	G	Not in top 8000 most variable DETs	No
Solyc06g083520	Nucleolar GTP-binding protein 2 (B0WF29_CULQU)	374.302	4.70793	390.337	8.94873	532.321	13.349	479.108	22.2439	G	Not in top 8000 most variable DETs	No
Solyc03g116320	TCP transcription factor 16 (manually curated)	445.55	11.7317	463.205	39.4007	304.165	19.1242	375.083	19.7414	G	Not in top 8000 most variable DETs	No
Solyc08g079670	SNARE associated Golgi protein (C7QSR3_CYAP0)	1524.84	50.0046	1618.32	50.2275	1210.38	13.3146	1378.46	33.0739	G	turquoise	No
Solyc05g056100	Double-stranded RNA binding protein (A9T6E4_PHYPA)	828.297	31.831	974.427	9.51512	1020.59	24.296	1168	24.6967	G	turquoise	No
Solyc07g056040	UPF0497 membrane protein 11 (U497B_VITVI)	754.322	53.8565	833.451	13.0504	1113.49	79.5114	981.327	86.7815	G	turquoise	No
Solyc06g082710	Nucleic acid binding protein (B4FN92_MAIZE)	497.276	20.0932	539.085	23.1174	623.212	11.6996	496.189	9.48165	G	Not in top 8000 most variable DETs	No
Solyc04g074510	tft3 14-3-3 (manually curated)	5083.25	153.985	5523.22	247.163	6792.99	381.271	6441.5	219.908	G	turquoise	No
Solyc04g078740	Subtilisin-like protease (Q38708_ALNGL)	2562.74	130.675	2217.74	80.518	2030.93	124.038	2113.9	156.495	G	turquoise	No
Solyc08g006720	Glutathione peroxidase (D6BR59_9ROSI)	1337.41	32.7773	1475.94	21.8221	1057.26	94.0443	1287.84	57.3496	G	turquoise	No
Solyc06g075250	C2H2L domain class transcription factor (D9ZIU4_MALDO)	2386.7	87.2803	2190.86	66.109	1805.9	102.66	1962.21	41.8097	G	yellow	No
Solyc04g082960	TMV response-related protein (B6UGH4_MAIZE)	372.321	60.704	352.294	61.7838	162.013	14.7495	255.992	15.8355	G	blue	No
Solyc10g006230	Chlorophyll a-b binding protein 7, chloroplastic (CB12_SOLLC)	10180.7	372.332	8270.21	217.99	5843.68	909.394	6619.78	310.955	G	yellow	No
Solyc03g115760	Vesicle transport v-SNARE 11-like (Q307Y3_SOLTU)	1641.99	54.7888	1877.34	62.6361	2042.02	32.8565	1931.68	22.4987	G	greenyellow	No
Solyc06g036130	Multidrug resistance protein mdtK (MDTK_YERP3)	376.105	21.7644	307.123	38.5386	227.588	13.3292	278.975	7.64297	G	Not in top 8000 most variable DETs	No
Solyc03g044260	Ubiquitin-conjugating enzyme E2 I (B6U359_MAIZE)	564.18	32.3744	594.575	53.6129	952.642	81.9377	729.307	46.4036	G	turquoise	No
Solyc01g099920	Photoassimilate-responsive protein PAR-1b-like protein (Q9LCZ9_ARATH)	15.9239	1.62599	14.0509	2.34823	41.6509	4.98057	25.6846	5.39177	G	Not in top 8000 most variable DETs	No
Solyc02g093510	cDNA clone J023001A15 full insert sequence (B7EFQ5_ORYSJ)	367.244	14.196	357.395	12.0813	475.246	24.7616	415.656	9.68666	G	Not in top 8000 most variable DETs	No
Solyc04g012120	SIG5 14-3-3 family protein (manually curated)	6374.94	277.647	6885.21	171.879	8108.64	413.051	7856.96	348.962	G	turquoise	No
Solyc01g089910	Flotillin domain protein (B8M1F1_TALSN)	36.403	3.44048	37.9189	7.25308	15.9225	4.0922	22.6489	2.9687	G	Not in top 8000 most variable DETs	No
Solyc01g103530	Receptor like kinase, RLK	1194.74	41.321	1116.49	33.5382	947.494	33.0609	1000.88	26.1561	G	turquoise	No
Solyc03g034400	Multidrug resistance protein mdtK (MDTK_EDWI9)	51.9736	5.2702	59.6222	11.2867	119.518	15.8139	86.4774	14.9243	G	Not in top 8000 most variable DETs	No
Solyc00g272810	N-acetyltransferase (B6SUK9_MAIZE)	234.183	42.2647	156.686	32.1792	81.8652	8.81337	129.647	16.0465	G	Not in top 8000 most variable DETs	No
Solyc02g078260	RNA polymerase II subunit 2 (manually curated)	3854.58	104.476	4345.89	104.094	4694.43	349.883	4999.09	130.355	G	brown	No
Solyc03g114450	Extracellular calcium sensing receptor (C7BCU7_LIQFO)	1463.16	16.3849	1186.57	63.5306	988.893	74.1388	1180.02	38.4522	G	yellow	No
Solyc03g043710	Receptor protein kinase-like protein (Q9LSL5_ARATH)	34.997	1.35323	42.2729	10.964	65.2563	5.60507	43.2484	6.50405	G	Not in top 8000 most variable DETs	No
Solyc03g097390	Acyl-ACP thioesterase (Q9FQY1_IRIGE)	121.947	17.3817	76.2266	10.1525	46.009	3.89147	55.9688	9.83291	G	Not in top 8000 most variable DETs	No
Solyc07g008320	Calcium-transporting ATPase 1 (Q7XBH9_CERRI)	4600.4	98.3084	4918.37	81.4954	3770.36	182.748	4617.76	249.447	G	turquoise	No
Solyc03g096850	Genomic DNA chromosome 5 P1 clone MKP11 (Q9FFJ2_ARATH)	2539.47	115.427	2050.91	150.309	1744.11	141.966	1976.66	20.9799	G	yellow	No
Solyc04g079430	Nucleobase ascorbate transporter (B9I1J7_POPTR)	1530.67	33.2952	1568.26	55.5559	1908.64	54.599	1748.9	66.9775	G	turquoise	No
Solyc03g096820	Aluminum-activated malate transporter-like (Q5Z6M4_ORYSJ)	866.662	35.9962	823.483	39.2293	688.463	12.5199	807.651	24.307	G	blue	No
Solyc03g006610	Arf-GAP with GTPase, ANK repeat and PH domain-containing protein 1 (AGAP1_XENLA)	310.151	18.5514	298.056	3.64753	231.833	3.32101	253.073	30.2494	G	Not in top 8000 most variable DETs	No
Solyc04g051780	Programmed cell death protein 2 (C1BKK3_OSMMO)	432.328	23.3785	482.717	13.7245	538.28	5.07138	523.57	11.6806	G	Not in top 8000 most variable DETs	No
Solyc09g008630	DNA replication complex GINS protein PSF1 (B6THR1_MAIZE)	107.22	7.47065	99.8751	11.6251	160.054	8.8559	135.409	10.298	G	Not in top 8000 most variable DETs	No
Solyc10g055190	Dirigent-like protein (A6YQZ7_PICSI)	90.5336	13.5075	121.632	7.05692	202.654	17.3037	159.611	19.0284	G	Not in top 8000 most variable DETs	No
Solyc04g009660	Cc-nbs-lrr, resistance protein	240.101	7.13676	211.304	11.6466	166.608	11.6759	163.409	14.694	G	Not in top 8000 most variable DETs	No
Solyc01g097860	Membrane protein (A8JG04_CHLRE)	2116.92	67.1243	1963.89	37.15	1652.98	177.477	1814.85	27.7074	G	yellow	No
Solyc12g055930	UDP-glucose 4-epimerase (Q6XZA0_SOLTU)	413.92	19.2252	440.546	34.4226	560.545	6.10683	485.644	17.0599	G	Not in top 8000 most variable DETs	No
Solyc11g007480	UDP-glucuronosyltransferase 1-1 (UD11_HUMAN)	50.1088	3.62749	43.9691	5.54777	26.4105	4.6253	32.1876	5.11807	G	Not in top 8000 most variable DETs	No
Solyc12g055720	Receptor like kinase, RLK	1907.4	34.8698	1845.71	45.6418	1545.48	23.1349	1612.13	26.5695	G	turquoise	No
Solyc01g109860	Phosphatidylinositol/phosphatidylcholine transfer protein-like (Q9LRX7_ARATH)	607.893	64.7491	866.486	92.8437	983.594	133.295	1146.87	67.9492	G	turquoise	No
Solyc12g036790	NADH-ubiquinone oxidoreductase subunit (C1GT14_PARBA)	2568.56	167.436	2703.56	85.8335	3729	141.06	3275.54	196.586	G	turquoise	No
Solyc05g055170	Charged multivesicular body protein 5 (B6TYU1_MAIZE)	522.715	14.028	542.523	11.9229	662.34	22.4069	665.432	31.9823	G	Not in top 8000 most variable DETs	No
Solyc09g075860	Lipoxygenase (Q41430_SOLTU)	640.806	20.7172	602.665	31.0254	506.817	25.514	587.433	21.0016	G	Not in top 8000 most variable DETs	No
Solyc05g014130	COP1-interacting protein 4 (Q9C5U5_ARATH)	575.726	15.145	562.244	23.3544	779.91	43.5842	651.397	23.9481	G	blue	No
Solyc04g074900	40S ribosomal protein S21 (D7M5J1_ARALY)	25.9957	3.87183	27.3591	6.1403	51.9604	7.44598	43.1724	3.45854	G	Not in top 8000 most variable DETs	No
Solyc03g025410	Dehydrogenase/reductase SDR family member 13 (DHR13_BOVIN)	505.966	14.3534	464.309	44.995	284.474	40.3689	393.723	14.6494	G	yellow	No
Solyc01g099480	Unknown Protein; contains Interpro domain(s) IPR015940 Ubiquitin-associated/translation elongation factor EF1B, N-terminal, eukaryote	146.511	7.86472	154.392	10.2013	90.9764	8.23477	101.399	11.6144	G	Not in top 8000 most variable DETs	No
Solyc06g071480	Dof zinc finger protein 12 (A5HWG1_HORVD)	280.959	13.0209	231.514	9.03365	180.794	12.9129	183.724	12.0703	G	Not in top 8000 most variable DETs	No
Solyc12g098300	Unknown Protein	29.0222	6.9461	44.2809	11.753	66.0487	10.1257	43.9818	5.12896	G	Not in top 8000 most variable DETs	No
Solyc01g090860	Poly(A) RNA polymerase protein 1 (TRF5_YEAST)	1904.65	35.5045	1924.11	35.3402	1484.91	89.9412	1705.84	89.7973	G	turquoise	No
Solyc05g054620	Amino acid binding protein (B6TDN9_MAIZE)	1682.36	87.1459	1790.06	39.1288	2216.44	151.504	1949.33	200.104	G	purple	No
Solyc06g051260	Transcription factor bHLH51 (BH051_ARATH)	53.4616	2.83624	37.9306	4.21536	20.7326	6.11791	26.9593	1.83789	G	Not in top 8000 most variable DETs	No
Solyc03g005960	protein kinase LESK1 (manually curated)	833.418	16.7962	645.094	33.8986	496.168	53.1541	540.437	17.7156	G	turquoise	No
Solyc06g054090	Ribosomal-protein-alanine N-acetyltransferase (D3FS71_BACPE)	18.3432	1.93958	14.279	2.92315	7.14419	2.00278	8.72161	0.601181	G	Not in top 8000 most variable DETs	No
Solyc02g090870	Unknown Protein	357.435	18.8499	359.196	16.7707	561.222	45.9176	438.785	28.9757	G	turquoise	No
Solyc02g081310	50S ribosomal protein L15 (D0P1Y0_PHYIN)	864.605	19.6704	862.785	36.8223	1111.25	54.5633	974.517	35.5305	G	turquoise	No
Solyc03g116640	Genomic DNA chromosome 3 P1 clone MSJ11 (Q9LW02_ARATH)	54.7382	3.49523	55.5159	6.96624	85.789	5.0787	65.8012	5.2432	G	Not in top 8000 most variable DETs	No
Solyc07g044860	psbXphotosystem II 23 kDa protein (manually curated)	18101.5	549.527	14822.8	684.767	11160.4	1330.17	12559.8	475.49	G	yellow	No
Solyc12g088720	Polyadenylate-binding protein 2 (B6U4M0_MAIZE)	15085.5	200.711	16025.7	594.821	20437.6	727.644	18305.2	664.5	G	turquoise	No
Solyc04g079030	Anthocyanidin 3-O-glucosyltransferase (B6TRK5_MAIZE)	187.316	26.5708	236.604	35.7643	270.121	6.10766	219.229	6.24682	G	Not in top 8000 most variable DETs	No
Solyc12g055940	Unknown Protein	1336.66	38.8895	1282.59	90.3021	1057.48	80.7707	1315.8	21.5049	G	yellow	No
Solyc01g098000	Elongation factor-like protein (Q3HVL1_SOLTU)	1126.77	28.7005	1201.77	31.8334	1503.28	78.5138	1241.64	51.0548	G	turquoise	No
Solyc09g066120	Nucleic acid binding protein (B6U2B4_MAIZE)	168.281	9.89078	170.82	5.34704	241.113	8.40742	192.203	5.5664	G	Not in top 8000 most variable DETs	No
Solyc04g080330	Peroxidase (Q5W5I3_PICAB)	19.7963	1.01459	37.0054	10.6047	55.7427	1.73383	39.3977	3.25602	G	Not in top 8000 most variable DETs	No
Solyc10g051110	NAD dependent epimerase/dehydratase family protein (B0CAN3_ACAM1)	2682.32	113.599	2405.48	130.671	1735.5	189.817	2182.28	86.9098	G	yellow	No
Solyc04g056560	Protein phosphatase 2c (Q4L0F8_MEDSA)	1714.05	69.3252	1746.47	45.3945	2386.34	121.408	1974.13	57.756	G	turquoise	No
Solyc01g098960	Glycogenin-like protein (Q5NA53_ORYSJ)	16.9879	2.73369	25.3459	6.91479	34.2879	4.35529	30.0497	4.80149	G	Not in top 8000 most variable DETs	No
Solyc01g109830	Thymidylate synthase (D8LWN8_BLAHO)	1045.11	26.7566	1110.6	14.4586	1377.44	36.496	1256.63	41.0058	G	turquoise	No
Solyc05g026140	DUF647 domain-containing protein (C5JIY8_AJEDS)	1014.67	17.8444	925.63	54.919	786.413	50.1118	875.025	36.1954	G	yellow	No
Solyc06g073360	Unknown Protein	4424.07	63.232	4323.79	89.7142	6167.56	279.37	5151.4	131.317	G	turquoise	No
Solyc03g026240	Arginine/serine-rich splicing factor 31 (D7LSQ1_ARALY)	660.149	27.4107	695.861	9.16932	907.498	50.2883	776.325	28.5614	G	purple	No
Solyc07g052530	Peroxidase (Q07445_SOLLC)	520.351	84.0596	735.833	157.122	1208.51	152.365	756.314	47.3427	G	blue	No
Solyc06g076630	Peroxidase (C0KKH9_9CARY)	9468.05	273.608	9351.91	406.528	12378.1	730.28	10783.2	385.967	G	turquoise	No
Solyc09g011760	Mitochondrial import inner membrane translocase subunit Tim10 (TIM10_ARATH)	970.225	34.8358	911.128	51.2869	1252.72	57.4173	1022.71	45.7975	G	turquoise	No
Solyc08g068050	Os07g0193600 protein (Fragment) (Q0D802_ORYSJ)	141.619	4.70165	145.381	12.013	233.39	17.4634	193.047	18.3456	G	Not in top 8000 most variable DETs	No
Solyc09g092330	NAD dependent epimerase/dehydratase family protein expressed (Q2MJA7_ORYSJ)	1134.99	50.6572	1098.69	42.6755	774.435	43.5383	769.511	27.6888	G	turquoise	No
Solyc10g085100	Glycosyl transferase group 1 family protein (B6T479_MAIZE)	807.333	26.4121	724.948	38.1062	548.376	4.613	642.718	29.3847	G	blue	No
Solyc02g086100	Dermal papilla-derived protein 6 homolog (DERP6_DANRE)	124.012	4.55188	127.939	5.49103	170.796	13.5988	169.039	10.3122	G	Not in top 8000 most variable DETs	No
Solyc12g095930	Serine hydroxymethyltransferase (B9HDQ7_POPTR)	735.604	32.6416	729.873	33.1134	982.585	35.2392	850.911	18.656	G	turquoise	No
Solyc02g084590	GATA transcription factor 9 (B6STZ1_MAIZE)	309.054	9.35965	297.1	12.507	417.343	21.3866	333.879	30.6067	G	Not in top 8000 most variable DETs	No
Solyc06g076220	expansin18 (manually curated)	618.466	26.3018	528.974	48.1138	449.347	11.9489	446.372	19.565	G	turquoise	No
Solyc02g084350	NAC domain protein IPR003441 (B9HFJ5_POPTR)	69.1746	5.32135	53.1831	5.71302	31.4222	1.94422	35.1788	1.11095	G	Not in top 8000 most variable DETs	No
Solyc11g044910	Beta-xylosidase 1 (D7MNR6_ARALY)	1843.36	90.6695	2006.73	78.2907	4329.25	1091.52	3054.34	346.867	G	turquoise	No
Solyc02g086640	tRNA adenine-N1 methyltransferase catalytic subunit TRM61 (C1C0S4_9MAXI)	204.502	8.09225	214.375	6.89072	296.638	27.3144	276.778	7.52643	G	Not in top 8000 most variable DETs	No
Solyc08g081290	ARID/BRIGHT DNA-binding domain-containing protein/ELM2 domain-containing protein/Myb-like DNA-binding domain-containing protein (Q1PEA0_ARATH)	257.717	7.59186	250.058	3.62378	383.382	23.3155	317.333	16.2389	G	Not in top 8000 most variable DETs	No
Solyc08g044510	Beta-glucosidase D2 (B2ZUU1_LOTJA)	693.246	55.055	823.772	47.5258	937.839	13.8882	890.723	55.9533	G	turquoise	No
Solyc05g054100	Transmembrane protein 111 (TM111_DANRE)	1084.76	26.9478	1112.55	24.1495	1395.71	46.2157	1274.57	48.6507	G	turquoise	No
Solyc08g077060	Zinc finger protein LSD1 (Q6QUK7_ORYSJ)	1460.39	16.6885	1147.49	83.7876	682.468	76.2204	1049.44	64.3346	G	yellow	No
Solyc10g055760	NAC domain protein NAC6 (manually curated)	17.963	4.36978	18.0291	5.9138	4.42699	0.852504	9.73321	1.35861	G	Not in top 8000 most variable DETs	No
Solyc03g116370	Microtubule plus-end binding protein (B2LU37_BRANA)	176.282	7.43606	162.843	9.56397	253.274	20.7643	204.453	15.4566	G	Not in top 8000 most variable DETs	No
Solyc01g103780	TCP transcription factor 11 (manually curated)	1532.71	45.9315	1580.45	64.5582	1076.58	40.6651	1331.82	74.3445	G	blue	No
Solyc07g056540	glycolate oxidase X92888 (manually curated)	6393.07	412.167	4441.29	877.44	2951.26	391.625	3862.6	176.614	G	yellow	No
Solyc09g066270	LOB domain protein 14 (D7LD16_ARALY)	15.6987	3.38917	8.6843	1.8854	2.01423	1.20955	2.30571	0.987816	G	Not in top 8000 most variable DETs	No
Solyc05g006580	Unknown Protein	250.951	3.63986	267.264	7.9366	349.436	14.0057	284.658	13.745	G	Not in top 8000 most variable DETs	No
Solyc02g062000	RUN and FYVE domain-containing protein 1 (B0WS48_CULQU)	1271.64	50.9015	1227.16	14.753	984.572	16.4806	1164.87	56.6732	G	turquoise	No
Solyc02g072510	SAP30 binding protein (Q7ZUQ6_DANRE)	377.689	13.6925	414.255	10.5666	481.582	12.1815	490.769	17.0075	G	Not in top 8000 most variable DETs	No
Solyc06g009660	ADP-ribosylation factor-like protein 3 (ARL3_CAEEL)	433.214	28.9512	451.189	18.524	577.567	15.7548	512.411	16.0968	G	Not in top 8000 most variable DETs	No
Solyc02g094590	Transcription-repair coupling factor (B4WRL4_9SYNE)	1653.65	37.4658	1420.6	79.1668	1265.03	36.7208	1459.68	32.4017	G	blue	No
Solyc06g030470	Auxin-regulated protein (Q945F5_SOLLC)	220.273	9.34481	167.895	8.10475	135.06	7.65676	173.74	10.4797	G	Not in top 8000 most variable DETs	No
Solyc05g005700	Aldehyde dehydrogenase 1 (Q84V96_LOTCO)	490.789	40.6743	541.156	23.0086	783.206	91.5129	662.896	39.8783	G	turquoise	No
Solyc02g088780	Ribosome biogenesis protein ytm1 (C8V8H1_EMENI)	200.603	14.494	199.275	11.9574	296.991	11.355	219.541	6.38104	G	Not in top 8000 most variable DETs	No
Solyc03g112140	Serine/threonine protein kinase (D0NNA3_PHYIN)	504.49	19.8816	500.636	14.5574	716.13	37.9726	607.613	13.5211	G	turquoise	No
Solyc02g094040	Lipase (Q1XBG1_RICCO)	6.36061	0.866842	10.6192	1.48185	22.4257	3.62365	13.329	0.48308	G	Not in top 8000 most variable DETs	No
Solyc12g062290	Serine protease (D8UJN6_VOLCA)	614.719	23.1976	616.771	23.5674	783.842	31.4231	733.948	36.058	G	turquoise	No
Solyc04g077190	Endo-1 4-beta-xylanase (B6SW51_MAIZE)	1304.28	48.0506	1176.54	65.2397	851.594	158.909	1010.8	36.1774	G	magenta	No
Solyc11g067310	Uncharacterized ABC transporter ATP-binding protein/permease C9B6.09c (YNT9_SCHPO)	68.1449	14.6862	87.5247	27.3789	153.518	11.397	118.83	14.0022	G	Not in top 8000 most variable DETs	No
Solyc09g007830	Cytokinin riboside 5&apos;-monophosphate phosphoribohydrolase LOG (LOG_ORYSJ)	475.876	20.1359	540.538	23.794	653.982	15.5733	545.638	24.044	G	Not in top 8000 most variable DETs	No
Solyc01g100020	Phospholipase D (A3KH17_ARATH)	95.918	10.1452	98.8918	10.5302	54.6853	5.53501	79.0059	3.31251	G	Not in top 8000 most variable DETs	No
Solyc02g067690	Glucosyltransferase-like protein (Q9LEQ4_ARATH)	77.9223	5.75104	52.1407	9.88175	32.0077	2.60168	51.7131	7.15585	G	Not in top 8000 most variable DETs	No
Solyc01g104810	Integral membrane protein (B6U6B5_MAIZE)	37.6162	1.83546	41.9654	1.18151	74.9623	8.54605	50.2991	3.90895	G	Not in top 8000 most variable DETs	No
Solyc05g015890	Genomic DNA chromosome 5 TAC clone K24M7 (Q9FHB8_ARATH)	2.19441	1.1408	9.00936	2.1003	78.2302	32.8281	28.7618	14.1545	G	Not in top 8000 most variable DETs	No
Solyc02g086180	Sterol C-5 desaturase (D7FW86_ECTSI)	485.316	26.6987	697.533	154.905	868.782	10.1071	752.983	19.8739	G	turquoise	No
Solyc07g055080	Proteasome subunit alpha type (Q38M52_SOLTU)	451.45	35.8731	436.802	19.7912	572.638	23.3527	489.383	18.6788	G	Not in top 8000 most variable DETs	No
Solyc08g067260	Fatty acid elongase 3-ketoacyl-CoA synthase (Q6DUV6_BRANA)	3651.71	91.4307	3561.47	40.3574	2862.35	212.623	3226.12	114.006	G	turquoise	No
Solyc05g050230	Ubiquitin-conjugating enzyme E2 10 (UBC10_ARATH)	2676.45	60.1883	3226.88	262.269	3424.07	160.329	3126.12	59.9697	G	yellow	No
Solyc03g117490	Glycerol kinase (Q6RUF8_SOYBN)	1463.14	60.0538	1683.14	30.8793	1867.54	53.1276	1892.3	61.7489	G	turquoise	No
Solyc02g062100	Senescence-associated protein 12 (O81657_HEMSP)	530.628	20.2513	427.68	13.3006	376.45	7.20783	417.522	15.7053	G	Not in top 8000 most variable DETs	No
Solyc03g120970	Gibberellin 2-beta-dioxygenase 2 (G2OX2_ARATH)	370.036	11.8369	372.838	21.0282	246.477	15.4558	283.247	12.0414	G	Not in top 8000 most variable DETs	No
Solyc10g006080	Sodium/hydrogen exchanger (D7MKH9_ARALY)	1.98879	0.835505	1.07769	0.420735	86.2848	41.1024	28.5339	16.2262	G	Not in top 8000 most variable DETs	No
Solyc01g079220	NifU like protein (B8BR62_THAPS)	753.205	38.7498	659.582	22.7286	600.634	25.8908	667.715	23.1893	G	Not in top 8000 most variable DETs	No
Solyc05g056350	Cleft lip and palate associated transmembrane protein-like (Q9FNN8_ARATH)	3022.08	79.058	3374.22	70.4475	4014.73	189.093	3601.77	91.2403	G	yellow	No
Solyc02g092670	Subtilisin-like protease (A9XG40_TOBAC)	1452.28	60.6115	1323.75	33.4041	943.743	99.1116	1234.36	53.1217	G	blue	No
Solyc09g010440	Actin-depolymerizing factor 1 (B2CM17_SOLCH)	2740.89	55.8162	2891.14	88.582	3397.76	199.19	3376.25	128.176	G	turquoise	No
Solyc03g112460	Alliinase (Fragment) (Q94EJ8_ALLFI)	274.742	14.9546	224.287	8.71078	206.635	13.6471	262.853	14.5471	G	Not in top 8000 most variable DETs	No
Solyc08g006930	Photosystem I reaction center subunit X psaK (Q84QE6_TOBAC)	3523.45	33.3484	2724.83	68.5327	2098.1	254.49	2307.12	139.587	G	yellow	No
Solyc03g118770	WUSCHEL-related homeobox-containing protein 4 (C0LAL8_9MAGN)	223.327	14.9735	165.535	17.0701	131.123	8.41433	157.576	9.90826	G	Not in top 8000 most variable DETs	No
Solyc10g007150	Apoptosis inhibitor (B0WCI8_CULQU)	1252.23	26.7658	1301.33	21.3247	1636.59	49.4975	1578.54	65.2034	G	turquoise	No
Solyc03g007030	CDGSH iron sulfur domain-containing protein 1 (B5X1R9_SALSA)	206.47	16.3512	135.325	21.0085	130.51	8.1567	163.947	10.6123	G	Not in top 8000 most variable DETs	No
Solyc04g049450	Protein disulfide isomerase L-2 (B1Q2X5_SOYBN)	3238.1	24.4758	3410.72	111.65	4131.35	237.934	3923.57	178.208	G	turquoise	No
Solyc00g005840	Thioredoxin family protein (D7MCJ1_ARALY)	445.261	16.9231	430.862	24.1569	316.849	14.0051	355.673	15.4478	G	Not in top 8000 most variable DETs	No
Solyc08g075100	Alpha/beta superfamily hydrolase (B9P114_PROMA)	506.087	12.5389	486.908	19.6642	372.667	20.4577	396.715	22.5744	G	Not in top 8000 most variable DETs	No
Solyc03g094000	Light harvesting-like protein 3 (A9P991_POPTR)	18937.4	246.522	16530.3	414.713	15299.9	848.894	15569	328.82	G	turquoise	No
Solyc03g093450	Receptor-like protein kinase (Q9FZP2_ARATH)	77.648	8.11001	76.7719	9.71191	36.5891	1.58092	50.6946	6.30142	G	Not in top 8000 most variable DETs	No
Solyc08g076920	ADP-ribosylation factor GTPase-activating protein 3 (B6TII3_MAIZE)	1391.41	62.1026	1521.23	20.7553	1720.26	90.3137	1601.09	65.6999	G	turquoise	No
Solyc05g009170	Zinc finger protein 6 (B6T066_MAIZE)	98.5702	5.70885	83.1745	9.04429	51.3127	6.09374	57.753	5.28894	G	Not in top 8000 most variable DETs	No
Solyc11g011300	Rhamnogalacturonate lyase (A3XLZ2_LEEBM)	80.7873	6.56975	53.5793	5.98846	40.4152	6.88766	48.3973	3.91224	G	Not in top 8000 most variable DETs	No
Solyc06g066560	tonoplast intrinsic protein 2.5 (manually curated)	93.148	11.9772	115.074	14.716	140.568	10.277	154.336	6.88961	G	Not in top 8000 most variable DETs	No
Solyc10g085460	Cc-nbs-lrr, resistance protein	559.552	16.11	607.006	16.34	437.597	13.9281	533.664	24.4762	G	Not in top 8000 most variable DETs	No
Solyc05g012070	UDP-glucose:protein transglucosylase-like protein (manually curated)	2315.7	84.8458	2582.37	274.193	3605.61	200.942	2963.72	173.452	G	turquoise	No
Solyc12g015870	Calcineurin B-like protein 02 (A5BYS8_VITVI)	1489.07	67.1001	1633.21	57.146	1890.17	57.4544	1752.21	50.463	G	turquoise	No
Solyc12g098390	Serine/threonine-protein phosphatase 6 regulatory ankyrin repeat subunit A (ANR28_MOUSE)	173.353	4.95668	174.633	11.5253	103.264	2.2898	130.701	8.40898	G	Not in top 8000 most variable DETs	No
Solyc01g094830	Receptor-like protein kinase (Q39203_ARATH)	856.73	18.8205	722.261	48.453	540.783	20.8539	623.634	21.4728	G	turquoise	No
Solyc01g111630	Glyoxylate/hydroxypyruvate reductase B (GHRB_YERPS)	6089	183.607	5140.51	329.038	4061.52	372.552	5033.25	166.325	G	yellow	No
Solyc06g005670	mRNA binding protein Pumilio 2 (C1GCQ9_PARBD)	2159.34	9.05042	2507.97	16.2672	2638.6	151.724	2723.99	74.6426	G	turquoise	No
Solyc05g023830	Unknown Protein	272.711	30.2973	272.765	22.8472	178.901	13.5645	199.869	15.4726	G	Not in top 8000 most variable DETs	No
Solyc10g018320	Pectinesterase (C0PST8_PICSI)	15.0385	4.31142	22.0726	3.66073	39.3173	4.39699	32.167	2.97559	G	Not in top 8000 most variable DETs	No
Solyc11g032050	GDSL esterase/lipase At1g71691 (GDL29_ARATH)	83.1991	7.73847	91.757	4.00905	143.586	21.6053	88.1485	4.70351	G	Not in top 8000 most variable DETs	No
Solyc12g006790	Argonaute10b (manually curated)	197.051	10.4376	209.85	21.3085	299.852	29.7343	278.225	9.1292	G	Not in top 8000 most variable DETs	No
Solyc01g014380	Unknown Protein	70.7071	4.5183	73.0825	6.19523	45.5117	5.25279	65.2458	3.73774	G	Not in top 8000 most variable DETs	No
Solyc03g082500	serine/threonine protein kinase pk23 (manually curated)	991.314	16.7095	974.753	30.4378	746.79	31.7831	844.482	7.28009	G	blue	No
Solyc10g007290	Phosphoenolpyruvate carboxylase (A6YM32_RICCO)	3481.45	190.322	4464.14	386.209	5069.36	359.822	5534.12	273.016	G	turquoise	No
Solyc07g063320	LanC-like protein 2 (B6TCV9_MAIZE)	1.0262	0.089907	1.61549	0.670824	124.875	55.2414	32.6508	17.6934	G	Not in top 8000 most variable DETs	No
Solyc05g050110	cDNA clone J013073A18 full insert sequence (B7EPF9_ORYSJ)	552.245	14.8662	517.402	9.89588	402.782	21.537	457.416	16.4139	G	Not in top 8000 most variable DETs	No
Solyc03g111640	Eukaryotic translation initiation factor 4 gamma 2 (Fragment) (A3KQB2_DANRE)	3054.79	60.6734	3503.35	47.0916	4135.34	217.943	4121.55	48.8905	G	turquoise	No
Solyc08g048450	ornithine aminotransferase (manually curated)	892.566	26.8632	928.821	16.4023	1186.47	84.2511	1115.43	44.2591	G	turquoise	No
Solyc06g048610	Methionyl-tRNA synthetase-like protein (Q8RUP8_ORYSJ)	926.661	29.0095	870.891	26.5674	1178.79	53.5832	1069.74	44.2706	G	turquoise	No
Solyc02g087330	B12D-like protein (D2XQY6_WOLAR)	789.203	25.4146	830.355	15.2116	1090.7	75.9109	938.594	69.9697	G	turquoise	No
Solyc08g082200	DNA primase (B6T4S3_MAIZE)	115.62	8.4588	117.87	6.43956	171.222	14.3162	151.31	14.9585	G	Not in top 8000 most variable DETs	No
Solyc04g081400	plastidic hexokinase (manually curated)	577.643	34.2784	512.314	28.3291	359.911	11.196	429.266	27.8779	G	turquoise	No
Solyc04g082070	tRNA pseudouridine synthase family protein (B6TLN6_MAIZE)	739.363	22.1606	715.974	4.47663	927.298	51.3265	820.958	42.3824	G	turquoise	No
Solyc00g318130	Paired amphipathic helix protein SIN3 (B3LJ52_YEAS1)	4.35547	2.01159	6.21263	2.34713	21.2734	7.13035	7.9062	1.22173	G	Not in top 8000 most variable DETs	No
Solyc03g121490	Unknown Protein	763.521	18.0026	865.467	20.3272	995.915	10.1459	971.724	15.8288	G	greenyellow	No
Solyc06g069730	Chlorophyll a-b binding protein 4, chloroplastic (CA4_ARATH)	59.5183	5.37793	59.1297	16.8863	27.1786	9.64835	30.3849	2.53308	G	Not in top 8000 most variable DETs	No
Solyc02g069110	Cathepsin B (Q1HER6_NICBE)	368.13	23.8063	242.258	38.5294	249.223	19.5596	280.356	19.7091	G	Not in top 8000 most variable DETs	No
Solyc05g007940	LERNALX L.esculentum ribonuclease lx (manually curated)	535.15	8.55638	691.91	42.9657	1098.6	393.148	771.046	172.165	G	turquoise	No
Solyc10g085740	GDSL esterase/lipase At5g03820 (GDL73_ARATH)	492.782	135.786	625.586	142.289	5961.75	2580.62	1817.66	744.457	G	turquoise	No
Solyc08g075560	Unknown Protein	1667.75	125.555	1598.76	75.6797	1376.69	81.3047	1375.99	26.4592	G	turquoise	No
Solyc07g049370	Glucan endo-1 3-beta-glucosidase A6 (B6TIF7_MAIZE)	3325.97	16.0793	3208.61	67.4581	4004.85	108.604	3428.01	99.6402	G	blue	No
Solyc04g064930	Alkyl hydroperoxide reductase/ Thiol specific antioxidant/ Mal allergen (D5BYP3_NITHN)	1129.84	76.3789	912.556	96.9333	873.042	56.6295	998.005	23.793	G	yellow	No
Solyc01g100880	MtN21 nodulin protein-like (B6TBZ6_MAIZE)	145.497	48.7251	107.223	23.3395	590.438	255.101	272.282	107.89	G	turquoise	No
Solyc08g081620	LEU13054 endo-1,4-beta-glucanase precursor (manually curated)	296.325	57.346	492.613	113.546	760.605	226.647	720.333	144.982	G	turquoise	No
Solyc10g047250	Unknown Protein	588.159	20.4021	619.97	35.4832	816.584	58.8327	729.355	27.344	G	turquoise	No
Solyc03g112590	Cell division protease ftsH homolog (FTSH_ODOSI)	48.8454	5.81628	51.1496	3.45436	134.75	52.7193	71.0048	22.853	G	Not in top 8000 most variable DETs	No
Solyc11g010890	Exostosin family protein (D7M9K9_ARALY)	454.38	13.3455	473.604	17.1941	532.124	24.0981	541.535	6.82379	G	Not in top 8000 most variable DETs	No
Solyc10g084950	Solute carrier family 15 member 4 (S15A4_XENLA)	179.763	15.5255	189.316	8.28579	270.139	43.0691	195.15	19.069	G	Not in top 8000 most variable DETs	No
Solyc09g050050	Photosystem Q(B) protein (B6VJV1_VITVI)	97.1063	7.28425	79.3195	7.51278	55.2312	12.3197	51.3378	5.62749	G	Not in top 8000 most variable DETs	No
Solyc12g013750	Mannan endo-1,4-beta-mannosidase 3 (MAN3_SOLLC)	972.722	151.652	1451.51	351.74	3509.74	1312.85	1604.34	512.594	G	turquoise	No
Solyc01g090550	DNAJ chaperone (B0W7V8_CULQU)	321.523	8.56992	343.142	23.9326	403.631	23.2087	413.888	25.4043	G	Not in top 8000 most variable DETs	No
Solyc12g006510	Cycloartenol Synthase (O82139_PANGI)	22.9848	3.84503	32.9676	6.32952	106.353	43.842	45.8658	15.1202	G	Not in top 8000 most variable DETs	No
Solyc06g084760	Cytochrome P450 monooxygenase CYP72A68 (Q2MJ19_MEDTR)	96.6836	3.27202	118.07	3.91281	70.3635	8.50065	97.3896	7.82198	G	Not in top 8000 most variable DETs	No
Solyc09g009770	Calmodulin binding protein (B6SL12_MAIZE)	594.51	27.7319	671.261	96.7268	433.794	39.5799	598.264	41.5794	G	blue	No
Solyc07g044760	RNA helicase DEAD23 (manually curated)	2534.61	35.7911	2427.95	156.728	3002.66	149.343	2869.37	125.004	G	turquoise	No
Solyc05g026180	NAC domain protein IPR003441 (B9H8X7_POPTR)	157.764	15.1781	143.188	6.40872	123.862	4.75827	126.271	5.27603	G	Not in top 8000 most variable DETs	No
Solyc04g071960	2,5-dichloro-2,5-cyclohexadiene-1,4-diol dehydrogenase (LINC_PSEPA)	367.677	27.2161	316.28	45.4751	282.906	12.2503	298.709	12.9162	G	Not in top 8000 most variable DETs	No
Solyc11g022530	Transmembrane protein 205 (B9EN72_SALSA)	32.2219	3.29411	33.6258	5.32341	98.4945	32.9168	66.1773	17.0695	G	Not in top 8000 most variable DETs	No
Solyc01g104130	Oxidoreductase 2OG-Fe(II) oxygenase family protein-like (Q5VPG6_ORYSJ)	456.055	11.2698	484.39	25.7043	566.262	14.0574	507.225	27.0651	G	Not in top 8000 most variable DETs	No
Solyc06g005840	Mitochondrial import inner membrane translocase subunit Tim10 (B6U5I0_MAIZE)	83.4728	6.4505	74.237	5.60986	117.328	7.56759	83.7267	2.27263	G	Not in top 8000 most variable DETs	No
Solyc12g089040	mature anther-specific protein LAT61 (manually curated)	1470.35	64.5396	1362.72	44.284	1249.14	29.0989	1246.06	21.4203	G	turquoise	No
Solyc06g060610	Flavin-containing monooxygenase family protein (D7KUN8_ARALY)	286.591	8.49617	328.908	21.8533	367.033	9.06483	381.184	12.6809	G	Not in top 8000 most variable DETs	No
Solyc02g085150	LEA-like protein (Q8L5P5_LILLO)	9.32082	0.815448	11.285	2.74773	39.7852	16.2048	23.5695	9.68326	G	Not in top 8000 most variable DETs	No
Solyc02g072170	Unknown Protein	62.5819	3.85229	55.434	3.59674	39.2962	8.46923	37.6979	4.42597	G	Not in top 8000 most variable DETs	No
Solyc10g009430	Diacylglycerol O-acyltransferase (Q124V7_POLSJ)	48.6382	5.67035	80.0236	1.90995	121.991	43.8796	117.959	21.933	G	Not in top 8000 most variable DETs	No
Solyc08g076120	FAM96B protein (A8NHC1_COPC7)	38.4736	1.29613	37.4788	1.73493	53.9975	4.62655	50.3981	3.19794	G	Not in top 8000 most variable DETs	No
Solyc12g044890	Transmembrane 9 superfamily protein member 4 (B6SXZ2_MAIZE)	64.1626	5.01785	70.9354	3.58521	87.3038	2.69327	73.5375	7.16432	G	Not in top 8000 most variable DETs	No
Solyc08g065430	N-myc downstream regulated protein 3 (Fragment) (C8CBI7_9SMEG)	545.842	17.0131	553.086	58.2487	428.519	27.7759	514.385	20.6547	G	Not in top 8000 most variable DETs	No
Solyc08g008330	Unknown Protein	527.795	16.4264	553.03	29.3499	652.387	32.6463	642.476	5.6428	G	Not in top 8000 most variable DETs	No
Solyc03g019790	alpha-galactosidase (manually curated)	749.401	37.7778	718.086	27.1719	1116.22	207.182	867.929	53.6348	G	turquoise	No
Solyc12g010820	Group 3 late embryogenesis abundant protein (Q2N1E0_PHAVU)	604.258	11.6508	665.218	13.6208	876.836	144.066	807.242	95.7924	G	purple	No
Solyc01g107860	CBS domain-containing protein-like (B8AP73_ORYSI)	782.532	33.0379	762.603	22.9409	658.836	12.6092	685.866	18.0044	G	Not in top 8000 most variable DETs	No
Solyc02g069100	Cathepsin B (Q1HER6_NICBE)	2989.18	80.8015	3041.77	411.457	5481.71	1443.38	3726.97	615.487	G	turquoise	No
Solyc07g007550	Heparanase (A2Y9Y7_ORYSI)	2818.58	36.6751	2622.85	231.464	3869.64	606.982	3013.1	216.025	G	turquoise	No
Solyc10g083370	Unknown Protein	623.847	53.4879	757.165	27.8932	1067.41	315.698	1083.16	133.738	G	turquoise	No
Solyc10g047670	Receptor expression-enhancing protein 2 (B2WDX2_PYRTR)	398.155	8.72985	375.676	25.797	316.015	18.5798	367.126	21.0781	G	Not in top 8000 most variable DETs	No
Solyc09g010470	UNC93-like protein MFSD11 (MFS11_MOUSE)	916.141	21.7559	857.383	25.5923	751.1	37.3532	760.186	13.2671	G	yellow	No
Solyc06g072670	Short-chain dehydrogenase/reductase SDR (Q08PN0_STIAU)	25.3033	5.10308	25.2352	4.8781	139.437	58.3194	64.0104	27.0618	G	Not in top 8000 most variable DETs	No
Solyc01g102680	Receptor like kinase, RLK	324.075	6.35731	424.694	39.1472	218.251	27.5997	293.647	59.9582	G	pink	No
Solyc03g046380	Seed maturation protein PM41 (Q9SWB2_SOYBN)	51.4234	3.92389	44.2309	8.97879	152.444	57.3698	92.7937	36.1042	G	Not in top 8000 most variable DETs	No
Solyc02g089860	GNS1/SUR4 membrane family protein (D7MBD4_ARALY)	641.363	58.1984	566.094	50.5797	817.026	22.6926	656.539	22.9924	G	blue	No
Solyc03g117630	heat shock protein (B2D2G5_CAPSN)	566.734	277.741	307.913	26.479	289.991	19.0404	410.714	12.5261	G	grey	No
Solyc10g083790	ob37926-Solyc10g083790 (manually curated)	812.397	24.9842	693.197	41.5332	657.226	24.1704	745.92	25.4117	G	Not in top 8000 most variable DETs	No
Solyc03g120430	Glycerate kinase (C1DYY5_9CHLO)	1965.94	33.0969	1679.75	91.8719	1635.16	79.2377	1847.08	57.7636	G	yellow	No
Solyc03g093400	Sugar transporter protein 15 (manually curated)	38.2875	3.6707	57.9117	12.4386	65.7538	6.40694	39.9995	5.64601	G	Not in top 8000 most variable DETs	No
Solyc07g064920	SWIb domain-containing protein (Q1PCH7_SOLCH)	127.341	1.97548	117.273	3.47593	170.081	6.44924	148.424	3.58615	G	Not in top 8000 most variable DETs	No
Solyc11g010500	Mitochondrial carrier family (C1MMX1_MICPS)	1615.63	49.6805	1890.13	297.176	1194.54	90.27	1430.81	41.0632	G	blue	No
Solyc02g071700	GDSL esterase/lipase At1g29670 (GDL15_ARATH)	3002.45	217.847	3369.6	373.256	4999.91	707.572	4076.22	735.331	G	turquoise	No
Solyc03g006430	Os11g0198100 protein (Fragment) (Q0IU20_ORYSJ)	828.279	23.6605	799.75	64.4972	984.762	31.9784	933.353	27.47	G	blue	No
Solyc06g074420	Cytochrome P450	410.421	46.943	410.245	57.0926	269.229	42.4359	351.601	32.6419	G	blue	No
Solyc01g068240	Ubiquitin carboxyl-terminal hydrolase (D7MBK9_ARALY)	688.647	27.0722	656.782	18.0801	832.576	48.8803	767.868	33.6138	G	turquoise	No
Solyc07g039190	Unknown Protein	732.638	20.5445	642.766	39.0947	581.36	57.9417	741.546	35.6759	G	yellow	No
Solyc01g108230	LAG1 longevity assurance homolog 2 (C1BLI2_OSMMO)	424.528	11.0821	472.47	22.7748	527.202	3.55904	479.764	29.7961	G	Not in top 8000 most variable DETs	No
Solyc11g005830	NifS-like protein Aminotransferase class V family (Q30U90_SULDN)	128.283	11.3094	197.393	14.0262	65.6189	10.3153	315.875	12.1294	G	black	No
Solyc05g010430	Aminoalcoholphosphotransferase (Q8W1E9_BRARP)	97.5812	8.37955	104.227	4.89298	126.687	5.33763	133.024	5.52559	G	Not in top 8000 most variable DETs	No
Solyc05g055110	Unknown Protein	1250.41	36.0513	1402.31	41.1815	1590.61	197.67	1600.74	105.478	G	turquoise	No
Solyc04g078920	Peroxisomal multifunctional enzyme type 2 (B6TQ98_MAIZE)	3030.74	143.14	3059.27	140.492	4213.96	541.392	3294.31	386.605	G	turquoise	No
Solyc04g076290	Os12g0425600 protein (Fragment) (Q0INN2_ORYSJ)	495.249	8.22989	557.773	18.3859	610.377	15.3589	625.916	10.1624	G	Not in top 8000 most variable DETs	No
Solyc09g091200	Serine incorporator 1 (B5X3W1_SALSA)	29.0674	4.96516	24.1745	2.50504	14.7469	0.568108	15.3337	1.26933	G	Not in top 8000 most variable DETs	No
Solyc02g037530	auxin response factor 8B (manually curated)	2962.57	102.203	2927.71	88.5605	3521.51	126.323	3246.67	27.7176	G	turquoise	No
Solyc03g063240	Pyridoxamine 5&apos-phosphate oxidase-related FMN-binding protein (D6UPC6_9BACT)	1966.32	27.8631	1816.42	74.0452	1626.39	43.8937	1760.42	24.3938	G	yellow	No
Solyc02g089070	Eukaryotic translation initiation factor 3 subunit M (B2WFL9_PYRTR)	2106.91	75.5906	2078.11	14.7538	2475.83	80.8335	2225.55	53.2373	G	turquoise	No
Solyc03g120380	ob19997-Solyc03g120380 (manually curated)	45.4379	7.61336	42.4805	6.39102	28.4275	2.08354	31.0838	2.28529	G	Not in top 8000 most variable DETs	No
Solyc11g072270	Calmodulin (B6T4U8_MAIZE)	1084.54	15.0021	1062.93	45.6519	1248.45	47.3053	1169.04	32.0947	G	turquoise	No
Solyc07g049480	Cleavage and polyadenylation specificity factor subunit 3 (B5X1A0_SALSA)	514.88	12.8621	548.637	12.8577	604.297	38.1494	573.284	2.00359	G	Not in top 8000 most variable DETs	No
Solyc01g104960	Unknown Protein	32.1441	2.08811	26.0134	3.59435	17.08	1.69591	15.7726	1.61229	G	Not in top 8000 most variable DETs	No
Solyc11g071990	Nitric oxide reductase FlRd-NAD(+) reductase (NORW_VIBFM)	299.518	13.7851	343.447	23.8648	245.076	5.69771	300.752	17.2735	G	Not in top 8000 most variable DETs	No
Solyc03g117760	Unknown Protein	905.051	31.1355	864.092	15.6984	789.237	44.4797	784.625	17.5843	G	Not in top 8000 most variable DETs	No
Solyc04g081120	Glyoxal oxidase (B6TJK4_MAIZE)	18.4761	2.10533	22.0789	6.02598	33.7874	1.25563	32.9896	4.59516	G	Not in top 8000 most variable DETs	No
Solyc03g116100	R2R3MYB transcription factor 31 (manually curated)	247.879	17.7814	300.243	12.5396	319.964	23.596	316.073	22.0732	G	Not in top 8000 most variable DETs	No
Solyc04g080240	PERQ amino acid-rich with GYF domain-containing protein 2 (PERQ2_MOUSE)	4293.38	152.786	4760.57	99.3143	5149.96	306.681	5444.75	225.902	G	turquoise	No
Solyc02g032860	Phosphoadenosine phosphosulfate reductase (A6EX37_9ALTE)	1048.23	248.687	1046.46	107.988	614.991	65.3113	999.779	122.095	G	blue	No
Solyc09g064590	Pre-mRNA-processing factor 39 (C5FSC0_NANOT)	2231.79	55.5013	2327.93	43.0235	2682.56	65.0762	2673.39	75.4023	G	turquoise	No
Solyc09g089670	Nicotiana lesion-inducing like (B6T757_MAIZE)	1617.23	7.83263	1758.57	130.95	2070.96	167.685	1819.9	63.9447	G	blue	No
Solyc01g094910	ferric-chelate reductase (manually curated)	150.03	13.2594	135.038	7.46917	272.842	80.0156	188.586	40.4198	G	turquoise	No
Solyc12g056160	Cation/H(+) antiporter 18 (CHX18_ARATH)	66.6813	4.23438	79.6047	5.74173	98.6563	8.72739	75.4082	7.03488	G	Not in top 8000 most variable DETs	No
Solyc08g005940	Trypsin proteinase inhibitor (Q1WL38_NICAC)	88.5252	11.1058	117.704	8.83963	376.979	154.497	234.471	68.0469	G	turquoise	No
Solyc09g059440	CDC45 (Cell division cycle 45)-like protein (Q9LSG6_ARATH)	161.355	7.31414	155.51	8.10933	233.204	22.8062	212.549	34.2389	G	Not in top 8000 most variable DETs	No
Solyc07g042230	Ethylene-responsive transcription factor 7 (ERF83_ARATH)	8.81638	1.54515	16.5043	6.65543	44.8812	19.0523	34.1472	17.8835	G	Not in top 8000 most variable DETs	No
Solyc02g078540	Unknown Protein; contains Interpro domain(s) IPR000996 Clathrin light chain	3745.22	86.2306	3616	148.313	4505.98	207.028	4345.29	79.1037	G	turquoise	No
Solyc03g120990	Malic enzyme (O04935_SOLLC)	256.695	9.39039	204.076	31.9475	195.475	13.1533	230.275	9.67314	G	Not in top 8000 most variable DETs	No
Solyc04g016360	S-formylglutathione hydrolase (D2D314_GOSHI)	3298.53	159.602	3072.21	71.3875	4112.57	403.798	3671.92	227.338	G	turquoise	No
Solyc07g042490	SAUR33-auxin-responsive SAUR family member (B6T035_MAIZE)	161.252	15.3076	155.224	7.08017	250.447	31.8192	175.677	27.3774	G	Not in top 8000 most variable DETs	No
Solyc11g069690	Protein disulfide isomerase (Q5EUD4_MAIZE)	393.41	14.8053	348.658	15.954	491.663	25.5146	414.032	12.2933	G	Not in top 8000 most variable DETs	No
Solyc06g051270	GDP-D-mannose pyrophosphorylase 2	833.597	57.2858	950.978	53.5797	1001.61	33.3871	1093.16	26.082	G	turquoise	No
Solyc09g064450	NADH dehydrogenase (Ubiquinone) (D7FUY2_ECTSI)	3530.62	11.4437	3475.8	127.001	4180.11	181.415	4035.91	181.961	G	turquoise	No
Solyc03g034320	Class I glutamine amidotransferase (D4V3L4_BACVU)	52.0089	20.8961	32.6927	5.74581	15.3539	5.44718	16.5062	3.23084	G	Not in top 8000 most variable DETs	No
Solyc04g074120	Synaptonemal complex protein 1 (SYCP1_ARATH)	40.5442	6.01297	37.624	3.28402	61.1514	3.68007	53.0562	1.72531	G	Not in top 8000 most variable DETs	No
Solyc04g005310	translin-associated factor X (manually curated)	323.32	23.8333	303.28	12.1042	409.168	20.3378	367.921	14.2156	G	Not in top 8000 most variable DETs	No
Solyc07g054210	light dependent NADH:protochlorophyllide oxidoreductase 2 (manually curated)	3797.13	145.071	3350.17	202.756	3049.11	261.633	3776.82	136.408	G	yellow	No
Solyc04g015530	Polygalacturonase A (Q9M6S2_ACTCH)	38.4877	1.51083	64.6388	5.83899	109.365	43.3948	79.9898	23.9019	G	Not in top 8000 most variable DETs	No
Solyc03g119820	Oleosin Bn-V (B6UIA7_MAIZE)	99.1438	4.97455	115.469	9.7784	184.341	36.91	163.909	29.6285	G	Not in top 8000 most variable DETs	No
Solyc09g007150	Glutathione S-transferase (Q76KW1_PEA)	29.2847	0.856083	43.6448	15.9934	58.5264	2.35591	47.8444	5.79457	G	Not in top 8000 most variable DETs	No
Solyc02g089170	Alpha-1 4-glucan-protein synthase (B9RLK7_RICCO)	20.5052	4.02827	25.6719	6.91376	37.9805	6.66404	32.8281	4.61716	G	Not in top 8000 most variable DETs	No
Solyc01g073650	Serine/threonine-protein phosphatase (B9GY91_POPTR)	3354.72	89.0813	3748.25	163.86	4016.02	52.0334	3662.01	72.2867	G	blue	No
Solyc09g011720	Unknown Protein	1508.73	51.3236	1538.69	40.9352	1882.23	27.7567	1677.01	56.3198	G	turquoise	No
Solyc11g066250	Serine carboxypeptidase (Q9XH61_9ASTR)	64.8827	1.41918	51.2513	2.07277	44.1154	2.13596	52.1269	2.81988	G	Not in top 8000 most variable DETs	No
Solyc00g231680	(1-4)-beta-mannan endohydrolase (manually curated)	2625.24	1006.33	5417.27	1828.71	15756.7	7246.34	6186.07	2805.04	G	turquoise	No
Solyc01g090200	Glycyl-tRNA synthetase beta subunit (D2PQC6_KRIFD)	4030.78	168.269	3632.57	344.411	3341.76	65.3769	4106.69	127.461	G	yellow	No
Solyc02g087580	cDNA clone J023121M11 full insert sequence (B7F743_ORYSJ)	49.8395	3.19924	39.5477	4.85595	35.3868	1.54226	36.3472	2.52248	G	Not in top 8000 most variable DETs	No
Solyc11g072030	Non-specific lipid-transfer protein-like protein (C0KHK0_9CARY)	990.368	95.3053	1041.48	83.7707	1331.76	129.127	1036.61	63.8795	G	yellow	No
Solyc02g032940	Aspartic proteinase (Q8L6A8_THECC)	647.125	13.8125	727.394	36.4498	1074.98	251.259	841.974	106.13	G	turquoise	Yes
Solyc01g090690	Elongation factor G (B0SNI8_LEPBP)	2425.42	26.4336	2465.87	36.071	2885.68	114.803	2852.02	117.583	G	turquoise	No
Solyc01g068020	Cyclase/dehydrase (B6T2Z5_MAIZE)	1235.92	53.2867	1072.96	34.6168	1054.36	48.9743	1126.88	10.6621	G	yellow	No
Solyc08g044370	Ulp1 protease family C-terminal catalytic domain containing protein (Q60D46_SOLDE)	7.26591	1.24944	19.8846	6.22992	45.4445	20.5811	46.843	19.6847	G	Not in top 8000 most variable DETs	No
Solyc05g021390	Cytochrome P450	14.9125	3.82042	38.0726	8.8322	42.6869	11.3464	62.2501	22.268	G	Not in top 8000 most variable DETs	No
Solyc08g077450	Electron carrier/ iron ion binding protein (D7KIB9_ARALY)	476.476	25.0078	474.668	6.51803	577.465	26.9331	517.37	14.5999	G	Not in top 8000 most variable DETs	No
Solyc07g052300	R2R3MYB transcription factor 101 (manually curated)	28.3038	5.86902	36.0855	6.59581	152.467	60.8346	57.4519	17.0168	G	Not in top 8000 most variable DETs	No
Solyc04g008070	Cyclin A (P90681_ASTPE)	14.3737	2.16449	16.1483	2.04987	26.3267	2.93879	17.8761	3.04409	G	Not in top 8000 most variable DETs	No
Solyc12g099710	Chromosome 04 contig 1 DNA sequence (Q01AI6_OSTTA)	373.454	10.9345	357.918	22.0805	464.412	29.4387	406.294	12.3827	G	Not in top 8000 most variable DETs	No
Solyc02g092220	Unknown Protein	241.414	3.33994	238.924	10.405	311.491	21.5207	271.767	19.3301	G	Not in top 8000 most variable DETs	No
Solyc08g068700	N-acetyltransferase (B6SUK9_MAIZE)	850.458	78.9251	1184.04	158.83	525.119	90.8512	844.565	128.013	G	pink	No
Solyc01g090760	GATA transcription factor 9 (B6STZ1_MAIZE)	2049.85	213.692	2512.13	281.798	2940.42	277.134	2132.17	95.1862	G	yellow	No
Solyc05g047420	Exosome complex exonuclease RRP45 (C1BLN8_OSMMO)	464.759	8.26187	439.34	32.0896	556.005	8.37815	465.793	14.5434	G	Not in top 8000 most variable DETs	No
Solyc02g080320	Pseudouridine synthase family protein (D7MEP4_ARALY)	141.537	3.29493	122.96	15.0277	214.035	27.2118	184.353	18.1138	G	Not in top 8000 most variable DETs	No
Solyc03g093390	beta expansin precursor 2 (manually curated)	70.8966	13.1743	36.5815	16.7898	23.4322	5.43087	14.9606	3.66336	G	Not in top 8000 most variable DETs	No
Solyc03g059170	Unknown Protein	2793.67	61.4041	2654.04	58.0952	2294.06	130.191	2718.69	43.5863	G	yellow	No
Solyc08g006150	ChaC cation transport regulator-like 1 (A8KBI8_DANRE)	1775.86	272.754	1767.26	177.914	1031.12	155.595	1098.59	140.619	G	turquoise	No
Solyc03g112160	Protein DEHYDRATION-INDUCED 19 homolog 5 (DI195_ORYSJ)	655.803	14.3303	681.919	79.8003	501.288	43.4713	618.461	25.0297	G	blue	No
Solyc07g054460	H/ACA ribonucleoprotein complex non-core subunit NAF1 (NAF1_HUMAN)	338.447	6.87789	341.492	6.21712	412.633	13.9017	358.015	19.9443	G	Not in top 8000 most variable DETs	No
Solyc09g091910	Purple acid phosphatase (A5YBN1_TOBAC)	170.192	17.5254	196.296	18.5964	529.895	168.715	325.857	94.2972	G	turquoise	No
Solyc07g064900	Extracellular ligand-gated ion channel (D7LAY2_ARALY)	1339.72	52.8504	1443.95	89.6853	1109.24	34.4013	1259.96	59.7306	G	turquoise	No
Solyc10g078530	Patatin-like protein 3 (B6TPQ5_MAIZE)	1207.89	55.3745	1142.32	84.5698	972.479	113.291	1148.55	37.8955	G	blue	No
Solyc10g008880	Zinc finger transcription factor 56 (manually curated)	723.082	26.2026	769.122	40.1303	589.015	21.1966	646.468	28.8296	G	turquoise	No
Solyc09g098290	Receptor like kinase, RLK	2411.64	123.221	2312.2	75.0514	2000.02	61.7587	2171.76	41.1087	G	turquoise	No
Solyc02g068400	AT4G20050-like protein (Fragment) (D6PQZ2_9BRAS)	279.52	21.6029	249.874	24.6032	693.145	285.994	355.108	132.784	G	turquoise	No
Solyc09g090150	Legumin 11S-globulin (Q39770_GINBI)	19.0853	1.57625	19.5425	2.4886	41.7976	8.68459	27.8922	10.6281	G	Not in top 8000 most variable DETs	Yes
Solyc03g121420	Phosphatase (D2V497_NAEGR)	301.796	14.3655	335.613	33.9538	482.611	85.1275	350.246	56.9916	G	turquoise	No
Solyc05g052340	Laccase (Q9ZP47_POPTR)	26.8803	3.38236	26.6232	4.25883	11.1833	2.67194	28.7253	10.5449	G	Not in top 8000 most variable DETs	No
Solyc02g065590	Alpha/beta hydrolase fold-3 (C8PY72_9GAMM)	44.5171	4.2935	45.5779	5.18475	67.5156	4.7814	63.0663	3.29868	G	Not in top 8000 most variable DETs	No
Solyc03g116590	Embryo-specific 3 (Q2HUA9_MEDTR)	1713.66	82.0931	1835.91	113.672	2184.53	144.14	2222.38	180.605	G	turquoise	No
Solyc06g074070	Receptor like kinase, RLK	395.603	39.9465	382.152	54.509	280.162	24.5245	383.315	12.4489	G	Not in top 8000 most variable DETs	No
Solyc12g017370	Myb family transcription factor-like (Q6H510_ORYSJ)	238.382	5.87862	218.442	5.38145	185.662	10.1669	209.613	9.46773	G	Not in top 8000 most variable DETs	No
Solyc06g051080	UDP-sugar pyrophosphorylase (USP_ORYSI)	1225.3	53.8028	1034.22	60.7356	1015.64	27.6426	1067.46	29.3141	G	yellow	No
Solyc06g074200	Sex-linked protein 9 (Fragment) (D7RW11_SILCU)	2036.13	146.906	1942.37	85.7035	1240.13	345.39	1228.6	92.7217	G	turquoise	No
Solyc02g091070	Multidrug resistance protein mdtK (MDTK_EDWI9)	665.419	12.2544	634.731	87.1728	887.77	67.6261	756.857	13.7464	G	blue	No
Solyc11g011140	50S ribosomal protein L23 (C0N8Z1_9GAMM)	852.027	8.93882	828.975	16.6732	1043.83	45.134	905.855	21.2427	G	turquoise	No
Solyc05g024160	Pyruvate dehydrogenase E1 component subunit beta (B6T6H3_MAIZE)	85.7136	8.5093	74.1833	4.72183	180.777	43.648	101.631	21.424	G	Not in top 8000 most variable DETs	No
Solyc02g093970	Receptor like kinase, RLK	2702.55	51.2885	2534.71	88.5946	2265.84	71.9683	2472.64	31.7104	G	turquoise	No
Solyc02g084890	Cc-nbs-lrr, resistance protein	197.723	10.9229	195.431	24.7943	147.973	12.1388	144.389	1.63952	G	Not in top 8000 most variable DETs	No
Solyc11g018490	Beta-galactosidase (B9GU11_POPTR)	163.177	4.47013	169.145	12.7237	454.827	139.91	259.858	55.0186	G	turquoise	No
Solyc12g006110	Fasciclin-like arabinogalactan protein 19 (A9XTM4_GOSHI)	292.887	44.9411	368.598	79.6255	465.773	22.3712	331.423	44.2927	G	blue	No
Solyc02g081900	Pentatricopeptide repeat-containing protein (D7KMD0_ARALY)	299.075	10.2885	282.491	27.7418	237.718	13.81	248.62	17.5513	G	Not in top 8000 most variable DETs	No
Solyc10g007600	glycolate oxidase (manually curated)	1922.48	209.211	1913.24	87.5851	1529.91	90.6956	1866.76	127.721	G	grey	No
Solyc12g099650	Photosystem II 5 kDa protein, chloroplastic (PST2_GOSHI)	3675.03	400.751	2767.66	353.854	2302.95	410.685	2660.59	184.09	G	yellow	No
Solyc10g007900	Cytochrome P450	43.24	2.56726	38.7724	4.04924	26.657	3.22679	26.4924	2.94473	G	Not in top 8000 most variable DETs	No
Solyc02g091230	E3 ubiquitin-protein ligase MARCH2 (B5XFT2_SALSA)	27.9499	2.14646	23.6868	3.66643	14.3628	2.11869	20.1485	2.17081	G	Not in top 8000 most variable DETs	No
Solyc11g008110	Genomic DNA chromosome 5 P1 clone MJJ3 (Q9FFK6_ARATH)	477.052	30.3347	539.214	22.6273	580.9	29.4328	571.71	15.2939	G	Not in top 8000 most variable DETs	No
Solyc03g113510	Contig An16c0080 complete genome (A2R766_ASPNC)	26.4779	2.84368	27.4754	5.59572	77.8901	28.7486	60.3775	20.5451	G	Not in top 8000 most variable DETs	No
Solyc02g021640	Phototropic-responsive NPH3 family protein (D7KEU3_ARALY)	1551.64	63.0382	1510.03	36.547	1878.3	90.8124	1729.81	50.3489	G	turquoise	No
Solyc02g081340	Glutathione S-transferase (O24261_PETHY)	168.671	30.9722	85.4565	27.716	74.7205	8.82422	103.983	17.644	G	Not in top 8000 most variable DETs	No
Solyc06g067970	Os07g0419800 protein (Fragment) (Q0D6Y1_ORYSJ)	505.46	8.99977	585.859	16.0382	620.327	39.6767	659.081	15.2778	G	Not in top 8000 most variable DETs	No
Solyc06g063000	Polyadenylate-binding protein (A8N215_COPC7)	2821.89	43.465	3016.79	33.2068	3710.22	215.233	3439.5	143.967	G	purple	No
Solyc02g087910	Non-specific lipid-transfer protein (B9SMA5_RICCO)	27.7165	12.1489	50.9096	18.1902	118.553	41.736	76.0186	21.1381	G	Not in top 8000 most variable DETs	No
Solyc12g098900	Late embryogenesis abundant protein D-29 (LEA29_GOSHI)	7.50426	1.12277	11.4501	1.77069	54.3589	26.2243	17.4357	4.9965	G	Not in top 8000 most variable DETs	No
Solyc06g064650	11-beta-hydroxysteroid dehydrogenase-like (Q9LUF1_ARATH)	13.5604	2.72921	13.1949	2.70295	67.8196	25.5855	32.6349	15.0512	G	Not in top 8000 most variable DETs	No
Solyc06g005620	Zinc transporter (Q9AWG7_MEDTR)	37.1404	4.65102	33.1342	5.57567	20.0617	1.94576	19.4011	3.11246	G	Not in top 8000 most variable DETs	No
Solyc01g110470	GAGA-binding transcriptional activator (A1E2T9_MEDTR)	172.156	3.37454	182.043	8.41689	225.398	3.7896	233.962	11.944	G	Not in top 8000 most variable DETs	No
Solyc01g006210	Non-structural maintenance of chromosomes element 1 homolog (B5X8H0_SALSA)	42.2795	4.28518	31.8777	0.950155	66.7971	4.92184	50.5037	4.19595	G	Not in top 8000 most variable DETs	No
Solyc09g015070	Reductase 1 (Q6TY49_HYDMC)	8.56919	1.96155	6.40706	0.516706	36.4731	12.4416	19.66	7.37186	G	Not in top 8000 most variable DETs	No
Solyc10g074840	Unknown Protein	59.7976	13.208	103.344	25.737	112.867	15.8759	74.6767	8.71823	G	Not in top 8000 most variable DETs	No
Solyc03g119930	Sulfate transporter like protein (Q0WP36_ARATH)	420.059	25.649	461.221	70.9668	296.825	29.3679	387.253	16.0996	G	turquoise	No
Solyc07g008620	EIX receptor 1 (manually curated)	183.413	8.43097	249.26	58.7795	110.507	10.1713	174.922	20.8938	G	Not in top 8000 most variable DETs	No
Solyc10g047030	LEXYL1 (manually curated)	30.854	2.9566	22.4819	3.36667	15.3389	1.72668	14.4784	0.70817	G	Not in top 8000 most variable DETs	No
Solyc04g079040	Serine carboxypeptidase 1 (B6TC80_MAIZE)	25.3014	1.95434	22.9808	2.39191	13.012	2.53406	18.6225	1.04379	G	Not in top 8000 most variable DETs	No
Solyc11g071770	Elongation factor Tu family protein (D7L2H7_ARALY)	546.376	5.4231	625.873	24.6741	672.02	26.6025	715.944	17.9442	G	Not in top 8000 most variable DETs	No
Solyc02g082830	Phosphoserine aminotransferase (B9H657_POPTR)	1703.85	85.4824	1576.44	79.0845	2094.62	116.162	1827.94	16.1659	G	turquoise	No
Solyc06g006110	Calcium/proton exchanger (O59940_NEUCR)	31.8947	9.2588	31.396	5.81018	125.077	43.8433	72.378	23.6469	G	Not in top 8000 most variable DETs	No
Solyc05g046120	Formin 3 (D0QAN4_ARATH)	147.639	10.206	140.802	3.76335	194.809	5.93681	176.312	4.43729	G	Not in top 8000 most variable DETs	No
Solyc03g098480	Unknown Protein	212.09	6.07601	185.534	42.7369	130.376	2.81358	133.11	12.9934	G	Not in top 8000 most variable DETs	No
Solyc01g095570	Mitochondrial carrier-like protein (Q2PYY0_SOLTU)	751.964	22.5185	1001.75	139.065	1094.34	55.332	986.785	31.9656	G	turquoise	No
Solyc07g055440	Cytochrome P450	16.5757	1.18567	27.5139	4.12069	35.967	9.47142	31.4701	2.21219	G	Not in top 8000 most variable DETs	No
Solyc10g051140	Genomic DNA chromosome 5 P1 clone MTE17 (Q9FJ71_ARATH)	179.475	7.79485	217.919	9.89495	225.241	10.8997	249.426	9.61555	G	Not in top 8000 most variable DETs	No
Solyc10g076790	SlLAX4 (manually curated)	205.246	6.82094	198.433	11.8372	263.519	6.59934	209.288	6.99368	G	Not in top 8000 most variable DETs	No
Solyc09g061700	Male sterility 5 family protein (Fragment) (B1Q393_BRAOT)	163.826	45.4894	131.224	16.4731	90.3065	2.24323	134.969	27.7837	G	Not in top 8000 most variable DETs	No
Solyc01g066980	Flowering promoting factor-like 1 (Fragment) (A6MZJ6_ORYSI)	153.844	15.6594	138.607	13.1539	282.295	52.0309	190.153	29.8952	G	Not in top 8000 most variable DETs	No
Solyc12g011020	Had superfamily (Subfamily iiia) phosphatase (B5YDI1_DICT6)	126.034	4.82237	115.236	10.2003	88.055	8.78584	99.392	4.10125	G	Not in top 8000 most variable DETs	No
Solyc01g015020	PRLI-interacting factor A (Fragment) (Q9FUB4_ARATH)	2283.33	121.258	2367.71	42.8966	1913.92	60.3549	2058.11	74.6707	G	turquoise	No
Solyc12g006670	Sel1 domain protein repeat-containing protein (A8TPT4_9PROT)	196.127	6.24403	206.57	6.20734	244.029	5.80312	231.551	8.08614	G	Not in top 8000 most variable DETs	No
Solyc09g059170	Anthocyanidin 3-O-glucosyltransferase (B6SU01_MAIZE)	347.067	55.9927	234.722	42.1733	211.736	17.8921	355.931	64.3613	G	grey	No
Solyc11g012170	Unknown Protein	39.9232	7.11091	18.7483	3.70721	15.1255	1.18763	12.4732	0.571139	G	Not in top 8000 most variable DETs	No
Solyc10g084400	Glutathione S-transferase (Q76KW1_PEA)	1114.31	335.792	726.677	113.108	588.018	89.9442	731.523	65.8979	G	blue	No
Solyc03g032230	CM0216.330.nc protein (B0BLI1_LOTJA)	18.9591	2.97888	32.6069	9.48587	36.7255	4.00198	35.4251	5.10203	G	Not in top 8000 most variable DETs	No
Solyc08g076970	Acetylornithine deacetylase or succinyl-diaminopimelate desuccinylase (D4MFM7_9ENTE)	78.1946	6.61863	70.8548	18.3484	38.5327	8.86769	49.4576	11.4818	G	Not in top 8000 most variable DETs	No
Solyc08g006650	Transmembrane protein 85 (B2W047_PYRTR)	1125.46	25.5836	1154.49	39.4228	1328.77	34.2438	1243.82	44.2311	G	turquoise	No
Solyc08g068590	PAP fibrillin family protein (B5W0K3_SPIMA)	775.286	20.1747	697.36	31.9952	627.859	31.685	703.617	31.8826	G	Not in top 8000 most variable DETs	No
Solyc12g005630	Cytochrome b6-f complex iron-sulfur subunit (A9PEX3_POPTR)	3582.98	225.563	2959.53	349.656	2700.56	179.742	3134.17	210.693	G	yellow	No
Solyc06g075960	Histone H4 (B6T0P4_MAIZE)	3778.13	77.7585	3508.89	126.81	4527.22	237.559	4018.52	184.819	G	turquoise	No
Solyc12g055870	RAG1-activating protein 1 homolog (R1AP1_DICDI)	274.467	8.02709	293.469	12.8385	337.143	15.196	260.462	17.7223	G	Not in top 8000 most variable DETs	No
Solyc01g067860	Peroxidase 24 (B6SRH9_MAIZE)	271.03	45.9818	321.587	13.9529	404.071	57.0424	305.332	28.7821	G	grey	No
Solyc11g007140	Tetracycline resistance protein (A4EIK2_9RHOB)	27.4215	2.23174	27.9201	4.76343	16.2388	1.22835	18.461	4.06871	G	Not in top 8000 most variable DETs	No
Solyc03g120790	Unknown Protein	68.8601	7.6666	50.2287	1.3247	42.9568	5.48643	48.8358	4.33687	G	Not in top 8000 most variable DETs	No
Solyc06g073260	NAD-dependent epimerase/dehydratase (C7QWY4_CYAP0)	4333.88	274.384	3424.27	394.413	3227.55	272.763	3987.1	138.753	G	yellow	No
Solyc10g084880	Avr9/Cf-9 rapidly elicited protein 137 (Q9FQZ2_TOBAC)	62.329	5.94933	57.0644	11.3855	21.7471	4.20829	28.2093	4.24894	G	Not in top 8000 most variable DETs	No
Solyc06g069710	NAC domain protein IPR003441 (B9I557_POPTR)	40.8895	9.88701	54.1999	9.94185	133.316	40.9303	58.282	13.9651	G	Not in top 8000 most variable DETs	No
Solyc06g071430	T17H3.1 protein (Fragment) (Q9SXD0_ARATH)	4621.84	155.798	4169.18	71.9414	3842.59	74.1684	4089.88	123.69	G	turquoise	No
Solyc11g011020	Receptor like kinase, RLK	3068.47	66.5178	3068.88	485.85	3996.17	131.785	3420.44	37.9098	G	blue	No
Solyc10g080480	Zinc finger transcription factor 63 (manually curated)	306.915	8.33357	281.091	13.7553	387.344	28.6068	331.126	12.3331	G	Not in top 8000 most variable DETs	No
Solyc10g080660	Eukaryotic translation initiation factor 4E (A6XJR1_PIG)	1520.63	26.5555	1543.92	18.8779	1816.81	87.5576	1766.48	69.7232	G	purple	No
Solyc09g074530	Nodulin MtN3 family protein (manually curated)	397.892	136.226	473.034	176.639	1335.8	584.041	516.236	195.957	G	turquoise	No
Solyc09g083440	Proteinase inhibitor I (Q53X28_SOLTU)	61.5667	19.3098	16.8504	4.8807	20.2471	5.4868	32.766	8.50802	G	Not in top 8000 most variable DETs	No
Solyc03g034030	Ce-LEA (O16527_CAEEL)	9.49212	2.65082	13.8198	4.41894	57.3	25.0108	39.9546	20.6176	G	Not in top 8000 most variable DETs	No
Solyc02g067570	Paired amphipathic helix protein SIN3 (B3LJ52_YEAS1)	3756.37	56.8281	3711.84	68.4785	4378.15	265.942	4042.72	91.1678	G	turquoise	No
Solyc02g085030	UBA/TS-N domain protein (B8NTJ3_ASPFN)	786.408	45.6472	740.374	24.6988	1012.9	92.4224	814.279	28.6439	G	turquoise	No
Solyc10g079050	BHLH transcription factor (B6TXR4_MAIZE)	169.86	8.23823	163.593	10.3355	234.559	30.5223	164.01	7.56243	G	Not in top 8000 most variable DETs	No
Solyc01g111710	26S proteasome non-ATPase regulatory subunit 3 (B6TBG8_MAIZE)	1969.48	97.2338	2178.81	34.6853	2368.6	107.683	2458.63	84.9333	G	turquoise	No
Solyc09g008610	KIAA0090 homolog (B5X182_SALSA)	3633.8	61.9018	3999.76	139.072	4380.97	235.534	4466.08	47.0683	G	turquoise	No
Solyc12g013990	50S ribosomal protein L1 (B6TB66_MAIZE)	589.354	29.1626	506.533	17.5394	738.183	55.621	631.209	11.8935	G	turquoise	No
Solyc06g074680	Phospholipid diacylglycerol acyltransferase (B3LPN2_YEAS1)	55.292	4.6894	70.4502	7.43686	99.9099	20.4889	103.353	15.1155	G	Not in top 8000 most variable DETs	No
Solyc06g007970	Male sterility 5 family protein (Fragment) (B1Q393_BRAOT)	109.183	51.8582	73.4262	11.3586	41.1968	6.23141	68.0766	10.1067	G	Not in top 8000 most variable DETs	No
Solyc09g009500	Hydrolase alpha/beta fold family protein (D7LIQ3_ARALY)	695.613	34.7069	710.383	24.4738	848.186	22.6151	783.514	27.7683	G	Not in top 8000 most variable DETs	No
Solyc01g093990	Glyoxylate reductase/hydroxypyruvate reductase (GRHPR_HUMAN)	627.381	19.2119	503.29	39.338	515.173	21.6947	582.545	38.9357	G	Not in top 8000 most variable DETs	No
Solyc08g006770	Anthocyanidin synthase (Fragment) (P93120_DIACA)	1322.57	49.7758	1128.98	95.6056	1065.77	60.3179	1251.72	60.4964	G	yellow	No
Solyc01g018020	Transketolase-like protein (Q8LE99_ARATH)	7.92651	2.06298	5.68812	1.06698	66.2196	35.2497	32.052	15.8778	G	Not in top 8000 most variable DETs	No
Solyc11g069580	Cyclic nucleotide gated channel (A9CRE4_MALDO)	427.18	37.2433	446.186	36.0512	566.719	31.4244	482.096	45.3856	G	purple	No
Solyc02g082920	acidic extracellular 26 kD chitinase (manually curated)	106.986	11.1445	125.06	18.8812	53.9507	21.3283	68.7175	10.0751	G	Not in top 8000 most variable DETs	No
Solyc03g115700	SNF1-related protein kinase (manually curated)	1501.03	43.8129	1745.44	22.6269	1798.06	83.4444	1591.45	73.8782	G	grey	No
Solyc02g088200	Activating signal cointegrator 1 complex subunit 1 (C3KHG7_ANOFI)	69.2716	3.12519	73.8927	5.06794	45.7858	4.54562	48.3609	3.82939	G	Not in top 8000 most variable DETs	No
Solyc09g008200	Heavy metal-associated domain containing protein expressed (Q10RN8_ORYSJ)	1594.11	7.98774	1810.25	35.7281	2010.67	189.664	1866.92	188.587	G	grey	No
Solyc04g008100	U-box domain-containing protein (D7MID4_ARALY)	270.624	5.65786	366.332	93.2366	147.751	15.9766	178.68	6.29108	G	blue	No
Solyc04g045480	Ubiquitin thioesterase otubain-like protein (D3TRD1_GLOMM)	1258.19	25.4405	1373.46	45.1794	1501.05	35.4852	1387.97	47.9889	G	yellow	No
Solyc12g013670	Mannan endo-1 4-beta-mannosidase (D2S259_HALTV)	195.449	46.2076	334.373	122.484	1261.34	513.918	461.434	194.548	G	turquoise	No
Solyc04g080000	Peroxisomal membrane protein 11-3 (PX113_ORYSJ)	436.234	40.5882	408.062	7.40229	588.929	50.6088	488.091	33.9433	G	turquoise	No
Solyc01g086710	DNA-directed RNA polymerase (B9SVH7_RICCO)	686.252	19.8611	678.061	21.0758	836.003	55.7762	732.093	21.3222	G	turquoise	No
Solyc06g064520	ob5260-(1-4)-beta-mannan endohydrolase precursor 2 (manually curated)	335.345	91.7673	509.219	160.826	2143.77	942.463	1201.99	538.848	G	turquoise	No
Solyc09g011370	F-box/LRR-repeat protein 14 (FBL14_ARATH)	210.819	16.2675	255.993	11.9782	265.102	8.83777	310.87	11.072	G	Not in top 8000 most variable DETs	No
Solyc08g075300	Protein LSM14 homolog A-B (L14AB_XENLA)	251.374	18.1696	240.235	5.69512	328.329	29.9748	297.997	13.4394	G	Not in top 8000 most variable DETs	No
Solyc04g078760	CONSTANS interacting protein 4 (manually curated)	429.78	11.2908	426.07	9.56339	347.14	10.2402	406.18	8.3506	G	Not in top 8000 most variable DETs	No
Solyc09g082280	Non-specific lipid-transfer protein (Q5MJA5_CAPAN)	226.907	22.2689	138.525	29.4445	113.734	15.7104	176.017	59.728	G	Not in top 8000 most variable DETs	No
Solyc05g054230	Nudix hydrolase 2 (B6U183_MAIZE)	312.275	17.085	314.409	14.1939	250.223	6.02447	268.546	7.28915	G	Not in top 8000 most variable DETs	No
Solyc04g076950	Multidrug resistance protein mdtK (MDTK_PROMH)	187.42	6.81407	202.418	15.4894	145.34	6.74414	190.043	15.6412	G	Not in top 8000 most variable DETs	No
Solyc10g055740	Lysine/histidine transporter (B9GQ40_POPTR)	655.143	79.0932	720.733	91.008	438.601	40.6932	622.764	20.275	G	blue	No
Solyc03g033600	Small nuclear ribonucleoprotein Sm D3 (B6UDW2_MAIZE)	548.656	3.99099	526.656	8.53969	685.547	33.5705	632.92	9.59019	G	Not in top 8000 most variable DETs	No
Solyc04g007290	Os05g0264200 protein (Fragment) (Q0DJL6_ORYSJ)	26.1469	3.35257	32.6962	1.34088	102.393	41.6692	60.8577	19.5358	G	Not in top 8000 most variable DETs	No
Solyc06g067940	Cytochrome c oxidase subunit Vb (Q0KKQ8_PEA)	2579.17	83.9859	2388.84	81.6782	3101.52	148.398	2719.31	36.1747	G	turquoise	No
Solyc05g009310	Zinc finger protein CONSTANS-LIKE 16 (B6TEI1_MAIZE)	850.854	42.1265	473.92	102.763	489.928	103.377	343.586	20.7476	G	turquoise	No
Solyc04g054790	Auxin-regulated protein (Q945F5_SOLLC)	38.3772	0.658001	31.2842	4.95458	62.4523	3.77239	48.2655	1.25472	G	Not in top 8000 most variable DETs	No
Solyc07g006780	Glycerol kinase (GLPK_PYRFU)	1521.26	17.0412	1435.26	25.8745	1263.57	52.0442	1370.04	35.1238	G	yellow	No
Solyc12g041980	Breast cancer type 1 susceptibility protein homolog (BRCA1_PANTR)	759.224	14.8456	730.476	22.1885	613.831	51.6848	629.167	10.9729	G	yellow	No
Solyc10g085580	Nucleolar protein 10 (B6UCL1_MAIZE)	381.484	7.66772	331.194	21.7955	467.548	12.6056	417.062	12.9891	G	Not in top 8000 most variable DETs	No
Solyc07g047610	Transcriptional adapter 2 (B6K677_SCHJY)	459.69	19.9675	472.315	11.8408	567.55	32.1194	549.89	18.4146	G	Not in top 8000 most variable DETs	No
Solyc05g008190	WD repeat protein 46 (B0W308_CULQU)	176.708	9.2767	194.767	12.8904	252.124	27.6855	230.176	2.36091	G	Not in top 8000 most variable DETs	No
Solyc01g009620	Cleavage and polyadenylation specificity factor subunit 5 (C1BVK1_9MAXI)	206.683	17.6887	176.317	7.24724	323.398	37.3859	257.835	26.7039	G	Not in top 8000 most variable DETs	No
Solyc01g007870	Cyclin B-like protein (Q5U8T5_9SOLA)	238.834	7.66831	266.656	20.8928	313.775	21.907	313.897	14.4286	G	Not in top 8000 most variable DETs	No
Solyc10g018120	Unknown Protein	103.955	12.1151	76.102	5.89583	71.575	5.43283	66.1632	6.32938	G	Not in top 8000 most variable DETs	No
Solyc07g065860	Receptor like kinase, RLK	653.383	16.4163	583.437	32.7434	524.592	9.23793	475.44	34.2723	G	Not in top 8000 most variable DETs	No
Solyc05g042120	Unknown Protein	1141.76	15.2123	1068.08	66.2406	933.39	35.888	973.773	31.4799	G	turquoise	No
Solyc03g083100	Calmodulin-binding protein family-like (Q6YXT2_ORYSJ)	828.46	12.4193	704.296	36.4663	619.756	56.9294	782.925	19.976	G	yellow	No
Solyc08g082120	Methanol inducible protein (D1MAX5_NICBE)	18772.2	839.327	16946.9	536.83	14669.2	942.813	16453.2	1004.25	G	yellow	No
Solyc04g054140	Ryanodine receptor (P91905_CAEEL)	1969.71	30.523	2238.06	147.776	2448.3	144.488	2529.58	156.905	G	turquoise	No
Solyc02g062460	2-oxoglutarate-dependent dioxygenase (B9GL08_POPTR)	422.246	25.6638	506.941	18.7767	296.637	43.2508	412.088	28.2322	G	turquoise	No
Solyc04g077150	Erg28 like protein expressed (Q2QLQ4_ORYSJ)	381.154	13.029	423.478	28.0593	498.008	38.8619	456.305	9.46069	G	Not in top 8000 most variable DETs	No
Solyc05g053870	Copine I-like protein (Q6YYC5_ORYSJ)	439.915	32.9093	468.79	13.5227	335.399	15.3023	371.817	17.4885	G	Not in top 8000 most variable DETs	No
Solyc04g009330	Serine/threonine-protein kinase 12 (B6SI45_MAIZE)	165.225	10.9055	159.101	4.88749	221.159	17.1495	211.072	13.922	G	Not in top 8000 most variable DETs	No
Solyc01g110480	BZIP transcription factor family protein expressed (Q8LN44_ORYSJ)	2695.75	82.0127	2667.59	97.5545	2241.16	71.672	2389.82	57.5766	G	turquoise	No
Solyc03g112050	Serine/threonine kinase (C4Q3G8_SCHMA)	4757.98	27.96	5448.09	86.0664	3702.32	125.897	4488.09	102.363	G	blue	No
Solyc10g080760	Hydrolase NUDIX family protein expressed (Q6ATR4_ORYSJ)	184.454	10.067	177.163	9.10289	256.391	6.98463	216.115	4.14784	G	Not in top 8000 most variable DETs	No
Solyc12g049280	NAD-dependent epimerase/dehydratase (Q3MEG2_ANAVT)	380.047	17.0651	313.766	18.2459	292.046	34.411	307.011	7.10284	G	Not in top 8000 most variable DETs	No
Solyc05g007960	Os01g0841200 protein (Fragment) (Q0JHU9_ORYSJ)	2081.61	42.9923	2283.5	120.85	2508.44	138.002	2147.73	81.4981	G	blue	No
Solyc10g080770	NPR1-interactor protein 1 (manually curated)	1028.42	51.382	1137.43	10.2165	823.669	63.1805	956.519	55.8095	G	pink	No
Solyc05g011850	Sulfotransferase family protein (D7KQF7_ARALY)	28.851	2.91795	28.5038	1.98177	11.8273	2.02385	14.8713	2.15094	G	Not in top 8000 most variable DETs	No
Solyc07g032170	Abhydrolase domain-containing protein 5 (B4FAQ7_MAIZE)	3321.18	255.737	3349.52	211.465	2445.97	145.801	2949.29	93.6964	G	turquoise	No
Solyc03g113810	Unknown Protein	10.2674	1.17018	15.895	3.59647	27.8397	4.44437	21.3138	1.93424	G	Not in top 8000 most variable DETs	No
Solyc09g065610	Transmembrane BAX inhibitor motif-containing protein 4 (B6TZF1_MAIZE)	314.55	28.9939	305.827	7.16027	226.063	15.7021	238.01	14.793	G	Not in top 8000 most variable DETs	No
Solyc11g066120	Unknown Protein	52.7204	4.80792	49.0709	4.77554	27.099	1.361	29.5787	2.96572	G	Not in top 8000 most variable DETs	No
Solyc09g030360	Unknown Protein	927.993	60.5391	892.003	29.0757	733.538	32.118	772.56	16.012	G	turquoise	No
Solyc10g084700	30S ribosomal protein S18 family (D7KH00_ARALY)	594.285	11.4782	611.962	20.6033	774.398	34.7998	702.756	36.4331	G	turquoise	No
Solyc01g067080	Genomic DNA chromosome 3 P1 clone MHC9 (Q9LIF6_ARATH)	263.862	14.9463	327.522	15.8322	201.126	13.2002	268.961	10.2201	G	Not in top 8000 most variable DETs	No
Solyc11g069080	Os09g0549700 protein (Fragment) (C7J776_ORYSJ)	602.698	30.5749	581.275	17.6327	483.362	19.6424	485.886	19.9626	G	Not in top 8000 most variable DETs	No
Solyc10g075030	AP2 domain-containing transcription factor (B9HWL7_POPTR)	1107.33	14.0348	1141.8	29.2511	898.504	30.0031	978.181	35.4113	G	turquoise	No
Solyc01g108430	WW domain-binding protein 4 (C1C256_9MAXI)	353.172	14.2527	354.709	11.0003	446.346	15.326	415.408	21.836	G	Not in top 8000 most variable DETs	No
Solyc05g006790	cDNA clone J023121M11 full insert sequence (B7F743_ORYSJ)	32.0984	3.32199	25.1574	1.76907	14.721	2.95841	13.421	3.43777	G	Not in top 8000 most variable DETs	No
Solyc11g012980	Ethylene-responsive transcription factor 9 (ERF80_ARATH)	70.4174	7.43739	58.6759	5.10636	43.31	7.77459	42.3923	8.10224	G	Not in top 8000 most variable DETs	No
Solyc08g081190	plasma membrane intrinsic protein 1.5 (manually curated)	37370.1	1875.6	41193.5	1581.79	45000.8	2218.78	39969.7	2451.05	G	yellow	No
Solyc11g068360	Cc-nbs-lrr, resistance protein	243.429	9.93609	220.384	7.20357	180.277	8.8679	186.678	6.35177	G	Not in top 8000 most variable DETs	No
Solyc02g079640	Serine/threonine-protein kinase receptor (B6U2B7_MAIZE)	164.701	8.39503	177.407	3.22913	113.534	18.9764	136.034	10.981	G	Not in top 8000 most variable DETs	No
Solyc08g077680	Kinase interacting protein 1-like (Q9AS78_ORYSJ)	2091.01	52.2999	2042.6	31.4127	1699.45	60.4459	1963.89	40.3075	G	blue	No
Solyc11g007610	DEAD-box ATP-dependent RNA helicase 5 (RH5_ORYSJ)	339.469	4.80197	353.719	5.71605	434.236	25.7866	403.995	15.3394	G	Not in top 8000 most variable DETs	No
Solyc06g068030	Trafficking protein particle complex subunit 2 (B0XGN5_CULQU)	456.586	16.6356	518.847	21.3758	589.554	11.3847	525.889	22.0976	G	Not in top 8000 most variable DETs	No
Solyc01g087810	Subtilisin-like protease (O82777_SOLLC)	347.953	15.0105	322.813	8.54575	249.546	21.6792	303.604	30.1624	G	Not in top 8000 most variable DETs	No
Solyc07g056390	Endoplasmic oxidoreductin-1 (B6T402_MAIZE)	347.911	6.82248	370.033	8.16616	455.294	39.2242	430.408	20.3108	G	Not in top 8000 most variable DETs	No
Solyc12g096390	Protein C2orf79 homolog (D3PGK2_9MAXI)	586.203	32.3995	692.142	44.187	726.236	48.5213	753.196	9.06972	G	turquoise	No
Solyc02g082610	Unknown Protein	2669.72	171.557	2921.26	175.35	1946.24	232.538	2320.88	49.2553	G	turquoise	No
Solyc09g063140	Os06g0235500 protein (Fragment) (Q0DDB7_ORYSJ)	784.649	26.8322	685.898	66.5558	528.356	50.3931	636.069	32.3067	G	yellow	No
Solyc11g005550	WD-repeat protein (C4PK49_CARPA)	193.557	9.0239	201.816	8.89274	257.919	17.0317	254.784	15.8893	G	Not in top 8000 most variable DETs	No
Solyc11g042420	Cytochrome c (B6SKR4_MAIZE)	88.7452	2.22207	73.2445	6.56015	140.72	7.42283	94.6117	9.00253	G	Not in top 8000 most variable DETs	No
Solyc10g080710	asparaginyl-tRNA synthetase (manually curated)	3485.5	85.4263	3789.08	35.3517	4314.53	127.526	4412.45	96.5274	G	turquoise	No
Solyc08g048190	Unknown Protein	92.398	10.0526	98.6611	10.5249	60.1161	1.70847	71.2786	3.01798	G	Not in top 8000 most variable DETs	No
Solyc09g090400	Translation initiation factor 2B (Q2UBN6_ASPOR)	111.39	4.98902	117.036	3.04047	166.125	15.2421	123.753	9.03912	G	Not in top 8000 most variable DETs	No
Solyc06g005590	Telomere repeat-binding protein 5 (TRP5_ARATH)	394.223	8.34962	362.419	13.427	280.861	12.2879	299.537	20.3126	G	Not in top 8000 most variable DETs	No
Solyc07g052430	Transmembrane protein 97 (TMM97_HUMAN)	409.091	19.557	416.968	31.9056	552.638	38.9175	446.411	50.7057	G	turquoise	No
Solyc05g012000	Universal stress protein family protein (D7KWY1_ARALY)	56.8003	4.74474	42.3549	3.3426	31.9181	2.86314	38.371	4.11978	G	Not in top 8000 most variable DETs	No
Solyc04g082910	Unknown Protein; contains Interpro domain(s) IPR003823 Protein of unknown function CP12	1927.61	48.5881	1781.94	40.7089	1408.48	74.0291	1624.99	44.8686	G	yellow	No
Solyc07g064840	Oral cancer overexpressed protein 1 (B6SJ47_MAIZE)	63.1563	3.85253	81.3702	8.47833	92.2942	6.79339	86.3973	2.39851	G	Not in top 8000 most variable DETs	No
Solyc11g012390	Unknown Protein	71.2576	5.84703	59.2628	5.5927	34.6357	5.53669	41.3964	2.89332	G	Not in top 8000 most variable DETs	No
Solyc12g015920	ATFP4 (B6UDP3_MAIZE)	29.9179	3.10882	52.4944	10.1228	52.2235	1.65406	43.8908	5.12167	G	Not in top 8000 most variable DETs	No
Solyc05g047460	Auxin Response Factor 7B (manually curated)	3953.76	54.1564	4025.59	70.0543	3202.29	198.609	3833.07	215.161	G	blue	No
Solyc09g091830	Peptidoglycan binding domain containing protein (B6SSP4_MAIZE)	424.569	15.9925	315.64	42.9626	263.838	20.7939	311.021	8.72185	G	Not in top 8000 most variable DETs	No
Solyc05g041530	Dienelactone hydrolase domain protein (C3HWX7_BACTU)	1499.09	45.6396	1336.38	104.129	1173.65	95.1813	1326.46	36.6549	G	yellow	No
Solyc01g105380	Unknown Protein	110.808	4.21952	92.6944	6.88414	78.5875	7.39348	103.181	6.96689	G	Not in top 8000 most variable DETs	No
Solyc05g009600	Phosphatase 2A regulatory A subunit (Q9S7C5_ORYSA)	5893.16	265.713	6652.55	193.032	7113.99	250.469	7211.54	58.6584	G	turquoise	No
Solyc04g007420	Genomic DNA chromosome 5 TAC clone K1O13 (Q9FHD6_ARATH)	192.411	9.43536	204.331	4.90527	262.323	9.98442	237.074	8.90161	G	Not in top 8000 most variable DETs	No
Solyc07g065910	Genomic DNA chromosome 5 P1 clone MDA7 (Q9FKU2_ARATH)	73.1316	6.84014	56.4767	5.11446	43.8952	4.6052	44.8439	1.54613	G	Not in top 8000 most variable DETs	No
Solyc08g007240	Hydrolase NUDIX family protein (Q2A9R5_BRAOL)	289.875	12.0247	306.484	13.9777	377.712	38.4606	331.928	14.1182	G	Not in top 8000 most variable DETs	No
Solyc09g083230	F-box family protein (D7L456_ARALY)	715.716	10.7805	757.458	24.589	555.694	39.1966	620.973	29.4512	G	turquoise	No
Solyc06g008520	BET1 (B6U0C6_MAIZE)	697.221	37.4237	783.763	24.1752	861.904	23.9514	782.783	31.9973	G	Not in top 8000 most variable DETs	No
Solyc04g063280	Vacuolar protein sorting-associated protein 27 (B2W9Q9_PYRTR)	2597.4	88.0956	2660.11	7.35313	2146.81	71.4089	2313.65	129.05	G	turquoise	No
Solyc01g107470	Unknown Protein	199.106	11.4555	206.747	2.78241	274.087	31.3004	236.105	10.9586	G	Not in top 8000 most variable DETs	No
Solyc10g007790	Unknown Protein	12.7181	1.65452	15.2365	2.41334	28.3882	1.47402	17.2378	2.36143	G	Not in top 8000 most variable DETs	No
Solyc11g013130	Unknown Protein	1447.86	156.641	1265.72	41.4082	1080.03	57.2074	1108.68	34.8971	G	turquoise	No
Solyc09g008640	Receptor-like protein kinase At3g21340 (RLK6_ARATH)	941.458	19.9136	818.979	47.514	665.434	40.9545	834.744	29.9041	G	yellow	No
Solyc10g086090	Proteinase inhibitor I (Q53X28_SOLTU)	197.374	15.1104	122.041	15.5102	85.1597	22.5328	75.6149	12.8229	G	Not in top 8000 most variable DETs	No
Solyc09g075580	Unknown Protein	154.927	23.6626	136.779	11.5142	95.1427	4.46479	106.553	8.52744	G	Not in top 8000 most variable DETs	No
Solyc01g094990	Glycosyltransferase-like protein (D8RX86_SELML)	109.237	9.33393	73.5718	1.21842	38.1345	2.73415	43.6858	1.78234	G	Not in top 8000 most variable DETs	No
Solyc11g042640	Rieske (2Fe-2S) domain protein (C7QP67_CYAP0)	2043.54	47.7554	1890.82	95.3586	1634.85	122.186	1840.72	34.1634	G	yellow	No
Solyc12g044320	WD-40 repeat family protein (Q1EPE0_MUSAC)	227.327	11.0092	227.269	9.19349	175.188	11.9517	199.418	7.92279	G	Not in top 8000 most variable DETs	No
Solyc11g005030	WD-40 repeat protein (B4AUL0_9CHRO)	2402.19	71.5219	2404.02	107.685	2985.43	140.487	2818.19	106.638	G	turquoise	No
Solyc06g005600	Unknown Protein	217.209	8.34497	234.117	6.38724	310.853	22.4518	273.287	14.6111	G	Not in top 8000 most variable DETs	No
Solyc03g113340	Nodulin-like protein (Fragment) (O81121_ARATH)	132.669	5.33065	161.131	14.1165	178.302	15.9144	145.712	9.75741	G	Not in top 8000 most variable DETs	No
Solyc01g108750	Hydrolase alpha/beta fold family protein (D7LG04_ARALY)	15.1311	2.93544	19.6055	2.4547	31.111	2.59302	21.0416	5.62978	G	Not in top 8000 most variable DETs	No
Solyc05g053020	Thaumatin-like protein (Q9LZL8_ARATH)	17.5078	3.67427	25.5729	3.85546	35.8712	8.28593	24.0662	2.28609	G	Not in top 8000 most variable DETs	No
Solyc12g008760	Protein arginine N-methyltransferase 1 (B6TIG8_MAIZE)	625.438	19.444	576.194	18.5009	804.42	33.8788	668.282	23.1247	G	turquoise	No
Solyc02g062360	Histone-lysine N-methyltransferase NSD3 (NSD3_HUMAN)	825.558	27.7003	788.028	53.6508	625.115	62.5554	807.491	10.7495	G	blue	No
Solyc03g112820	U3 small nucleolar ribonucleoprotein protein MPP10 (B0WQ74_CULQU)	401.672	10.3407	339.932	23.6904	512.29	21.7355	426.03	30.9511	G	Not in top 8000 most variable DETs	No
Solyc10g083350	Soul heme-binding family protein (D7L8V8_ARALY)	241.562	9.18429	208.148	11.174	169.579	13.5253	217.189	11.0846	G	Not in top 8000 most variable DETs	No
Solyc04g015970	ATP-binding cassette 1 (Q80ZB2_RAT)	1612.01	51.0462	1646.28	73.5357	1308.04	92.2219	1428.56	69.7849	G	turquoise	No
Solyc04g016550	Folylpolyglutamate synthase (B9IHV7_POPTR)	2085.72	128.266	1906.98	98.8718	1516.16	168.511	1688	34.1269	G	turquoise	No
Solyc09g074360	RNA binding protein (B6UFA0_MAIZE)	2043.97	38.6235	2146.22	183.507	2464.23	33.1965	2382.16	59.5785	G	blue	No
Solyc09g072650	Calmodulin-binding protein MPCBP (B6U2D5_MAIZE)	610.417	10.9579	633.764	18.6422	480.956	22.2382	575.326	15.2144	G	Not in top 8000 most variable DETs	No
Solyc05g009180	Zinc finger protein 6 (B6T066_MAIZE)	34.8742	2.11375	29.6878	2.20637	18.2426	2.43824	26.2614	2.82173	G	Not in top 8000 most variable DETs	No
Solyc06g011570	Haloacid dehalogenase-like hydrolase-like (Q5JNL2_ORYSJ)	309.19	12.7573	264.733	19.9774	213.73	15.8079	213.402	10.3549	G	Not in top 8000 most variable DETs	No
Solyc09g009100	SolycHsfA3 (manually curated)	1137.92	37.3863	1089.01	66.2388	910.754	62.3527	956.649	27.1695	G	turquoise	No
Solyc02g062030	Cytochrome P450	18.0016	6.20388	17.8424	8.52593	0.870249	0.536479	1.57051	0.444649	G	Not in top 8000 most variable DETs	No
Solyc02g094640	Acetyl-coenzyme A synthetase (Q2RNC6_RHORT)	8519.92	217.901	7890.6	211.439	7006	334.406	8708.61	314.607	G	yellow	No
Solyc09g098330	WD-repeat protein-like (Q8LG28_ARATH)	702.854	4.58019	686.831	38.7802	541.992	19.4753	604.143	13.3529	G	Not in top 8000 most variable DETs	No
Solyc02g089100	C9orf85 homolog (C1BVG8_9MAXI)	494.678	13.3705	459.012	8.54417	637.362	33.3065	552.923	27.9128	G	Not in top 8000 most variable DETs	No
Solyc01g104160	Uncharacterised protein At1g10890 (Y1089_ARATH)	2683.82	107.028	2670.79	91.2721	2167.35	160.078	2248.71	88.887	G	turquoise	No
Solyc11g056280	Unknown Protein	74.4036	7.32034	87.7323	12.772	111.796	5.39107	83.9649	4.31971	G	Not in top 8000 most variable DETs	No
Solyc04g014360	Transcription factor SPATULA (SPT_ARATH)	89.9639	10.7839	64.3676	2.496	59.6066	6.69909	49.5371	3.29117	G	Not in top 8000 most variable DETs	No
Solyc06g068630	F-box domain containing protein expressed (Q2R1T3_ORYSJ)	280.931	12.2331	253.546	3.87062	210.102	14.6294	198.011	9.7797	G	Not in top 8000 most variable DETs	No
Solyc10g024420	ABC transporter C family member 9 (AB9C_ARATH)	46.6897	10.1271	25.0347	0.857608	14.4501	1.98189	15.8999	2.16386	G	Not in top 8000 most variable DETs	No
Solyc04g077160	Unknown Protein	345.482	7.20331	259.466	19.6919	239.538	3.94636	253.147	10.5726	G	Not in top 8000 most variable DETs	No
Solyc06g084220	Unknown Protein	179.215	8.2714	208.504	6.12158	241.523	16.1928	224.615	5.77087	G	Not in top 8000 most variable DETs	No
Solyc10g079420	Calmodulin (B6TKX0_MAIZE)	2612.88	93.0128	2407.22	87.4432	2102.23	85.3798	2568.64	92.3911	G	blue	No
Solyc06g074000	Aspartic proteinase nepenthesin-2 (B6SJT4_MAIZE)	625.174	22.3919	541.961	11.5633	500.796	35.3671	491.612	50.4534	G	Not in top 8000 most variable DETs	No
Solyc08g005530	Unknown Protein	65.6327	3.87257	79.7626	2.91438	95.8014	10.454	103.465	6.87273	G	Not in top 8000 most variable DETs	No
Solyc02g085600	GRAS family transcription factor (B9HET8_POPTR)	965.023	32.0358	871.255	42.2335	765.694	44.8661	771.358	38.0298	G	turquoise	No
Solyc01g100310	Calmodulin-binding protein (D7L4F9_ARALY)	419.549	14.0308	402.723	10.5579	538.649	29.6506	470.122	15.5417	G	Not in top 8000 most variable DETs	No
Solyc12g014130	Calmodulin binding protein (B6TIB2_MAIZE)	64.5731	4.63564	54.9444	4.0425	40.7974	1.37544	44.0439	0.725631	G	Not in top 8000 most variable DETs	No
Solyc01g105550	Hydroxycinnamoyl CoA quinate transferase (D6BK69_CYNSC)	23.0667	2.72828	30.9812	8.60426	54.5493	7.82299	46.4581	4.26	G	Not in top 8000 most variable DETs	No
Solyc01g049890	Unknown Protein	5593.03	265.521	6056.36	167.201	6851.5	263.134	6931.41	164.198	G	turquoise	No
Solyc01g073950	Bromodomain protein (B9N6H8_POPTR)	984.117	34.8495	858.854	33.1809	807.696	31.5374	877.782	40.447	G	turquoise	No
Solyc06g076090	Actin (B5M4V6_TOBAC)	42.0198	3.32709	39.6037	5.37561	23.1131	3.55327	23.5797	5.47248	G	Not in top 8000 most variable DETs	No
Solyc06g083360	DNA-directed RNA Polymerase II subunit L (A3GGI8_PICST)	1068.99	68.0961	1098.46	73.3089	1307.92	63.5126	1141.09	39.6039	G	turquoise	No
Solyc01g099260	Chaperone protein dnaJ (A7J483_9EURY)	253.982	2.49513	255.192	20.2561	180.732	24.8891	218.333	9.05617	G	Not in top 8000 most variable DETs	No
Solyc07g016150	ripening regulated protein DDTFR10 (manually curated)	5154.31	114.908	5520.26	125.774	6467.19	204.344	5947.78	172.577	G	turquoise	No
Solyc10g081960	Unknown Protein	2246.96	69.9325	2050.85	57.7117	1693.42	91.3081	2096.89	55.3612	G	yellow	No
Solyc05g053330	MYB transcription factor (Q39550_CRAPL)	47.1341	4.12479	49.5345	4.47832	26.4476	2.34563	40.0815	3.49166	G	Not in top 8000 most variable DETs	No
Solyc02g090680	Cyclin-dependent kinase inhibitor 7 (KRP7_ARATH)	420.7	16.6847	373.163	7.01945	333.753	25.6661	311.155	24.9365	G	Not in top 8000 most variable DETs	No
Solyc03g044090	Phototropic-responsive NPH3 family protein (D7KEU3_ARALY)	329.382	14.8761	280.107	11.7835	250.07	7.27444	264.435	5.16548	G	Not in top 8000 most variable DETs	No
Solyc08g006630	Spindle and kinetochore-associated protein 2 (SKA2_BOVIN)	28.9208	4.78835	22.9754	2.99343	50.0106	6.92639	34.9019	4.97507	G	Not in top 8000 most variable DETs	No
Solyc01g103110	Unknown Protein; contains Interpro domain(s) IPR007434 Protein of unknown function DUF482	219.794	3.30554	188.391	19.8884	161.457	7.93288	170.673	11.076	G	Not in top 8000 most variable DETs	No
Solyc07g061880	Unknown Protein	8.07422	1.06909	17.796	3.13014	36.4624	4.19185	24.9214	1.83929	G	Not in top 8000 most variable DETs	No
Solyc03g045110	40S ribosomal protein S5 (Q6RH11_CAPAN)	24.7614	4.41902	31.385	5.05947	50.5453	3.55119	42.4867	4.26485	G	Not in top 8000 most variable DETs	No
Solyc11g062410	CBL-interacting protein kinase 18 (C4P7W7_VITVI)	2564.91	35.6498	2650.02	34.4006	2028.73	85.3971	2250.37	57.8703	G	turquoise	No
Solyc10g075060	Non-specific lipid-transfer protein (A7UGG9_SOLTU)	46.9076	7.89708	48.2587	8.44803	110.292	22.98	83.0881	13.6197	G	Not in top 8000 most variable DETs	No
Solyc12g094480	Unknown Protein	128.871	4.20341	129.571	3.63895	175.239	6.23047	143.728	12.9174	G	Not in top 8000 most variable DETs	No
Solyc11g069990	Nbs-lrr, resistance protein	377.947	7.50602	386.386	9.02172	275.547	27.5799	330.855	18.5889	G	Not in top 8000 most variable DETs	No
Solyc05g015060	26S protease regulatory subunit 6B homolog (PRS6B_YEAST)	35.2982	10.7446	29.8552	1.6507	10.8302	2.43631	13.6135	0.414513	G	Not in top 8000 most variable DETs	No
Solyc09g042750	Acyl-CoA thioesterase 9 (Q503Q9_DANRE)	1324.12	33.2853	1243.48	14.0894	1075.51	25.5529	1162.63	15.705	G	purple	No
Solyc07g064260	F-box family protein (D7LTH7_ARALY)	48.3851	4.9801	73.9027	2.75918	74.1642	5.64326	52.6764	6.8267	G	Not in top 8000 most variable DETs	No
Solyc07g056500	glutathione S-transferase T5 (manually curated)	339.578	25.7041	304.347	22.9725	188.666	23.948	228.036	31.3098	G	Not in top 8000 most variable DETs	No
Solyc08g078900	Cortical cell-delineating protein (B6U436_MAIZE)	234.467	24.8884	262.111	8.79515	377.035	29.8345	284.5	33.797	G	Not in top 8000 most variable DETs	No
Solyc11g073200	Legumin 11S-globulin (Q39770_GINBI)	177.868	4.52517	245.714	18.8205	237.703	7.22458	289.782	17.4426	G	Not in top 8000 most variable DETs	No
Solyc07g053020	Cc-nbs-lrr, resistance protein	365.415	3.91173	327.823	18.8301	278.105	15.8067	311.196	5.09971	G	Not in top 8000 most variable DETs	No
Solyc03g121060	auxin-regulated IAA14 (manually curated)	628.519	22.5245	595.651	20.3584	489.952	23.0026	507.874	17.7263	G	Not in top 8000 most variable DETs	No
Solyc07g052610	Cyclin (D8UD80_VOLCA)	124.681	9.77836	111.619	16.7752	80.3968	11.758	104.547	3.846	G	Not in top 8000 most variable DETs	No
Solyc03g115660	Cell division protein kinase 12 (CDK12_HUMAN)	581.879	5.26138	570.521	23.2032	438.234	7.23996	516.971	16.9993	G	Not in top 8000 most variable DETs	No
Solyc02g088940	CTP synthase like protein (Q0WRY1_ARATH)	991.019	16.3995	941.196	29.7257	653.966	24.4439	787.708	48.795	G	turquoise	No
Solyc03g112070	Phosphoglycerate dehydrogenase (D2D316_GOSHI)	1927.97	42.442	1981.52	24.3239	2351.86	114.696	2343.5	113.641	G	turquoise	No
Solyc06g062890	Unknown Protein	2159.22	87.902	1994.7	62.5564	1568.56	123.703	1867.4	47.5524	G	turquoise	No
Solyc12g089150	Syntaxin-like protein (B0E004_LACBS)	539.404	10.7423	586.163	15.5579	673.511	16.1221	628.19	10.7604	G	Not in top 8000 most variable DETs	No
Solyc06g075550	Serine/threonine kinase (Q32SF8_HORVD)	525.632	3.83855	552.779	28.9886	411.898	30.1796	514.924	38.3899	G	Not in top 8000 most variable DETs	No
Solyc02g069980	PHD and RING finger domain-containing protein 1 (PHRF1_HUMAN)	390.914	21.3106	445.509	18.5029	511.399	35.5391	530.576	22.0646	G	Not in top 8000 most variable DETs	No
Solyc12g096400	Genomic DNA chromosome 5 P1 clone MXM12 (Q9SDA2_ARATH)	64.3941	4.74357	85.514	14.9369	102.243	8.53975	89.7811	5.964	G	Not in top 8000 most variable DETs	No
Solyc12g015640	Mitochondrial transcription termination factor (Fragment) (C6FB12_PSEMZ)	603.777	11.4725	580.527	41.461	449.382	11.1289	517.226	23.9817	G	Not in top 8000 most variable DETs	No
Solyc10g044520	Ferredoxin I (Q93XJ9_SOLTU)	19869.9	636.971	17938.8	543.991	15880.3	1536.17	18403.7	154.145	G	yellow	No
Solyc07g008750	Nuclear nucleic acid-binding protein C1D (C1D_XENLA)	450.274	16.3575	476.145	14.5165	558.089	15.3752	516.186	12.8908	G	Not in top 8000 most variable DETs	No
Solyc02g093370	Sucrose cleavage protein-like (Q9LT55_ARATH)	2066.22	32.7584	2215.14	67.7323	2572.31	66.0235	2664.95	111.783	G	turquoise	No
Solyc07g056020	Translation initiation factor IF-2 (A5B2X2_VITVI)	7796.86	257.269	7027.59	353.653	6245.9	115.729	7642.4	341.465	G	blue	No
Solyc10g055250	Cold shock protein-1 (Q8LPA7_WHEAT)	19.5986	2.25698	16.9729	1.00985	45.3416	5.5111	25.417	1.89598	G	Not in top 8000 most variable DETs	Yes
Solyc02g092440	Mitochondrial porin (Voltage-dependent anion channel) outer membrane protein (C4R1Z2_PICPG)	3156.57	42.9772	3175.92	113.864	3862.8	182.435	3799.31	132.749	G	turquoise	No
Solyc06g005400	Unknown Protein	119.268	10.0189	96.1203	7.71182	82.7545	8.52122	119.107	10.5113	G	Not in top 8000 most variable DETs	No
Solyc04g007150	Alpha-glucosidase (Q9LEC9_SOLTU)	268.847	9.04321	237.491	25.9757	189.865	13.9363	188.379	5.18752	G	Not in top 8000 most variable DETs	No
Solyc10g086760	Tubulin beta chain (B9HP96_POPTR)	2753.95	120.283	2672.04	144.362	3477.19	157.65	3174.15	130.59	G	turquoise	No
Solyc05g007200	RNA recognition motif containing protein (B6T581_MAIZE)	360.734	21.9734	391.07	20.6289	463.791	31.0847	418.966	25.1005	G	Not in top 8000 most variable DETs	No
Solyc06g065100	R2R3MYB transcription factor 3 (manually curated)	887.659	41.2281	795.12	22.8753	683.415	24.6295	620.475	28.4561	G	turquoise	No
Solyc01g109570	Glucan endo-1 3-beta-glucosidase 7 (B6T289_MAIZE)	1970.81	35.7908	2068.71	7.86625	1629.61	34.1294	1932.05	90.9309	G	blue	No
Solyc03g007310	Abscisic acid receptor PYL8 (PYL8_ARATH)	1144.96	42.2977	1201.37	28.2974	1405.89	42.6112	1420.3	29.4672	G	turquoise	No
Solyc01g088740	Casein kinase II subunit beta-4 (B6TGH2_MAIZE)	521.182	5.74474	535.194	22.3612	652.034	14.3416	586.217	12.0473	G	Not in top 8000 most variable DETs	No
Solyc01g100860	ADP-ribosylation factor (D7KT27_ARALY)	11107.6	545.969	13010.5	581.275	14628.9	422.105	14011.5	304.195	G	turquoise	No
Solyc08g075240	Glucose-methanol-choline oxidoreductase (D6TF66_9CHLR)	178.753	16.0366	156.642	10.7266	128.196	6.26243	134.891	6.07797	G	Not in top 8000 most variable DETs	No
Solyc11g011210	Gibberellin regulated protein (A2Q374_MEDTR)	413.231	21.0796	519.99	69.0541	713.787	105.121	540.783	55.8715	G	yellow	No
Solyc01g009820	Hydroxyproline-rich glycoprotein family protein (D7LGA9_ARALY)	771.736	25.516	815.703	41.8243	607.382	31.7623	685.352	49.4977	G	turquoise	No
Solyc07g008400	Pto-like, Serine/threonine kinase protein, resistance protein	36.6283	6.8639	34.3712	5.51565	73.2394	3.02995	52.1335	3.17753	G	Not in top 8000 most variable DETs	No
Solyc10g039400	Unknown Protein	195.483	19.517	139.684	18.2967	120.137	11.0875	151.927	5.29495	G	Not in top 8000 most variable DETs	No
Solyc04g081890	Ring H2 finger protein (D9ZHD8_HYPPE)	538.189	42.9276	526.152	28.3109	425.6	17.8869	444.777	14.4091	G	Not in top 8000 most variable DETs	No
Solyc12g089310	Tubulin beta-1 chain (D7KT68_ARALY)	46.4921	1.53048	37.347	6.40062	74.0395	6.68812	55.5715	6.3602	G	Not in top 8000 most variable DETs	No
Solyc06g054530	MRNA complete cds clone RAFL24-13-K22 (Q67YQ9_ARATH)	1108.37	40.1733	1250.7	124.414	1366.81	48.1431	1285.02	25.8491	G	turquoise	No
Solyc03g078030	Unknown Protein	437.132	24.5338	387.146	23.6012	294.282	18.7094	311.012	12.0933	G	Not in top 8000 most variable DETs	No
Solyc07g049350	ob489-ethylene response factor 2 AY275554 (manually curated)	1362.91	29.8904	1393.21	26.8447	1071.81	58.2305	1173.59	32.5124	G	turquoise	No
Solyc06g082210	Light-dependent short hypocotyls 1 (D7M6V0_ARALY)	417.096	10.2856	422.073	34.6853	294.488	21.8869	367.793	30.2977	G	Not in top 8000 most variable DETs	No
Solyc12g006370	Amine oxidase family protein (Q1EPI3_MUSAC)	686.413	33.3996	781.191	10.8779	535.013	18.2592	672.651	20.8483	G	blue	No
Solyc09g082950	C2 domain-containing protein-like (Q8W0F9_ORYSJ)	1198.46	67.5443	1160.87	60.1695	907.855	29.6973	1076.3	62.8915	G	turquoise	No
Solyc02g082770	Phosphatidylinositide phosphatase SAC1 (D0NSZ0_PHYIN)	459.354	20.5664	438.209	12.4403	356.355	34.6954	383.208	25.0005	G	Not in top 8000 most variable DETs	No
Solyc10g074580	Aminoacylase ACY1 and related metalloexopeptidases (ISS) (Q00SR9_OSTTA)	2046.46	54.4024	1918.25	52.3312	1556.25	41.0538	1747.05	70.295	G	blue	No
Solyc08g081830	Os04g0625000 protein (Fragment) (Q0J9Y7_ORYSJ)	454.039	20.645	448.174	19.8034	351.558	11.8247	385.695	13.5953	G	Not in top 8000 most variable DETs	No
Solyc12g008590	Profilin (D6BRE6_9ROSI)	10496.9	342.499	11994.8	899.844	12948.3	510.4	11057	603.097	G	yellow	No
Solyc04g082630	Glyceraldehyde-3-phosphate dehydrogenase B (B4F8L7_MAIZE)	3000.38	165.249	2577.71	200.613	2390.44	98.0805	2541.04	83.5548	G	yellow	No
Solyc12g036650	Unknown Protein	321.578	4.19703	317.986	10.7072	426.142	39.7723	326.851	8.66383	G	Not in top 8000 most variable DETs	No
Solyc09g010850	ATP binding / serine-threonine kinase (C5DB71_VITVI)	552.546	25.8686	643.296	78.4184	324.793	10.3427	453.853	38.2503	G	blue	No
Solyc01g007280	30S ribosomal protein S4 chloroplastic (B5MF80_PETIN)	195868	11148.8	176785	9010.3	140394	14323.9	173940	3230.27	G	yellow	No
Solyc11g066070	Unknown Protein	323.235	13.4918	319.491	12.8038	421.718	19.0564	380.294	5.00445	G	Not in top 8000 most variable DETs	No
Solyc05g051030	ER-derived vesicles protein ERV14 (B6T6Y8_MAIZE)	497.724	32.9229	565.186	24.5594	622.587	24.8738	548.86	25.8677	G	Not in top 8000 most variable DETs	No
Solyc04g079640	Cytochrome P450	338.235	16.334	288.293	12.7787	249.562	14.6086	252.89	19.1279	G	Not in top 8000 most variable DETs	No
Solyc03g097460	Integrator complex subunit 9 (B0WES8_CULQU)	1189.39	41.5061	1186.49	46.5915	918.964	91.373	973.676	39.3571	G	turquoise	No
Solyc06g062940	RING-box protein (Q2PYP4_ARAHY)	714.218	42.1437	777.541	22.4448	1048.76	65.9342	915.035	30.0313	G	turquoise	No
Solyc12g015860	ob4457-LeFPS1 (manually curated)	1571.88	65.0217	1622.06	97.1189	1944.96	131.99	1737.19	66.1279	G	turquoise	No
Solyc06g069460	TCP transcription factor 6 (manually curated)	60.1596	4.38831	56.413	7.58031	32.3866	6.07525	44.1109	4.46963	G	Not in top 8000 most variable DETs	No
Solyc09g091700	Alcohol dehydrogenase zinc-containing (B4RDK4_PHEZH)	33.279	5.31591	28.9595	3.15719	61.389	5.22327	41.7413	4.89436	G	Not in top 8000 most variable DETs	No
Solyc08g062700	Peptidyl prolyl cis trans isomerase-like (Q5ZB85_ORYSJ)	550.283	12.1284	583.221	20.1612	691.027	38.9486	682.579	18.1593	G	Not in top 8000 most variable DETs	No
Solyc07g008340	Zinc import ATP-binding protein ZnuC (ZNUC_RICCN)	4424.07	95.6961	4488.49	97.5553	5400.06	238.175	5184.32	85.8682	G	turquoise	No
Solyc08g016760	Unknown Protein	82.374	13.3906	59.4286	4.2906	51.2952	4.86987	67.3016	6.53084	G	Not in top 8000 most variable DETs	No
Solyc09g082870	Calcium-transporting ATPase 1 (Q7XBH9_CERRI)	79.8184	7.89962	55.1532	13.8311	25.4484	4.56558	40.5836	4.3062	G	Not in top 8000 most variable DETs	No
Solyc08g059760	Peroxidase 40 (PER40_ARATH)	1045.57	39.6976	938.357	35.3777	798.423	49.7846	848.89	25.7299	G	turquoise	No
Solyc10g008390	Thioredoxin (A7LNX7_9CARY)	153.209	3.02134	171.495	12.1823	215.744	21.4711	183.808	9.80768	G	Not in top 8000 most variable DETs	No
Solyc08g080680	Elicitor-responsive protein 3 (B6U4Y1_MAIZE)	980.973	27.5154	988.182	49.6943	1293.45	70.4104	1078.35	43.286	G	turquoise	No
Solyc03g071580	Gag-pol polyprotein (Fragment) (Q850I3_VITVI)	187.037	4.97855	195.002	18.8915	309.515	33.248	259.884	19.4103	G	Not in top 8000 most variable DETs	No
Solyc01g109420	Flavoprotein wrbA (B6SPB2_MAIZE)	137.684	7.33788	188.542	15.7631	201.017	13.6161	229.829	14.3684	G	Not in top 8000 most variable DETs	No
Solyc06g071560	Serine/threonine protein phosphatase 2A 55 kDa regulatory subunit B beta isoform (2ABB_ARATH)	339.006	12.0758	312.723	12.5915	250.102	32.7476	248.292	20.5815	G	Not in top 8000 most variable DETs	No
Solyc04g014490	Erwinia induced protein 2 (Q84XG6_SOLTU)	2158.29	61.4062	2264.21	71.934	2740.8	131.178	2596.5	69.7292	G	turquoise	No
Solyc03g059190	(+)-neomenthol dehydrogenase (SDR1_ARATH)	57.3706	2.56027	59.7224	5.46738	94.962	10.4982	81.5764	5.56734	G	Not in top 8000 most variable DETs	No
Solyc01g106810	Unknown Protein	145.908	9.55363	141.41	4.75341	196.596	9.03562	173.559	14.4497	G	Not in top 8000 most variable DETs	No
Solyc01g108030	Methylcrotonoyl-CoA carboxylase beta subunit (D4XQJ0_ACIHA)	1157.4	24.8126	1372.35	47.2332	1537.68	66.7211	1583.83	102.056	G	turquoise	No
Solyc02g089460	Unknown Protein	51.3588	6.56095	41.0719	4.1477	23.6284	0.687167	40.7312	6.02665	G	Not in top 8000 most variable DETs	No
Solyc02g085760	Rhomboid family protein (D7MJX8_ARALY)	178.77	13.7814	146.949	12.7569	90.1896	19.9787	96.8737	13.2757	G	Not in top 8000 most variable DETs	No
Solyc02g069670	Alpha-glucosidase 1 (O22444_ARATH)	381.056	23.3749	312.504	16.188	301.418	7.47895	340.35	28.9669	G	Not in top 8000 most variable DETs	No
Solyc02g078470	Unknown Protein	618.826	16.6304	589.951	22.5453	483.471	20.84	584.168	15.8817	G	Not in top 8000 most variable DETs	No
Solyc01g108020	Thioredoxin m (B9HS17_POPTR)	343.027	12.6751	387.28	27.5468	444.929	21.9331	444.738	31.4594	G	Not in top 8000 most variable DETs	No
Solyc07g008330	Nucleolar and coiled-body phosphoprotein 1-like (B8JIY2_DANRE)	688.434	11.0534	648.755	25.682	855.646	49.9633	749.749	4.57012	G	turquoise	No
Solyc03g033370	PreY mitochondrial (B5XAT2_SALSA)	54.6371	4.33283	61.72	7.33682	87.2983	5.60607	65.2874	5.63739	G	Not in top 8000 most variable DETs	No
Solyc11g010210	SKIP interacting protein 3 (Fragment) (B8Q889_ORYSI)	139.53	13.4928	153.538	3.41311	99.154	6.39017	142.741	15.7125	G	Not in top 8000 most variable DETs	No
Solyc01g109220	Mitochondrial import receptor subunit TOM6 homolog (TOM6_ARATH)	594.05	23.2792	560.197	26.5472	796.65	59.9627	636.032	41.1731	G	turquoise	No
Solyc02g062140	Armadillo/beta-catenin repeat family protein (D7MDH4_ARALY)	158.305	4.83086	156.31	14.2288	115.136	12.6126	123.697	13.634	G	Not in top 8000 most variable DETs	No
Solyc06g018110	RNA binding protein (B6TYA4_MAIZE)	136.312	9.75336	111.471	8.71725	188.461	8.11286	140.895	9.11088	G	Not in top 8000 most variable DETs	No
Solyc10g047290	Serine/threonine phosphatase family protein (C1E0J1_9CHLO)	867.887	17.5306	808.886	16.6089	706.429	12.6353	746.934	24.9824	G	Not in top 8000 most variable DETs	No
Solyc10g080940	Tubulin beta chain (B9HNJ2_POPTR)	13115.6	713.353	14861.3	720.548	16021.6	750.686	14798.4	429.973	G	turquoise	No
Solyc01g100280	RNA helicase DEAH-box4 (manually curated)	185.317	12.5949	170.763	7.01397	252.774	24.6232	210.359	15.0671	G	Not in top 8000 most variable DETs	No
Solyc05g052300	Amino acid transporter (B9HYI5_POPTR)	105.411	13.7406	118.843	11.1465	67.0402	7.09677	98.0583	6.19204	G	Not in top 8000 most variable DETs	No
Solyc02g091710	von Willebrand factor type A domain-containing protein (D2VKS7_NAEGR)	77.8681	4.19038	74.6594	9.33203	50.2779	1.42623	53.5983	2.80563	G	Not in top 8000 most variable DETs	No
Solyc06g083170	Transcription factor (D6MKM4_9ASPA)	93.1632	3.20553	71.7941	6.36885	61.7591	3.50121	72.8002	4.73354	G	Not in top 8000 most variable DETs	No
Solyc06g072030	Unknown Protein	1938.41	62.5886	2071.04	28.6132	2608.37	137.798	2163.89	105.506	G	turquoise	No
Solyc06g066520	Avr9/Cf-9 rapidly elicited protein 146 (Q9FQZ6_TOBAC)	61.8367	5.07084	54.465	6.07814	24.5256	1.14271	42.6221	2.67332	G	Not in top 8000 most variable DETs	No
Solyc08g008230	Arabinogalactan peptide 22 (AGP22_ARATH)	807.453	30.6893	886.293	55.5242	1006.69	38.6528	835.105	49.4163	G	turquoise	No
Solyc01g111400	Subtilisin-like protease (A9XG40_TOBAC)	1837.28	14.0642	2064.43	25.3518	1483.75	49.1981	1765.76	40.5446	G	blue	No
Solyc02g070870	Mitochondrial inner membrane protease subunit 1 (B6T7U7_MAIZE)	276.746	9.93326	292.88	11.6001	378.543	9.27033	355.972	16.459	G	Not in top 8000 most variable DETs	No
Solyc01g010030	Receptor-like protein kinase At3g21340 (RLK6_ARATH)	561.056	44.1428	471.399	11.6224	399.906	15.4132	394.932	20.5262	G	turquoise	No
Solyc06g060740	Zinc finger family protein (D7LRS3_ARALY)	211.873	2.08966	239.278	12.9784	283.472	10.8112	239.887	7.37084	G	Not in top 8000 most variable DETs	No
Solyc01g100630	Catalase (Q25B80_FESAR)	620.031	40.451	673.516	19.3751	437.017	50.3693	482.684	23.0964	G	turquoise	No
Solyc09g063070	Senescence-associated protein-like (ISS) (Q00X72_OSTTA)	1361.89	21.998	1316.73	26.4264	1114.46	79.35	1097.75	68.3085	G	turquoise	No
Solyc03g026040	Receptor like kinase, RLK	273.222	19.4893	259.504	15.3171	210.035	10.1132	239.033	16.0204	G	Not in top 8000 most variable DETs	No
Solyc09g015710	Unknown Protein	27.0777	1.70541	29.3825	2.78051	48.8997	5.73051	42.1109	5.70916	G	Not in top 8000 most variable DETs	No
Solyc01g102520	MLO-like protein 1 (Q94CG7_MAIZE)	218.12	4.79866	194.934	5.64907	155.339	8.68222	146.953	8.87548	G	Not in top 8000 most variable DETs	No
Solyc02g083410	Receptor-like kinase (A7VM40_MARPO)	1032.11	38.923	969.302	27.0759	802.431	87.4604	848.648	34.2713	G	turquoise	No
Solyc02g065420	UPF0497 membrane protein At3g50810 (U497K_ARATH)	193.243	11.4259	201.767	7.64222	125.172	10.5878	153.211	10.5366	G	Not in top 8000 most variable DETs	No
Solyc02g089690	Leaf senescence protein-like (Q8RV74_ORYSJ)	340.855	8.82358	290.883	29.8336	265.089	6.91244	347.283	11.4772	G	Not in top 8000 most variable DETs	No
Solyc11g066300	CRS2-associated factor 2, chloroplastic (CAF2P_ARATH)	1140.08	28.5828	964.792	87.2624	906.036	37.1175	1108.89	47.9137	G	yellow	No
Solyc03g114670	Unknown Protein	205.921	6.13594	203.739	12.6426	286.137	9.87298	243.173	14.3632	G	Not in top 8000 most variable DETs	No
Solyc10g006670	Cysteine-rich receptor-like protein kinase 10 (CRK10_ARATH)	210.831	28.9793	227.524	31.4651	125.09	24.4285	137.865	5.04622	G	Not in top 8000 most variable DETs	No
Solyc08g014550	Ribosomal L9-like protein (B3TLR1_ELAGV)	825.074	31.3192	747.129	23.0888	1069.25	90.498	934.003	68.596	G	pink	No
Solyc12g055830	Inorganic pyrophosphatase (D1MVT0_BRARC)	1728.51	41.3456	1853.04	82.366	2115.32	121.285	2012.28	55.4188	G	turquoise	No
Solyc04g078060	Small hydrophobic protein (Q9ZQY8_ARATH)	196.939	10.206	243.739	14.8804	285.61	28.8121	226.969	10.2298	G	Not in top 8000 most variable DETs	No
Solyc03g044300	APETALA2a (manually curated)	381.531	18.1477	407.581	33.6005	286.508	20.8077	358.555	6.95057	G	Not in top 8000 most variable DETs	No
Solyc08g080430	Cytochrome P450	167.941	12.761	140.165	5.65327	109.742	3.10596	117.672	8.72029	G	Not in top 8000 most variable DETs	No
Solyc09g014790	Class E vacuolar protein-sorting machinery protein hse1 (HSE1_EMENI)	2901.13	189.693	2930.98	69.3719	2306.65	103.343	2556	137.514	G	turquoise	No
Solyc05g047540	Pentatricopeptide repeat protein (Q287V2_9BRAS)	369.808	19.3024	358.957	14.2413	269.117	13.6059	323.664	7.7866	G	Not in top 8000 most variable DETs	No
Solyc01g007860	Ubiquitin-conjugating enzyme family protein-like (Q3HVN0_SOLTU)	4889.59	102.567	5000.86	24.8337	5975.15	275.486	5765.78	166.891	G	turquoise	No
Solyc02g089490	Unknown Protein	972.599	54.8482	1001.41	50.1356	517.11	57.2189	645.357	58.5403	G	turquoise	No
Solyc09g010370	Ras-related protein Rab-8A (C1C123_9MAXI)	2894.53	67.7693	3219.43	151.617	3499.96	131.852	3520.33	101.794	G	turquoise	No
Solyc02g084680	Short internodes 2 (B9MXK1_POPTR)	60.1468	7.84335	52.8557	3.23675	37.931	3.49965	42.1866	2.85524	G	Not in top 8000 most variable DETs	No
Solyc04g076400	Vernalization insensitive 3 (Fragment) (C4PFF9_BRARC)	526.926	15.2165	457.656	30.4792	408.027	10.7931	434.667	20.1975	G	Not in top 8000 most variable DETs	No
Solyc01g080700	Inosine-uridine preferring nucleoside hydrolase family protein (D7LYI5_ARALY)	401.323	4.63538	359.992	32.6124	299.81	26.5099	295.627	10.0877	G	Not in top 8000 most variable DETs	No
Solyc01g094760	Origin recognition complex 5 subunit (Q6EWX0_ARATH)	184.874	2.86913	175.523	10.3306	256.28	24.0337	207.766	17.1235	G	Not in top 8000 most variable DETs	No
Solyc08g081390	Phosphoglycerate mutase family protein (C1DZH2_9CHLO)	64.7436	4.40003	37.9021	3.6117	23.8362	6.18671	28.5121	3.48321	G	Not in top 8000 most variable DETs	No
Solyc09g091950	Ethylene-responsive transcription factor 1 (ERF1_ORYSJ)	55.7768	10.1882	64.9684	5.19903	30.4051	1.45826	42.0098	6.68388	G	Not in top 8000 most variable DETs	No
Solyc02g078220	Unknown Protein	753.947	14.621	802.204	21.8489	609.423	39.666	688.896	11.9151	G	turquoise	No
Solyc03g119420	Anamorsin homolog (DRE2_VITVI)	532.194	38.3856	562.485	20.9523	694.573	21.9358	658.59	17.3816	G	turquoise	No
Solyc07g066670	Ent-kaurene synthase (B9HI37_POPTR)	762.517	10.9374	736.342	29.3053	600.125	23.6547	625.611	35.9855	G	turquoise	No
Solyc01g073690	V-type ATP synthase subunit D (B0WRC9_CULQU)	2444.54	66.1476	2380.14	64.2202	3021.79	156.624	2843.42	154.825	G	turquoise	No
Solyc10g018350	Vesicle-associated membrane protein-associated protein (Q1ANA7_WHEAT)	319.034	7.21602	314.065	13.9139	429.974	30.1805	386.122	13.9521	G	Not in top 8000 most variable DETs	No
Solyc07g005060	DCN1-like protein 4 (B6TI85_MAIZE)	431.959	22.7955	486.618	17.101	542.845	28.5081	531.09	26.306	G	Not in top 8000 most variable DETs	No
Solyc03g113670	AT3g47831/T23J7 (Q94F43_ARATH)	115.06	3.44063	111.754	7.49189	162.86	9.36868	132.471	7.85494	G	Not in top 8000 most variable DETs	No
Solyc02g032870	5&apos;-tyrosyl-DNA phosphodiesterase (TDP2_BOVIN)	191.394	8.33363	169.604	11.926	255.266	18.1654	213.536	16.8014	G	Not in top 8000 most variable DETs	No
Solyc02g081570	Yellow stripe-like protein 2.1 (Fragment) (B4ZYE4_BRAJU)	42.3089	5.03693	47.0467	5.89742	65.7196	4.10417	68.5169	6.61395	G	Not in top 8000 most variable DETs	No
Solyc06g082590	DNA-binding protein Pti6 (manually curated)	2667.28	51.0372	2635.72	180.853	2120.4	48.3846	2535.96	59.4486	G	blue	No
Solyc11g071810	fasciated (manually curated)	225.954	17.3755	183.935	15.9934	146.346	12.8908	160.88	4.43246	G	Not in top 8000 most variable DETs	No
Solyc08g005060	SnRK1-interacting protein 1 (Q9LEH5_HORVU)	151.461	14.5069	134.709	9.25429	208.431	12.2675	175.126	7.48981	G	Not in top 8000 most variable DETs	No
Solyc01g104050	Receptor-like kinase (A7VM41_MARPO)	536.834	10.0284	568.215	37.4332	390.239	16.2971	386.067	19.5902	G	blue	No
Solyc01g091180	Peptide transporter-like protein (Q9SVS9_ARATH)	72.1537	3.35391	57.838	1.52677	46.1379	2.58656	45.953	5.67654	G	Not in top 8000 most variable DETs	No
Solyc07g054490	Secretory carrier membrane protein (B3TLU6_ELAGV)	1507.36	71.5763	1554.26	106.105	1832.26	70.0037	1625.83	78.5436	G	turquoise	No
Solyc08g078890	At2g10940-like protein (Fragment) (B3SKI0_ARAHA)	19.1688	2.81029	13.9642	1.94522	108.795	23.4068	44.858	20.0319	G	Not in top 8000 most variable DETs	No
Solyc01g099110	Xaa-pro aminopeptidase (A1DF27_NEOFI)	1907.45	38.2106	1696.63	72.2407	1462.36	55.2488	1680.69	45.1155	G	blue	No
Solyc11g069320	Kelch repeat-containing F-box family protein (D7MTV4_ARALY)	1196.48	10.1715	1235.04	84.3673	1613.77	66.8851	1407.14	35.8876	G	blue	No
Solyc09g010030	50S ribosomal protein L12-2 (B6SHT7_MAIZE)	734.575	4.99554	746.318	30.7649	920.915	42.2436	841.466	19.133	G	turquoise	No
Solyc11g044510	Unknown Protein	1785.23	79.0127	1466.43	77.1792	1164.71	44.1142	1285.73	30.9162	G	greenyellow	No
Solyc02g071950	Unknown Protein	141.775	19.8513	106.943	7.36064	65.9019	13.7988	67.4778	16.1096	G	Not in top 8000 most variable DETs	No
Solyc08g075020	Pectinacetylesterase like protein (Fragment) (Q56WP8_ARATH)	140.688	4.82169	130.997	11.6063	98.9595	5.03144	100.215	7.36016	G	Not in top 8000 most variable DETs	No
Solyc01g079770	TLC domain-containing protein 2 (TLCD2_DANRE)	326.155	13.4381	312.578	25.4248	240.263	18.4971	265.211	8.09689	G	Not in top 8000 most variable DETs	No
Solyc11g073280	RNA binding protein (C1N7F4_MICPS)	1921.56	42.6623	2023.89	53.3534	2415.87	76.0944	2316.07	67.1244	G	purple	No
Solyc06g071140	EARLY FLOWERING 5 (Q6QTF1_ARATH)	2286.99	170.815	1932.05	61.7729	1846.57	13.6313	2032.76	105.04	G	turquoise	No
Solyc09g064810	Uncharacterized membrane protein C24H6.13 (YA7D_SCHPO)	26.242	1.54014	26.6207	2.67921	51.7507	7.70506	34.9877	4.27915	G	Not in top 8000 most variable DETs	No
Solyc04g079550	Signal peptidase I (B4W1T4_9CYAN)	5614.62	114.363	5692.71	149.461	4643.87	132.451	4801.12	109.13	G	turquoise	No
Solyc10g006540	Formin 3 (D0QAN4_ARATH)	1617.01	59.6685	1569.56	46.5036	1327.75	64.1582	1436.14	16.9527	G	turquoise	No
Solyc01g006070	Plant viral-response family protein (B6SQA7_MAIZE)	34.9862	5.35921	33.0958	3.63192	17.094	6.31152	17.7963	2.79092	G	Not in top 8000 most variable DETs	No
Solyc12g013580	Peptidyl-prolyl cis-trans isomerase cyclophilin-type (A8INE5_CHLRE)	1439.63	31.5296	1232.21	53.5072	1092.28	24.6353	1253.41	40.1491	G	blue	No
Solyc09g005630	Os03g0291800 protein (Fragment) (Q0DSS4_ORYSJ)	96.0696	9.45	107.722	19.9017	150.514	15.9565	105.373	6.30268	G	Not in top 8000 most variable DETs	No
Solyc02g087200	U-box domain-containing protein 40 (PUB40_ARATH)	798.183	42.7619	747.862	21.8256	615.33	17.1266	604.154	25.0183	G	turquoise	No
Solyc08g016400	Unknown Protein	320.26	14.2263	358.69	13.9657	243.074	21.6905	292.239	25.6776	G	Not in top 8000 most variable DETs	No
Solyc01g005010	Protein XRI1 (XRI1_ARATH)	161.511	5.94381	127.01	15.7307	111.501	7.04514	101.12	3.76587	G	Not in top 8000 most variable DETs	No
Solyc07g054820	Protein thf1 (A0YRG1_LYNSP)	4579.16	51.1055	3911	188.976	3782.3	114.108	4090.79	155.402	G	yellow	No
Solyc03g120930	Avr9/Cf-9 rapidly elicited protein 146 (Q9FQZ6_TOBAC)	111.615	2.94894	115.831	9.23089	73.8977	6.86347	94.2191	3.68514	G	Not in top 8000 most variable DETs	No
Solyc06g073990	Unknown Protein	115.928	7.46092	86.8431	8.80263	68.1755	7.31943	71.6188	4.08329	G	Not in top 8000 most variable DETs	No
Solyc12g010860	tft8 (manually curated)	1845.96	70.6583	1760.19	74.4339	2247.67	115.149	2047.43	90.8543	G	turquoise	No
Solyc09g009720	Ubiquitin-conjugating enzyme 13 E2 (D8QMV8_SELML)	401.238	10.6675	394.013	11.1884	556.843	46.3927	491.042	16.2395	G	turquoise	No
Solyc05g054510	Dof zinc finger protein (Q9M4G1_SOLTU)	28.8973	4.86746	24.8639	6.35338	14.598	1.1424	21.3558	2.67596	G	Not in top 8000 most variable DETs	No
Solyc07g006640	ADP-ribosylation factor 3 (B4FM64_MAIZE)	1594.07	57.2056	1645.81	37.2371	1929.64	73.0373	1861.67	26.847	G	turquoise	No
Solyc09g072970	U6 snRNA-associated Sm-like protein LSm2 (B9EPQ0_SALSA)	312.788	12.6347	300.194	9.43819	404.698	16.599	373.144	11.9544	G	Not in top 8000 most variable DETs	No
Solyc09g091100	Coenzyme F420 hydrogenase/dehydrogenase beta subunit-like (Q118A1_TRIEI)	1709.01	54.6646	1705.17	55.5762	1320.13	139.2	1445.39	31.1024	G	turquoise	No
Solyc09g065870	Copine I-like (Q5JMT9_ORYSJ)	858.089	13.3398	820.776	58.4453	683.712	23.6092	728.896	48.6025	G	turquoise	No
Solyc06g082630	26S protease regulatory subunit 6B (B6TRH7_MAIZE)	1989.11	97.7971	2136.61	41.2994	2703.71	111.859	2656.19	111.667	G	turquoise	No
Solyc10g079710	Uncharacterized plant-specific domain 01589 (A2Q300_MEDTR)	230.977	8.27362	274.122	12.6936	299.96	6.61025	279.174	8.06854	G	Not in top 8000 most variable DETs	No
Solyc08g007630	Cc-nbs-lrr, resistance protein	625.668	9.38412	513.724	10.5291	450.609	16.4621	501.368	22.0981	G	Not in top 8000 most variable DETs	No
Solyc11g061720	Kinase family protein (D7KZX1_ARALY)	265.34	30.8423	235.387	8.11228	199.659	15.1461	190.102	4.65263	G	Not in top 8000 most variable DETs	No
Solyc02g092980	cyclin D3.1 (manually curated)	702.565	49.7713	693.283	20.8343	899.584	64.5859	797.368	69.1837	G	turquoise	No
Solyc07g041230	Protein Brevis radix-like 4 (BRXL4_ARATH)	195.735	5.41735	184.438	10.609	141.835	7.71697	134.661	5.61187	G	Not in top 8000 most variable DETs	No
Solyc11g040150	Heparan-alpha-glucosaminide N-acetyltransferase (D2QUR2_SPILD)	1028.24	25.4723	1022.19	40.1609	831.77	30.1237	922.982	18.4042	G	blue	No
Solyc04g078160	Genomic DNA chromosome 5 P1 clone MKD15 (Q9FMY0_ARATH)	156.304	8.48964	173.131	5.80751	214.66	3.3888	212.366	8.35317	G	Not in top 8000 most variable DETs	No
Solyc04g080450	Fatty acid elongase 3-ketoacyl-CoA synthase (Q6DUV5_BRANA)	1159.53	39.0102	1342.08	55.1334	1477.77	63.3564	1428.99	56.1974	G	turquoise	No
Solyc02g092870	Os12g0236050 protein (Fragment) (C7J9Q6_ORYSJ)	524.658	10.743	588.317	10.6536	681.292	51.5722	667.329	21.1095	G	turquoise	No
Solyc02g022890	Fatty acid hydroxylase family protein expressed (Q9AY73_ORYSJ)	558.397	7.86026	490.726	20.9591	337.994	42.4238	405.324	30.7798	G	yellow	No
Solyc03g117940	U2 small nuclear ribonucleoprotein A&apos (Q1HPT8_BOMMO)	955.72	24.5425	979.459	21.8508	1239.51	60.7675	1059.25	47.4224	G	turquoise	No
Solyc11g044900	Poly(A) RNA polymerase protein 1 (TRF5_ASHGO)	523.354	7.43207	514.397	3.20376	655.757	25.7188	601.268	12.4154	G	Not in top 8000 most variable DETs	No
Solyc02g086250	Genomic DNA chromosome 3 P1 clone MAL21 (Q9LJZ4_ARATH)	113.482	1.19582	107.659	3.83535	166.896	20.6801	150.972	8.31431	G	Not in top 8000 most variable DETs	No
Solyc09g005180	FAD-binding domain-containing protein (D7LF85_ARALY)	83.0182	8.86992	61.8728	1.87924	55.7627	6.6338	41.8561	3.77776	G	Not in top 8000 most variable DETs	No
Solyc06g074490	Unknown Protein	3299.55	235.418	3513.55	155.141	4704.66	221.358	4268.08	264.385	G	turquoise	No
Solyc00g011890	Galactokinase like protein (O23461_ARATH)	2416.79	50.8285	2464.36	130.356	2964.32	208.054	2891.4	28.7032	G	turquoise	No
Solyc01g103180	Protein FAR1-RELATED SEQUENCE 11 (FRS11_ARATH)	353.468	13.3749	426.813	17.7166	451.596	7.58856	462.956	11.2341	G	Not in top 8000 most variable DETs	No
Solyc01g073960	ENT domain containing protein (B6THJ4_MAIZE)	1271.04	72.729	1253.19	23.7859	1042.01	27.7639	1025.53	48.958	G	turquoise	No
Solyc04g064680	Exostosin family protein (D7KK15_ARALY)	1230.76	26.4411	1179.58	17.116	1003.25	14.8863	1100.88	11.5076	G	turquoise	No
Solyc04g071180	Genomic DNA chromosome 3 P1 clone MGD8 (Q9LUU1_ARATH)	432.824	12.044	393.197	6.26315	554.799	44.026	479.054	17.178	G	Not in top 8000 most variable DETs	No
Solyc08g081690	NADPH oxidase (manually curated)	421.534	27.3512	421.647	19.6252	317.458	15.2018	387.074	9.76712	G	Not in top 8000 most variable DETs	No
Solyc03g118050	Unknown Protein	1.93966	1.64297	2.31406	1.0126	58.6018	24.7163	40.0951	23.2873	G	Not in top 8000 most variable DETs	No
Solyc01g056600	Ribonuclease 3 (RNC_THEFY)	449.674	24.634	407.418	15.961	354.463	9.09529	358.631	6.91186	G	Not in top 8000 most variable DETs	No
Solyc07g049430	GDSL esterase/lipase At2g42990 (GDL48_ARATH)	165.145	9.93989	145.249	1.40526	107.196	5.84905	115.236	10.0253	G	Not in top 8000 most variable DETs	No
Solyc03g098070	C2H2L domain class transcription factor (D9ZIU3_MALDO)	292.286	15.3402	307.282	8.31381	216.033	10.3902	268.279	12.3782	G	Not in top 8000 most variable DETs	No
Solyc10g039230	Unknown Protein	135.932	8.68049	116.76	5.50204	94.8214	5.35106	113.659	6.26023	G	Not in top 8000 most variable DETs	No
Solyc09g010700	CM0545.320.nc protein (B0BLB0_LOTJA)	59.5338	5.16502	35.77	3.16403	26.1918	3.98574	27.1633	5.10717	G	Not in top 8000 most variable DETs	No
Solyc11g068670	Nicalin (B4FZF8_MAIZE)	1675.69	25.1234	1727.13	82.6056	2150.87	104.04	2037.51	90.7134	G	turquoise	No
Solyc01g099770	meloidogyne-induced giant cell protein DB141 (manually curated)	57927.3	2007.48	60979.5	1635.72	72259.7	3660.61	71883.2	899.147	G	turquoise	No
Solyc03g019870	Cytochrome P450	79.1066	2.74792	92.8272	10.1717	119.964	6.79458	89.5075	7.72232	G	Not in top 8000 most variable DETs	No
Solyc07g063430	Mpv17 protein (B0WWR6_CULQU)	3185.84	98.8107	3245.72	31.9809	2603.3	166.004	3026.02	98.6071	G	turquoise	No
Solyc02g067260	RING finger protein 6 (RNF6_HUMAN)	1599.07	100.048	1589.32	84.3747	1266.77	107	1342.79	43.7947	G	turquoise	No
Solyc10g079330	UDP-glucosyltransferase HvUGT5876 (D3WYW1_HORVD)	1.91921	0.949518	9.6736	4.97454	40.1015	5.292	21.749	4.27444	G	Not in top 8000 most variable DETs	No
Solyc01g008760	Genomic DNA chromosome 5 P1 clone MUB3 (Q9FLF2_ARATH)	97.0548	8.21104	111.314	5.38073	137.494	6.23002	129.348	4.03519	G	Not in top 8000 most variable DETs	No
Solyc10g079930	UDP-glucosyltransferase HvUGT5876 (D3WYW1_HORVD)	2148.29	180.826	1897.12	117.911	1590.83	76.0092	1667.39	40.0938	G	turquoise	No
Solyc01g094960	mitogen-activated protein kinase 5 (manually curated)	459.993	8.58078	522.277	27.0942	360.274	10.3953	451.423	14.9356	G	Not in top 8000 most variable DETs	No
Solyc01g079410	SMP-30/Gluconolaconase/LRE domain protein (D2QD53_SPILD)	346.941	6.37534	362.884	8.05725	446.305	19.3237	401.499	12.654	G	Not in top 8000 most variable DETs	No
Solyc05g005980	Solute carrier family 15 member 4 (S15A4_XENLA)	111.046	6.2452	118.7	17.4493	167.9	15.9839	167.896	17.4938	G	Not in top 8000 most variable DETs	No
Solyc02g086270	Receptor-like kinase (A7VM25_MARPO)	456.375	9.86415	485.91	17.0358	363.248	12.0728	425.89	37.4113	G	Not in top 8000 most variable DETs	No
Solyc04g015600	Receptor like kinase, RLK	451.328	17.4747	453.309	31.7133	349.198	15.9203	385.147	16.5496	G	Not in top 8000 most variable DETs	No
Solyc08g023510	Unknown Protein	93.9643	10.191	132.017	23.6278	48.4209	9.16004	83.8654	12.5768	G	Not in top 8000 most variable DETs	No
Solyc04g005640	S-like ribonuclease (Q9FQL6_PRUDU)	22.4143	1.83812	44.7201	7.45602	55.6999	8.44693	37.6676	9.49204	G	Not in top 8000 most variable DETs	No
Solyc11g067340	Acyltransferase (Fragment) (C1JZ69_DATST)	90.2951	7.41389	115.776	18.0414	136.725	7.3478	97.9968	8.74928	G	Not in top 8000 most variable DETs	No
Solyc01g080510	Os05g0406000 protein (Fragment) (Q0DI98_ORYSJ)	1156.82	14.0068	1126.03	53.2658	941.852	76.1742	1049.49	18.0344	G	yellow	No
Solyc11g005800	Chromatin assembly factor 1 subunit B (B4FIA4_MAIZE)	211.761	8.41531	210.394	9.43599	305.802	21.5556	259.911	13.8967	G	Not in top 8000 most variable DETs	No
Solyc12g098680	Eukaryotic translation initiation factor 3 subunit 3 (B6SHE0_MAIZE)	2219.05	83.8407	2344.35	57.2925	2722.29	28.7304	2729.3	56.2201	G	turquoise	No
Solyc02g062650	Laccase (Q9AUI0_PINTA)	641.983	48.2562	528.542	50.9373	405.487	67.3494	501.248	8.12044	G	blue	No
Solyc10g079190	Zinc finger transcription factor 61 (manually curated)	1566.66	53.5543	1695.62	85.6443	1957.6	86.3418	2009.96	88.4581	G	turquoise	No
Solyc06g053930	Calmodulin (Q39890_SOYBN)	56.089	5.38524	63.1795	3.40198	33.5314	5.1263	53.8162	5.65446	G	Not in top 8000 most variable DETs	No
Solyc12g015740	Transmembrane emp24 domain-containing protein 3 (B6TE63_MAIZE)	496.609	13.8445	522.671	32.8672	708.727	32.1912	568.124	34.8667	G	turquoise	No
Solyc08g076140	Phosphomevalonate kinase (Q944G1_HEVBR)	404.382	15.6872	449.382	19.4288	556.074	30.7382	551.46	13.9925	G	Not in top 8000 most variable DETs	No
Solyc08g080920	Phosphopantothenoylcysteine decarboxylase (B4FCR1_MAIZE)	363.905	17.2286	381.255	13.8643	463.388	11.2905	400.381	6.07153	G	Not in top 8000 most variable DETs	No
Solyc10g044840	PIN domain containing protein (Yacp-like protein) (C7TLS1_LACRL)	712.707	25.2401	744.189	24.3992	558.588	30.225	608.98	11.893	G	turquoise	No
Solyc10g081720	Fasciclin-like arabinogalactan protein 14 (A9XTL9_GOSHI)	4477.18	147.098	4239.35	51.3622	3651.02	114.726	3938.96	73.463	G	turquoise	No
Solyc11g008020	Ras-related protein Rab-18 (B6TSE5_MAIZE)	115.116	1.33661	102.232	3.79308	156.402	17.3412	126.694	9.61647	G	Not in top 8000 most variable DETs	No
Solyc12g088520	Cyclin A-like protein (Q40492_TOBAC)	363.981	5.67158	376.831	17.3102	613.349	40.9797	513.079	51.692	G	turquoise	No
Solyc01g101140	LOC100005105 protein (Fragment) (A4QNR9_DANRE)	3027.04	36.2989	3205.17	56.9962	2511.72	122.763	2897.57	78.2648	G	turquoise	No
Solyc05g008430	pH-response regulator protein palA/RIM20 (C5FER8_NANOT)	1534.4	104.373	1497.07	31.4896	1261.19	22.1069	1496.18	64.7722	G	turquoise	No
Solyc04g008850	Aspartic proteinase nepenthesin-1 (C0JA97_9ORYZ)	200.339	10.5559	156.954	12.0013	143.936	3.61391	137.395	2.27074	G	Not in top 8000 most variable DETs	No
Solyc01g111800	Amino acid permease (Fragment) (B8C3S3_THAPS)	138.766	3.90747	135.295	12.0884	93.4032	11.3658	98.6493	2.51427	G	Not in top 8000 most variable DETs	No
Solyc02g090460	Unknown Protein	159.982	9.55932	135.572	4.64038	98.8713	9.74656	115.249	9.76575	G	Not in top 8000 most variable DETs	No
Solyc02g090130	Vacuolar protein sorting-associated protein vps13 (C5FUC9_NANOT)	2150.01	22.6348	2231.28	76.277	1670.7	151.563	1975.89	86.9489	G	turquoise	No
Solyc06g083590	ABI3 (manually curated)	3.46653	0.499494	2.65326	1.04623	52.2898	11.9527	12.5503	5.29896	G	Not in top 8000 most variable DETs	No
Solyc04g081360	tRNA (Adenine-N(1)-)-methyltransferase non-catalytic subunit trm6 (C5JJB9_AJEDS)	319.007	3.91199	296.894	6.30093	409.5	13.0865	330.037	7.50783	G	Not in top 8000 most variable DETs	No
Solyc10g086700	Zinc finger family protein (Fragment) (D7M766_ARALY)	154.184	4.01538	120.125	8.02807	110.516	7.14201	111.499	1.81286	G	Not in top 8000 most variable DETs	No
Solyc02g022920	ethylene-responsive nuclear protein (manually curated)	217.104	6.15816	211.25	11.3837	162.046	5.19329	177.024	6.24673	G	Not in top 8000 most variable DETs	No
Solyc02g023950	Receptor like kinase, RLK	599.73	23.7199	661.433	36.0374	472.389	27.6903	580.493	7.47393	G	blue	No
Solyc06g068780	Protein kish-A (KISHA_CHICK)	614.731	14.6549	714.416	6.98327	842.661	34.3991	676.702	22.19	G	turquoise	No
Solyc08g062770	Methyltransferase-like protein 6 (B5X6R8_SALSA)	249.161	5.50629	250.481	10.8713	330.095	14.8672	302.636	19.0836	G	Not in top 8000 most variable DETs	No
Solyc08g007810	Unknown Protein	48.4805	3.74599	32.0998	6.43674	27.1071	2.58933	26.1082	1.39425	G	Not in top 8000 most variable DETs	No
Solyc12g096810	LETM1 and EF-hand domain-containing protein 1, mitochondrial (LETM1_CHICK)	108.9	2.41543	121.947	7.38251	157.033	8.29073	132.647	7.63526	G	Not in top 8000 most variable DETs	No
Solyc00g049520	Unknown Protein	251.429	8.3261	250.22	12.866	350.582	37.0366	276.793	16.9013	G	Not in top 8000 most variable DETs	No
Solyc03g044630	Conserved domain protein (B4WN95_9SYNE)	56.3091	4.42868	40.9101	3.70347	32.8912	5.98792	33.6915	4.84789	G	Not in top 8000 most variable DETs	No
Solyc12g098410	Glucan endo-1 3-beta-glucosidase 4 (B6T2U4_MAIZE)	85.4209	4.90441	72.9756	1.35261	51.7817	5.20818	50.6295	2.79334	G	Not in top 8000 most variable DETs	No
Solyc01g104460	Partner of Y14 and mago (WIBG_CULQU)	304.829	18.7802	315.471	15.1674	401.19	23.391	370.724	3.16381	G	Not in top 8000 most variable DETs	No
Solyc09g075080	Phytochrome A-associated F-box protein (EID1_ARATH)	512.687	19.7934	611.566	56.1844	397.762	20.3897	497.239	18.3599	G	blue	No
Solyc03g115670	Formin 2B (C7BGM9_PHYPA)	3444.62	212.441	3288.83	155.807	2767.76	63.4855	3187.55	116.525	G	turquoise	No
Solyc03g098340	Unknown Protein	316.481	5.35422	337.099	7.93751	418.843	28.9513	404.503	11.8461	G	Not in top 8000 most variable DETs	No
Solyc12g042500	Gibberellin-regulated family protein (D7MT35_ARALY)	115.996	9.80639	100.952	7.21747	74.8875	15.7289	82.4853	3.38831	G	Not in top 8000 most variable DETs	No
Solyc09g091270	Genomic DNA chromosome 5 P1 clone MAC12 (Q9FFY5_ARATH)	131.027	9.4742	117.689	4.6753	72.3812	6.9102	92.9201	6.87565	G	Not in top 8000 most variable DETs	No
Solyc04g016510	Guanine nucleotide-binding protein subunit beta-4 (GBB4_HUMAN)	1170.67	32.4419	1249.48	20.6991	1431.43	45.9797	1480.74	35.0645	G	turquoise	No
Solyc03g078570	Ras-related protein Rab-6A (B6STE7_MAIZE)	3720.58	133.966	3390.9	131.263	2846.75	249.322	2878.62	117.056	G	turquoise	No
Solyc08g067340	WRKY transcription factor 46 (manually curated)	50.9119	19.0804	53.4822	18.0776	6.56772	2.89146	18.5768	7.2362	G	Not in top 8000 most variable DETs	No
Solyc12g088790	BHLH transcription factor-like (Q8S0N2_ORYSJ)	1313.87	90.303	1083.17	47.5753	938.134	98.2136	864.95	50.9078	G	turquoise	No
Solyc03g114460	Acetyl-coenzyme A synthetase (D5HA95_SALRM)	1573.73	15.2046	1422.03	17.0072	1248.15	36.9095	1434.15	26.09	G	turquoise	No
Solyc01g080300	Cobalt transport protein (Q4C386_CROWT)	1564.97	41.9256	1496.35	46.8041	1269.23	51.8806	1364.79	38.3675	G	turquoise	No
Solyc10g007260	Ubiquitin-conjugating enzyme E2 N (B5XC59_SALSA)	1371.41	30.4829	1407.61	32.2751	1709.73	80.8048	1655.21	38.5118	G	turquoise	No
Solyc05g006640	Phospholipid-transporting ATPase (C1GDL1_PARBD)	900.799	20.4534	964.859	17.8851	719.441	57.2241	854.878	16.6359	G	blue	No
Solyc06g051820	Myosin (D2UY43_NAEGR)	153.565	7.15315	141.572	10.6413	106.587	3.78905	127.85	10.8063	G	Not in top 8000 most variable DETs	No
Solyc02g065580	Cytochrome b561 (Q3LGX4_CITLA)	580.795	18.3545	594.087	14.8703	741.717	38.7493	668.701	23.2579	G	Not in top 8000 most variable DETs	No
Solyc12g056850	Co-chaperone protein DnaJ (A7I1Z6_CAMHC)	128.831	9.51282	111.018	8.37533	91.1181	8.29341	106.593	6.95519	G	Not in top 8000 most variable DETs	No
Solyc06g048850	Protein-methionine-s-oxide reductase (D7L9H5_ARALY)	74.8421	6.53395	80.3509	7.43714	126.923	21.2023	121.291	18.6123	G	Not in top 8000 most variable DETs	No
Solyc06g034120	Alcohol dehydrogenase zinc-binding domain protein (A6X535_OCHA4)	1039.03	44.6214	1098.73	32.7576	1281.87	48.8263	1291.18	30.8236	G	turquoise	No
Solyc04g026300	Unknown Protein	263.068	34.432	226.472	15.5684	158.883	6.93584	188.884	7.83423	G	Not in top 8000 most variable DETs	No
Solyc03g114820	Universal stress protein family protein (D7KWY1_ARALY)	32.4031	6.23784	38.9966	5.51363	56.0024	4.83033	44.794	1.86492	G	Not in top 8000 most variable DETs	No
Solyc06g066330	Poly polymerase catalytic domain containing protein expressed (Q336N3_ORYSJ)	706.025	33.58	738.872	42.3141	525.185	29.0313	604.33	24.5331	G	turquoise	No
Solyc12g056990	Unknown Protein	89.1904	2.81786	88.443	1.85413	58.823	5.64742	66.9193	5.06647	G	Not in top 8000 most variable DETs	No
Solyc02g083450	Aspartic proteinase-like protein 1 (ASPL1_ARATH)	431.54	19.8568	387.803	10.3083	332.092	11.6015	322.508	12.0986	G	Not in top 8000 most variable DETs	No
Solyc03g059250	Serine/threonine kinase (C4QNN2_SCHMA)	652.02	8.77124	625.887	30.2711	516.322	24.9006	543.222	11.8555	G	Not in top 8000 most variable DETs	No
Solyc06g066160	Pinoresinol-lariciresinol reductase (Q4R0I0_9ROSI)	270.952	3.1153	250.701	8.66513	176.271	36.2326	188.007	18.3122	G	Not in top 8000 most variable DETs	No
Solyc07g008770	Unknown Protein	931.043	37.9879	1003.57	37.092	1176.1	63.771	1190.43	37.2442	G	turquoise	No
Solyc10g055520	GTP-binding RHO-like protein (CRL1_CANAL)	317.505	7.952	310.366	12.7846	235.484	23.9745	259.677	12.1591	G	Not in top 8000 most variable DETs	No
Solyc10g045550	Ras-related protein Rab-25 (RAB25_BOVIN)	431.744	19.62	450.907	28.1701	563.008	37.6115	496.28	31.7076	G	Not in top 8000 most variable DETs	No
Solyc02g055440	Genomic DNA chromosome 3 P1 clone MPN9 (Q9LT28_ARATH)	1582.56	25.4018	1465.41	58.8665	1181.43	143.273	1368.71	56.2115	G	yellow	No
Solyc05g008620	DNA replication complex GINS protein psf3 (C5FUE7_NANOT)	50.1006	8.08469	49.9852	0.579343	84.5831	11.7668	73.4167	7.7854	G	Not in top 8000 most variable DETs	No
Solyc10g080880	SlPIN7 (manually curated)	205.863	10.2187	197.8	14.301	152.104	3.71864	151.276	5.31433	G	Not in top 8000 most variable DETs	No
Solyc00g044350	EPIDERMAL PATTERNING FACTOR-like protein 1 (EPFL1_ARATH)	67.1027	3.37473	58.3203	6.14097	41.5069	5.46092	44.1884	3.16278	G	Not in top 8000 most variable DETs	No
Solyc01g079300	Stachyose synthase (Q8RW08_9LAMI)	89.6172	8.35951	89.5891	5.21625	60.9473	5.6272	79.1981	1.91287	G	Not in top 8000 most variable DETs	No
Solyc00g110870	Receptor like kinase, RLK	449.94	10.5972	429.05	15.1878	344.073	25.8778	383.587	26.3597	G	Not in top 8000 most variable DETs	No
Solyc06g074800	Cys2/His2 zinc-finger transcription factor (Q4U318_SILLA)	203.012	8.39692	210.656	12.1926	260.991	9.57764	191.289	9.12284	G	Not in top 8000 most variable DETs	No
Solyc11g005140	Pentatricopeptide repeat protein (A0JBX0_ORYSJ)	709.5	8.12524	674.723	16.6833	917.822	57.7517	795.762	17.8856	G	turquoise	No
Solyc09g010980	Unknown Protein	92.9065	8.18409	112.754	26.2081	40.8419	4.00196	56.1186	0.995895	G	Not in top 8000 most variable DETs	No
Solyc06g054150	Unknown Protein	48.1234	4.3107	41.8701	6.53758	27.0962	4.04178	26.3885	2.31181	G	Not in top 8000 most variable DETs	No
Solyc05g018620	Regulator of chromosome condensation (RCC1)-like protein (D0NEM9_PHYIN)	1408.91	15.8231	1313.3	62.1292	1047.56	44.4413	1171.85	25.9215	G	blue	No
Solyc01g091110	Pectinesterase/pectinesterase inhibitor 3 (PME3_ARATH)	37.0768	9.42818	48.1391	16.0061	86.2706	7.015	46.4308	3.91038	G	Not in top 8000 most variable DETs	No
Solyc09g008500	Non-specific lipid-transfer protein (Q1PCI0_SOLCH)	9.41309	2.43759	27.3504	11.2331	37.3851	3.94681	28.0481	1.80923	G	Not in top 8000 most variable DETs	No
Solyc01g080720	Pentatricopeptide repeat-containing protein (D7L610_ARALY)	123.251	3.81775	132.418	7.29678	170.57	9.15873	149.236	6.06799	G	Not in top 8000 most variable DETs	No
Solyc05g055020	Light-dependent short hypocotyls 1 (D7M6V0_ARALY)	39.6751	5.73764	35.681	2.33884	18.8836	2.09415	31.0732	2.33055	G	Not in top 8000 most variable DETs	No
Solyc01g067680	Tubby-like F-box protein 6 (TLP6_ORYSJ)	593.801	29.0362	529.34	15.2302	445.582	11.6823	429.546	15.8253	G	Not in top 8000 most variable DETs	No
Solyc04g025520	Copia-type polyprotein (C0JJI2_SOYBN)	109.425	14.6743	63.2902	6.24095	42.5419	6.55921	67.2666	7.55674	G	Not in top 8000 most variable DETs	No
Solyc04g080060	APO protein 4, mitochondrial (APO4_ARATH)	318.678	15.7891	343.708	18.5653	417.296	17.8651	400.034	14.1063	G	Not in top 8000 most variable DETs	No
Solyc12g098910	CBL-interacting protein kinase 1 (A0MNI9_POPTR)	411.495	28.1519	462.367	38.6727	596.058	59.2694	417.236	17.6622	G	yellow	No
Solyc03g006310	Unknown Protein	277.151	6.57239	272.995	3.28988	361.191	19.1755	301.033	23.9675	G	Not in top 8000 most variable DETs	No
Solyc06g030490	Serine/threonine-protein phosphatase (D7LDT2_ARALY)	449.154	13.7538	460.492	14.7202	560.81	20.5119	536.066	25.1568	G	Not in top 8000 most variable DETs	No
Solyc12g098520	SolycHsfA5 (manually curated)	990.703	27.4186	1279.23	69.0352	1280	113.073	1253.12	84.7847	G	turquoise	No
Solyc12g100050	Slowmo homolog 2 (B5XGX8_SALSA)	408.1	6.6549	450.235	6.57052	527.373	25.6395	528.232	16.6784	G	Not in top 8000 most variable DETs	No
Solyc05g008550	Fruit-specific protein (FSPM_SOLLC)	15.9507	3.45231	24.4235	1.83599	34.4317	3.81743	28.1199	9.1945	G	Not in top 8000 most variable DETs	No
Solyc01g087670	Guanine nucleotide-binding protein G(I)/G(S)/G(T) subunit beta-1 (GBB1_DANRE)	766.603	14.0484	818.638	18.5299	935.315	27.956	870.648	34.2478	G	Not in top 8000 most variable DETs	No
Solyc11g067090	Peptidyl-prolyl cis-trans isomerase (A8NQ29_COPC7)	650.416	29.3405	691.206	9.03331	814.619	21.6743	790.04	15.4891	G	Not in top 8000 most variable DETs	No
Solyc12g088040	Receptor-like protein kinase At3g21340 (RLK6_ARATH)	851.34	18.794	1026.01	78.7371	672.648	41.2698	879.415	56.337	G	pink	No
Solyc06g009260	Unknown Protein	136.13	10.0264	109.267	3.99603	94.7269	6.98353	78.5441	10.3163	G	Not in top 8000 most variable DETs	No
Solyc02g063070	tft4 (manually curated)	5286.64	171.624	5382.03	131.929	6489.82	235.235	6355.49	99.7875	G	turquoise	No
Solyc02g079740	U-box domain-containing protein (Fragment) (B1P3P0_ARAHA)	313.905	22.0714	331.195	15.3276	243.457	4.53534	281.38	4.60666	G	Not in top 8000 most variable DETs	No
Solyc04g078110	serine protease SBT1 (manually curated)	656.423	43.3122	590.011	22.3904	485.432	40.2011	429.973	54.713	G	turquoise	No
Solyc06g069890	Nucleosome assembly protein family (A9RDJ7_PHYPA)	677.84	15.675	635.98	22.715	842.502	64.6337	691.895	14.3569	G	turquoise	No
Solyc11g017200	TPR repeat (Q31NR5_SYNE7)	2664.78	56.4419	2269.4	146.888	2152.38	79.8646	2167.55	141.494	G	turquoise	No
Solyc06g082610	Receptor like kinase, RLK	1244.09	19.2143	1135.78	49.7592	1011.2	21.5374	1065.71	35.7009	G	turquoise	No
Solyc05g015470	Drought-induced protein 1 (Q6XPS8_9FABA)	196.389	12.2439	224.192	15.7783	142.289	10.9528	181.556	5.42815	G	Not in top 8000 most variable DETs	No
Solyc11g017360	Myb family transcription factor (Fragment) (D7M1F0_ARALY)	341.396	11.6524	279.838	32.8242	229.745	15.962	276.318	5.3565	G	Not in top 8000 most variable DETs	No
Solyc07g021340	Unknown Protein	85.9853	11.3697	71.6885	7.83699	45.4069	2.30692	48.2297	0.971816	G	Not in top 8000 most variable DETs	No
Solyc10g074630	ADP-ribosylation factor (B0WVM5_CULQU)	312.365	7.34996	357.816	11.4906	406.33	15.1631	394.366	13.8124	G	Not in top 8000 most variable DETs	No
Solyc05g026130	AP-4 complex subunit sigma-1 (B4FTQ9_MAIZE)	655.958	31.4537	703.163	18.2071	823.05	43.392	715.832	12.3365	G	Not in top 8000 most variable DETs	No
Solyc09g065590	Os12g0604200 protein (Fragment) (Q0IM29_ORYSJ)	386.451	5.92974	294.02	11.9179	285.9	12.2546	251.676	11.4711	G	Not in top 8000 most variable DETs	No
Solyc11g069860	Glutaredoxin (Q8S3L1_9ROSI)	712.788	4.47841	675.806	19.2636	901.306	50.9191	742.982	39.0871	G	turquoise	No
Solyc10g079430	U3 small nucleolar RNA-associated protein 11 (B6TNQ8_MAIZE)	394.438	7.11053	354.765	8.4741	508.352	20.9701	467.636	9.95679	G	Not in top 8000 most variable DETs	No
Solyc11g061700	Acetyl-CoA carboxylase-like protein (Q8ABH3_BACTN)	1.20287	0.91816	7.33962	5.33544	18.6767	5.14099	20.1509	4.07718	G	Not in top 8000 most variable DETs	No
Solyc06g071260	AT3g47831/T23J7 (Q94F43_ARATH)	127.957	9.63235	121.684	4.23524	179.721	18.5767	159.943	9.39531	G	Not in top 8000 most variable DETs	No
Solyc09g007200	Pentatricopeptide repeat-containing protein (D7M7W8_ARALY)	451.414	8.69735	429.244	24.6921	345.129	14.2072	406.054	10.1172	G	Not in top 8000 most variable DETs	No
Solyc03g063600	Guanylate kinase (Q9FVC6_TOBAC)	2141.83	30.4891	2057.07	60.0942	1687.37	57.4789	1714.53	26.3473	G	turquoise	No
Solyc03g077920	Phosphoribosylanthranilate transferase (Fragment) (Q43085_PEA)	428.077	21.1744	443.566	28.3016	329.786	16.8257	373.507	30.9243	G	Not in top 8000 most variable DETs	No
Solyc08g068420	FAD-linked oxidoreductase (C7Q9M7_CATAD)	192.23	4.87096	156.825	8.89473	130.412	15.7975	131.564	7.69707	G	Not in top 8000 most variable DETs	No
Solyc11g013550	Transmembrane protein 50A (B6SZ92_MAIZE)	326.033	29.3435	379.835	7.87211	410.503	27.9396	391.061	9.47189	G	Not in top 8000 most variable DETs	No
Solyc01g096410	Phosphatidylinositol-4-phosphate 5-kinase family protein (D7L735_ARALY)	86.3014	3.66672	103.172	4.27994	123.039	4.53482	85.4212	7.31551	G	Not in top 8000 most variable DETs	No
Solyc10g005890	DNA-damage inducible protein DDI1-like (Q8LF25_ARATH)	1305.85	54.3217	1337.81	51.7878	1644.9	44.9333	1586.87	53.1727	G	turquoise	No
Solyc12g009180	Cupin superfamily (DUF985) (D9YHB2_9DELT)	780.014	17.7729	796.371	12.0892	971.341	28.0185	902.173	33.7395	G	turquoise	No
Solyc05g014650	Iojap-like protein (B5ZUF1_RHILW)	240.794	7.59644	232.076	9.31171	307.855	12.3746	297.871	17.4248	G	Not in top 8000 most variable DETs	No
Solyc01g087060	Ring-h2 finger protein (C1ECT6_9CHLO)	207.513	10.1253	172.81	12.749	148.382	6.94305	137.096	7.12752	G	Not in top 8000 most variable DETs	No
Solyc03g006580	Ran-binding proteins 9/10 homolog (RBP9X_DROME)	702.125	7.17494	687.488	35.3075	893.685	33.7167	830.999	26.7524	G	turquoise	No
Solyc03g062680	Unknown Protein; contains Interpro domain(s) IPR015267 Protein phosphatase 4 core regulatory subunit R2	480.664	12.2608	467.32	7.03329	600.16	26.0437	568.011	17.181	G	Not in top 8000 most variable DETs	No
Solyc04g077300	Serine/threonine-protein kinase receptor (B6U2B7_MAIZE)	27.2707	2.67359	46.2085	4.60061	13.4011	2.79723	28.5526	5.38759	G	Not in top 8000 most variable DETs	No
Solyc08g023440	Early-responsive to dehydration 4 (D7KET4_ARALY)	2425.71	89.0226	2459.97	66.1881	1993.94	73.6514	2297.41	92.2815	G	turquoise	No
Solyc01g102640	Nucleoporin (Fragment) (Q677F1_HYAOR)	508.611	54.2323	464.067	25.0935	358.803	30.3274	409.544	12.8514	G	turquoise	No
Solyc05g012550	Remorin family protein (D7MUJ3_ARALY)	131.983	5.20962	112.958	5.48637	82.4034	8.56546	88.7031	12.4698	G	Not in top 8000 most variable DETs	No
Solyc03g053040	Unknown Protein	1067.08	30.996	1012.98	34.2445	852.126	70.815	914.685	32.8708	G	yellow	No
Solyc09g056130	Ribosomal protein L15 (B3TM29_ELAGV)	768.543	38.145	708.793	28.9466	601.455	40.3324	582.976	30.7484	G	turquoise	No
Solyc06g074820	tonoplast intrinsic protein 1.1 (manually curated)	34731.8	1772.31	35765.9	1167.65	41902.3	2557	42591.8	1850.15	G	turquoise	No
Solyc00g007150	Unknown Protein	93.4495	9.31905	92.7659	10.2672	149.511	13.038	119.951	2.19747	G	Not in top 8000 most variable DETs	No
Solyc08g075790	Vacuolar sorting protein (C0S0X8_PARBP)	93.301	5.73732	93.1537	7.3798	45.1548	2.34391	63.2001	3.74318	G	Not in top 8000 most variable DETs	No
Solyc02g071580	Subtilisin-like protease (Q9FK77_ARATH)	316.725	19.4193	256.335	23.3605	222.548	19.5526	202.496	4.08808	G	Not in top 8000 most variable DETs	No
Solyc08g065350	Histone deacetylase 11 (B6T7F6_MAIZE)	548.49	28.907	510.655	11.4771	400.114	31.1137	423.05	20.6538	G	Not in top 8000 most variable DETs	No
Solyc12g070080	N-acylethanolamine amidohydrolase (D7MRU1_ARALY)	44.6664	1.78493	68.4517	4.79069	90.4168	21.573	69.8149	6.86005	G	Not in top 8000 most variable DETs	No
Solyc12g096110	Protein BREVIS RADIX (BRX_ARATH)	70.0511	9.1621	54.0042	2.90163	37.1443	3.98072	37.9269	1.8054	G	Not in top 8000 most variable DETs	No
Solyc03g058160	EPF-type Cis2-His2 zinc finger transcription factor (D8RBD0_SELML)	44.1773	3.38474	39.2952	2.08699	22.3209	3.97675	24.7594	2.1309	G	Not in top 8000 most variable DETs	No
Solyc07g017540	LEU22441 LeRAD51 (manually curated)	98.1737	5.21797	93.6515	5.36004	143.495	10.4769	124.863	7.49595	G	Not in top 8000 most variable DETs	No
Solyc05g010300	DNA-directed RNA polymerase II subunit 3 (A4RSP9_OSTLU)	696.516	21.3168	695.062	21.1402	860.89	25.2081	825.946	30.1684	G	turquoise	No
Solyc08g042000	Sucrose phosphate synthase protein 1 (B2BMQ3_PRUPE)	148.646	5.84396	123.016	8.91032	104.57	6.79653	127.972	8.50071	G	Not in top 8000 most variable DETs	No
Solyc09g010400	Histone H2A (B9T4D3_RICCO)	5413.34	177.673	5500.5	75.1679	6917.31	373.938	6506.94	169.295	G	turquoise	No
Solyc10g008980	triose phosphate translocator (manually curated)	17910.1	388.601	16641.9	534.277	14588	789.604	16948.1	312.972	G	yellow	No
Solyc12g019700	Unknown Protein	151.216	13.7623	151.807	15.3423	104.984	6.73531	124.42	7.85737	G	Not in top 8000 most variable DETs	No
Solyc11g020850	IFA binding protein (A6MGY3_LILLO)	17.612	2.69998	14.0428	1.79403	34.7414	1.97389	25.6381	2.7307	G	Not in top 8000 most variable DETs	No
Solyc06g069230	DNA mismatch repair protein muts (D2V0B3_NAEGR)	170.966	8.66961	175.169	10.8855	228.982	21.1328	188.686	5.15884	G	Not in top 8000 most variable DETs	No
Solyc01g080160	Cbs domain containing protein expressed (Fragment) (A6N095_ORYSI)	649.77	9.42456	709.923	33.4473	805.525	20.7733	789.65	14.7756	G	Not in top 8000 most variable DETs	No
Solyc12g015780	DNA-directed RNA polymerase subunit D (A8B9C8_GIALA)	324.545	7.84357	280.741	9.79702	427.968	21.0194	333.334	8.193	G	Not in top 8000 most variable DETs	No
Solyc07g052340	Exosome complex exonuclease RRP6-like protein (D0MWN1_PHYIN)	365.562	14.825	356.454	11.7492	483.88	22.2455	423.455	24.8893	G	Not in top 8000 most variable DETs	No
Solyc09g091370	At1g04650-like protein (Fragment) (C0JC61_9BRAS)	87.1232	5.45716	94.9724	5.14177	129.217	7.8601	111.178	5.96375	G	Not in top 8000 most variable DETs	No
Solyc05g026240	LRR receptor-like serine/threonine-protein kinase, RLP	732.461	30.5767	660.131	33.8249	579.02	19.2262	557.619	33.974	G	turquoise	No
Solyc06g009170	Epoxide hydrolase 1 (D8L7V7_PRUPE)	305.721	14.8759	383.574	26.6711	398.248	19.5923	434.405	17.4497	G	Not in top 8000 most variable DETs	No
Solyc03g083620	Unknown Protein	1043.77	50.8093	1237.19	44.618	844.345	57.2733	886.13	41.4783	G	turquoise	No
Solyc10g054330	Cellular nucleic acid-binding protein (B6T3W5_MAIZE)	1290.56	30.3983	1373.13	21.507	1593.86	71.438	1550.31	47.6507	G	turquoise	No
Solyc09g061430	nuclear GTPase DQ304482 (manually curated)	982.916	11.4375	928.189	6.77195	1282.34	69.6324	1074.02	25.0009	G	turquoise	No
Solyc02g088070	Dof zinc finger protein (C4B6D7_IPOBA)	421.376	11.3045	422.204	27.7135	319.783	7.58134	345.042	17.1773	G	Not in top 8000 most variable DETs	No
Solyc01g104200	Fatty acyl coA reductase (Q8L4M0_WHEAT)	97.73	10.6213	90.8246	7.28915	52.0146	11.5476	57.8535	7.977	G	Not in top 8000 most variable DETs	No
Solyc10g050450	Expp1 protein (B6T683_MAIZE)	14.4553	1.64517	15.4782	3.4923	37.7625	8.52588	16.4607	2.81499	G	Not in top 8000 most variable DETs	No
Solyc09g075420	ethylene response factor 2b (manually curated)	880.295	50.5233	834.106	62.176	706.07	43.1618	710.289	31.7503	G	turquoise	No
Solyc05g041430	Unknown Protein	500.968	33.7255	434.835	17.8399	356.191	30.7845	417.819	9.1753	G	Not in top 8000 most variable DETs	No
Solyc08g006870	BZIP domain class transcription factor (D9ZIQ8_MALDO)	412.13	12.5739	377.54	13.1239	324.383	18.2967	363.234	8.34584	G	Not in top 8000 most variable DETs	No
Solyc10g049620	Progesterone 5-beta-reductase (D6NIX2_ATRBE)	2536.29	33.6985	2806.21	207.157	3097.62	100.058	2972.66	79.0169	G	turquoise	No
Solyc06g076030	Dof zinc finger protein (Q9M4G1_SOLTU)	436.295	18.9018	405.539	5.2972	326.124	14.6385	343.997	8.32524	G	Not in top 8000 most variable DETs	No
Solyc11g067060	Low molecular weight protein-tyrosine-phosphatase slr0328 (B6TIW5_MAIZE)	704.758	16.6434	573.459	20.4287	553.275	34.3415	518.773	36.3122	G	turquoise	No
Solyc03g059080	Receptor-like kinase (A7VM24_MARPO)	36.6385	6.51128	39.7168	8.2173	60.8432	3.78035	60.4254	6.73007	G	Not in top 8000 most variable DETs	No
Solyc11g013260	Prohibitin (O04361_TOBAC)	1249.81	28.9265	1194.81	19.8295	1547.87	68.8761	1416.54	34.0006	G	turquoise	No
Solyc11g007800	Ribonuclease P/MRP protein subunit (A8NQR7_COPC7)	185.422	6.47208	169.756	11.2626	250.102	23.8545	214.21	5.6116	G	Not in top 8000 most variable DETs	No
Solyc10g044710	TPR repeat (Q2HW44_MEDTR)	609.139	16.3794	538.54	13.7655	480.53	13.2579	523.51	36.8024	G	Not in top 8000 most variable DETs	No
Solyc01g091930	Subtilisin-like serine protease (Q8L7D2_ARATH)	289.389	14.4285	259.72	7.26013	192.564	22.64	206.941	7.0125	G	Not in top 8000 most variable DETs	No
Solyc09g066280	Uncharacterized basic helix-loop-helix protein At1g06150 (Y1615_ARATH)	1060.52	47.6328	1025.98	45.6929	864.269	26.8754	893.143	12.7372	G	blue	No
Solyc04g080870	Peptidase S16 lon domain protein (D7E103_NOSA0)	588.683	38.0873	460.102	46.2161	377.934	28.6438	457.197	16.045	G	yellow	No
Solyc01g087290	TRNA-dihydrouridine synthase (A2VQL7_9BURK)	3397.58	89.737	3352.65	89.7027	2662.49	160.187	3051.47	73.1199	G	turquoise	No
Solyc05g012720	Mitotic checkpoint protein BUB3 (B4FRV7_MAIZE)	64.0209	2.68389	57.2063	2.79445	83.2586	3.37803	50.2702	3.54237	N	Not in top 8000 most variable DETs	No
Solyc02g093740	R2R3MYB transcription factor 99 (manually curated)	381.235	13.2571	500.754	60.2531	348.774	12.4892	503.653	25.6627	N	blue	No
Solyc11g007590	OTU domain-containing protein 4 (OTUD4_HUMAN)	612.802	18.0245	671.162	33.9886	541.199	33.4908	739.65	17.6868	N	black	No
Solyc01g058670	Transcription factor (D7L4N5_ARALY)	1434.29	21.7891	1424.88	60.236	1618.84	68.9004	1267.82	30.0364	N	black	No
Solyc02g067350	cDNA clone J023065D24 full insert sequence (B7EKP5_ORYSJ)	19.4767	1.70627	22.8005	2.54552	35.9909	8.00832	14.9853	0.90263	N	Not in top 8000 most variable DETs	No
Solyc11g013500	Unknown Protein	136.786	12.8469	114.292	3.41833	155.748	11.1028	92.5485	4.65334	N	Not in top 8000 most variable DETs	No
Solyc01g110570	Small auxin up-regulated RNA4 (manually curated)	49.9497	3.13092	42.3181	6.29995	65.0798	4.70952	34.3245	1.44538	N	Not in top 8000 most variable DETs	No
Solyc06g069130	Kinesin-like protein 73641-79546 (Q9CAC9_ARATH)	115.936	9.08193	132.361	15.2939	86.8613	6.51267	142.664	19.1992	N	Not in top 8000 most variable DETs	No
Solyc05g014220	Unknown Protein	189.556	4.48877	256.751	21.4058	148.321	10.7979	260.067	19.3315	N	Not in top 8000 most variable DETs	No
Solyc05g052670	N-hydroxycinnamoyl/benzoyltransferase 1 (Q00M72_SOYBN)	249.015	26.9399	306.545	69.3702	210.013	16.3532	416.852	12.3147	N	blue	No
Solyc12g088370	Interferon-related developmental regulator family protein (B4FQN7_MAIZE)	478.29	32.6741	516.131	26.8282	430.743	2.30974	573.409	15.5779	N	Not in top 8000 most variable DETs	No
Solyc09g061250	Phototropic-responsive NPH3 family protein (D7MMM6_ARALY)	155.157	5.15882	142.424	21.6303	200.315	11.5132	124.376	2.49766	N	Not in top 8000 most variable DETs	No
Solyc04g077470	Cellulose synthase-like C1-2 glycosyltransferase family 2 protein (D8T077_SELML)	1389.92	53.7572	1534.85	24.9851	1209.3	81.0165	1664.89	42.9009	N	black	No
Solyc01g090560	Ethylene-responsive transcription factor 4 (ERF78_ARATH)	119.078	9.51898	139.487	2.87919	96.1928	11.1644	147.075	7.04494	N	Not in top 8000 most variable DETs	No
Solyc02g090950	BHLH transcription factor-like (Q8S0N2_ORYSJ)	1060.14	27.7951	902.987	62.8225	1208.41	24.1502	838.011	37.2049	N	black	No
Solyc05g006220	IAA-amino acid hydrolase (D5FTH2_POPTO)	87.4338	13.2787	118.29	30.0604	48.3131	14.405	182.24	32.9232	N	Not in top 8000 most variable DETs	No
Solyc02g083930	Unknown Protein	71.0774	3.52594	53.7846	5.61445	83.2272	3.31473	45.4622	2.09417	N	Not in top 8000 most variable DETs	No
Solyc04g048900	Calreticulin 2 calcium-binding protein (A8HMC0_CHLRE)	111.949	6.4368	160.858	32.9557	58.0511	13.5062	140.578	21.7257	N	Not in top 8000 most variable DETs	No
Solyc01g066440	Unknown Protein	192.07	7.60565	148.417	10.1106	197.015	2.96752	138.732	8.2139	N	Not in top 8000 most variable DETs	No
Solyc05g055470	NAC domain protein IPR003441 (A9PB02_POPTR)	1102.69	41.2298	1205.04	27.0226	1043.06	27.1326	1319.89	17.5627	N	black	No
Solyc03g095310	Cytochrome P450	220.509	7.08463	208.882	6.40709	270.713	15.2455	185.35	10.8341	N	Not in top 8000 most variable DETs	No
Solyc01g068490	U-box domain-containing protein (Q1ENX4_MUSAC)	26.0127	0.717493	36.8672	6.65474	14.264	2.67616	34.7606	6.4342	N	Not in top 8000 most variable DETs	No
Solyc06g036260	beta-carotene hydroxylase-1 (manually curated)	875.763	18.1724	1035.96	93.736	803.729	47.8006	1108.92	37.9322	N	black	No
Solyc12g005840	Ras-related protein Rab-5C (B5X4R4_SALSA)	187.393	5.51263	241.611	21.4362	178.383	11.102	256.999	15.5026	N	Not in top 8000 most variable DETs	No
Solyc11g013010	MORN repeat protein (A3V9K0_9RHOB)	1558.54	27.9522	1411.9	64.7471	1761.69	26.6387	1320.5	74.6756	N	blue	No
Solyc01g106290	Unknown Protein	215.904	7.00681	245.787	16.1911	182.647	12.5958	270.01	14.6692	N	Not in top 8000 most variable DETs	No
Solyc07g042170	Jasmonate ZIM-domain protein 3 (B3Y563_TOBAC)	946.443	28.9631	1050.22	202.238	810.488	104.967	1553.62	216.394	N	grey	No
Solyc02g068080	Voltage-gated chloride channel (Q96325_ARATH)	1330.89	43.1538	1428.19	47.1508	1189.44	51.9781	1658.32	43.8899	N	black	No
Solyc08g061910	Unknown Protein	361.918	19.5857	321.759	20.5591	375.93	29.9221	266.765	27.3925	N	Not in top 8000 most variable DETs	No
Solyc05g054860	Pto-like, Serine/threonine kinase protein, resistance protein	348.739	11.2611	375.867	23.3266	302.748	16.145	449.388	25.952	N	Not in top 8000 most variable DETs	No
Solyc01g109710	Universal stress protein (B6SNQ1_MAIZE)	303.698	22.4891	411.899	66.0706	222.587	22.732	384.681	20.7328	N	black	No
Solyc12g013960	Unknown Protein; contains Interpro domain(s) IPR007789 Protein of unknown function DUF688	201.417	11.4959	237.373	9.58461	167.049	5.72107	238.697	6.84777	N	Not in top 8000 most variable DETs	No
Solyc02g078820	Lysine ketoglutarate reductase trans-splicing related 1 (Q8H767_ARATH)	421.88	16.2672	448.612	43.7375	360.736	5.33049	490.07	6.48386	N	Not in top 8000 most variable DETs	No
Solyc02g078810	Bromodomain protein (B9H245_POPTR)	99.2853	4.38446	116.36	10.4063	72.5076	0.907725	112.228	5.13698	N	Not in top 8000 most variable DETs	No
Solyc07g062780	E3 SUMO-protein ligase NSE2 (C3KJP6_ANOFI)	278.123	13.9641	224.588	18.8401	351.409	15.3746	235.68	6.47092	N	Not in top 8000 most variable DETs	No
Solyc02g082760	ethylene-responsive catalase (manually curated)	6187.7	237.092	7366.16	155.323	5368.12	96.608	7038.24	230.715	N	blue	No
Solyc04g079980	BES1/BZR1 homolog protein 2 (BEH2_ARATH)	1156.26	23.208	1056.68	76.7438	1405.96	15.4554	1039.72	37.9089	N	blue	No
Solyc03g111290	Cytochrome P450	14.784	4.33572	61.5488	33.2715	2.78722	0.458802	60.0757	9.87156	N	Not in top 8000 most variable DETs	No
Solyc00g009090	Receptor like kinase, RLK	596.318	14.5257	520.986	51.5878	668.53	50.7316	418.977	20.3923	N	black	No
Solyc01g008690	GDP-mannose transporter (B2VUF6_PYRTR)	30.0025	6.00611	46.5841	3.00225	29.3941	4.10984	73.6622	12.1633	N	Not in top 8000 most variable DETs	No
Solyc05g012140	Pentatricopeptide repeat-containing protein At2g30100, chloroplastic (PP176_ARATH)	712.715	20.9653	874.92	52.047	621.308	55.8277	918.159	47.4652	N	black	No
Solyc01g096120	Dof zinc finger protein1 (manually curated)	189.465	7.44306	176.849	11.5199	207.317	12.7042	134.723	7.97585	N	Not in top 8000 most variable DETs	No
Solyc02g084870	mitogen-activated protein kinase 8 (manually curated)	377.722	10.2379	373.18	10.6741	318.023	24.0698	449.905	29.0437	N	Not in top 8000 most variable DETs	No
Solyc06g034290	Glycerol-3-phosphate transporter (A0PYC4_CLONN)	541.051	27.2116	607.735	21.8178	458.93	33.0337	609.079	18.3343	N	Not in top 8000 most variable DETs	No
Solyc11g007390	UDP-glucosyltransferase (Q8LKG3_STERE)	204.61	9.52405	209.204	14.6298	167.735	7.48839	240.375	20.3356	N	Not in top 8000 most variable DETs	No
Solyc02g091670	Octicosapeptide/Phox/Bem1p domain-containing protein (D7L8F8_ARALY)	485.723	12.1215	406.972	13.9945	567.715	28.0345	326.501	15.1484	N	black	No
Solyc01g088250	SUN domain protein3 (manually curated)	1360.1	57.176	1143.5	107.032	1376.89	57.1917	995.143	71.5901	N	black	No
Solyc06g007370	Os04g0630700 protein (Fragment) (Q0J9U7_ORYSJ)	391.278	26.0294	424.141	23.3584	316.492	13.5833	470.704	38.5215	N	Not in top 8000 most variable DETs	No
Solyc05g052820	proline transporter 3 (manually curated)	501.553	27.6781	471.533	30.0326	607.163	28.8753	442.476	11.2745	N	Not in top 8000 most variable DETs	No
Solyc05g055910	Genomic DNA chromosome 5 P1 clone MRH10 (Q9FND1_ARATH)	331.716	9.5787	381.207	26.9223	261.75	13.0281	350.001	19.252	N	Not in top 8000 most variable DETs	No
Solyc10g044470	Voltage-gated chloride channel (Q96325_ARATH)	3907.71	127.576	4413.93	64.8818	3843.94	170.107	4921.9	53.3014	N	brown	No
Solyc02g078720	Unknown Protein	182.418	11.1258	144.623	7.19287	196.816	6.90211	132.323	3.10324	N	Not in top 8000 most variable DETs	No
Solyc10g086180	Phenylalanine ammonia-lyase (D2CFQ1_9SOLA)	2056.35	41.3968	2731.98	84.8987	1990.58	243.141	2794.54	200.975	N	blue	No
Solyc07g052640	Glycosyltransferase-like protein (D8QTD2_SELML)	473.038	11.9553	459.807	11.3897	522.707	13.9732	384.984	10.5322	N	Not in top 8000 most variable DETs	No
Solyc01g091630	cutin deficient 2 (manually curated)	3209.27	114.792	3462.85	32.1992	2758.9	209.726	3677.82	135.218	N	pink	No
Solyc03g120550	Peptide transporter 1 (Q7XAC3_VICFA)	1486.75	74.3847	1551.58	32.265	1225.99	77.2034	1862.78	56.904	N	black	No
Solyc01g105370	Enoyl-(Acyl-carrier-protein) reductase II (C7IPB6_THEET)	1591.96	31.0566	1777.41	95.7912	1541.07	75.115	2117.68	146.166	N	black	No
Solyc04g072700	Metal ion binding protein (B6U811_MAIZE)	8.85792	2.12398	13.4856	5.30253	8.11405	0.638146	23.3278	0.58088	N	Not in top 8000 most variable DETs	No
Solyc12g062260	5&apos-AMP-activated protein kinase beta-1 subunit (C6LYW2_GIALA)	391.538	27.5954	293.99	12.1849	375.42	8.49156	257.046	16.6263	N	Not in top 8000 most variable DETs	No
Solyc00g048510	Phloem lectin (Q8LK67_9ROSI)	31.4281	3.62918	39.2067	8.18386	27.0334	5.06539	64.2624	7.51096	N	Not in top 8000 most variable DETs	No
Solyc10g008440	Expansin B1 (C8CC40_RAPSA)	302.252	11.3412	280.532	17.4783	337.484	16.682	242.158	26.4354	N	Not in top 8000 most variable DETs	No
Solyc04g015070	C2 domain containing protein (Q2A9R2_BRAOL)	257.866	13.8245	283.192	12.0928	207.572	10.5492	305.968	18.7503	N	Not in top 8000 most variable DETs	No
Solyc06g007620	POT family domain containing protein expressed (D8L9H8_WHEAT)	1112.62	44.2643	1029.26	154.811	1348.49	62.5634	924.372	58.7347	N	blue	No
Solyc12g005980	Zinc ion binding protein (C6HA87_AJECH)	949.802	87.6602	977.042	7.21803	832.044	23.4537	1119.91	43.4914	N	black	No
Solyc06g066820	Le3OH-13b-hydroxylase (manually curated)	56.8343	4.83597	41.6906	10.1524	66.6219	5.85393	31.8268	2.55779	N	Not in top 8000 most variable DETs	No
Solyc08g060810	EIN3-binding F-box protein 2 (manually curated)	3528.82	185.406	4411.66	232.363	3462.12	256.703	4436.88	173.62	N	black	No
Solyc01g103990	T-complex protein 11 (D7KML1_ARALY)	3054.8	117.528	3417.11	84.3923	2553.04	153.517	3464.27	99.3964	N	blue	No
Solyc03g097380	Heavy metal-associated domain containing protein expressed (Q7XG81_ORYSJ)	1649.08	88.7454	1367.01	23.7911	1825.08	180.306	1379.02	58.7735	N	brown	No
Solyc07g006850	Xyloglucan endotransglucosylase/hydrolase 3 (Q06BI4_CUCME)	90.5387	8.44004	103.095	6.1513	63.7937	3.91577	111.223	17.1581	N	Not in top 8000 most variable DETs	No
[truncated: 6,067 more rows]

## Sheet: Supp_Tab_3
Supplemental Table 3. Genes found to be differentialy expressed after 60 minutes of red light in both A. thaliana (Tepperman et al., 2006) and S. lycopersicum. Only genes with reciprocal best BLAST hit orthologs between A. thaliana and S. lycopersicum were compared.
Sol Gene ID	AT Gene ID	Direction of Regulation in R	AT Locus Description	Sol Locus Description
Solyc01g067330	AT4G15630	Up	integral membrane family protein contains TIGRFAM TIGR01569 : plant integral membrane protein TIGR01569; contains Pfam PF04535 : Domain of unknown function (DUF588)	UPF0497 membrane protein 4 (U4974_VITVI)
Solyc01g067660	AT5G18670	Up	beta-amylase; putative (BMY3) / 1;4-alpha-D-glucan maltohydrolase; putative almost identical to beta-amylase BMY3 GI:15149457 from 1rabidopsis thaliana]; identical to cDNA putative beta-amylase BMY3 (BMY3) GI:15149456	1,4-alpha-glucan-maltohydrolase (manually curated)
Solyc01g105120	AT5G64170	Up	dentin sialophosphoprotein-related contains weak similarity to Swiss-Prot:Q9NZW4 dentin sialophosphoprotein precursor 1Homo sapiens]	Os01g0498200 protein (Fragment) (Q0JMJ0_ORYSJ)
Solyc01g106210	AT5G09590	Up	heat shock protein 70 / HSP70 (HSC70-5) identical to heat shock protein 70 1rabidopsis thaliana] GI:6746590	Chaperone DnaK (A2Q199_MEDTR)
Solyc01g110180	AT4G39070	Down	zinc finger (B-box type) family protein salt-tolerance protein - Arabidopsis thaliana; PID:e224078	Zinc finger protein CONSTANS-LIKE 1 (COL1_ARATH)
Solyc02g036370	AT5G17300	Up	myb family transcription factor similar to CCA1 1rabidopsis thaliana] GI:4090569; contains Pfam profile PF00249: Myb-like DNA-binding domain	Myb family transcription factor (manually curated)
Solyc02g062690	AT4G36540	Down	basic helix-loop-helix (bHLH) family protein contains Pfam domain; PF00010: Helix-loop-helix DNA-binding domain	Transcription factor (D6MKM4_9ASPA)
Solyc02g065050	AT2G39710	Up	aspartyl protease family protein contains profile Pfam PF00026: Eukaryotic aspartyl protease; contains Prosite PS00141: Eukaryotic and viral aspartyl proteases active site.;	Aspartic proteinase nepenthesin I (A9ZMF9_NEPAL)
Solyc02g067230	AT5G39660	Up	Dof-type zinc finger domain-containing protein similar to H-protein promoter binding factor-2a GI:3386546 from 1rabidopsis thaliana]	Dof zinc finger protein3 (manually curated)
Solyc02g084990	AT5G66460	Up	(1-4)-beta-mannan endohydrolase; putative similar to (1-4)-beta-mannan endohydrolase 1Coffea arabica] GI:10178872; contains Pfam profile PF00150: Cellulase (glycosyl hydrolase family 5)	Mannan endo-1 4-beta-mannosidase (A8FDC6_BACP2)
Solyc02g091470	AT5G37790	Up	protein kinase family protein contains protein kinase domain; Pfam:PF00069	Serine/threonine protein kinase-like (Q9FGC3_ARATH)
Solyc03g006880	AT4G25420	Down	gibberellin 20-oxidase identical to GI:1109695	gibberellin 20-oxidase-1 (manually curated)
Solyc03g007370	AT5G24120	Up	RNA polymerase sigma subunit SigE (sigE) / sigma-like factor (SIG5) identical to RNA polymerase sigma subunit SigE 1rabidopsis thaliana] GI:4972299; sigma-like factor 1rabidopsis thaliana] GI:4033838; contains Pfam profiles PF04545: Sigma-70; region 4; PF04539: Sigma-70 region 3; PF04542: Sigma-70 region 2	RNA polymerase sigma factor (C7QR23_CYAP0)
Solyc03g097370	AT5G35970	Up	DNA-binding protein; putative similar to SWISS-PROT:Q60560 DNA-binding protein SMUBP-2 (Immunoglobulin MU binding protein 2; SMUBP-2) 1Mesocricetus auratus]	DNA helicase-like (Q9FGC2_ARATH)
Solyc03g097500	AT5G41040	Opposite	transferase family protein similar to hypersensitivity-related gene product HSR201 - Nicotiana tabacum; EMBL:X95343; contains Pfam transferase family domain PF00248	Hydroxycinnamoyl CoA shikimate/quinate hydroxycinnamoyltransferase-like protein (B9IFG0_POPTR)
Solyc03g098320	AT1G18330	Up	myb family transcription factor	MYB transcription factor (Fragment) (A1DR85_CATRO)
Solyc03g111300	AT3G48520	Up	cytochrome P450 family protein similar to Cytochrome P450 94A1 (P450-dependent fatty acid omega-hydroxylase) (SP:O81117) {Vicia sativa}; contains Pfam profile: PF00067 cytochrome P450	Cytochrome P450
Solyc03g115900	AT3G47470	Up	chlorophyll A-B binding protein 4; chloroplast / LHCI type III CAB-4 (CAB4) identical to SP|P27521 Chlorophyll A-B binding protein 4; chloroplast precursor (LHCI type III CAB-4) (LHCP) {Arabidopsis thaliana}	Chlorophyll a-b binding protein P4, chloroplastic (CB24_PEA)
Solyc03g115940	AT3G47500	Up	Dof-type zinc finger domain-containing protein identical to H-protein promoter binding factor-2a GI:3386546 from 1rabidopsis thaliana]	Dof zinc finger protein (C4B6D7_IPOBA)
Solyc03g117360	AT1G15750	Up	WD-40 repeat family protein contains 10 WD-40 repeats (PF00400) (1 weak)	TOPLESS1 (manually curated)
Solyc03g121880	AT1G72770	Up	protein phosphatase 2C P2C-HA / PP2C P2C-HA (P2C-HA) identical to protein phosphatase 2C (AtP2C-HA) GB:AJ003119 1rabidopsis thaliana] (Plant Mol. Biol. 38 (5); 879-883 (1998))	Protein phosphatase 2C (A5A6P8_WHEAT)
Solyc04g005380	AT1G69260	Up	expressed protein	Ninja-family protein Os03g0214200 (NNJA1_ORYSJ)
Solyc04g015750	AT5G13630	Up	magnesium-chelatase subunit chlH; chloroplast; putative / Mg-protoporphyrin IX chelatase; putative (CHLH) nearly identical to magnesium chelatase subunit GI:1154627 from 1rabidopsis thaliana]; contains Pfam profile: PF02514 CobN/magnesium chelatase family protein	Magnesium chelatase H subunit (D5KXY0_VITVI)
Solyc04g063380	AT1G21410	Up	F-box family protein similar to SKP1 interacting partner 2 (SKIP2) TIGR_Ath1:At5g67250	F-box/LRR-repeat protein 2 (B6TAC3_MAIZE)
Solyc04g081970	AT1G76080	Opposite	thioredoxin family protein low similarity to thioredoxin (TRX) 1Fasciola hepatica] GI:6687568; contains Pfam profile PF00085: Thioredoxin	Thioredoxin (D8U146_VOLCA)
Solyc05g005670	AT1G60190	Up	armadillo/beta-catenin repeat family protein / U-box domain-containing protein contains Pfam domain; PF00514: Armadillo/beta-catenin-like repeats and Pfam; PF04564: U-box domain	U-box domain-containing protein (D7LSY5_ARALY)
Solyc05g009790	AT1G13260	Down	DNA-binding protein RAV1 (RAV1) identical to SP|Q9ZWM9 DNA-binding protein RAV1 {Arabidopsis thaliana}; RAV1 GI:3868857 from 1rabidopsis thaliana]	Transcription factor (D6MKM9_9ASPA)
Solyc05g014710	AT1G67590	Down	remorin family protein contains Pfam domain; PF03763: Remorin; C-terminal region	Remorin family protein (D7KET1_ARALY)
Solyc05g025820	AT2G05940	Up	protein kinase; putative similar to auxin-regulated dual specificity cytosolic kinase 1Lycopersicon esculentum] gi|14484938|gb|AAK62821	ATP binding / serine-threonine kinase (C5DB71_VITVI)
Solyc05g047590	AT2G26440	Down	pectinesterase family protein contains Pfam profile: PF01095 pectinesterase	Pectinesterase (C0SPH5_PRUPE)
Solyc06g009510	AT2G47270	Up	expressed protein	Transcription factor bHLH151 (BH151_ARATH)
Solyc06g073320	AT4G26850	Up	expressed protein	GDP-L-galactose phosphorylase 1
Solyc07g043130	AT2G30520	Up	signal transducer of phototropic response (RPT2) identical to RPT2 1rabidopsis thaliana] gi|6959488|gb|AAF33112	Os12g0117400 protein (Fragment) (Q0IQJ6_ORYSJ)
Solyc07g063410	AT4G27410	Up	no apical meristem (NAM) family protein (RD26) contains Pfam PF02365: No apical meristem (NAM) domain; Arabidopsis thaliana nap gene;PID:e1234813; identical to cDNA RD26 mRNA for NAM-like protein GI:15375403	NAC domain protein IPR003441 (B9HZY3_POPTR)
Solyc08g016080	AT1G16720	Up	expressed protein	NAD-dependent epimerase/dehydratase (B3ECK3_CHLL2)
Solyc08g061130	AT5G11260	Up	bZIP protein HY5 (HY5) identical to HY5 protein GI:2251085 from 1rabidopsis thaliana]	Transcription factor HY5 (B6UHC7_MAIZE)
Solyc08g066440	AT5G11650	Up	hydrolase; alpha/beta fold family protein contains Pfam profile PF00561: hydrolase; alpha/beta fold family; low similarity to monoglyceride lipase from 1Homo sapiens] GI:14594904; 1Mus musculus] GI:2632162	Hydrolase alpha/beta fold family protein (D7KRI7_ARALY)
Solyc08g074270	AT5G24850	Up	cryptochrome dash (CRYD) nearly identical to cryptochrome dash 1rabidopsis thaliana] GI:28971609; similar to Deoxyribodipyrimidine photolyase (DNA photolyase) (Photoreactivating enzyme)(SP:Q55081){Synechocystis sp.}	Cryptochrome 3
Solyc08g078300	AT4G16780	Down	homeobox-leucine zipper protein 4 (HAT4) / HD-ZIP protein 4 SP|Q05466|HAT4_ARATH Homeobox-leucine zipper protein HAT4 (HD-ZIP protein 4) (SP:Q05466) 1rabidopsis thaliana] (HD-ZIP homeotic protein Athb-2	Homeobox-leucine zipper protein (Q40781_PIMBR)
Solyc08g080540	AT4G11660	Up	heat shock factor protein 7 (HSF7) / heat shock transcription factor 7 (HSTF7) identical to heat shock factor protein 7 (HSF7) SP:Q9T0D3 from 1rabidopsis thaliana]	SolycHsfB2b (manually curated)
Solyc08g083110	AT1G64660	Opposite	Cys/Met metabolism pyridoxal-phosphate-dependent enzyme family protein similar to SP|P13254 Methionine gamma-lyase (EC 4.4.1.11) (L-methioninase) {Pseudomonas putida}; contains Pfam profile PF01053: Cys/Met metabolism PLP-dependent enzyme	Cystathionine gamma-lyase (D2LF58_RHOVA)
Solyc09g005690	AT2G37440	Up	endonuclease/exonuclease/phosphatase family protein similar to inositol polyphosphate 5-phosphatase I (GI:10444261) and II (GI:10444263) 1rabidopsis thaliana]; contains Pfam profile PF03372: Endonuclease/Exonuclease/phosphatase family	Inositol-1 4 5-trisphosphate 5-Phosphatase-like protein (Q9M1W5_ARATH)
Solyc09g010940	AT5G02230	Up	haloacid dehalogenase-like hydrolase family protein contains InterPro accession IPR005834: Haloacid dehalogenase-like hydrolase	Pyrimidine 5&apos-nucleotidase (D5QKK7_METTR)
Solyc09g091030	AT3G23920	Up	beta-amylase; putative / 1;4-alpha-D-glucan maltohydrolase; putative similar to beta-amylase enzyme 1rabidopsis thaliana] GI:6065749; beta-amylase PCT-BMYI from 1Solanum tuberosum]; contains Pfam profile PF01373: Glycosyl hydrolase family 14	Beta-amylase 1 (manually curated)
Solyc10g005080	AT1G01060	Up	myb family transcription factor contains Pfam profile: PF00249 myb-like DNA-binding domain; identical to cDNA LATE ELONGATED HYPOCOTYL MYB transcription factor GI:3281845	Late elongated hypocotyl and circadian clock associated-1-like
Solyc10g007110	AT5G53970	Up	aminotransferase; putative similar to nicotianamine aminotransferase from Hordeum vulgare 1GI:6498122; GI:6469087]; contains Pfam profile PF00155 aminotransferase; classes I and II	Tyrosine aminotransferase (Q8GUE9_SOLSC)
Solyc10g079620	AT2G41250	Up	haloacid dehalogenase-like hydrolase family protein low similarity to SP|Q94915 Rhythmically expressed gene 2 protein (DREG-2) {Drosophila melanogaster}; contains InterPro accession IPR005834: Haloacid dehalogenase-like hydrolase	HAD superfamily (Subfamily IA) hydrolase TIGR02254 (D2C4L5_THENR)
Solyc10g084370	AT3G09600	Up	myb family transcription factor contains Pfam profile: PF00249 myb-like DNA-binding domain	MYB transcription factor (Fragment) (A1DR87_CATRO)
Solyc11g011170	AT1G66330	Up	senescence-associated family protein similar to senescence-associated protein (GI:12836895) 1Ipomoea batatas]	ATA15 protein (Q5K6K5_ARATH)
Solyc11g012850	AT1G44446	Up	chlorophyll a oxygenase (CAO) / chlorophyll b synthase identical to chlorophyll a oxygenase GI:5853117 from 1rabidopsis thaliana]; contains Pfam PF00355 Rieske 12Fe-2S] domain	Chlorophyllide a oxygenase (B6TZB6_MAIZE)
Solyc11g013450	AT1G21830	Down	expressed protein EST gb|T21171 comes from this gene	CAA30371.1 protein (Fragment) (Q9ST96_ORYSA)
Solyc11g065700	AT5G12840	Up	CCAAT-binding transcription factor (CBF-B/NF-YA) family protein contains Pfam profile: PF02045 CCAAT-binding transcription factor (CBF-B/NF-YA) subunit B	Nuclear transcription factor Y subunit A-1 (B6TAR1_MAIZE)
Solyc11g066060	AT3G12580	Up	heat shock protein 70; putative / HSP70; putative strong similarity to heat shock protein GI:425194 1Spinacia oleracea]	heat shock protein (B2D2G5_CAPSN)
Solyc12g014530	AT5G14760	Up	L-aspartate oxidase family protein similar to L-aspartate oxidase; Escherichia coli 1SP|P10902]; contains Pfam profiles PF00890 FAD binding domain; PF02910 Fumarate reductase/succinate dehydrogenase flavoprotein C-terminal domain	L-aspartate oxidase (D7M6M9_ARALY)
Solyc12g019740	AT1G08570	Up	thioredoxin family protein contains Pfam profile: PF00085 Thioredoxin; similar to ESTs gb|T46281; gb|R83933; gb|N65879; emb|F14466; gb|N96726; gb|AA042340; and emb|Z18150	Thioredoxin family protein (D7KIT3_ARALY)
Abbreviations
Sol	Solanum lycopersicum
AT	Arabidopsis thaliana
R	Red Light

## Sheet: Supp_Tab_4
Supplemental Table 4. Fold induction (FI) and fold repression (FR) values for WT and phyA mutants in A. thaliana (Tepperman et al., 2006) and S. lycopersicum. Grey highlighted genes show matching regulation in A. thaliana and S. lycopersicum. Red highlighted genes show opposite regulation in A. thaliana and S. lycopersicum.
*This comparison is between microarray data and RNA-seq data which have different scopes and are challenging to compare.
AT Gene ID	AT Wild-type FI	AT phyA FI	Sol Gene ID	Sol Wild-type FI	Sol phyA FI	Figure 1C Venn diagram sector	Module	AT Locus Description	Sol Locus Description
AT4G37760	2.28508	1.46723	Solyc00g085070	0.977359	0.951315	Not DE	grey	squalene monooxygenase; putative / squalene epoxidase; putative similar to SP|O65404 (SE 1;1); SP|O65402 (SE 1;2); SP|O65403 (SE 2)	Squalene monooxygenase (Q506K3_DATIN)
AT5G06530	2.54085	1.77096	Solyc01g006720	0.964956	1.58618	K	blue	ABC transporter family protein	ABC transporter G family member 22 (AB22G_ARATH)
AT4G29070	1.30264	1.07516	Solyc01g008780	1.11806	1.01967	Not DE	Not in top 8000	expressed protein	Phospholipase A22 (B9SJ74_RICCO)
AT2G46420	3.4369	1.83966	Solyc01g010520	1.04985	1.241	N	blue	expressed protein	Uncharacterized plant-specific domain TIGR01589 family protein (Q60CZ4_SOLDE)
AT1G14345	3.03618	1.96541	Solyc01g010640	1.128	1.23358	A	turquoise	expressed protein contains one transmembrane domain	Uncharacterized membrane protein (Q46JN3_PROMT)
AT5G49480	2.71913	1.29709	Solyc01g058720	0.880365	2.35518	K	blue	sodium-inducible calcium-binding protein (ACP1) / sodium-responsive calcium-binding protein (ACP1) identical to NaCl-inducible Ca2+-binding protein GI:2352828 from 1rabidopsis thaliana]	NaCl-inducible Ca2+-binding protein (O22368_ARATH)
AT4G15630	1.75105	1.12241	Solyc01g067330	1.76349	1.17262	D	Not in top 8000	integral membrane family protein contains TIGRFAM TIGR01569 : plant integral membrane protein TIGR01569; contains Pfam PF04535 : Domain of unknown function (DUF588)	UPF0497 membrane protein 4 (U4974_VITVI)
AT5G18670	1.82003	1.38911	Solyc01g067660	1.44457	1.01222	M	turquoise	beta-amylase; putative (BMY3) / 1;4-alpha-D-glucan maltohydrolase; putative almost identical to beta-amylase BMY3 GI:15149457 from 1rabidopsis thaliana]; identical to cDNA putative beta-amylase BMY3 (BMY3) GI:15149456	1,4-alpha-glucan-maltohydrolase (manually curated)
AT4G00050	2.43919	1.50289	Solyc01g090790	1.32336	1.93081	C	Not in top 8000	basic helix-loop-helix (bHLH) family protein contains Pfam profile: PF00010 helix-loop-helix DNA-binding domain	bHLH transcription factor (manually curated)
AT1G54740	1.87739	1.59012	Solyc01g098570	0.678565	1.59456	Not DE	Not in top 8000	expressed protein	Unknown Protein
AT1G09250	1.54631	0.85673	Solyc01g100660	0.987001	0.923218	Not DE	grey	expressed protein	Transcription factor (D7L4N5_ARALY)
AT5G02270	4.40195	1.58913	Solyc01g100850	1.06644	1.27708	G	Not in top 8000	ABC transporter family protein NBD-like protein POP; Arabidopsis thaliana; EMBL:AF127664	ABC transporter ATP-binding protein (Q88ZT3_LACPL)
AT1G09540	1.31058	1.09838	Solyc01g102340	1.051	1.27868	A	turquoise	myb family transcription factor (MYB61) contains PFAM profile: myb DNA-binding domain PF00249	R2R3MYB transcription factor 61 (manually curated)
AT4G10040	3.05657	1.60095	Solyc01g103220	0.913614	0.853466	A	turquoise	cytochrome c; putative similar to cytochrome c 1Pumpkin; Winter squash] SWISS-PROT:P00051	Cytochrome c (B6SKR4_MAIZE)
AT3G24500	2.21937	1.18209	Solyc01g104740	0.932463	1.77418	Not DE	blue	ethylene-responsive transcriptional coactivator; putative similar to ethylene-responsive transcriptional coactivator 1Lycopersicon esculentum] gi|5669634|gb|AAD46402	Multiprotein bridging factor 1 (C8C4P8_WHEAT)
AT5G64170	3.19721	2.14821	Solyc01g105120	3.33089	1.23674	D	turquoise	dentin sialophosphoprotein-related contains weak similarity to Swiss-Prot:Q9NZW4 dentin sialophosphoprotein precursor 1Homo sapiens]	Os01g0498200 protein (Fragment) (Q0JMJ0_ORYSJ)
AT5G64510	2.1466	1.07202	Solyc01g106470	2.54296	2.6307	Not DE	blue	expressed protein	Genomic DNA chromosome 5 P1 clone MUB3 (Q9FLG7_ARATH)
AT1G50020	2.01581	1.28166	Solyc01g106790	1.28597	1.57691	C	Not in top 8000	expressed protein	Tubulin alpha-6 chain (B6SR73_MAIZE)
AT1G17870	1.71651	0.99399	Solyc01g106820	1.02348	1.49794	F	Not in top 8000	expressed protein contains 6 transmembrane domains; similar to predicted metalloproteases	Peptidase M50 family (B6UET0_MAIZE)
AT4G15480	2.26952	1.09908	Solyc01g107560	0.791202	0.843176	A	pink	UDP-glucoronosyl/UDP-glucosyl transferase family protein contains Pfam profile: PF00201 UDP-glucoronosyl and UDP-glucosyl transferase	UDP-glucosyltransferase 1 (C6ZRH7_CAPAN)
AT2G21560	1.83746	1.40675	Solyc01g109800	1.06283	0.824191	J	Not in top 8000	expressed protein contains weak similarity to reticulocyte-binding protein 2 homolog A 1Plasmodium falciparum] gi|9754767|gb|AAF98066	Genomic DNA chromosome 5 TAC clone K1F13 (Q9FJZ5_ARATH)
AT4G34610	1.62901	1.08185	Solyc01g109980	1.12646	1.02985	Not DE	blue	homeodomain-containing protein similaritry to homeotic protein BEL1; Arabidopsis thaliana; PIR2:A57632	BEL1-like homeodomain protein 6 (BLH6_ARATH)
AT2G16430	1.53214	1.04069	Solyc01g110060	0.852301	1.00092	Not DE	turquoise	purple acid phosphatase (PAP10) identical to purple acid phosphatase (PAP10) GI:20257482 from 1rabidopsis thaliana]	Purple acid phosphatase (Q84KZ2_TOBAC)
AT2G21320	4.27174	1.84953	Solyc01g110370	1.31183	0.85256	Not DE	Not in top 8000	zinc finger (B-box type) family protein	Zinc finger protein CONSTANS-LIKE 3 (COL3_ARATH)
AT5G17300	7.0848	3.34608	Solyc02g036370	2.51241	1.15462	B	turquoise	myb family transcription factor similar to CCA1 1rabidopsis thaliana] GI:4090569; contains Pfam profile PF00249: Myb-like DNA-binding domain	Myb family transcription factor (manually curated)
AT3G27170	1.6532	1.03161	Solyc02g068080	1.07311	1.3942	N	black	chloride channel protein (CLC-b) identical to CLC-b chloride channel protein GB:CAA96058 from 1rabidopsis thaliana] (J. Biol. Chem. 271 (52); 33632-33638 (1996))	Voltage-gated chloride channel (Q96325_ARATH)
AT1G30040	1.53541	0.92565	Solyc02g070430	1.4199	0.570019	Not DE	Not in top 8000	gibberellin 2-oxidase / GA2-oxidase (GA2OX2) identical to GI:4678368 ga2ox2	Gibberellin 2-oxidase 1 (A7LCJ5_SOLTU)
AT2G20560	1.96756	1.10062	Solyc02g077670	0.824302	1.49776	F	brown	DNAJ heat shock family protein SP|Q9UDY4 DnaJ homolog subfamily B member 4 (Heat shock 40 kDa protein 1 homolog) {Homo sapiens}; contains Pfam profile PF00226: DnaJ domain	Chaperone protein dnaJ 2 (DNAJ2_ARATH)
AT1G11380	1.2629	0.9172	Solyc02g079390	1.31379	1.33108	N	pink	expressed protein contains Pfam profile PF04749: Protein of unknown function; DUF614	Uncharacterized Cys-rich domain (Q2HTU7_MEDTR)
AT5G54470	2.38907	1.21846	Solyc02g079430	0.955783	0.606739	F	brown	zinc finger (B-box type) family protein similar to unknown protein (pir||T05755)	CONSTANS-like zinc finger protein (D0EP04_SOYBN)
AT4G21320	1.21423	0.85513	Solyc02g079930	0.893312	1.2697	J	green	(2R)-phospho-3-sulfolactate synthase-related contains weak similarity to Swiss-Prot:Q57703 (2R)-phospho-3-sulfolactate synthase (PSL synthase) 1Methanococcus jannaschii]	phosphosulfolactate synthase (manually curated)
AT4G21870	2.54646	1.75964	Solyc02g080410	0.845351	0.73606	J	Not in top 8000	26.5 kDa class P-related heat shock protein (HSP26.5-P) contains Pfam profile: PF00011 Hsp20/alpha crystallin family: identified in Scharf; K-D.; et al;Cell Stress & Chaperones (2001) 6: 225-237.	class I heat shock protein (Q69BI7_CARPA)
AT3G51240	12.0277	2.68438	Solyc02g083860	0.950634	2.12785	K	blue	naringenin 3-dioxygenase / flavanone 3-hydroxylase (F3H) identical to GI:3790548	Flavanone 3-hydroxylase (A9ZMI9_TOBAC)
AT5G15310	2.07484	1.42481	Solyc02g088190	0.974443	1.32095	C	blue	myb family transcription factor contains PFAM profile: myb DNA-binding domain PF00249	MYB transcription factor (Q6R098_ARATH)
AT3G29200	1.55417	1.01864	Solyc02g088460	1.05313	1.12014	Not DE	turquoise	chorismate mutase; chloroplast (CM1) identical to chorismate mutase GB:Z26519 1SP|P42738] 1rabidopsis thaliana]	Chorismate mutase 1 (D2CSU4_PETHY)
AT3G50560	1.98154	1.08215	Solyc02g090540	1.40855	1.42371	A	turquoise	short-chain dehydrogenase/reductase (SDR) family protein contains INTERPRO family IPR002198 short-chain dehydrogenase/reductase (SDR) superfamily	Short-chain dehydrogenase/reductase family protein (D7LTG0_ARALY)
AT5G67030	2.71156	1.75682	Solyc02g090890	1.02416	1.02786	Not DE	pink	zeaxanthin epoxidase (ZEP) (ABA1) identical to GI:9857296 AtABA1; controls Pfam profiles PF01360: Monooxygenase and PF00498: FHA domain; identical to cDNA AtABA1; GI:9857295	zeaxanthin epoxidase (manually curated)
AT5G37790	2.23776	1.66034	Solyc02g091470	1.27114	0.963065	O	green	protein kinase family protein contains protein kinase domain; Pfam:PF00069	Serine/threonine protein kinase-like (Q9FGC3_ARATH)
AT5G67370	1.7536	1.10625	Solyc02g092700	1.13713	1.05354	Not DE	Not in top 8000	expressed protein similar to unknown protein (gb|AAC18972.1)	Ycf36 protein (D4ZSA0_SPIPL)
AT5G24120	25.1842	3.37421	Solyc03g007370	2.69767	6.45831	E	blue	RNA polymerase sigma subunit SigE (sigE) / sigma-like factor (SIG5) identical to RNA polymerase sigma subunit SigE 1rabidopsis thaliana] GI:4972299; sigma-like factor 1rabidopsis thaliana] GI:4033838; contains Pfam profiles PF04545: Sigma-70; region 4; PF04539: Sigma-70 region 3; PF04542: Sigma-70 region 2	RNA polymerase sigma factor (C7QR23_CYAP0)
AT4G27940	1.63073	1.15486	Solyc03g007430	1.17601	1.00629	G	Not in top 8000	mitochondrial substrate carrier family protein contains Pfam profile: PF00153 mitochondrial carrier protein	Mitochondrial carrier family (C1E2Y0_9CHLO)
AT5G52640	2.1038	0.86584	Solyc03g007890	0.855582	2.62774	C	brown	heat shock protein 81-1 (HSP81-1) / heat shock protein 83 (HSP83) nearly identical to SP|P27323 Heat shock protein 81-1 (HSP81-1) (Heat shock protein 83) {Arabidopsis thaliana}; contains Pfam profiles PF02518: ATPase; histidine kinase-; DNA gyrase B-; and HSP90-like domain protein; PF00183: Hsp90 protein	class 2 small heat shock protein Le-HSP17.6 (manually curated)
AT5G52510	2.49117	1.14331	Solyc03g025170	0.920605	1.16502	G	turquoise	scarecrow-like transcription factor 8 (SCL8)	gras10 (manually curated)
AT5G23760	1.64767	1.10756	Solyc03g025800	0.766652	0.99289	Not DE	Not in top 8000	heavy-metal-associated domain-containing protein Pfam profile PF00403: Heavy-metal-associated domain	Os03g0111400 protein (Fragment) (Q0DVV0_ORYSJ)
AT5G62020	1.38995	1.28104	Solyc03g026020	1.19383	0.961687	Not DE	turquoise	heat shock factor protein; putative (HSF6) / heat shock transcription factor; putative (HTSF6) identical to heat shock transcription factor 6 (HSF6) SP: Q9SCW4 from 1rabidopsis thaliana] ;contains Pfam profile: PF00447 HSF-type DNA-binding domain	SolycHsfB2a (manually curated)
AT4G25470	3.60638	1.01343	Solyc03g026270	0.380779	1.88926	Not DE	Not in top 8000	DRE-binding protein (DREB1C) / CRT/DRE-binding factor 2 (CBF2) identical to DREB1C GI:3738228 from 1rabidopsis thaliana]; DREB1C 1rabidopsis thaliana] GI:3660552; CRT/DRE binding factor 2 1rabidopsis thaliana] GI:4091984; contains Pfam profile PF00847: AP2 domain; identical to cDNA CRT/DRE binding factor 2 (CBF2) GI:4322227	Ethylene-responsive transcription factor 4 (ERF78_ARATH)
AT4G25480	2.25448	1.40265	Solyc03g026280	0.69301	1.25306	Not DE	Not in top 8000	DRE-binding protein (DREB1A) / CRT/DRE-binding factor 3 (CBF3) identical to DREB1A GI:3738224 from 1rabidopsis thaliana]; DREB1A 1rabidopsis thaliana] GI:3660548; CRT/DRE binding factor 3 1rabidopsis thaliana] GI:4091983; contains Pfam profile PF00847: AP2 domain; identical to cDNA CRT/DRE binding factor 3 (CBF3) GI:4322229	C-repeat binding factor 1 (manually curated)
AT3G57830	1.37764	1.04956	Solyc03g064010	0.971221	0.962969	Not DE	Not in top 8000	leucine-rich repeat transmembrane protein kinase; putative several receptor-like protein kinases	Receptor like kinase, RLK
AT5G24470	5.80006	3.494	Solyc03g081240	1.1099	1.57718	G	blue	pseudo-response regulator 5 (APRR5) identical to pseudo-response regulator 5 GI:10281006 from 1rabidopsis thaliana]	Pseudo response regulator (B9IDF0_POPTR)
AT3G02910	8.7728	2.66131	Solyc03g097230	1.13762	1.22048	Not DE	Not in top 8000	expressed protein contains Pfam domain PF03674: Uncharacterised protein family (UPF0131)	Protein containing AIG2-like domain (D9PJU0_9ZZZZ)
AT5G35970	2.53927	1.40391	Solyc03g097370	1.24485	1.50473	H	blue	DNA-binding protein; putative similar to SWISS-PROT:Q60560 DNA-binding protein SMUBP-2 (Immunoglobulin MU binding protein 2; SMUBP-2) 1Mesocricetus auratus]	DNA helicase-like (Q9FGC2_ARATH)
AT1G73480	3.2718	2.018	Solyc03g098020	1.18776	0.898672	A	turquoise	hydrolase; alpha/beta fold family protein low similarity to monoglyceride lipase from 1Homo sapiens] GI:14594904; 1Mus musculus] GI:2632162; contains Pfam profile PF00561: hydrolase; alpha/beta fold family	Hydrolase alpha/beta fold family protein (D7KRI7_ARALY)
AT1G18330	3.23233	2.22622	Solyc03g098320	8.84752	6.67783	I	blue	myb family transcription factor	MYB transcription factor (Fragment) (A1DR85_CATRO)
AT5G08050	1.69301	1.32624	Solyc03g115020	1.00572	1.16216	Not DE	yellow	expressed protein predicted protein; Arabidopsis thaliana	Unknown Protein; contains Interpro domain(s) IPR009500 Protein of unknown function DUF1118
AT1G74310	2.60186	0.77279	Solyc03g115230	0.966951	2.35804	C	brown	heat shock protein 101 (HSP101) identical to heat shock protein 101 GI:6715468 GB:AAF26423 from 1rabidopsis thaliana]	Solanum lycopersicum heat shock protein (manually curated)
AT1G72770	2.29172	1.61511	Solyc03g121880	1.24386	1.38638	I	black	protein phosphatase 2C P2C-HA / PP2C P2C-HA (P2C-HA) identical to protein phosphatase 2C (AtP2C-HA) GB:AJ003119 1rabidopsis thaliana] (Plant Mol. Biol. 38 (5); 879-883 (1998))	Protein phosphatase 2C (A5A6P8_WHEAT)
AT3G14200	2.1135	1.37945	Solyc03g123560	0.938899	1.54393	F	brown	DNAJ heat shock N-terminal domain-containing protein low similarity to SP|O75190|DJB6_HUMAN DnaJ homolog subfamily B member 6 (Heat shock protein J2) {Homo sapiens}; contains Pfam profile PF00226 DnaJ domain	Chaperone protein dnaJ (B4FBY1_MAIZE)
AT1G70000	1.7552	1.25911	Solyc04g005100	1.23696	1.16735	A	turquoise	DNA-binding family protein contains Pfam domains; PF00249: Myb-like DNA-binding domain and PF00098: Zinc knuckle	Myb transcription factor (A7UMB2_ROSHC)
AT1G15100	2.83622	1.65714	Solyc04g007500	1.04688	0.760709	J	Not in top 8000	zinc finger (C3HC4-type RING finger) family protein contains Pfam profile: PF00097 zinc finger; C3HC4 type (RING finger)	RING finger protein (Q22V07_TETTH)
AT1G48100	5.33338	1.62203	Solyc04g008230	1.62571	2.83648	C	Not in top 8000	glycoside hydrolase family 28 protein / polygalacturonase (pectinase)	Polygalacturonase (B6TYD6_MAIZE)
AT5G37360	2.05281	1.18487	Solyc04g050470	0.970651	1.17103	G	turquoise	expressed protein	Genomic DNA chromosome 5 P1 clone MNJ8 (Q9FHS9_ARATH)
AT5G64840	2.37157	1.35553	Solyc04g051800	1.04483	1.29716	C	blue	ABC transporter family protein	ABC transporter ATP-binding protein (D4ZPJ5_SPIPL)
AT2G21940	1.34627	0.89295	Solyc04g051860	1.03724	1.12996	Not DE	Not in top 8000	shikimate kinase; putative similar to shikimate kinase precursor from Lycopersicon esculentum 1SP|Q00497]; contains Pfam shikimate kinase domain PF01202	shikimate kinase precursor (manually curated)
AT2G21970	1.92173	1.34163	Solyc04g053130	1.2283	1.4103	C	turquoise	stress enhanced protein 2 (SEP2) nearly identical to stress enhanced protein 2; SEP2 (GI:7384980) 1rabidopsis thaliana]	LHC-related protein (D8SUY7_SELML)
AT1G44000	3.04857	1.37433	Solyc04g063240	0.884726	1.07075	A	purple	expressed protein	Senescence-inducible chloroplast stay-green protein 1 (B6SRJ2_MAIZE)
AT1G71810	1.97589	1.19439	Solyc04g072230	0.988646	1.11759	Not DE	Not in top 8000	ABC1 family protein contains Pfam domain; PF03109: ABC1 family	Uncharacterized aarF domain-containing protein kinase 1 (ADCK1_XENLA)
AT1G78070	2.31063	1.244	Solyc04g072890	0.923905	0.757656	J	turquoise	WD-40 repeat family protein contains Pfam profile PF00400: WD domain; G-beta repeat	WD-40 repeat family protein (D7KN06_ARALY)
AT1G78100	2.27276	1.19077	Solyc04g072930	1.01546	0.980872	Not DE	Not in top 8000	F-box family protein contains F-box domain Pfam:PF00646	F-box family protein (D7KV76_ARALY)
AT1G75100	2.40069	1.83218	Solyc04g080040	0.890589	1.49919	G	Not in top 8000	expressed protein low similarity to SP|O14976 Cyclin G-associated kinase (EC 2.7.1.-) {Homo sapiens}	UBA/TS-N domain protein (B6QFU5_PENMQ)
AT1G75460	2.64566	1.48882	Solyc04g080870	0.781579	1.20972	G	yellow	ATP-dependent protease La (LON) domain-containing protein weak similarity to SP|P36774 ATP-dependent protease La 2 (EC 3.4.21.53) {Myxococcus xanthus}; contains Pfam profile PF02190: ATP-dependent protease La (LON) domain	Peptidase S16 lon domain protein (D7E103_NOSA0)
AT1G76080	4.67776	1.74734	Solyc04g081970	0.651108	1.26162	D	yellow	thioredoxin family protein low similarity to thioredoxin (TRX) 1Fasciola hepatica] GI:6687568; contains Pfam profile PF00085: Thioredoxin	Thioredoxin (D8U146_VOLCA)
AT1G60590	1.90621	1.05415	Solyc05g005170	0.757716	1.47973	G	Not in top 8000	polygalacturonase; putative / pectinase; putative similar to polygalacturonase PG1 (GI:5669846); PG2 (GI:5669848) from 1Glycine max]; contains PF00295: Glycosyl hydrolases family 28 (polygalacturonases)	Polygalacturonase 2 (A8D0T9_ONCHC)
AT1G60190	2.68769	2.10719	Solyc05g005670	1.39313	1.14717	D	Not in top 8000	armadillo/beta-catenin repeat family protein / U-box domain-containing protein contains Pfam domain; PF00514: Armadillo/beta-catenin-like repeats and Pfam; PF04564: U-box domain	U-box domain-containing protein (D7LSY5_ARALY)
AT1G10370	2.26781	1.74716	Solyc05g006730	0	0	Not DE	Not in top 8000	glutathione S-transferase; putative (ERD9) similar to glutathione S-transferase TSI-1 1egilops tauschii] gi:2190992 gb:AAD10129; similar to ESTs gb|R29860; emb|Z29757; and emb|Z29758; identical to cDNA ERD9 mRNA for glutathione S-transferase; GI:15375407; glutathione S-transferase 1rabidopsis thaliana] GI:15375408	Glutathione S-transferase 3 (Q9SEK1_PAPSO)
AT2G02950	4.68327	1.73888	Solyc05g007480	1.19719	1.15042	A	Not in top 8000	phytochrome kinase substrate 1 (PKS1) identical to Swiss-Prot:Q9SWI1 phytochrome kinase substrate 1 1rabidopsis thaliana]	Phytochrome kinase substrate 1 (D7LQB9_ARALY)
AT3G55120	1.36771	1.22951	Solyc05g010320	0.858427	1.0558	Not DE	Not in top 8000	chalcone-flavanone isomerase / chalcone isomerase (CHI) identical to SP|P41088	Chalcone--flavonone isomerase (D7LV11_ARALY)
AT2G04030	1.86494	1.28028	Solyc05g010670	0.778488	1.03664	J	turquoise	heat shock protein; putative strong similarity to heat shock protein 1rabidopsis thaliana] GI:1906830; contains Pfam profiles PF02518: ATPase; histidine kinase-; DNA gyrase B-; and HSP90-like domain protein; PF00183: Hsp90 protein	Chaperone protein htpG (HTPG_MYXXD)
AT1G67360	2.13656	1.21378	Solyc05g015390	1.24144	1.33121	F	brown	rubber elongation factor (REF) family protein contains Pfam profile: PF05755 rubber elongation factor protein (REF)	REF-like stress related protein 1 (Q6XNP4_HEVBR)
AT2G39950	1.41918	0.88187	Solyc05g052630	1.10018	1.05903	Not DE	pink	expressed protein	Unknown Protein
AT2G47730	1.43353	1.01531	Solyc06g009020	1.00081	1.36178	F	brown	glutathione S-transferase 6 (GST6) identical to GB:X95295. Based on identical cDNA hits; the translation is now 40 AAs longer at the N-terminal; and start of exon2 is also corrected.	Glutathione S-transferase (A5YWI8_SOLCO)
AT2G47270	1.8413	1.46708	Solyc06g009510	1.76903	2.71905	L	Not in top 8000	expressed protein	Transcription factor bHLH151 (BH151_ARATH)
AT4G25640	1.5407	0.86083	Solyc06g036130	0.816589	1.22579	G	Not in top 8000	MATE efflux family protein similar to ripening regulated protein DDTFR18 1Lycopersicon esculentum] GI:12231296; contains Pfam profile PF01554: Uncharacterized membrane protein family	Multidrug resistance protein mdtK (MDTK_YERP3)
AT3G56080	2.20233	1.65619	Solyc06g051000	0	0	Not DE	Not in top 8000	dehydration-responsive protein-related similar to early-responsive to dehydration stress ERD3 protein 1rabidopsis thaliana] GI:15320410; contains Pfam profile PF03141: Putative methyltransferase	Dehydration-responsive family protein (D7LF23_ARALY)
AT2G40080	5.1041	3.0226	Solyc06g051660	0.816871	1.16077	Not DE	Not in top 8000	ELF4	ELF4-like protein (C6ZKH9_IPONI)
AT1G18810	2.12271	1.30586	Solyc06g069880	0.641246	0.435319	A	Not in top 8000	phytochrome kinase substrate-related contains weak similarity to Swiss-Prot:Q9SWI1 phytochrome kinase substrate 1 1rabidopsis thaliana]	Phytochrome kinase substrate 1 (D7LQB9_ARALY)
AT1G06040	3.24953	2.7008	Solyc06g073180	2.83434	3.23981	J	blue	zinc finger (B-box type) family protein / salt-tolerance protein (STO) identical to SP|Q96288 Salt-tolerance protein 1rabidopsis thaliana]; contains Pfam profile PF00643: B-box zinc finger	CONSTANS interacting protein 1 (manually curated)
AT4G26850	2.47252	1.37558	Solyc06g073320	1.24455	1.46957	H	blue	expressed protein	GDP-L-galactose phosphorylase 1
AT5G20070	4.65868	2.6044	Solyc06g075080	1.14859	1.22589	Not DE	blue	MutT/nudix family protein low similarity to SP|Q19427 NADH pyrophosphatase (EC 3.6.1.-) {Caenorhabditis elegans}; contains Pfam profile PF00293: NUDIX domain	NADH pyrophosphatase (D3NRP0_AZOS1)
AT2G28550	2.7856	1.63459	Solyc06g075510	1.09134	3.76829	K	blue	AP2 domain-containing transcription factor RAP2.7 (RAP2.7) nearly identical to AP2 domain transcription factor RAP2.7 (GI:2281639) 1rabidopsis thaliana]	ob27772-Solyc06g075510 (manually curated)
AT5G59400	2.05506	1.22703	Solyc06g076250	1.04288	1.06247	Not DE	Not in top 8000	expressed protein predicted protein; Arabidopsis thaliana	Genomic DNA chromosome 5 BAC clone F2O15 (Q9LTI9_ARATH)
AT5G59510	1.83966	1.1568	Solyc06g076320	0.942326	0.496869	C	red	expressed protein	DVL13 (Q8L7D0_ARATH)
AT1G07350	1.66037	1.07705	Solyc06g076670	1.208	2.29473	F	brown	transformer serine/arginine-rich ribonucleoprotein; putative similar to GB:Y09506 from 1Nicotiana tabacum] (Plant Mol. Biol. 35 (3); 261-269 (1997))	Nuclear SR-like RNA binding protein (A8JAT7_CHLRE)
AT3G25230	1.60354	0.82388	Solyc06g083190	0.922757	1.10337	A	red	peptidyl-prolyl cis-trans isomerase / FK506-binding protein (ROF1) identical to rotamase FKBP (ROF1) GB:U49453 1rabidopsis thaliana] (Mol. Gen. Genet. 252 (5); 510-517 (1996))	Peptidyl-prolyl cis-trans isomerase (Q86M29_BRUMA)
AT3G24750	1.56604	1.09361	Solyc06g083560	0.616808	0.569758	Not DE	Not in top 8000	expressed protein	Genomic DNA chromosome 3 TAC clone K7P8 (Q9LRY4_ARATH)
AT1G80130	2.558	1.17181	Solyc07g008210	1.75023	0.548522	Not DE	Not in top 8000	expressed protein	TPR domain protein (B6U810_MAIZE)
AT5G57360	1.39643	1.08188	Solyc07g017750	0	0	Not DE	Not in top 8000	F-box family protein / LOV kelch protein 1 (LKP1) E3 ubiquitin ligase SCF complex F-box subunit; identical to clock-associated PAS protein ZTL; ZEITLUPE GI:7839456; LOV kelch protein 1 GI:11610573; Adagio 1 GI:13487068 from 1rabidopsis thaliana]; contains Pfam profile PF01344: Kelch motif; identical to cDNA Adagio 1 (ADO1) GI:13487067; identical to cDNA LKP1 mRNA for LOV kelch protein 1; GI:11610…	Flavin-binding kelch domain F box protein (D7KVS5_ARALY)
AT3G17611	1.67473	1.25808	Solyc07g042930	1.10119	1.1956	Not DE	Not in top 8000	rhomboid family protein / zinc finger protein-related contains Pfam profiles PF01694: Rhomboid family; PF00641: Zn-finger in Ran binding protein and others	Rhomboid domain-containing protein 1 (B5X3K7_SALSA)
AT2G30520	8.94425	4.68264	Solyc07g043130	1.93817	4.4193	E	blue	signal transducer of phototropic response (RPT2) identical to RPT2 1rabidopsis thaliana] gi|6959488|gb|AAF33112	Os12g0117400 protein (Fragment) (Q0IQJ6_ORYSJ)
AT3G21760	2.40054	1.33142	Solyc07g043150	1.03503	1.12349	Not DE	turquoise	UDP-glucoronosyl/UDP-glucosyl transferase family protein contains Pfam profile: PF00201 UDP-glucoronosyl and UDP-glucosyl transferase	UDP-glucosyltransferase (A7M6U9_IPONI)
AT2G32540	2.01591	1.21414	Solyc07g051820	0.622234	0.533375	A	Not in top 8000	cellulose synthase family protein similar to cellulose synthase catalytic subunit from Arabidopsis thaliana 1gi:5230423]; cellulose synthase-5 from Zea mays 1gi:9622882]	Cellulose synthase (Q2HT12_MEDTR)
AT3G21690	1.62895	1.02299	Solyc07g052380	1.39278	0.817709	A	Not in top 8000	MATE efflux family protein similar to ripening regulated protein DDTFR18 1Lycopersicon esculentum] GI:12231296; contains Pfam profile: PF01554 MatE uncharacterized membrane protein family	Multidrug resistance protein mdtK (MDTK_YERP3)
AT3G21870	1.51609	1.25561	Solyc07g052610	0.895238	1.30039	G	Not in top 8000	cyclin family protein similar to cyclin 2 1Trypanosoma brucei] GI:7339572; cyclin 6 1Trypanosoma cruzi] GI:12005317; contains Pfam profile PF00134: Cyclin; N-terminal domain	Cyclin (D8UD80_VOLCA)
AT4G28290	2.41448	1.71095	Solyc07g054060	1.37311	2.22917	Not DE	blue	expressed protein	Unknown Protein
AT1G17100	2.51118	1.57588	Solyc07g061800	1.42066	10.4632	Not DE	Not in top 8000	SOUL heme-binding family protein similar to SOUL protein 1Mus musculus] GI:4886906; contains Pfam profile PF04832: SOUL heme-binding protein	Heme-binding protein 2 (B6T0C0_MAIZE)
AT1G78510	3.68926	1.80465	Solyc07g061990	1.03275	1.2042	A	blue	solanesyl diphosphate synthase (SPS) identical to solanesyl diphosphate synthase 1rabidopsis thaliana] GI:19911233; contains Pfam profile PF00348: Polyprenyl synthetase	Solanesyl diphosphate synthase (Q09IV6_SOLLC)
AT3G14770	1.57101	1.22174	Solyc07g062120	0.990057	1.08341	Not DE	Not in top 8000	nodulin MtN3 family protein similar to MtN3 GI:1619602 (root nodule development) from 1Medicago truncatula]	RAG1-activating protein 1 homolog (R1AP1_DROPS)
AT1G52870	1.64992	1.12298	Solyc07g063430	1.0188	1.16238	G	turquoise	peroxisomal membrane protein-related contains weak similarity to Swiss-Prot:Q07066 22 kDa peroxisomal membrane protein 1Rattus norvegicus]	Mpv17 protein (B0WWR6_CULQU)
AT4G27030	2.28375	1.09195	Solyc07g064410	2.71433	12.0311	J	Not in top 8000	expressed protein	Ubiquitin-conjugating enzyme-like protein (A4HBP2_LEIBR)
AT5G55970	1.54084	1.31348	Solyc07g065810	0.535192	1.39009	A	Not in top 8000	zinc finger (C3HC4-type RING finger) family protein contains Pfam profile: PF00097 zinc finger; C3HC4 type (RING finger)	RING finger family protein (D6RU92_SILLA)
AT5G56000	2.19354	1.16581	Solyc07g065840	1.05059	1.08134	A	red	heat shock protein 81-4 (HSP81-4) nearly identical to heat shock protein hsp81.4 1rabidopsis thaliana] GI:1906828; contains Pfam profiles PF02518: ATPase; histidine kinase-; DNA gyrase B-; and HSP90-like domain protein; PF00183: Hsp90 protein	molecular chaperone Hsp90-2 (manually curated)
AT4G31730	2.63378	2.30786	Solyc08g006520	1.35528	0.671727	F	Not in top 8000	expressed protein	GDU1 (B6TNE4_MAIZE)
AT4G17090	3.18433	1.45813	Solyc08g007130	1.6982	1.18899	Not DE	Not in top 8000	beta-amylase (CT-BMY) / 1;4-alpha-D-glucan maltohydrolase identical to beta-amylase enzyme GI:6065749 from 1rabidopsis thaliana]	Beta-amylase 8 (D7MC27_ARALY)
AT1G16720	2.95487	1.57328	Solyc08g016080	1.67921	3.18388	E	blue	expressed protein	NAD-dependent epimerase/dehydratase (B3ECK3_CHLL2)
AT5G11260	5.79385	2.67288	Solyc08g061130	1.38808	9.15496	H	blue	bZIP protein HY5 (HY5) identical to HY5 protein GI:2251085 from 1rabidopsis thaliana]	Transcription factor HY5 (B6UHC7_MAIZE)
AT2G26150	2.37426	0.99651	Solyc08g062960	0.850319	1.68677	C	brown	heat shock transcription factor family protein contains Pfam profile: PF00447 HSF-type DNA-binding domain	SolycHsfA2 (manually curated)
AT4G33040	1.94036	1.32143	Solyc08g062970	1.07976	1.03223	Not DE	Not in top 8000	glutaredoxin family protein contains INTERPRO Domain IPR002109; Glutaredoxin (thioltransferase)	Glutaredoxin (B9H2P7_POPTR)
AT5G24850	5.30577	1.46724	Solyc08g074270	1.43013	2.21537	H	blue	cryptochrome dash (CRYD) nearly identical to cryptochrome dash 1rabidopsis thaliana] GI:28971609; similar to Deoxyribodipyrimidine photolyase (DNA photolyase) (Photoreactivating enzyme)(SP:Q55081){Synechocystis sp.}	Cryptochrome 3
AT1G31350	1.74449	0.95358	Solyc08g074660	0	0	Not DE	Not in top 8000	F-box family protein similar to hypothetical protein GB:AAF24593 GI:6692128 from 1rabidopsis thaliana] ; similar to SKP1 interacting partner 2 (SKIP2) TIGR_Ath1:At5g67250	F-box/kelch-repeat protein At3g27150 (FBK70_ARATH)
AT1G32690	3.05101	1.3834	Solyc08g076870	0.967808	0.919304	Not DE	Not in top 8000	expressed protein similar to hypothetical protein GB:AAC61817 GI:3668085 from 1rabidopsis thaliana]	Unknown Protein
AT1G12240	1.84876	1.25261	Solyc08g079080	0.960178	0.621474	K	blue	beta-fructosidase (BFRUCT4) / beta-fructofuranosidase / invertase; vacuolar identical to beta-fructosidase GI:1871503 from 1rabidopsis thaliana]; contains Pfam profile PF00251:Glycosyl hydrolases family 32; identical to cDNA beta-fructosidase (vacuolar form) GI:1321683; similar to SP:Q43857	Lycopersicon esculentum invertase 9 (manually curated)
AT1G12250	1.51417	1.21352	Solyc08g079110	0.814261	1.12699	G	yellow	thylakoid lumenal protein-related weak similarity to SP|O22160 Thylakoid lumenal 15 kDa protein; chloroplast precursor (p15) {Arabidopsis thaliana}; contains Pfam profile PF00805: Pentapeptide repeats (8 copies)	Pentapeptide repeat (Q4C7L8_CROWT)
AT4G11660	1.66098	1.14961	Solyc08g080540	1.66011	4.95177	I	brown	heat shock factor protein 7 (HSF7) / heat shock transcription factor 7 (HSTF7) identical to heat shock factor protein 7 (HSF7) SP:Q9T0D3 from 1rabidopsis thaliana]	SolycHsfB2b (manually curated)
AT4G11570	2.19492	1.31753	Solyc08g081030	1.16118	1.40089	A	Not in top 8000	haloacid dehalogenase-like hydrolase family protein similar to genetic modifier 1Zea mays] GI:10444400; contains InterPro accession IPR005834: Haloacid dehalogenase-like hydrolase	HAD-superfamily hydrolase subfamily IA (D9WQP9_STRHY)
AT1G64500	7.9718	1.75044	Solyc08g082590	1.24594	1.19328	A	turquoise	glutaredoxin family protein	Glutaredoxin family protein (D7KS91_ARALY)
AT2G36885	1.39254	1.23149	Solyc09g008270	0.932401	1.2445	Not DE	grey	expressed protein	Unknown Protein
AT5G03555	2.74142	1.72066	Solyc09g008550	0.892107	1.05415	A	Not in top 8000	permease; cytosine/purines; uracil; thiamine; allantoin family protein contains Pfam PF02133: permease; cytosine/purines; uracil; thiamine; allantoin family	NCS1 family transporter cytosine/purines/uracil/thiamine/allantoin (A4RZF3_OSTLU)
AT3G51750	1.78126	1.11659	Solyc09g015450	1.36118	0.990168	Not DE	Not in top 8000	expressed protein	Unknown Protein
AT5G58760	2.16758	1.5034	Solyc09g031610	0.850955	1.01043	Not DE	Not in top 8000	transducin family protein / WD-40 repeat family protein contains 4 WD-40 repeats (PF00400); damage-specific DNA binding protein 2 (GI:10798819) 1Homo sapiens]	DAMAGED DNA BINDING PROTEIN1 (manually curated)
AT3G07360	2.19163	1.21652	Solyc09g056450	0.970722	0.971386	A	turquoise	armadillo/beta-catenin repeat family protein / U-box domain-containing protein contains Pfam domain; PF00514: Armadillo/beta-catenin-like repeats and Pfam; PF04564: U-box domain	U-box domain-containing protein (D7KBV1_ARALY)
AT3G07090	1.904	1.21422	Solyc09g061310	1.16531	1.52807	F	brown	expressed protein	PPPDE peptidase domain containing 2a (Q6PC81_DANRE)
AT5G44110	20.3267	3.61628	Solyc09g066470	1.13898	1.66633	C	blue	ABC transporter family protein	Cobalt import ATP-binding protein CbiO 2 (CBIO2_STRPF)
AT4G02920	1.699	1.03083	Solyc09g072990	0.905086	1.14719	Not DE	green	expressed protein	Unknown Protein
AT2G32120	1.37631	0.8438	Solyc09g075950	0.892011	1.27593	Not DE	Not in top 8000	heat shock protein 70 family protein / HSP70 family protein similar to SP|P22953 Heat shock cognate 70 kDa protein 1 (Hsc70.1) {Arabidopsis thaliana}; contains InterPro accession IPR001023: Heat shock protein Hsp70	Heat shock protein 1 (B6SXY0_MAIZE)
AT3G22840	10.9531	4.93053	Solyc09g082690	1.52306	27.9554	Not DE	blue	chlorophyll A-B binding family protein / early light-induced protein (ELIP) identical to early light-induced protein; ELIP 1rabidopsis thaliana] GI:1872544; contains Pfam profile: PF00504 chlorophyll A-B binding protein; identical to cDNA early light-induced protein GI:1872543	superoxide dismutase (manually curated)
AT4G14550	1.34932	0.9188	Solyc09g083290	1.11155	0.900543	Not DE	yellow	auxin-responsive AUX/IAA family protein identical to IAA14 (GI:972931) 1rabidopsis thaliana]; similar to SP|Q38825 Auxin-responsive protein IAA7 (Indoleacetic acid-induced protein 7) {Arabidopsis thaliana}	auxin-regulated IAA24 (manually curated)
AT3G23410	1.32432	0.95248	Solyc09g090350	1.05317	1.04298	Not DE	grey	alcohol oxidase-related similar to long chain fatty alcohol oxidase from Candida cloacae 1GI:6983581]; Candida tropicalis 1GI:6983594]	Oxidoreductase (B6SXM3_MAIZE)
AT3G23530	3.23918	1.08318	Solyc09g090510	1.01757	1.41514	K	blue	cyclopropane fatty acid synthase; putative / CPA-FA synthase; putative similar to cyclopropane synthase 1Sterculia foetida] GI:21069167; contains Pfam profiles PF02353: Cyclopropane-fatty-acyl-phospholipid synthase; PF01593: amine oxidase; flavin-containing	Cyclopropane-fatty-acyl-phospholipid synthase (C7LRK7_DESBD)
AT3G23920	2.28686	1.47325	Solyc09g091030	1.69351	1.36871	I	black	beta-amylase; putative / 1;4-alpha-D-glucan maltohydrolase; putative similar to beta-amylase enzyme 1rabidopsis thaliana] GI:6065749; beta-amylase PCT-BMYI from 1Solanum tuberosum]; contains Pfam profile PF01373: Glycosyl hydrolase family 14	Beta-amylase 1 (manually curated)
AT3G24190	2.06327	1.43516	Solyc09g091580	1.2331	2.12684	C	blue	ABC1 family protein contains Pfam domain; PF03109: ABC1 family	Uncharacterized aarF domain-containing protein kinase 1 (ADCK1_CHICK)
AT1G01060	2.55494	1.60645	Solyc10g005080	4.61229	0.934961	M	green	myb family transcription factor contains Pfam profile: PF00249 myb-like DNA-binding domain; identical to cDNA LATE ELONGATED HYPOCOTYL MYB transcription factor GI:3281845	Late elongated hypocotyl and circadian clock associated-1-like
AT1G42550	1.66717	1.24644	Solyc10g006330	0.95937	1.28909	A	blue	expressed protein	Unknown Protein
AT5G53970	1.63985	1.24266	Solyc10g007110	1.53731	1.07527	O	Not in top 8000	aminotransferase; putative similar to nicotianamine aminotransferase from Hordeum vulgare 1GI:6498122; GI:6469087]; contains Pfam profile PF00155 aminotransferase; classes I and II	Tyrosine aminotransferase (Q8GUE9_SOLSC)
AT4G03400	4.67749	1.60754	Solyc10g008520	0.879862	0.878959	A	turquoise	auxin-responsive GH3 family protein similar to auxin-responsive GH3 product 1Glycine max] GI:18591; contains Pfam profile PF03321: GH3 auxin-responsive promoter	Auxin-responsive GH3-like (Q0GUM1_ARATH)
AT2G46340	5.77078	2.95169	Solyc10g011690	1.01745	1.02951	Not DE	Not in top 8000	phytochrome A supressor spa1 (SPA1) identical to phytochrome A supressor spa1 (GI:4809171) 1rabidopsis thaliana]; contains 8 WD-40 repeats (Pfam PF00400) (1 weak)	WD-repeat protein (Q7ND80_GLOVI)
AT2G02410	2.23426	1.09756	Solyc10g044840	1.04417	1.09021	G	turquoise	expressed protein	PIN domain containing protein (Yacp-like protein) (C7TLS1_LACRL)
AT3G08720	2.11111	1.06535	Solyc10g074930	1.02436	0.956222	Not DE	Not in top 8000	serine/threonine protein kinase (PK19)	Protein kinase 2 (D3BIR2_POLPA)
AT3G57040	1.53918	0.97094	Solyc10g079600	0.863216	0.827431	A	red	two-component responsive regulator / response reactor 4 (RR4) identical to responce reactor4 GI:3273202 from 1rabidopsis thaliana]; contains Pfam profile: PF00072 response regulator receiver domain	Response regulator 6 (Q9FRY9_MAIZE)
AT2G41250	2.718	1.471	Solyc10g079620	1.43399	0.958648	D	turquoise	haloacid dehalogenase-like hydrolase family protein low similarity to SP|Q94915 Rhythmically expressed gene 2 protein (DREG-2) {Drosophila melanogaster}; contains InterPro accession IPR005834: Haloacid dehalogenase-like hydrolase	HAD superfamily (Subfamily IA) hydrolase TIGR02254 (D2C4L5_THENR)
AT3G52360	2.0013	1.5069	Solyc10g081690	1.36377	0.335282	Not DE	Not in top 8000	expressed protein	Unknown Protein
AT5G17050	3.97997	1.37147	Solyc10g083440	1.06938	3.96895	C	blue	UDP-glucoronosyl/UDP-glucosyl transferase family protein similar to UDP glucose:flavonoid 3-o-glucosyltransferase; Vitis vinifera; EMBL:AF000372	UDP flavonoid 3-O-glucosyltransferase (Fragment) (B5AIT4_IPOTF)
AT2G37970	2.93082	1.86012	Solyc10g085040	1.71913	1.07096	Not DE	Not in top 8000	SOUL heme-binding family protein weak similarity to SOUL protein 1Mus musculus] GI:4886906; contains Pfam profile PF04832: SOUL heme-binding protein	Soul heme-binding family protein (D7LKR5_ARALY)
AT5G23730	4.42138	1.38986	Solyc11g005190	1.79883	4.54469	A	Not in top 8000	transducin family protein / WD-40 repeat family protein contains similarity to photomorphogenesis repressor protein; contains Pfam PF00400: WD domain; G-beta repeat (5 copies)	WD-40 repeat protein (B7K999_CYAP7)
AT3G44110	1.39285	1.08994	Solyc11g006460	1.14893	1.08331	Not DE	turquoise	DNAJ heat shock protein; putative (J3) identical to AtJ3 1rabidopsis thaliana] GI:2641638; strong similarity to several plant DnaJ proteins from PGR; contains Pfam profiles PF00226 DnaJ domain; PF00684 DnaJ central domain (4 repeats); PF01556 DnaJ C terminal region	DNAJ chaperone (B0W7V8_CULQU)
AT1G66330	2.88793	1.41253	Solyc11g011170	1.29746	1.21488	M	turquoise	senescence-associated family protein similar to senescence-associated protein (GI:12836895) 1Ipomoea batatas]	ATA15 protein (Q5K6K5_ARATH)
AT1G44446	2.3365	1.70973	Solyc11g012850	1.90227	1.25881	M	turquoise	chlorophyll a oxygenase (CAO) / chlorophyll b synthase identical to chlorophyll a oxygenase GI:5853117 from 1rabidopsis thaliana]; contains Pfam PF00355 Rieske 12Fe-2S] domain	Chlorophyllide a oxygenase (B6TZB6_MAIZE)
AT3G12580	2.83441	0.89981	Solyc11g066060	1.38638	1.4303	E	brown	heat shock protein 70; putative / HSP70; putative strong similarity to heat shock protein GI:425194 1Spinacia oleracea]	heat shock protein (B2D2G5_CAPSN)
AT3G21670	3.98387	1.40923	Solyc12g006050	1.7193	4.75987	K	blue	nitrate transporter (NTP3) nearly identical to nitrate transporter 1rabidopsis thaliana] GI:4490323; contains Pfam profile: PF00854 POT family	Nitrate transporter (Q8LG02_ARATH)
AT4G14540	1.40229	1.05683	Solyc12g006120	1.06608	3.53329	C	blue	CCAAT-box binding transcription factor subunit B (NF-YB) (HAP3 ) (AHAP3) family contains Pfam PF00808 : Histone-like transcription factor (CBF/NF-Y) and archaeal histone; similar to LEC1-like protein (GI:22536010) 1Phaseolus coccineus]	Nuclear transcription factor Y subunit B-3 (B6SUG8_MAIZE)
AT2G42620	1.52164	1.12812	Solyc12g010900	1.11044	0.927698	J	Not in top 8000	F-box family protein (ORE9) E3 ubiquitin ligase SCF complex F-box subunit; identical to F-box containing protein ORE9 GI:15420162 from 1rabidopsis thaliana]	MAX2-like protein (Fragment) (B6VC85_PONTR)
AT1G08570	1.87732	1.60821	Solyc12g019740	1.35569	1.57058	E	blue	thioredoxin family protein contains Pfam profile: PF00085 Thioredoxin; similar to ESTs gb|T46281; gb|R83933; gb|N65879; emb|F14466; gb|N96726; gb|AA042340; and emb|Z18150	Thioredoxin family protein (D7KIT3_ARALY)
AT5G19850	2.11662	1.55514	Solyc12g098660	1.11835	1.6427	K	Not in top 8000	hydrolase; alpha/beta fold family protein low similarity to hydrolase 1Terrabacter sp. DBF63] GI:14196240; contains Pfam profile PF00561: hydrolase; alpha/beta fold family	Hydrolase alpha/beta fold family protein (D7LZC3_ARALY)
AT Gene ID	AT Wild-type FR	AT phyA FR	Sol Gene ID	Sol Wild-type FR	Sol phyA FR	Figure 1C Venn diagram sector	Module	AT Locus Description
AT1G14870	1.29911	0.95749	Solyc01g005470	0.613815	1.09965	A	Not in top 8000	expressed protein similar to PGPS/D12 1Petunia x hybrida] GI:4105794; contains Pfam profile PF04749: Protein of unknown function; DUF614	Cell number regulator 10 (D9HP26_MAIZE)
AT1G02640	1.86107	1.61304	Solyc01g079570	1.34827	1.48177	K	pink	glycosyl hydrolase family 3 protein similar to beta-xylosidase GB:Z84377 GI:2102655 from 1spergillus niger]	Beta xylosidase (Q6RXY3_FRAAN)
AT2G47440	1.28483	1.23246	Solyc01g079580	0.906172	1.1067	G	turquoise	DNAJ heat shock N-terminal domain-containing protein contains Pfam profiles PF00226: DnaJ domain; PF00515: TPR Domain; similar to GP|2104534|AF001308 (T10M13.11)	DNAJ heat shock N-terminal domain-containing protein (D7LGN0_ARALY)
AT1G02660	1.28241	0.87293	Solyc01g079600	1.18647	0.879444	G	Not in top 8000	lipase class 3 family protein contains Pfam profile PF01764: Lipase	Lipase (C1FIH0_9CHLO)
AT2G44740	1.96965	1.52362	Solyc01g089850	1.12262	1.77148	F	red	cyclin family protein similar to cyclin 2 1Trypanosoma brucei] GI:7339572; cyclin 6 1Trypanosoma cruzi] GI:12005317; contains Pfam profile PF00134: Cyclin; N-terminal domain	Cyclin-dependent protein kinase regulator Pho80 (B6QI37_PENMQ)
AT3G45970	1.45641	1.28414	Solyc01g112000	1.03543	1.09219	Not DE	Not in top 8000	expansin family protein (EXPL1)	expansin-like protein precursor 1 (manually curated)
AT5G23210	1.25671	0.98907	Solyc02g014830	1.2225	1.05803	Not DE	Not in top 8000	serine carboxypeptidase S10 family protein similar to Serine carboxypeptidase II chains A and B (SP:P08819) (EC 3.4.16.6) 1Triticum aestivum (Wheat)];	Serine carboxypeptidase (A6XH04_ARATH)
AT4G19690	1.31855	1.04382	Solyc02g069200	0.976917	3.59934	Not DE	Not in top 8000	iron-responsive transporter (IRT1) identical to Fe(II) transport protein 1rabidopsis thaliana] gi|1353266|gb|AAB01678; member of the Zinc (Zn2+)-Iron (Fe2+) permease (ZIP) family; PMID:11500563	iron-regulated transporter 1 (manually curated)
AT1G28440	1.31492	1.2712	Solyc02g077630	0.922768	0.918321	Not DE	turquoise	leucine-rich repeat transmembrane protein kinase; putative similar to receptor kinase GI:4105699 from 1rabidopsis thaliana]	Receptor like kinase, RLK
AT5G44680	1.64935	0.97861	Solyc02g082120	1.20029	1.24693	N	brown	methyladenine glycosylase family protein similar to SP|P05100 DNA-3-methyladenine glycosylase I (EC 3.2.2.20) (3-methyladenine-DNA glycosylase I; constitutive) {Escherichia coli}; contains Pfam profile PF03352: Methyladenine glycosylase	DNA-3-methyladenine glycosylase I (B6TPB7_MAIZE)
AT1G13280	1.46408	1.3216	Solyc02g085730	0.990699	0.786105	N	grey	allene oxide cyclase family protein similar to ERD12 1GI:15320414]; allene oxide cyclase GI:8977961 from 1Lycopersicon esculentum]; contains Pfam profile PF06351: Allene oxide cyclase	allene oxide cyclase (manually curated)
AT4G25420	1.41567	0.7018	Solyc03g006880	1.75403	3.67007	I	Not in top 8000	gibberellin 20-oxidase identical to GI:1109695	gibberellin 20-oxidase-1 (manually curated)
AT1G11545	1.28083	1.29524	Solyc03g031800	1.17236	1.44752	N	black	xyloglucan:xyloglucosyl transferase; putative / xyloglucan endotransglycosylase; putative / endo-xyloglucan transferase; putative similar to endo-xyloglucan transferase GI:2244732 from 1Gossypium hirsutum]	Xyloglucan endotransglucosylase/hydrolase 1 (C0IRG0_9ERIC)
AT5G50915	1.4403	1.23846	Solyc03g097820	0.993273	1.28858	J	Not in top 8000	basic helix-loop-helix (bHLH) family protein contains Pfam profile: PF00010 helix-loop-helix DNA-binding domain	Transcription factor (D6MKM4_9ASPA)
AT1G51940	2.20391	1.97384	Solyc03g121050	1.07745	1.39621	K	black	protein kinase family protein / peptidoglycan-binding LysM domain-containing protein contains protein kinases ATP-binding region signature; PROSITE:PS00107	Receptor-like kinase (C0SW32_SOYBN)
AT1G17430	1.55426	1.47687	Solyc03g123390	0.774311	1.1957	Not DE	green	hydrolase; alpha/beta fold family protein low similarity to SP|Q02104 Lipase 1 precursor (EC 3.1.1.3) (Triacylglycerol lipase) {Psychrobacter immobilis}; contains Pfam profile PF00561: hydrolase; alpha/beta fold family	Hydrolase (Q4PSG2_ARATH)
AT2G01770	1.77548	1.03846	Solyc04g008060	1.30772	1.0456	J	Not in top 8000	integral membrane family protein contains integral membrane protein domain; Pfam:PF01988	Vacuolar iron transporter Ccc1 (C5GIS5_AJEDR)
AT5G10120	1.78592	1.2718	Solyc04g054840	3.63262	1.4912	Not DE	Not in top 8000	ethylene insensitive 3 family protein contains Pfam profile: PF04873 ethylene insensitive 3	Ethylene insensitive 3 class transcription factor (D5L144_MALDO)
AT4G08950	4.96918	4.19044	Solyc04g074450	1.04166	1.42658	Not DE	brown	phosphate-responsive protein; putative (EXO) similar to phi-1 (phosphate-induced gene) 1Nicotiana tabacum] GI:3759184; contains Pfam profile PF04674: Phosphate-induced protein 1 conserved region	Phi-1 protein (Fragment) (Q4LAX0_CAPCH)
AT1G10150	1.30827	1.04343	Solyc04g077590	0.910023	1.16483	J	Not in top 8000	expressed protein similar to ESTs gb|T20511; gb|T45308; gb|H36493; and gb|AA651176	Phloem protein (Fragment) (C6FDB1_9CONI)
AT1G75900	1.29224	1.21353	Solyc04g081770	0.93176	0.661938	F	Not in top 8000	family II extracellular lipase 3 (EXL3) EXL3 (PMID:11431566); similar to anter-specific proline-rich protein (APG) SP:P40602 1rabidopsis thaliana]	GDSL esterase/lipase At5g42170 (GDL90_ARATH)
AT1G10550	1.70156	1.27248	Solyc05g005680	0.938746	1.4975	G	Not in top 8000	xyloglucan:xyloglucosyl transferase; putative / xyloglucan endotransglycosylase; putative / endo-xyloglucan transferase; putative similar to endoxyloglucan transferase related protein EXGT-A3 GI:2154609 from 1rabidopsis thaliana]	Xyloglucan endotransglucosylase/hydrolase 2 (D5HP44_9ROSA)
AT1G69040	1.45311	1.35406	Solyc05g011920	1.29002	1.19981	Not DE	grey	ACT domain containing protein (ACR4) low similarity to uridylyltransferase 1Gluconacetobacter diazotrophicus] GI:17226253; contains Pfam profile PF01842: ACT domain	ACT domain-containing protein (D7M3X3_ARALY)
AT1G70560	1.46197	1.37441	Solyc05g031600	1.0955	1.20362	Not DE	Not in top 8000	alliinase C-terminal domain-containing protein contains Pfam profiles: PF04864 allinase C-terminal domain; PF04863 alliinase EGF-like domain	Alliinase (Fragment) (Q94EJ8_ALLFI)
AT3G16490	1.64405	1.10168	Solyc06g066430	1.1901	1.28807	C	blue	calmodulin-binding family protein contains IQ calmodulin-binding motif; Pfam:PF00612	Calmodulin-binding family protein (Q9ZU28_ARATH)
AT3G52500	1.45265	1.00001	Solyc06g074000	1.15354	1.01868	G	Not in top 8000	aspartyl protease family protein contains Pfam PF00026: eukaryotic aspartyl protease	Aspartic proteinase nepenthesin-2 (B6SJT4_MAIZE)
AT1G10070	1.25353	1.0567	Solyc07g021630	0.985748	1.21134	J	Not in top 8000	branched-chain amino acid aminotransferase 2 / branched-chain amino acid transaminase 2 (BCAT2) identical to SP|Q9M439 Branched-chain amino acid aminotransferase 2; chloroplast precursor (EC 2.6.1.42) (Atbcat-2) {Arabidopsis thaliana}; contains Pfam profile: PF01063 aminotransferase class IV	SlBCAT2 (manually curated)
AT3G14370	1.35365	0.95946	Solyc07g056400	0.969062	1.88463	K	blue	protein kinase family protein contains protein kinase domain; Pfam:PF00069	Ribosomal protein S6 kinase alpha-6 (KS6A6_HUMAN)
AT5G55050	1.2799	1.3599	Solyc07g064730	0	0	Not DE	Not in top 8000	GDSL-motif lipase/hydrolase family protein similar to family II lipases EXL3 GI:15054386; EXL1 GI:15054382; EXL2 GI:15054384 from 1rabidopsis thaliana]; contains Pfam profile PF00657: GDSL-like Lipase/Acylhydrolase	GDSL esterase/lipase At5g55050 (GDL87_ARATH)
AT2G31980	1.69615	1.20725	Solyc09g097850	1.01831	1.74648	Not DE	turquoise	cysteine proteinase inhibitor-related contains similarity to extracellular insoluble cystatin GI:2204077 from 1Daucus carota]	Cysteine proteinase inhibitor (A7L2Z3_GOSHI)
AT1G09570	1.27656	1.58898	Solyc10g044670	0.911529	1.31431	C	turquoise	phytochrome A (PHYA) identical to SP|P14712 Phytochrome A {Arabidopsis thaliana}	phytochrome A (manually curated)
AT2G01610	1.48765	1.23331	Solyc10g076730	0.915802	1.2833	Not DE	Not in top 8000	invertase/pectin methylesterase inhibitor family protein low similarity to SP|Q42534 Pectinesterase 2 precursor (EC 3.1.1.11) (Pectin methylesterase 2) (PE 2) {Arabidopsis thaliana}; contains Pfam profile PF04043: Plant invertase/pectin methylesterase inhibitor	Pectinesterase (A9NW72_PICSI)
AT5G13870	1.49424	1.0397	Solyc11g040140	0.920341	1.55088	A	turquoise	xyloglucan:xyloglucosyl transferase / xyloglucan endotransglycosylase / endo-xyloglucan transferase (EXGT-A4) identical to endoxyloglucan transferase EXGT-A4 GI:5533315 from 1rabidopsis thaliana]	Xyloglucan endotransglucosylase/hydrolase 5 (C0IRG4_ACTDE)
AT1G09750	1.24171	0.84822	Solyc12g087940	1.16947	0.934571	A	yellow	chloroplast nucleoid DNA-binding protein-related contains Pfam profile PF00026: Eukaryotic aspartyl protease;b similar to CND41; chloroplast nucleoid DNA binding protein (GI:2541876) 1Nicotiana tabacum]	Aspartic proteinase nepenthesin-1 (B6TE66_MAIZE)
Abbreviations
AT	Arabidopsis thaliana
Sol	Solanum lycopersicum
FI	Fold induction in expression after 60 minutes R
FR	Fold repression in expression after 60 minutes R
DE	Differentially expressed

## Sheet: Supp_Tab_5
Supplemental Table 5. All significant GO results for each comparison in DETs and DEPs (p < 0.05) using the weighted model in topGO and Fisher's Exact Test.
All WT-D vs. WT-R DETs
Biological Process GO enrichment								Molecular Function GO enrichment								Cellular Component GO enrichment
	GO.ID	Term	Annotated	Significant	Expected	p-value			GO.ID	Term	Annotated	Significant	Expected	p-value			GO.ID	Term	Annotated	Significant	Expected	p-value
1	GO:0018298	protein-chromophore linkage	45	6	0.9	0.00026		1	GO:0052716	hydroquinone:oxygen oxidoreductase activ...	22	4	0.45	0.00097		1	GO:0009570	chloroplast stroma	125	18	2.79	2.3e-10
2	GO:0009808	lignin metabolic process	30	5	0.6	0.00029		2	GO:0015250	water channel activity	45	5	0.93	0.00225		2	GO:0071953	elastic fiber	2	2	0.04	0.00049
3	GO:0006633	fatty acid biosynthetic process	116	9	2.32	0.00053		3	GO:0015254	glycerol channel activity	45	5	0.93	0.00225		3	GO:0005887	integral component of plasma membrane	229	13	5.11	0.00177
4	GO:0009765	photosynthesis, light harvesting	35	5	0.7	0.00061		4	GO:0004722	protein serine/threonine phosphatase act...	97	7	2	0.00391		4	GO:0009536	plastid	671	39	14.97	0.00211
5	GO:0009992	cellular water homeostasis	45	5	0.9	0.00197		5	GO:0020037	heme binding	408	17	8.43	0.00476		5	GO:0009534	chloroplast thylakoid	178	10	3.97	0.00636
6	GO:0015793	glycerol transport	45	5	0.9	0.00197		6	GO:0016836	hydro-lyase activity	34	4	0.7	0.00506		6	GO:0009579	thylakoid	283	13	6.31	0.00648
7	GO:0006833	water transport	46	5	0.92	0.00217		7	GO:0005506	iron ion binding	287	13	5.93	0.00667		7	GO:0009523	photosystem II	62	5	1.38	0.0121
8	GO:0010099	regulation of photomorphogenesis	5	2	0.1	0.00384		8	GO:0003700	sequence-specific DNA binding transcript...	382	17	7.89	0.00931		8	GO:0009522	photosystem I	84	5	1.87	0.0392
9	GO:0009414	response to water deprivation	55	5	1.1	0.00476		9	GO:0016705	oxidoreductase activity, acting on paire...	339	17	7.01	0.01353		9	GO:0017101	aminoacyl-tRNA synthetase multienzyme co...	2	1	0.04	0.04413
10	GO:0006570	tyrosine metabolic process	6	2	0.12	0.00568		10	GO:0031409	pigment binding	27	3	0.56	0.01767		10	GO:0008180	COP9 signalosome	2	1	0.04	0.04413
11	GO:0009073	aromatic amino acid family biosynthetic ...	38	4	0.76	0.00679		11	GO:0016747	transferase activity, transferring acyl ...	241	11	4.98	0.01889
12	GO:0044550	secondary metabolite biosynthetic proces...	230	13	4.61	0.00726		12	GO:0047134	protein-disulfide reductase activity	1	1	0.02	0.02066
13	GO:0010017	red or far-red light signaling pathway	22	3	0.44	0.00923		13	GO:0043495	protein anchor	1	1	0.02	0.02066
14	GO:0006591	ornithine metabolic process	8	2	0.16	0.01033		14	GO:0009815	1-aminocyclopropane-1-carboxylate oxidas...	1	1	0.02	0.02066
15	GO:0010207	photosystem II assembly	8	2	0.16	0.01033		15	GO:0016767	geranylgeranyl-diphosphate geranylgerany...	1	1	0.02	0.02066
16	GO:0043604	amide biosynthetic process	23	3	0.46	0.01046		16	GO:0030975	thiamine binding	1	1	0.02	0.02066
17	GO:0046148	pigment biosynthetic process	48	5	0.96	0.01408		17	GO:0097007	4,8,12-trimethyltrideca-1,3,7,11-tetraen...	1	1	0.02	0.02066
18	GO:0009416	response to light stimulus	195	14	3.91	0.01553		18	GO:0004425	indole-3-glycerol-phosphate synthase act...	1	1	0.02	0.02066
19	GO:0055114	oxidation-reduction process	1172	36	23.48	0.01609		19	GO:0030586	[methionine synthase] reductase activity	1	1	0.02	0.02066
20	GO:0045892	negative regulation of transcription, DN...	102	6	2.04	0.01657		20	GO:0005358	high-affinity hydrogen:glucose symporter...	1	1	0.02	0.02066
21	GO:0043496	regulation of protein homodimerization a...	1	1	0.02	0.02003		21	GO:0009011	starch synthase activity	1	1	0.02	0.02066
22	GO:0010581	regulation of starch biosynthetic proces...	1	1	0.02	0.02003		22	GO:0044318	L-aspartate:fumarate oxidoreductase acti...	1	1	0.02	0.02066
23	GO:0042754	negative regulation of circadian rhythm	1	1	0.02	0.02003		23	GO:0001085	RNA polymerase II transcription factor b...	30	3	0.62	0.02345
24	GO:0070455	positive regulation of heme biosynthetic...	1	1	0.02	0.02003		24	GO:0016722	oxidoreductase activity, oxidizing metal...	56	5	1.16	0.02629
25	GO:0010067	procambium histogenesis	1	1	0.02	0.02003		25	GO:0010277	chlorophyllide a oxygenase [overall] act...	2	1	0.04	0.0409
26	GO:0010055	atrichoblast differentiation	1	1	0.02	0.02003		26	GO:0004831	tyrosine-tRNA ligase activity	2	1	0.04	0.0409
27	GO:0034051	negative regulation of plant-type hypers...	1	1	0.02	0.02003		27	GO:0003913	DNA photolyase activity	2	1	0.04	0.0409
28	GO:0032107	regulation of response to nutrient level...	1	1	0.02	0.02003		28	GO:0008453	alanine-glyoxylate transaminase activity	2	1	0.04	0.0409
29	GO:0071484	cellular response to light intensity	1	1	0.02	0.02003		29	GO:0043874	acireductone synthase activity	2	1	0.04	0.0409
30	GO:1900458	negative regulation of brassinosteroid m...	1	1	0.02	0.02003
31	GO:1902000	homogentisate catabolic process	1	1	0.02	0.02003
32	GO:0006437	tyrosyl-tRNA aminoacylation	1	1	0.02	0.02003
33	GO:0002938	tRNA guanine ribose methylation	1	1	0.02	0.02003
34	GO:0031539	positive regulation of anthocyanin metab...	1	1	0.02	0.02003
35	GO:0009807	lignan biosynthetic process	1	1	0.02	0.02003
36	GO:0006662	glycerol ether metabolic process	34	3	0.68	0.03009
37	GO:0006558	L-phenylalanine metabolic process	14	2	0.28	0.03103
38	GO:0010971	positive regulation of G2/M transition o...	2	1	0.04	0.03966
39	GO:0010600	regulation of auxin biosynthetic process	2	1	0.04	0.03966
40	GO:0090391	granum assembly	2	1	0.04	0.03966
41	GO:1901671	positive regulation of superoxide dismut...	2	1	0.04	0.03966
42	GO:0043620	regulation of DNA-templated transcriptio...	2	1	0.04	0.03966
All phyA-D vs. phyA-R DETs
Biological Process GO enrichment								Molecular Function GO enrichment								Cellular Component GO enrichment
	GO.ID	Term	Annotated	Significant	Expected	p-value			GO.ID	Term	Annotated	Significant	Expected	p-value			GO.ID	Term	Annotated	Significant	Expected	p-value
1	GO:0009813	flavonoid biosynthetic process	171	29	9.23	9.4e-08		1	GO:0003700	sequence-specific DNA binding transcript...	382	49	20.5	2.3e-08		1	GO:0071944	cell periphery	1091	83	50.84	5.8e-05
2	GO:0009755	hormone-mediated signaling pathway	257	43	13.87	1.9e-07		2	GO:0016705	oxidoreductase activity, acting on paire...	339	43	18.19	1.1e-06		2	GO:0031428	box C/D snoRNP complex	6	3	0.28	0.0018
3	GO:0052696	flavonoid glucuronidation	163	26	8.8	5.9e-07		3	GO:0005506	iron ion binding	287	36	15.4	1.6e-06		3	GO:0016020	membrane	4508	240	210.08	0.0075
4	GO:0080163	regulation of protein serine/threonine p...	27	8	1.46	6.1e-05		4	GO:0046906	tetrapyrrole binding	411	44	22.06	8.6e-06		4	GO:0005576	extracellular region	264	21	12.3	0.012
5	GO:2001141	regulation of RNA biosynthetic process	1346	103	72.65	9.2e-05		5	GO:0035251	UDP-glucosyltransferase activity	133	20	7.14	2.6e-05		5	GO:0009506	plasmodesma	170	14	7.92	0.0271
6	GO:0009800	cinnamic acid biosynthetic process	6	4	0.32	0.00012		6	GO:0010427	abscisic acid binding	27	8	1.45	5.9e-05		6	GO:0005618	cell wall	211	16	9.83	0.0371
7	GO:0060918	auxin transport	41	9	2.21	0.00027		7	GO:0045548	phenylalanine ammonia-lyase activity	6	4	0.32	0.00011		7	GO:0044439	peroxisomal part	17	3	0.79	0.042
8	GO:2000022	regulation of jasmonic acid mediated sig...	19	6	1.03	0.00036		8	GO:0051213	dioxygenase activity	191	23	10.25	0.00023		8	GO:0042807	central vacuole	1	1	0.05	0.0466
9	GO:0006559	L-phenylalanine catabolic process	8	4	0.43	0.00049		9	GO:0016628	oxidoreductase activity, acting on the C...	14	5	0.75	0.00058
10	GO:0009638	phototropism	4	3	0.22	0.0006		10	GO:0050660	flavin adenine dinucleotide binding	157	18	8.43	0.00188
11	GO:0044550	secondary metabolite biosynthetic proces...	230	30	12.41	0.00125		11	GO:0004872	receptor activity	50	10	2.68	0.00239
12	GO:0006952	defense response	327	31	17.65	0.00256		12	GO:0003913	DNA photolyase activity	2	2	0.11	0.00288
13	GO:0010201	response to continuous far red light sti...	2	2	0.11	0.00291		13	GO:0043565	sequence-specific DNA binding	407	35	21.84	0.00388
14	GO:0009695	jasmonic acid biosynthetic process	7	3	0.38	0.00465		14	GO:0015930	glutamate synthase activity	3	2	0.16	0.00832
15	GO:0006536	glutamate metabolic process	14	4	0.76	0.00545		15	GO:0004575	sucrose alpha-glucosidase activity	3	2	0.16	0.00832
16	GO:0009690	cytokinin metabolic process	22	5	1.19	0.00552		16	GO:0019139	cytokinin dehydrogenase activity	9	3	0.48	0.01013
17	GO:0055114	oxidation-reduction process	1172	84	63.26	0.00678		17	GO:0047196	long-chain-alcohol O-fatty-acyltransfera...	9	3	0.48	0.01013
18	GO:0009640	photomorphogenesis	24	5	1.3	0.00814		18	GO:0046983	protein dimerization activity	439	35	23.56	0.01218
19	GO:0010310	regulation of hydrogen peroxide metaboli...	3	2	0.16	0.00841		19	GO:0016758	transferase activity, transferring hexos...	262	33	14.06	0.02237
20	GO:0006656	phosphatidylcholine biosynthetic process	3	2	0.16	0.00841		20	GO:0010181	FMN binding	31	5	1.66	0.02336
21	GO:0009095	aromatic amino acid family biosynthetic ...	9	3	0.49	0.01029		21	GO:0004351	glutamate decarboxylase activity	5	2	0.27	0.02581
22	GO:0010143	cutin biosynthetic process	12	3	0.65	0.02389		22	GO:0016847	1-aminocyclopropane-1-carboxylate syntha...	5	2	0.27	0.02581
23	GO:0009607	response to biotic stimulus	142	13	7.66	0.0239		23	GO:0004722	protein serine/threonine phosphatase act...	97	10	5.21	0.03491
24	GO:0009697	salicylic acid biosynthetic process	5	2	0.27	0.02609		24	GO:0016597	amino acid binding	26	4	1.4	0.04802
25	GO:0001676	long-chain fatty acid metabolic process	5	2	0.27	0.02609
26	GO:0009685	gibberellin metabolic process	32	5	1.73	0.02709
27	GO:0009740	gibberellic acid mediated signaling path...	25	5	1.35	0.02819
28	GO:0010017	red or far-red light signaling pathway	22	4	1.19	0.02831
29	GO:0031408	oxylipin biosynthetic process	23	4	1.24	0.03285
30	GO:0005983	starch catabolic process	6	2	0.32	0.03774
31	GO:0010052	guard cell differentiation	6	2	0.32	0.03774
32	GO:0042744	hydrogen peroxide catabolic process	98	10	5.29	0.03837
33	GO:0019432	triglyceride biosynthetic process	15	3	0.81	0.04382
34	GO:0009651	response to salt stress	49	6	2.64	0.04707
35	GO:0009725	response to hormone	485	61	26.18	0.04708
36	GO:0048544	recognition of pollen	62	7	3.35	0.04862
All WT-D vs. phyA-D DETs
Biological Process GO enrichment								Molecular Function GO enrichment								Cellular Component GO enrichment
	GO.ID	Term	Annotated	Significant	Expected	p-value			GO.ID	Term	Annotated	Significant	Expected	p-value			GO.ID	Term	Annotated	Significant	Expected	p-value
1	GO:0006412	translation	708	291	158.44	8.2e-27		1	GO:0005198	structural molecule activity	156	75	32.82	3.7e-14		1	GO:0022626	cytosolic ribosome	125	92	29.54	< 1e-30
2	GO:0042273	ribosomal large subunit biogenesis	98	44	21.93	5.9e-07		2	GO:0003746	translation elongation factor activity	16	11	3.37	5.3e-05		2	GO:0005840	ribosome	358	181	84.6	2.3e-08
3	GO:0055114	oxidation-reduction process	1172	334	262.28	9.5e-06		3	GO:0016620	oxidoreductase activity, acting on the a...	34	19	7.15	6.2e-05		3	GO:0005746	mitochondrial respiratory chain	14	13	3.31	7.6e-08
4	GO:0009808	lignin metabolic process	30	17	6.71	4.8e-05		4	GO:0016679	oxidoreductase activity, acting on diphe...	25	14	5.26	0.00013		4	GO:0009535	chloroplast thylakoid membrane	146	59	34.5	4e-06
5	GO:0022618	ribonucleoprotein complex assembly	173	60	38.72	0.00014		5	GO:0051082	unfolded protein binding	55	23	11.57	0.00039		5	GO:0005839	proteasome core complex	11	8	2.6	0.00079
6	GO:0009699	phenylpropanoid biosynthetic process	70	29	15.67	0.00027		6	GO:0016615	malate dehydrogenase activity	9	7	1.89	0.00044		6	GO:0070993	translation preinitiation complex	19	11	4.49	0.00138
7	GO:0042274	ribosomal small subunit biogenesis	59	24	13.2	0.00121		7	GO:0016628	oxidoreductase activity, acting on the C...	14	9	2.95	0.00056		7	GO:0005576	extracellular region	264	83	62.38	0.00192
8	GO:0006457	protein folding	168	55	37.6	0.0015		8	GO:0005388	calcium-transporting ATPase activity	12	8	2.52	0.00083		8	GO:0005852	eukaryotic translation initiation factor...	17	10	4.02	0.00195
9	GO:0042775	mitochondrial ATP synthesis coupled elec...	10	7	2.24	0.00175		9	GO:0008970	phosphatidylcholine 1-acylhydrolase acti...	15	9	3.16	0.00115		9	GO:0005740	mitochondrial envelope	88	41	20.79	0.00354
10	GO:0006006	glucose metabolic process	38	18	8.5	0.0018		10	GO:0004298	threonine-type endopeptidase activity	16	9	3.37	0.00214		10	GO:0009523	photosystem II	62	24	14.65	0.00557
11	GO:0006405	RNA export from nucleus	39	17	8.73	0.00255		11	GO:0005525	GTP binding	141	44	29.67	0.00288		11	GO:0005730	nucleolus	101	35	23.87	0.00772
12	GO:0033108	mitochondrial respiratory chain complex ...	16	9	3.58	0.00336		12	GO:0051537	2 iron, 2 sulfur cluster binding	41	16	8.63	0.00651		12	GO:0000786	nucleosome	74	27	17.49	0.00857
13	GO:0042743	hydrogen peroxide metabolic process	103	34	23.05	0.00838		13	GO:0046906	tetrapyrrole binding	411	107	86.47	0.00777		13	GO:0034715	pICln-Sm protein complex	5	4	1.18	0.01262
14	GO:0006633	fatty acid biosynthetic process	116	39	25.96	0.00914		14	GO:0015204	urea transmembrane transporter activity	3	3	0.63	0.0093		14	GO:0009941	chloroplast envelope	151	47	35.68	0.01806
15	GO:0070588	calcium ion transmembrane transport	21	10	4.7	0.00935		15	GO:0016776	phosphotransferase activity, phosphate g...	26	11	5.47	0.01156		15	GO:0005732	small nucleolar ribonucleoprotein comple...	15	8	3.54	0.0284
16	GO:0006108	malate metabolic process	21	10	4.7	0.00935		16	GO:0090447	glycerol-3-phosphate 2-O-acyltransferase...	8	5	1.68	0.01297		16	GO:0005685	U1 snRNP	24	10	5.67	0.03825
17	GO:0044375	regulation of peroxisome size	5	4	1.12	0.01028		17	GO:0003777	microtubule motor activity	55	19	11.57	0.01409		17	GO:0000152	nuclear ubiquitin ligase complex	9	5	2.13	0.03893
18	GO:0071918	urea transmembrane transport	3	3	0.67	0.0112		18	GO:0016491	oxidoreductase activity	1329	354	279.61	0.01569		18	GO:0031261	DNA replication preinitiation complex	4	3	0.95	0.04338
19	GO:0055062	phosphate ion homeostasis	3	3	0.67	0.0112		19	GO:0031409	pigment binding	27	11	5.68	0.01588		19	GO:0010287	plastoglobule	31	12	7.33	0.04359
20	GO:0009641	shade avoidance	3	3	0.67	0.0112		20	GO:0050661	NADP binding	52	18	10.94	0.01625		20	GO:0019866	organelle inner membrane	91	38	21.5	0.04939
21	GO:0035336	long-chain fatty-acyl-CoA metabolic proc...	10	6	2.24	0.0113		21	GO:0003743	translation initiation factor activity	24	10	5.05	0.0178
22	GO:0006536	glutamate metabolic process	14	8	3.13	0.01317		22	GO:0003924	GTPase activity	95	29	19.99	0.01871
23	GO:0006270	DNA replication initiation	17	9	3.8	0.01397		23	GO:0019843	rRNA binding	119	35	25.04	0.01894
24	GO:0009765	photosynthesis, light harvesting	35	14	7.83	0.01435		24	GO:0009678	hydrogen-translocating pyrophosphatase a...	6	4	1.26	0.02033
25	GO:0009266	response to temperature stimulus	58	22	12.98	0.01571		25	GO:0044212	transcription regulatory region DNA bind...	73	23	15.36	0.02348
26	GO:0006591	ornithine metabolic process	8	5	1.79	0.01697		26	GO:0005048	signal sequence binding	12	6	2.52	0.02463
27	GO:0006099	tricarboxylic acid cycle	36	14	8.06	0.01875		27	GO:0080130	L-phenylalanine:2-oxoglutarate aminotran...	4	3	0.84	0.03135
28	GO:0070301	cellular response to hydrogen peroxide	101	32	22.6	0.01923		28	GO:0016762	xyloglucan:xyloglucosyl transferase acti...	37	13	7.78	0.03368
29	GO:0006334	nucleosome assembly	47	17	10.52	0.02194		29	GO:0031369	translation initiation factor binding	16	7	3.37	0.03442
30	GO:0090151	establishment of protein localization to...	6	4	1.34	0.02537		30	GO:0045735	nutrient reservoir activity	56	18	11.78	0.03461
31	GO:0009089	lysine biosynthetic process via diaminop...	6	4	1.34	0.02537		31	GO:0015250	water channel activity	45	15	9.47	0.03756
32	GO:0006570	tyrosine metabolic process	6	4	1.34	0.02537		32	GO:0015254	glycerol channel activity	45	15	9.47	0.03756
33	GO:0000724	double-strand break repair via homologou...	44	15	9.85	0.03055		33	GO:0004372	glycine hydroxymethyltransferase activit...	7	4	1.47	0.03961
34	GO:0006596	polyamine biosynthetic process	18	8	4.03	0.03244		34	GO:0016899	oxidoreductase activity, acting on the C...	7	4	1.47	0.03961
35	GO:0009396	folic acid-containing compound biosynthe...	12	6	2.69	0.03287		35	GO:0016744	transferase activity, transferring aldeh...	10	5	2.1	0.04009
36	GO:0009853	photorespiration	12	6	2.69	0.03287		36	GO:0004332	fructose-bisphosphate aldolase activity	10	5	2.1	0.04009
37	GO:0009414	response to water deprivation	55	19	12.31	0.03551		37	GO:0045543	gibberellin 2-beta-dioxygenase activity	10	5	2.1	0.04009
38	GO:0009084	glutamine family amino acid biosynthetic...	28	12	6.27	0.03602		38	GO:0016746	transferase activity, transferring acyl ...	280	71	58.91	0.04404
39	GO:0006884	cell volume homeostasis	46	16	10.29	0.03712		39	GO:0005310	dicarboxylic acid transmembrane transpor...	6	4	1.26	0.04421
40	GO:0009638	phototropism	4	3	0.9	0.03728		40	GO:0004127	cytidylate kinase activity	2	2	0.42	0.04425
41	GO:0006635	fatty acid beta-oxidation	29	11	6.49	0.04241		41	GO:0003913	DNA photolyase activity	2	2	0.42	0.04425
42	GO:0006627	protein processing involved in protein t...	7	4	1.57	0.04881		42	GO:0008840	4-hydroxy-tetrahydrodipicolinate synthas...	2	2	0.42	0.04425
								43	GO:0005544	calcium-dependent phospholipid binding	17	7	3.58	0.04816
All WT-R vs. phyA-R DETs
Biological Process GO enrichment								Molecular Function GO enrichment								Cellular Component GO enrichment
	GO.ID	Term	Annotated	Significant	Expected	p-value			GO.ID	Term	Annotated	Significant	Expected	p-value			GO.ID	Term	Annotated	Significant	Expected	p-value
1	GO:0006412	translation	708	305	150.31	< 1e-30		1	GO:0003735	structural constituent of ribosome	126	64	25.41	1.4e-14		1	GO:0022626	cytosolic ribosome	125	90	28.07	< 1e-30
2	GO:0006928	cellular component movement	62	32	13.16	1.9e-07		2	GO:0051082	unfolded protein binding	55	30	11.09	1.7e-08		2	GO:0005840	ribosome	358	189	80.39	1.9e-13
3	GO:0042273	ribosomal large subunit biogenesis	98	42	20.81	1.1e-06		3	GO:0003777	microtubule motor activity	55	29	11.09	8.1e-08		3	GO:0005746	mitochondrial respiratory chain	14	11	3.14	1.3e-05
4	GO:0055114	oxidation-reduction process	1172	321	248.82	5.7e-06		4	GO:0015631	tubulin binding	79	33	15.93	9.2e-06		4	GO:0009570	chloroplast stroma	125	49	28.07	1.6e-05
5	GO:0043039	tRNA aminoacylation	56	25	11.89	7.1e-05		5	GO:0030060	L-malate dehydrogenase activity	7	6	1.41	0.00039		5	GO:0009536	plastid	671	211	150.68	0.00011
6	GO:0045037	protein import into chloroplast stroma	6	6	1.27	9.1e-05		6	GO:0070181	small ribosomal subunit rRNA binding	12	8	2.42	0.00061		6	GO:0005739	mitochondrion	370	124	83.09	0.00014
7	GO:0042026	protein refolding	10	8	2.12	0.00012		7	GO:0008970	phosphatidylcholine 1-acylhydrolase acti...	15	9	3.02	0.00083		7	GO:0005875	microtubule associated complex	35	18	7.86	0.00016
8	GO:0009658	chloroplast organization	62	26	13.16	0.00018		8	GO:0016620	oxidoreductase activity, acting on the a...	34	16	6.86	0.0009		8	GO:0044815	DNA packaging complex	80	32	17.96	0.0003
9	GO:0019430	removal of superoxide radicals	13	9	2.76	0.00036		9	GO:0004812	aminoacyl-tRNA ligase activity	56	21	11.29	0.00201		9	GO:0009941	chloroplast envelope	151	51	33.91	0.00086
10	GO:0009407	toxin catabolic process	49	21	10.4	0.00052		10	GO:0043022	ribosome binding	32	14	6.45	0.00209		10	GO:0009295	nucleoid	16	10	3.59	0.00187
11	GO:0006575	cellular modified amino acid metabolic p...	124	42	26.33	0.00064		11	GO:0016776	phosphotransferase activity, phosphate g...	26	12	5.24	0.00249		11	GO:0070993	translation preinitiation complex	19	10	4.27	0.0039
12	GO:0009084	glutamine family amino acid biosynthetic...	28	14	5.94	0.0007		12	GO:0046906	tetrapyrrole binding	411	106	82.87	0.00286		12	GO:0005852	eukaryotic translation initiation factor...	17	9	3.82	0.00586
[truncated: 130 more rows]

## Sheet: Supp_Tab_6
Supplemental Table 6. DETs and DEPs annotated as being involed in glycolysis, gluconeogenesis, the TCA cycle, the glyoxylate cycle, or beta oxidation. See Figure 2.
[truncated: 111 more rows]

[truncated: 8 more sheets: Supp_Tab_7, Supp_Tab_8, Supp_Tab_9, Supp_Tab_10, Supp_Tab_11, Supp_Tab_12, Supp_Tab_13, Supp_Tab_14]
